# Supplementary material for: 3D printed elastomers with Sylgard-184-like mechanical properties and tuneable degradability
Source: Polym Chem. 2022 Mar 30;13(16):2271–6. doi: 10.1039/d2py00113f (PMC9016719; doi:10.1039/d2py00113f)
Supplement: PY-013-D2PY00113F-s001 [file PY-013-D2PY00113F-s001.xlsx]

## Sheet: Figure 1
	Panel A											Panel B
	100/0		90/10		85/15		80/20		70/30			100/0												90/10												85/15												80/20
	T	η	T	η	T	η	T	η	T	η		Sample 1		Sample 2		Sample 3		Sample 4		Sample 5		Sample 6		Sample 1		Sample 2		Sample 3		Sample 4		Sample 5		Sample 6		Sample 1		Sample 2		Sample 3		Sample 4		Sample 5		Sample 6		Sample 1
	°C	mPa s	°C	mPa s	°C	mPa s	°C	mPa s	°C	mPa s		Strain	Stress	Strain	Stress	Strain	Stress	Strain	Stress	Strain	Stress	Strain	Stress	Strain	Stress	Strain	Stress	Strain	Stress	Strain	Stress	Strain	Stress	Strain	Stress	Strain	Stress	Strain	Stress	Strain	Stress	Strain	Stress	Strain	Stress	Strain	Stress	Strain	Stress
	70.0311	25268.8	69.997	19773.4	69.9863	14159.3	70	8788.95	69.9984	6747.66		%	MPa	%	MPa	%	MPa	%	MPa	%	MPa	%	MPa	%	MPa	%	MPa	%	MPa	%	MPa	%	MPa	%	MPa	%	MPa	%	MPa	%	MPa	%	MPa	%	MPa	%	MPa	%	MPa
	70.0431	25234.6	70.0211	19756.8	70.0352	14137.4	70.0248	8790.37	70.0129	6743.11		0	0	0	0	0	0	0	0	0	0	0	0	0	0	0	0	0	0	0	0	0	0	0	0	0	0	0	0	0	0	0	0	0	0	0	0	0	0
	70.0901	25181.8	70.097	19726.3	70.0965	14111.9	70.0641	8782.63	70.0491	6728.7		0.23936	0.000895979	0.23716	0.00183	0.23269	0.00119	0.25513	0.0026	0.23661	0.00122	0.26	0.00219	0.25122	0.00341	0.23997	0.00385	0.25154	0.00431	0.25067	0.00289	0.25872	0.00306	0.25377	0.00228	0.25128	0.00777	0.26436	0.00188	0.25154	0.00547	0.25148	0.00373	0.25179	0.0068	0.25821	0.00658	0.25154	0.0071
	70.1337	25123.9	70.1768	19694.2	70.2118	14161.5	70.1415	8765.86	70.1339	6716.03		0.48625	0.00178	0.48352	0.00495	0.45757	0.00181	0.51385	0.00603	0.48216	0.00223	0.51897	0.00384	0.49232	0.00757	0.48899	0.00884	0.51256	0.0106	0.49565	0.00625	0.51026	0.00456	0.50007	0.00555	0.51256	0.0168	0.52308	0.00409	0.51256	0.01271	0.50523	0.00752	0.51308	0.01592	0.51	0.01402	0.51256	0.01636
	70.2378	25080.8	70.3023	19700.2	70.3331	14071.7	70.2799	8750.26	70.2281	6704.08		0.72439	0.00535	0.7231	0.00801	0.69072	0.00432	0.76718	0.00828	0.72191	0.00524	0.77564	0.00357	0.74428	0.01327	0.7319	0.01523	0.76513	0.01678	0.7436	0.01083	0.77154	0.00887	0.74937	0.01036	0.76513	0.02563	0.77487	0.00449	0.76487	0.01979	0.75974	0.01289	0.76564	0.02472	0.77077	0.02301	0.76513	0.02632
	70.36	25017.2	70.4253	19577.3	70.448	13909.1	70.4653	8720.97	70.3365	6683.03		0.97031	0.00802	0.96535	0.01072	0.91812	0.0068	1.02513	0.01088	0.96335	0.00751	1.03051	0.00516	0.98883	0.01897	0.97652	0.02114	1.0241	0.02207	0.99303	0.01575	1.02385	0.01314	1.00114	0.0151	1.02436	0.03369	1.03564	0.00681	1.02436	0.02636	1.00668	0.0197	1.02462	0.03257	1.02385	0.03196	1.02436	0.03636
	70.4837	24893.8	70.5906	19486.4	70.6478	13904.1	70.5963	8692.05	70.4485	6667		1.2138	0.01159	1.21001	0.01378	1.14829	0.00866	1.28308	0.01364	1.2072	0.01023	1.28897	0.00729	1.23586	0.0239	1.22432	0.02687	1.28231	0.02767	1.23653	0.0201	1.28256	0.01706	1.24397	0.01952	1.28231	0.04188	1.28821	0.00951	1.28256	0.03305	1.26372	0.02642	1.28282	0.04077	1.28256	0.03995	1.28231	0.04659
	70.5895	24681.8	70.776	19426.6	70.7552	13929.9	70.7113	8696.83	70.5863	6628.16		1.45413	0.01363	1.44717	0.01651	1.37982	0.0112	1.53641	0.01607	1.4443	0.01264	1.54256	0.00954	1.48609	0.0294	1.46429	0.03236	1.53436	0.03282	1.48719	0.02394	1.54103	0.0213	1.49848	0.02363	1.53462	0.04935	1.54718	0.01231	1.53436	0.03928	1.51267	0.03392	1.53513	0.04831	1.54103	0.04805	1.53487	0.05645
	70.7572	24646.7	70.9365	19319.1	70.8803	13868.2	70.8887	8667.03	70.7423	6610.94		1.69908	0.01674	1.69305	0.01882	1.60471	0.01319	1.79692	0.01856	1.68912	0.01499	1.80051	0.01177	1.72818	0.0344	1.71331	0.03742	1.7941	0.03771	1.73119	0.02825	1.79308	0.02512	1.74305	0.02798	1.79385	0.05677	1.80538	0.01549	1.7941	0.04552	1.76643	0.04091	1.79436	0.05573	1.79308	0.05563	1.79385	0.06621
	70.8903	24635	71.0529	18990.1	71.0209	13732	71.0439	8642.82	70.9037	6618.87		1.93916	0.01979	1.93311	0.02171	1.83831	0.01514	2.0482	0.02092	1.92887	0.01754	2.05846	0.01435	1.97841	0.03907	1.95548	0.04281	2.04795	0.04266	1.97988	0.03227	2.05282	0.02918	1.99333	0.03185	2.04795	0.06399	2.05769	0.01884	2.04795	0.0516	2.02043	0.04847	2.04846	0.06292	2.05231	0.06268	2.04821	0.07606
	71.0466	24459.1	71.1969	19049.9	71.1794	13732.4	71.1994	8577.19	71.0821	6574.96		2.18362	0.02199	2.17511	0.02397	2.0648	0.01738	2.30897	0.0232	2.16959	0.01997	2.31205	0.01661	2.22519	0.04408	2.20084	0.04754	2.30538	0.04732	2.22931	0.0366	2.30692	0.03317	2.24461	0.0363	2.30564	0.07085	2.31718	0.02251	2.30564	0.05745	2.26863	0.05553	2.3059	0.06999	2.30667	0.07024	2.30564	0.0857
	71.1818	24288.3	71.3058	19132	71.299	13639	71.2974	8555.12	71.2247	6503.62		2.42735	0.02513	2.41953	0.02675	2.29588	0.01907	2.56436	0.02567	2.41393	0.02265	2.57205	0.01918	2.47097	0.04857	2.44815	0.05265	2.56513	0.05209	2.47182	0.04039	2.56436	0.03717	2.48843	0.04013	2.56513	0.07769	2.57128	0.02644	2.56462	0.06344	2.5239	0.06289	2.56487	0.077	2.56385	0.07736	2.56487	0.09516
	71.3564	24224.1	71.4214	18977.7	71.4443	13570.7	71.4144	8507.98	71.3397	6473.08		2.66769	0.02737	2.65718	0.02928	2.52696	0.02115	2.81949	0.0277	2.6515	0.02491	2.82359	0.02173	2.72244	0.05303	2.68836	0.05728	2.81641	0.05664	2.72323	0.04439	2.82333	0.0415	2.74096	0.04406	2.81615	0.08427	2.82872	0.03062	2.81667	0.06911	2.77463	0.07013	2.81641	0.08372	2.82308	0.08446	2.81641	0.10463
	71.4608	24063.9	71.5802	18808.2	71.5732	13448.7	71.5391	8453.85	71.4646	6438.54		2.91336	0.03012	2.90281	0.03168	2.75277	0.02318	3.07872	0.03027	2.89608	0.02684	3.0841	0.02407	2.96255	0.05726	2.93665	0.06219	3.07718	0.0611	2.96722	0.04819	3.07487	0.04535	2.98851	0.04796	3.07718	0.09076	3.08769	0.03534	3.07692	0.07461	3.02686	0.07714	3.07718	0.09053	3.07487	0.09092	3.07718	0.1138
	71.5782	23933.6	71.6991	18740.4	71.7344	13388.1	71.6852	8398.55	71.6177	6385.71		3.15248	0.03315	3.14336	0.03418	2.98545	0.02495	3.33103	0.03243	3.13632	0.02966	3.34	0.02664	3.21451	0.06139	3.18078	0.0667	3.33	0.06568	3.21616	0.05156	3.33564	0.04919	3.23705	0.05174	3.33	0.09739	3.33949	0.0398	3.33	0.08016	3.28213	0.08446	3.33026	0.0971	3.33564	0.09766	3.33026	0.12287
	71.7445	23767.1	71.8375	18643.3	71.9145	13436.4	71.8698	8345.2	71.7212	6362.74		3.39742	0.03517	3.38464	0.03642	3.21286	0.02736	3.59026	0.03462	3.37679	0.03175	3.59436	0.02906	3.45981	0.06608	3.42442	0.07106	3.58718	0.0701	3.46485	0.05574	3.58872	0.053	3.48958	0.05556	3.58744	0.10358	3.6	0.04478	3.58744	0.0855	3.52983	0.09119	3.58744	0.1035	3.58846	0.10409	3.58718	0.13157
	71.8591	23633.1	72.0016	18532.8	72.0353	13315.7	71.9657	8322.36	71.8507	6364.71		3.6414	0.03824	3.63027	0.03901	3.4421	0.02881	3.84667	0.03671	3.62161	0.03444	3.8541	0.03191	3.7056	0.07026	3.67271	0.07593	3.84641	0.07433	3.70835	0.0593	3.84641	0.05672	3.7319	0.05927	3.84615	0.10974	3.85308	0.04996	3.84667	0.09083	3.7861	0.09812	3.84641	0.11005	3.8459	0.11042	3.84641	0.14032
	71.9792	23544.8	72.0818	18429.8	72.1696	13148.1	72.0339	8267.59	71.9868	6310.47		3.88124	0.0402	3.86671	0.04123	3.67456	0.03111	4.10103	0.03858	3.85774	0.0365	4.10641	0.03459	3.95657	0.07445	3.91244	0.08019	4.09769	0.07837	3.95877	0.06312	4.10513	0.0609	3.98592	0.06292	4.09769	0.11593	4.11026	0.05524	4.09769	0.09626	4.03481	0.1051	4.09795	0.11648	4.10513	0.11734	4.09769	0.14886
	72.1016	23377.7	72.2068	18365.2	72.2827	13093.4	72.2223	8184.19	72.075	6257.3		4.12716	0.04286	4.11331	0.04354	3.89967	0.03267	4.36051	0.04078	4.10377	0.03866	4.36564	0.03689	4.19816	0.07854	4.16195	0.08483	4.35923	0.0826	4.2035	0.06598	4.35667	0.06436	4.23148	0.06667	4.35897	0.12195	4.36949	0.06067	4.35949	0.1014	4.28856	0.11178	4.35974	0.12263	4.35641	0.12286	4.35923	0.15748
	72.2231	23162.2	72.3186	18235.4	72.3717	13010.8	72.379	8155.3	72.203	6236.53		4.36555	0.04579	4.35361	0.04586	4.13282	0.03472	4.61333	0.04306	4.34328	0.04094	4.62154	0.03966	4.44914	0.08249	4.40412	0.08946	4.61077	0.08665	4.4517	0.06977	4.61821	0.06807	4.48077	0.07029	4.61103	0.12798	4.62103	0.06601	4.61103	0.10669	4.54332	0.11851	4.61103	0.12901	4.61821	0.12858	4.61103	0.16582
	72.3569	23075.5	72.4554	18116.8	72.4768	12828.7	72.5049	8107.58	72.4078	6190.37		4.61171	0.04803	4.59537	0.04803	4.35954	0.03645	4.87128	0.04504	4.58448	0.04293	4.87641	0.04197	4.69443	0.08672	4.64972	0.09372	4.87051	0.09042	4.70014	0.07343	4.86974	0.07199	4.73305	0.07419	4.87026	0.13372	4.88231	0.0714	4.87051	0.11178	4.79026	0.12498	4.87051	0.1349	4.86949	0.13544	4.87051	0.17391
	72.4805	22967	72.594	18030.7	72.6176	12798.9	72.6102	8066.32	72.495	6148.85		4.85495	0.05055	4.84028	0.05047	4.59039	0.03818	5.12923	0.04717	4.82906	0.04518	5.13538	0.04471	4.94121	0.09049	4.89728	0.09805	5.12795	0.09477	4.94438	0.0768	5.12923	0.07543	4.97562	0.0775	5.12821	0.13968	5.1341	0.07719	5.12769	0.11701	5.04704	0.13129	5.12795	0.14122	5.12897	0.14125	5.12795	0.18225
	72.5766	22817.9	72.7267	17884.9	72.7212	12771.8	72.7631	7994.96	72.6221	6120.3		5.09553	0.05251	5.07696	0.05251	4.82193	0.04048	5.38256	0.04904	5.06519	0.04742	5.38872	0.04739	5.19144	0.09495	5.137	0.10242	5.38026	0.09852	5.1948	0.08028	5.38641	0.07934	5.23013	0.08106	5.38026	0.14522	5.39359	0.08251	5.38051	0.12203	5.29651	0.13758	5.38026	0.14692	5.38641	0.14742	5.38026	0.19008
	72.7485	22627.1	72.8411	17821.4	72.8295	12892.6	72.8401	7951.64	72.7462	6083.05		5.34071	0.05556	5.32307	0.05457	5.04681	0.04208	5.64359	0.05098	5.31098	0.04937	5.64641	0.04982	5.43353	0.0989	5.38603	0.10631	5.64	0.10255	5.43929	0.08359	5.63897	0.08297	5.47495	0.08462	5.64	0.15095	5.65077	0.08798	5.64	0.1269	5.54975	0.14356	5.64026	0.15268	5.63872	0.15306	5.64	0.19787
	72.8992	22557.8	72.976	17633.1	72.9684	12650.6	72.9879	7918.66	72.8783	6046.39		5.5808	0.0579	5.56362	0.05685	5.28088	0.04386	5.89436	0.0534	5.55097	0.05217	5.90462	0.05262	5.68401	0.1026	5.62844	0.11065	5.89462	0.10648	5.68822	0.0869	5.89897	0.08669	5.72573	0.0879	5.89462	0.15673	5.90359	0.09312	5.89436	0.13176	5.80401	0.14994	5.89487	0.15869	5.89846	0.15887	5.89487	0.20587
	72.9864	22405.7	73.106	17568.4	73.1364	12475	73.1068	7876.19	72.9861	6018		5.82502	0.06034	5.8049	0.05869	5.50622	0.04592	6.15436	0.0553	5.7912	0.05376	6.15795	0.05518	5.93029	0.10668	5.87355	0.11463	6.15154	0.11011	5.93716	0.09057	6.15333	0.09051	5.97651	0.09165	6.15205	0.16211	6.16308	0.09838	6.1518	0.13659	6.05171	0.15583	6.15205	0.16435	6.15308	0.16466	6.1518	0.21335
	73.1022	22292.5	73.2327	17473.4	73.2564	12449.1	73.2287	7803.28	73.0986	5946.32		6.06899	0.06279	6.05005	0.06092	5.73753	0.04739	6.41128	0.05738	6.03602	0.05621	6.41872	0.05781	6.17583	0.11055	6.1216	0.11889	6.41128	0.11409	6.17942	0.09397	6.41051	0.09387	6.22083	0.09506	6.41128	0.1677	6.41769	0.10361	6.41128	0.14147	6.30773	0.16167	6.41103	0.1703	6.41026	0.17005	6.41103	0.22102
	73.2474	22168.8	73.3649	17382.1	73.3793	12395.9	73.3385	7791.56	73.2332	5934.35		6.3086	0.06488	6.28745	0.06287	5.96907	0.04941	6.6659	0.05909	6.27336	0.05836	6.67	0.06017	6.42755	0.11439	6.36157	0.12284	6.66256	0.11782	6.43108	0.09702	6.67	0.0976	6.47286	0.09862	6.66256	0.1729	6.67513	0.10889	6.66256	0.14605	6.5582	0.16756	6.66282	0.17588	6.66949	0.17582	6.66256	0.22825
	73.3391	22044.4	73.4904	17232.6	73.4926	12333.2	73.4567	7737.58	73.3776	5919.04		6.55427	0.06717	6.53236	0.06498	6.19418	0.05087	6.92436	0.06086	6.51721	0.06018	6.92974	0.06259	6.66815	0.11839	6.60961	0.12706	6.92333	0.12146	6.67482	0.10055	6.92128	0.10089	6.72041	0.10211	6.92308	0.17806	6.9341	0.11427	6.92333	0.15066	6.81044	0.17325	6.92359	0.18141	6.92077	0.18104	6.92308	0.23566
	73.4664	22097.2	73.6236	17141.1	73.587	12278.8	73.5687	7699.76	73.4818	5882.48		6.79412	0.0696	6.77339	0.06703	6.4271	0.05274	7.17769	0.06301	6.75793	0.06264	7.18641	0.06515	6.91962	0.12205	6.85374	0.13113	7.17538	0.12519	6.9245	0.10407	7.18179	0.10425	6.9687	0.1053	7.1759	0.1835	7.18564	0.11938	7.17564	0.1553	7.06445	0.17923	7.1759	0.18693	7.18154	0.1863	7.17564	0.24302
	73.6131	21896.3	73.7273	17059.3	73.6996	12340.3	73.7287	7627.84	73.5978	5825.17		7.03955	0.07191	7.01467	0.06893	6.65542	0.05447	7.43589	0.06467	6.99792	0.06468	7.44103	0.06759	7.16491	0.12596	7.09787	0.13485	7.43411	0.12862	7.17319	0.10646	7.43436	0.10748	7.22122	0.1088	7.43384	0.18866	7.4459	0.12426	7.43411	0.1599	7.31341	0.18479	7.4341	0.19228	7.43384	0.19191	7.43411	0.25028
	73.7114	21661.8	73.8182	16982.6	73.8318	12184.2	73.8573	7609.13	73.7041	5800.57		7.28279	0.07438	7.2603	0.07111	6.88489	0.05601	7.69282	0.06691	7.24371	0.06707	7.69974	0.07011	7.41119	0.12952	7.34518	0.13902	7.69257	0.13226	7.41644	0.11042	7.69282	0.11061	7.4643	0.11201	7.69257	0.19389	7.69872	0.12938	7.69231	0.16463	7.56918	0.19069	7.69256	0.1977	7.69257	0.19703	7.69231	0.25728
	73.868	21604.8	73.9802	16850.1	73.9732	11967.9	73.9691	7583.5	73.85	5805.17		7.5224	0.07678	7.49698	0.073	7.11735	0.05795	7.94693	0.06857	7.47984	0.06888	7.95308	0.0726	7.66167	0.1334	7.58589	0.14295	7.94384	0.13572	7.66686	0.11387	7.95128	0.11397	7.71757	0.11515	7.94384	0.1991	7.95718	0.13438	7.94384	0.16915	7.8189	0.19662	7.94436	0.20291	7.95077	0.20312	7.94384	0.26449
	74.0221	21410.3	74.0801	16772.2	74.0858	11942.9	74.0604	7533.75	74.0059	5770.34		7.76904	0.079	7.74358	0.07498	7.34178	0.05969	8.20589	0.07076	7.72563	0.0711	8.21128	0.07477	7.90302	0.13713	7.83467	0.14684	8.20513	0.13929	7.9121	0.11665	8.20282	0.11724	7.96413	0.11856	8.2059	0.20401	8.21538	0.13952	8.20538	0.17372	8.07214	0.20201	8.20564	0.20833	8.20231	0.20747	8.20538	0.27167
	74.1064	21103.3	74.2024	16687.7	74.2291	11925.1	74.2227	7461	74.1175	5715.47		8.00718	0.08137	7.98364	0.07706	7.57538	0.06141	8.45949	0.07244	7.96562	0.07326	8.46769	0.07745	8.15523	0.14052	8.07806	0.15066	8.45744	0.14278	8.1598	0.11987	8.4641	0.12087	8.21292	0.12178	8.45744	0.2092	8.46692	0.14426	8.45744	0.17829	8.32665	0.20748	8.45769	0.21385	8.46384	0.21208	8.45718	0.2784
	74.2161	21038.9	74.3125	16581.9	74.331	11839.7	74.3389	7434.92	74.2245	5696.48		8.25286	0.08348	8.22516	0.0789	7.80187	0.06321	8.71718	0.07406	8.20585	0.07521	8.72231	0.07972	8.40003	0.14425	8.32195	0.15435	8.71641	0.14588	8.40848	0.12329	8.71615	0.12422	8.4642	0.12528	8.71641	0.21413	8.72846	0.14902	8.71641	0.18268	8.57384	0.21281	8.71667	0.2184	8.71564	0.21821	8.71641	0.28558
	74.3168	21012.2	74.4172	16480.5	74.4677	11739.9	74.4569	7398.54	74.3411	5657.28		8.49635	0.08578	8.46982	0.08101	8.03204	0.06481	8.97539	0.07601	8.45019	0.07723	8.98154	0.08238	8.64681	0.14775	8.57	0.15822	8.97436	0.14963	8.65223	0.12639	8.97513	0.12723	8.70777	0.12826	8.97461	0.21933	8.98026	0.15411	8.97461	0.18732	8.83037	0.21803	8.97487	0.22418	8.97513	0.22307	8.97436	0.29267
	74.4375	20926.3	74.5351	16380.8	74.6371	11685.7	74.6022	7361.31	74.4693	5634.23		8.73717	0.08778	8.70723	0.08299	8.26449	0.06648	9.22897	0.07777	8.6868	0.07918	9.23487	0.08482	8.8963	0.15139	8.80996	0.16187	9.22692	0.15299	8.90339	0.12952	9.23308	0.13091	8.96228	0.13163	9.22692	0.2244	9.23949	0.15855	9.22692	0.19155	9.07958	0.22331	9.22718	0.22914	9.23257	0.22839	9.22718	0.29956
	74.5559	20780.9	74.7074	16316.5	74.7563	11631.3	74.7443	7303.36	74.5868	5601.88		8.98211	0.09001	8.95383	0.08477	8.48846	0.06823	9.48897	0.07969	8.93307	0.0814	9.49256	0.08718	9.13888	0.15481	9.05924	0.16549	9.48641	0.15631	9.14738	0.13251	9.48564	0.13388	9.2076	0.135	9.48641	0.22938	9.49769	0.16356	9.48667	0.19593	9.33333	0.22848	9.48692	0.23443	9.48538	0.23317	9.48615	0.3064
	74.7119	20617.2	74.8178	16047.6	74.8499	11565.1	74.8354	7282.49	74.7056	5565.36		9.22195	0.09258	9.19316	0.08672	8.72229	0.06989	9.74077	0.08153	9.17186	0.08345	9.75077	0.08948	9.38886	0.15828	9.30165	0.16935	9.74051	0.15973	9.39582	0.13525	9.74538	0.13704	9.45738	0.13785	9.74051	0.23441	9.75	0.16825	9.74026	0.20046	9.5881	0.23399	9.74077	0.2396	9.74461	0.23838	9.74026	0.31318
	74.8286	20573.9	74.9311	15990.1	74.9731	11469.5	74.9806	7240.06	74.8097	5535.89		9.46665	0.09421	9.43517	0.08853	8.94901	0.07168	10.0008	0.08307	9.4133	0.08532	10.0044	0.09177	9.63564	0.16182	9.54675	0.17257	9.99769	0.16296	9.64501	0.13862	9.99923	0.14033	9.70842	0.14126	9.99769	0.23929	10.0097	0.17304	9.99769	0.20451	9.83579	0.2393	9.99795	0.24453	9.99897	0.24318	9.99744	0.31983
	74.9423	20439.8	75.1211	15983.3	75.0991	11421.8	75.0879	7206.29	74.9133	5500.97		9.71039	0.09678	9.67935	0.09053	9.17986	0.07307	10.2572	0.08525	9.65691	0.08733	10.2646	0.09408	9.88118	0.16509	9.79383	0.17643	10.2567	0.16648	9.88802	0.14156	10.2564	0.14342	9.95223	0.14418	10.2567	0.24428	10.2633	0.17786	10.2572	0.20912	10.0913	0.2445	10.2569	0.24965	10.2561	0.24815	10.2567	0.32673
	75.1001	20353.7	75.2322	16093.6	75.1914	11374.5	75.2038	7158.71	75.1003	5463.52		9.95048	0.09861	9.91724	0.09232	9.41163	0.07478	10.5115	0.08662	9.89425	0.08896	10.5162	0.09635	10.1331	0.16866	10.0345	0.17982	10.5085	0.16969	10.1394	0.14443	10.5156	0.14647	10.2045	0.14721	10.5085	0.24916	10.5203	0.18207	10.5085	0.21333	10.3415	0.24976	10.509	0.25464	10.5154	0.2535	10.5087	0.33327
	75.2165	20195.9	75.3747	15879.1	75.2948	11314.3	75.3012	7117.64	75.2354	5425.72		10.1959	0.10112	10.1626	0.09419	9.63628	0.07628	10.7708	0.08854	10.1388	0.09134	10.7762	0.09854	10.3737	0.17197	10.2826	0.1835	10.769	0.17315	10.3834	0.14762	10.7672	0.14983	10.4521	0.15038	10.7687	0.25389	10.78	0.1868	10.769	0.21764	10.594	0.25476	10.769	0.25971	10.7669	0.25812	10.7687	0.34007
	75.3426	20109.7	75.4768	15663.5	75.4624	11226.4	75.4395	7083.45	75.3283	5404.66		10.4353	0.10301	10.4034	0.09614	9.8692	0.07785	11.0233	0.0902	10.3796	0.09323	11.0328	0.10105	10.6252	0.17516	10.5267	0.18709	11.0228	0.17655	10.6324	0.15023	11.0277	0.15287	10.7009	0.15339	11.0223	0.2588	11.0315	0.19141	11.0226	0.22199	10.8483	0.26	11.0228	0.26476	11.0274	0.26306	11.0223	0.34697
	75.4973	20157.7	75.6136	15593.7	75.6089	11158.6	75.5615	7048.12	75.4466	5376.95		10.6797	0.10501	10.6449	0.09795	10.0968	0.07971	11.2826	0.09164	10.6198	0.09533	11.2869	0.10309	10.8703	0.17885	10.7711	0.19031	11.28	0.17964	10.881	0.15361	11.2813	0.15587	10.9534	0.15682	11.2797	0.26346	11.2918	0.19597	11.2803	0.22602	11.0967	0.26516	11.2805	0.26958	11.281	0.2679	11.2805	0.3534
	75.5922	19984.5	75.7214	15563.6	75.7319	11117.8	75.7235	6994.41	75.5831	5343.9		10.9242	0.10723	10.8906	0.10007	10.3265	0.08121	11.5392	0.09367	10.8653	0.09738	11.5462	0.10538	11.1163	0.18205	11.0186	0.19394	11.539	0.18311	11.1248	0.15641	11.539	0.15906	11.1962	0.15948	11.539	0.26834	11.5456	0.20038	11.5387	0.23047	11.3528	0.27023	11.5392	0.27481	11.5387	0.27263	11.5387	0.36004
	75.6905	19763.9	75.8346	15472.7	75.862	11055.1	75.8574	6963.69	75.7269	5312.15		11.1635	0.10871	11.1268	0.10193	10.5592	0.08285	11.7931	0.09513	11.1007	0.09903	11.799	0.10767	11.3673	0.18553	11.2586	0.19733	11.7903	0.18629	11.3752	0.15926	11.7977	0.16221	11.4497	0.1624	11.79	0.27311	11.8031	0.20461	11.79	0.23485	11.6025	0.27514	11.7903	0.27971	11.7969	0.27747	11.79	0.36664
	75.8487	19418	76.0113	15310	75.9842	10984.7	75.9608	6934.93	75.8692	5258.23		11.4104	0.11097	11.3734	0.10319	10.7841	0.08448	12.0523	0.0969	11.347	0.10073	12.0577	0.10965	11.6086	0.18867	11.5079	0.20079	12.052	0.18951	11.6199	0.16236	12.049	0.16509	11.6955	0.16556	12.0518	0.27793	12.0618	0.20934	12.0515	0.23912	11.8557	0.27989	12.0523	0.28463	12.0482	0.28225	12.052	0.37324
	75.9505	19385.2	76.1217	15252.5	76.1011	10911.1	76.1048	6837.21	76.0072	5241.56		11.6486	0.11325	11.6134	0.10554	11.0177	0.08624	12.3059	0.09863	11.5865	0.10275	12.3149	0.112	11.8608	0.19191	11.7508	0.20433	12.3038	0.19279	11.8679	0.16498	12.3108	0.16833	11.9443	0.1682	12.3038	0.28279	12.3133	0.21378	12.3038	0.24364	12.1102	0.28496	12.3044	0.28975	12.3103	0.28698	12.3044	0.3798
	76.0703	19425.7	76.2355	15196.2	76.2386	10893.5	76.2135	6835.89	76.136	5228.07		11.8945	0.11501	11.8557	0.107	11.244	0.08771	12.5644	0.10007	11.8282	0.10462	12.5685	0.11404	12.1054	0.19542	11.9954	0.20758	12.5626	0.19587	12.1166	0.16794	12.5628	0.17144	12.1966	0.17149	12.5626	0.28735	12.5749	0.21826	12.5626	0.24771	12.3577	0.28971	12.5628	0.29451	12.5623	0.29177	12.5628	0.38624
	76.2034	19488.3	76.3628	15119.8	76.3573	10862.4	76.3293	6814.35	76.2462	5187.36		12.1372	0.11741	12.1003	0.109	11.4739	0.08923	12.8213	0.102	12.0723	0.10644	12.8279	0.11625	12.3522	0.19826	12.2434	0.21103	12.8208	0.19909	12.3606	0.17072	12.8215	0.17445	12.4397	0.17437	12.8203	0.29214	12.8274	0.22278	12.8203	0.25193	12.6144	0.29444	12.8205	0.29924	12.821	0.29652	12.8205	0.39265
	76.3922	19317.3	76.4358	15034.9	76.4398	10749.5	76.4298	6784.1	76.3583	5141.81		12.3781	0.11906	12.337	0.11076	11.7059	0.0912	13.0749	0.10369	12.3089	0.10833	13.081	0.11842	12.6019	0.20147	12.4832	0.21414	13.0728	0.20204	12.6107	0.17354	13.0792	0.17775	12.6944	0.17698	13.0726	0.29675	13.0856	0.22704	13.0723	0.256	12.8634	0.29938	13.0728	0.30416	13.0787	0.30127	13.0726	0.39903
	76.5403	19065.9	76.5766	14991.5	76.5955	10666.6	76.5463	6706.89	76.4907	5122.95		12.6233	0.12116	12.5834	0.11222	11.9308	0.09235	13.3354	0.10529	12.5544	0.11005	13.3397	0.12033	12.8437	0.2046	12.7319	0.21727	13.3323	0.20525	12.8557	0.17628	13.3313	0.18002	12.9392	0.17992	13.3321	0.30128	13.3438	0.23171	13.3323	0.26029	13.1172	0.30376	13.3326	0.30868	13.3313	0.30591	13.3323	0.40565
	76.6259	18954.3	76.703	14884.3	76.7179	10626	76.7065	6693.25	76.5938	5095.47		12.8638	0.12305	12.8232	0.1144	12.1651	0.09394	13.5867	0.10673	12.7935	0.11209	13.5967	0.12274	13.0945	0.20768	12.9746	0.2207	13.5867	0.20854	13.1042	0.17882	13.591	0.18359	13.1893	0.18262	13.5867	0.306	13.5954	0.23597	13.5861	0.26422	13.3709	0.30883	13.5869	0.31354	13.5908	0.31034	13.5867	0.412
	76.7379	18876.3	76.8226	14746.9	76.8256	10587	76.8222	6673.32	76.705	5076.44		13.1073	0.12496	13.0652	0.11551	12.3904	0.09573	13.8467	0.10821	13.0349	0.11364	13.8503	0.12461	13.3412	0.21093	13.2195	0.22372	13.8438	0.2114	13.3536	0.18186	13.8454	0.18665	13.4401	0.18573	13.8441	0.31048	13.8554	0.24045	13.8441	0.26799	13.6191	0.31337	13.8441	0.31815	13.8449	0.3151	13.8441	0.41812
	76.8411	18759.3	76.9297	14622.3	76.9692	10515.1	76.9186	6616.71	76.8213	5032.93		13.352	0.12728	13.3096	0.11779	12.622	0.09699	14.1033	0.10988	13.2785	0.11558	14.1105	0.12698	13.5855	0.21358	13.467	0.22739	14.1031	0.21455	13.5961	0.18452	14.1026	0.18904	13.6841	0.18853	14.1031	0.31514	14.1097	0.24491	14.1031	0.27209	13.8746	0.31787	14.1036	0.32314	14.1023	0.3193	14.1028	0.42453
	76.957	18701.3	77.0427	14628.3	77.0821	10399.4	77.0897	6594.89	76.9504	5017.88		13.5912	0.12891	13.5473	0.11918	12.8533	0.09878	14.3577	0.11148	13.5159	0.11732	14.362	0.12914	13.838	0.21671	13.7077	0.23045	14.3549	0.21766	13.8475	0.18708	14.3615	0.19218	13.9369	0.19125	14.3549	0.31968	14.3672	0.24898	14.3549	0.27591	14.1254	0.32263	14.3554	0.32751	14.3613	0.32398	14.3551	0.43056
	77.0722	18557.5	77.139	14591.4	77.2154	10404.4	77.2224	6544.67	77.1254	4987.77		13.8378	0.13098	13.7922	0.12089	13.0786	0.0998	14.6169	0.11318	13.76	0.11919	14.6223	0.13085	14.0786	0.21979	13.9558	0.23368	14.6154	0.22073	14.091	0.18975	14.6133	0.19507	14.1842	0.19415	14.6156	0.32415	14.6259	0.25319	14.6154	0.27996	14.3779	0.32733	14.6156	0.33216	14.6133	0.32838	14.6156	0.43657
	77.2393	18420.4	77.3167	14547.8	77.2783	10363	77.3297	6508.55	77.2087	4971.94		14.0769	0.13286	14.0334	0.1229	13.3111	0.10131	14.8697	0.115	14.0012	0.12098	14.8787	0.13314	14.3303	0.22271	14.1999	0.23684	14.8682	0.22363	14.3407	0.19224	14.8741	0.19779	14.4323	0.19676	14.8682	0.32848	14.878	0.25721	14.8685	0.28398	14.6321	0.33211	14.8685	0.33671	14.8738	0.33265	14.8682	0.4428
	77.3735	18344.2	77.492	14384.2	77.4068	10293.6	77.4509	6562.73	77.319	4953.9		14.3216	0.13468	14.275	0.12428	13.5394	0.10305	15.1282	0.11625	14.2416	0.12195	15.1328	0.13486	14.5759	0.22592	14.4435	0.23944	15.1262	0.22627	14.5889	0.19509	15.1269	0.20078	14.6853	0.19946	15.1262	0.33291	15.1385	0.26119	15.1259	0.28756	14.8803	0.33659	15.1264	0.341	15.1267	0.33726	15.1259	0.44883
	77.4955	18240.1	77.6236	14331.7	77.5865	10247.2	77.5696	6486.22	77.48	4918.7		14.5653	0.13679	14.5196	0.12628	13.7691	0.10429	15.3854	0.11791	14.4865	0.12437	15.3923	0.137	14.8222	0.22862	14.6913	0.24257	15.3846	0.22945	14.8331	0.19747	15.3849	0.20348	14.9278	0.20189	15.3846	0.33752	15.3913	0.26528	15.3846	0.29178	15.1361	0.34125	15.3849	0.34575	15.3844	0.34155	15.3846	0.45526
	77.6125	18150.7	77.6985	14223	77.7132	10264.7	77.7248	6396.14	77.5593	4897.96		14.8049	0.13851	14.7575	0.1278	14.0016	0.10602	15.6392	0.11933	14.7231	0.1262	15.6451	0.13897	15.0724	0.23165	14.9313	0.24548	15.6362	0.23235	15.0833	0.19993	15.6436	0.20636	15.1816	0.20468	15.6364	0.34181	15.649	0.26936	15.6362	0.29575	15.386	0.34576	15.6367	0.35039	15.6431	0.34612	15.6367	0.4612
	77.7368	18066.5	77.8502	14114.6	77.8768	10124.3	77.8664	6369.03	77.6782	4872.84		15.0518	0.14033	15.0034	0.12947	14.2258	0.10718	15.8985	0.1212	14.9686	0.12775	15.9039	0.14084	15.3137	0.23446	15.1813	0.24876	15.8982	0.23531	15.3285	0.20265	15.8949	0.20908	15.4277	0.2072	15.8979	0.3461	15.9079	0.27365	15.8977	0.29969	15.6395	0.35017	15.8985	0.35491	15.8949	0.35026	15.8979	0.46734
	77.8166	17826.2	77.9552	14071.1	78.0145	9990.7	77.9488	6329.85	77.8518	4836.99		15.2902	0.14226	15.2434	0.1311	14.4598	0.10878	16.1515	0.12259	15.2084	0.12995	16.1608	0.14292	15.5659	0.23718	15.424	0.25201	16.15	0.23843	15.576	0.20514	16.1567	0.21171	15.6772	0.20977	16.15	0.35069	16.1592	0.27771	16.15	0.30372	15.8938	0.3548	16.1505	0.35936	16.1564	0.35454	16.1503	0.47363
	77.933	17776.9	78.1094	13973.1	78.1184	9979.34	78.0965	6260.91	77.9742	4797.86		15.5357	0.14394	15.4855	0.13266	14.6861	0.11039	16.4092	0.12412	15.4498	0.13121	16.4149	0.1445	15.811	0.24044	15.6686	0.25498	16.4087	0.24098	15.8249	0.20803	16.409	0.21467	15.9288	0.21277	16.4087	0.35512	16.4213	0.28187	16.4085	0.30737	16.1413	0.359	16.409	0.36374	16.4085	0.35913	16.4087	0.47949
	78.0329	17733	78.2426	13912.6	78.2329	9942.15	78.2148	6237.57	78.0965	4776.23		15.7791	0.1461	15.7301	0.13448	14.9162	0.11163	16.668	0.12562	15.6937	0.13345	16.6741	0.14654	16.057	0.24291	15.9157	0.25812	16.6664	0.24396	16.0684	0.21035	16.6677	0.21719	16.1716	0.21512	16.6667	0.3596	16.6733	0.28585	16.6667	0.31135	16.3978	0.36332	16.6672	0.36842	16.6674	0.36327	16.6664	0.4857
	78.218	17877.2	78.3413	13782	78.3529	9871.79	78.3464	6219.47	78.1954	4758.31		16.0197	0.14786	15.967	0.13594	15.1485	0.11327	16.9213	0.12683	15.93	0.13471	16.9272	0.1484	16.3075	0.24604	16.1561	0.26086	16.919	0.24659	16.3196	0.21307	16.9254	0.22012	16.4258	0.21772	16.919	0.36389	16.9321	0.28969	16.9192	0.31514	16.6467	0.36778	16.919	0.37264	16.9251	0.36764	16.9192	0.49194
	78.3563	17647.4	78.4876	13735.2	78.4629	9766.6	78.4878	6270.92	78.3873	4724.6		16.2647	0.14942	16.2134	0.13759	15.3731	0.11472	17.1821	0.12836	16.1756	0.13655	17.1846	0.15031	16.5493	0.24864	16.4051	0.26376	17.1787	0.24943	16.5638	0.2155	17.1779	0.22276	16.6716	0.22047	17.1787	0.36823	17.19	0.29399	17.1787	0.31903	16.9007	0.37194	17.1792	0.37705	17.1774	0.37175	17.1787	0.49818
	78.4648	17446.2	78.5969	13669.7	78.6183	9757.37	78.5904	6160.25	78.5228	4704.21		16.5047	0.15119	16.453	0.13932	15.6067	0.1162	17.4328	0.12994	16.4153	0.13842	17.4431	0.15237	16.7996	0.25139	16.6478	0.26695	17.4328	0.25217	16.8125	0.21806	17.4374	0.22539	16.9209	0.22287	17.4328	0.37261	17.442	0.29799	17.4328	0.32286	17.1547	0.37642	17.4331	0.38147	17.4372	0.37608	17.4328	0.50422
	78.6252	17372.6	78.7037	13574.5	78.737	9749.34	78.7295	6104.04	78.6273	4678.03		16.749	0.15304	16.695	0.14082	15.8334	0.11759	17.6928	0.13122	16.6563	0.13986	17.6967	0.15404	17.0463	0.25429	16.8929	0.26953	17.69	0.25471	17.0615	0.22058	17.6915	0.22824	17.1727	0.22558	17.69	0.37667	17.7018	0.30196	17.69	0.32646	17.403	0.38067	17.6902	0.38555	17.691	0.38038	17.69	0.50999
	78.7495	17232.3	78.8403	13496.8	78.8736	9669.87	78.886	6085.97	78.7455	4623.26		16.9929	0.15529	16.9399	0.14261	16.0643	0.11877	17.9495	0.13286	16.9006	0.14189	17.9569	0.15601	17.2916	0.25685	17.1397	0.27247	17.9492	0.25755	17.3042	0.22284	17.9487	0.23065	17.4155	0.228	17.949	0.38104	17.9559	0.30599	17.9492	0.33031	17.6592	0.38496	17.9492	0.39013	17.9487	0.38434	17.9487	0.51598
	78.8552	17140.7	78.9733	13413.8	78.9772	9618.71	78.9991	6052.17	78.8611	4609.63		17.2333	0.15688	17.1773	0.14419	16.2956	0.12012	18.2036	0.13422	17.1375	0.14327	18.2082	0.15792	17.5431	0.25987	17.3802	0.27532	18.2005	0.26024	17.5554	0.22513	18.208	0.23341	17.6686	0.23039	18.2008	0.38529	18.2131	0.30962	18.2008	0.33393	17.9089	0.3893	18.201	0.39418	18.2074	0.38858	18.2005	0.52207
	78.9862	17099.2	79.0987	13431.1	79.0701	9437.28	79.1009	6037.87	79.0164	4596.98		17.4792	0.15826	17.4222	0.14569	16.5207	0.12142	18.4633	0.13592	17.3818	0.14503	18.4682	0.15945	17.7844	0.26238	17.628	0.27831	18.4618	0.26302	17.7994	0.22751	18.4595	0.23584	17.9161	0.23303	18.4613	0.38963	18.472	0.31362	18.4613	0.33762	18.1617	0.39339	18.4618	0.39834	18.4592	0.39248	18.4613	0.52794
	79.0971	16985.7	79.2284	13264.1	79.2146	9446.19	79.2197	6004.06	79.0994	4562.93		17.7183	0.16003	17.6635	0.14722	16.7534	0.12296	18.7164	0.1372	17.6228	0.14668	18.7249	0.16151	18.0357	0.26502	17.8724	0.28122	18.7144	0.26565	18.0488	0.22971	18.72	0.23838	18.1639	0.23519	18.7146	0.39387	18.7238	0.31734	18.7144	0.34129	18.4157	0.3977	18.7149	0.40248	18.72	0.39673	18.7146	0.53386
	79.2172	16866.1	79.326	13187.7	79.3333	9450.08	79.3647	5977.05	79.1908	4550.6		17.9628	0.1619	17.9045	0.14878	16.9815	0.12448	18.9744	0.1384	17.8633	0.14831	18.9792	0.16311	18.281	0.26784	18.1165	0.28387	18.9728	0.26822	18.297	0.23229	18.9731	0.24125	18.4172	0.23801	18.9726	0.39801	18.9844	0.32121	18.9726	0.34494	18.6641	0.40179	18.9723	0.40663	18.9731	0.40108	18.9723	0.53969
	79.3451	16803	79.4997	13141.5	79.4767	9512.11	79.4894	5938.26	79.327	4520.94		18.2065	0.16398	18.1501	0.15045	17.2108	0.12572	19.2313	0.14026	18.1086	0.15015	19.2387	0.16502	18.527	0.27047	18.3651	0.28674	19.2313	0.27114	18.5405	0.23458	19.2315	0.24368	18.6597	0.24042	19.2313	0.40215	19.2377	0.3252	19.2313	0.34884	18.9202	0.40605	19.2315	0.4109	19.231	0.40491	19.231	0.54582
	79.4762	16731.9	79.5915	13031.3	79.5725	9354.74	79.5968	5837.19	79.4727	4497.1		18.4463	0.16538	18.3873	0.15185	17.4434	0.12739	19.4856	0.14143	18.3447	0.15145	19.492	0.16678	18.7777	0.27323	18.6048	0.28957	19.4823	0.27353	18.7914	0.237	19.4898	0.24647	18.9138	0.24263	19.4823	0.40626	19.4954	0.32896	19.4826	0.3524	19.1699	0.41033	19.4826	0.41494	19.4895	0.4091	19.4826	0.55163
	79.6297	16645.1	79.7067	12863.5	79.711	9270.04	79.6993	5826.76	79.6419	4481.19		18.6935	0.16702	18.6339	0.15329	17.6679	0.12853	19.7451	0.14308	18.5905	0.1533	19.7495	0.16843	19.0193	0.27586	18.854	0.29248	19.7441	0.27613	19.0359	0.23947	19.741	0.24879	19.1591	0.245	19.7441	0.41024	19.7541	0.3328	19.7436	0.35622	19.4226	0.41438	19.7444	0.4191	19.7408	0.41301	19.7438	0.5575
	79.724	16509.9	79.8407	12871.1	79.8508	9239.94	79.8147	5837.97	79.7591	4460.68		18.9314	0.16846	18.8732	0.15507	17.9012	0.12994	19.9979	0.14435	18.8297	0.15477	20.0069	0.17032	19.2708	0.27836	19.0965	0.2954	19.9964	0.279	19.2843	0.24164	20.0026	0.25084	19.4086	0.24717	19.9962	0.41459	20.0054	0.33637	19.9964	0.36009	19.6774	0.41862	19.9967	0.42335	20.0023	0.41691	19.9967	0.56357
	79.8205	16445.6	79.959	12852.2	79.9589	9182.98	79.9467	5886.26	79.8793	4432.18		19.1773	0.17005	19.1155	0.15642	18.1286	0.13128	20.2564	0.14567	19.0707	0.1564	20.261	0.17184	19.5158	0.28123	19.3418	0.29793	20.2549	0.28127	19.5333	0.2442	20.2551	0.25379	19.6604	0.24973	20.2551	0.41873	20.2672	0.34002	20.2546	0.36339	19.9251	0.42267	20.2546	0.42743	20.2549	0.42112	20.2549	0.56912
	79.9733	16353.7	80.0698	12897.4	80.07	9145.67	80.0667	5808.9	79.9818	4368.13		19.42	0.17222	19.3601	0.158	18.3586	0.13248	20.5139	0.14747	19.3155	0.15797	20.5208	0.17376	19.7629	0.28375	19.5891	0.30096	20.5131	0.2842	19.7768	0.24649	20.5133	0.25663	19.9032	0.25218	20.5128	0.42291	20.5195	0.34402	20.5131	0.36713	20.1811	0.42664	20.5133	0.43208	20.5131	0.42495	20.5131	0.57531
	80.1164	16271	80.1963	12716.1	80.2261	9058.33	80.1695	5758.48	80.102	4359.08		19.6609	0.17358	19.5971	0.15966	18.5904	0.13393	20.7669	0.14849	19.5519	0.15926	20.7731	0.17554	20.0126	0.2865	19.8291	0.30367	20.7646	0.2868	20.0274	0.2491	20.7715	0.25899	20.1575	0.25462	20.7651	0.42684	20.778	0.34764	20.7649	0.37081	20.4306	0.43074	20.7651	0.43595	20.7715	0.42928	20.7654	0.58124
	80.2014	16165.7	80.3107	12658.7	80.3725	9028.13	80.3219	5737.18	80.2217	4355		19.9058	0.17576	19.8434	0.16087	18.815	0.13546	21.0282	0.15006	19.7977	0.16073	21.0318	0.17724	20.2549	0.28885	20.0781	0.30636	21.0246	0.28921	20.2717	0.25128	21.0236	0.26105	20.4035	0.25712	21.0246	0.43082	21.0361	0.35163	21.0249	0.37449	20.6841	0.43471	21.0251	0.43993	21.0233	0.433	21.0246	0.58701
	80.3457	16078.8	80.45	12588.8	80.4869	9027.69	80.4058	5695.08	80.3156	4378.49		20.1464	0.1772	20.0832	0.16251	19.0495	0.13676	21.279	0.15157	20.0369	0.16243	21.2887	0.17922	20.5052	0.29145	20.3203	0.30935	21.2787	0.29183	20.5204	0.25347	21.2833	0.26357	20.6533	0.2593	21.279	0.43497	21.2879	0.35549	21.279	0.37807	20.9378	0.43912	21.279	0.44419	21.2833	0.43696	21.279	0.59284
	80.4483	16010.5	80.5528	12503.2	80.6297	8938.73	80.5538	5616.58	80.4674	4306.77		20.3904	0.17883	20.325	0.16365	19.2755	0.1383	21.5395	0.15286	20.2777	0.16364	21.5426	0.18087	20.7519	0.29437	20.5654	0.31174	21.5364	0.29403	20.7698	0.25615	21.5377	0.26611	20.9039	0.26184	21.5364	0.43909	21.548	0.35909	21.5361	0.38135	21.1863	0.443	21.5364	0.44803	21.5374	0.44111	21.5364	0.59859
	80.5758	15921.3	80.6935	12458.9	80.7577	8883.8	80.7309	5608.19	80.5742	4287.49		20.6351	0.18059	20.5697	0.16533	19.5064	0.13933	21.7956	0.15413	20.5222	0.16534	21.8033	0.18267	20.997	0.29671	20.8127	0.31471	21.7951	0.29669	21.0123	0.2584	21.7951	0.26841	21.1479	0.2642	21.7954	0.44338	21.8023	0.36278	21.7954	0.38505	21.442	0.44713	21.7956	0.45229	21.7946	0.44489	21.7951	0.60449
	80.6874	15831.1	80.867	12355.8	80.8623	8842.57	80.8638	5599.94	80.7085	4265.27		20.8742	0.18207	20.8073	0.16655	19.7375	0.14094	22.0503	0.15539	20.7591	0.16697	22.0544	0.18436	21.249	0.29956	21.0532	0.31724	22.0472	0.29901	21.2637	0.26042	22.0539	0.27073	21.4007	0.2667	22.0469	0.44741	22.0595	0.36628	22.0472	0.38864	21.6923	0.45127	22.0474	0.45627	22.0541	0.4487	22.0472	0.61047
	80.8586	15758.9	80.9862	12292.1	80.9727	8783.07	80.9902	5572.8	80.8449	4247.67		21.1203	0.18353	21.0522	0.16781	19.9628	0.14217	22.309	0.15667	21.0034	0.16837	22.3141	0.18609	21.4898	0.302	21.3014	0.32014	22.308	0.30154	21.5067	0.26281	22.3059	0.27308	21.6478	0.26887	22.3082	0.45138	22.3185	0.37006	22.308	0.39227	21.9448	0.45503	22.3082	0.46028	22.3056	0.4527	22.3077	0.61636
	80.9931	15672	81.1095	12220.3	81.1358	8752.22	81.0891	5507.14	80.9541	4178.5		21.3597	0.18499	21.294	0.16917	20.195	0.14358	22.562	0.15792	21.2449	0.17011	22.571	0.18775	21.741	0.30435	21.5451	0.32295	22.5603	0.30403	21.7569	0.26503	22.5667	0.27552	21.8966	0.27108	22.5603	0.45546	22.5705	0.37379	22.5605	0.39592	22.1995	0.45927	22.5605	0.46428	22.5664	0.4565	22.5605	0.62216
	81.0884	15694.9	81.2322	12164.6	81.2396	8673.56	81.2382	5496.3	81.0946	4171.35		21.6044	0.18632	21.5348	0.17041	20.4236	0.14502	22.8208	0.15884	21.4849	0.17127	22.8256	0.18939	21.9863	0.30719	21.7892	0.32534	22.8185	0.30632	22.0051	0.26751	22.8192	0.2779	22.1488	0.27363	22.819	0.45934	22.8308	0.37755	22.8185	0.39942	22.4472	0.46315	22.8187	0.46807	22.819	0.46033	22.8187	0.62785
	81.1837	15556.8	81.3531	12088.3	81.3346	8623.01	81.3596	5509.95	81.2356	4166.33		21.8486	0.18847	21.7797	0.172	20.6531	0.14599	23.0777	0.16046	21.7294	0.17301	23.0844	0.19093	22.2328	0.30949	22.0378	0.32824	23.0772	0.30903	22.2486	0.26963	23.0772	0.2801	22.3916	0.27606	23.0769	0.46349	23.0836	0.38106	23.0772	0.40324	22.7037	0.46744	23.0774	0.47219	23.0769	0.46424	23.0769	0.63398
	81.3452	15436.9	81.4556	12038.5	81.478	8583.71	81.4698	5463.05	81.34	4185.09		22.088	0.18991	22.0173	0.17329	20.8855	0.14744	23.332	0.16169	21.9663	0.1745	23.3374	0.19271	22.4831	0.31217	22.277	0.33092	23.3282	0.31135	22.4993	0.27187	23.3359	0.28275	22.6454	0.27832	23.3285	0.46725	23.3415	0.38454	23.3285	0.40678	22.953	0.47161	23.3287	0.47617	23.3354	0.46828	23.3287	0.63972
	81.4431	15392.3	81.5664	11872.7	81.602	8534.87	81.5816	5421.82	81.488	4124.75		22.3349	0.19155	22.2627	0.17478	21.1102	0.14869	23.5915	0.16312	22.2111	0.17612	23.5962	0.19407	22.7252	0.31479	22.527	0.33361	23.59	0.31382	22.7437	0.27419	23.5872	0.28496	22.8912	0.2805	23.59	0.47181	23.6	0.38828	23.5905	0.41041	23.2067	0.47561	23.5903	0.48031	23.5867	0.47213	23.59	0.64546
	81.5553	15310.1	81.6997	11858.2	81.7246	8391.39	81.718	5394.69	81.6135	4105.83		22.573	0.19314	22.504	0.1763	21.3438	0.14992	23.8438	0.1646	22.4518	0.17784	23.8531	0.19607	22.9761	0.31698	22.7694	0.33635	23.8423	0.31644	22.9924	0.27618	23.8487	0.28724	23.141	0.2827	23.8423	0.47601	23.8515	0.39209	23.8423	0.41408	23.461	0.4799	23.8423	0.48447	23.8485	0.47597	23.8423	0.65181
	81.7287	15249.4	81.8528	11832.5	81.8649	8440.15	81.8675	5367.41	81.7355	4078.9		22.8187	0.1945	22.7453	0.17749	21.5703	0.15128	24.1023	0.16569	22.6928	0.17919	24.1074	0.19746	23.2209	0.3198	23.0143	0.33877	24.1013	0.31864	23.2416	0.27862	24.101	0.28984	23.3925	0.28501	24.101	0.47983	24.1131	0.39583	24.1013	0.41736	23.7082	0.48387	24.1013	0.48835	24.1008	0.48011	24.101	0.65761
	81.8492	15178.9	81.9909	11850.2	81.9868	8431.22	81.9942	5345.76	81.86	4064.6		23.0624	0.19636	22.9904	0.179	21.8005	0.15238	24.3597	0.16717	22.9371	0.18093	24.3667	0.19933	23.468	0.32206	23.2621	0.34148	24.3587	0.3213	23.4844	0.28074	24.36	0.29254	23.6359	0.28721	24.359	0.4842	24.3654	0.39957	24.359	0.42103	23.9649	0.48788	24.3592	0.49276	24.3597	0.48396	24.3587	0.66377
	81.9439	15098.4	82.105	11694.1	82.0983	8372.94	82.1169	5285.35	81.9811	3996.53		23.3023	0.19759	23.2271	0.18033	22.0325	0.15393	24.6133	0.16828	23.1733	0.18234	24.6195	0.20091	23.7179	0.32475	23.5023	0.34409	24.6113	0.32362	23.7355	0.28293	24.618	0.2942	23.8894	0.28934	24.6113	0.48833	24.6244	0.40321	24.6115	0.42457	24.2136	0.49204	24.612	0.49677	24.6174	0.488	24.6115	0.66986
	82.0828	14868.5	82.2582	11632.6	82.2274	8311.79	82.1926	5275.87	82.1269	3997.43		23.5479	0.19937	23.4734	0.18173	22.2571	0.15497	24.8746	0.16945	23.4188	0.18346	24.8774	0.20223	23.9603	0.32697	23.7511	0.34662	24.8713	0.32606	23.98	0.28512	24.8702	0.29735	24.1345	0.29167	24.8715	0.4925	24.8818	0.40711	24.871	0.42822	24.4676	0.49569	24.8713	0.50099	24.8695	0.49182	24.871	0.67579
	82.2311	14906.1	82.3667	11567.3	82.3719	8289.23	82.322	5253.02	82.2086	3995.83		23.7875	0.20086	23.713	0.18316	22.4916	0.15615	25.1251	0.17093	23.6586	0.18508	25.1351	0.20393	24.2108	0.32928	23.9942	0.34942	25.1251	0.32843	24.2282	0.28707	25.1298	0.29923	24.3847	0.29375	25.1251	0.4966	25.1344	0.41072	25.1251	0.43186	24.7214	0.49976	25.1254	0.50528	25.1295	0.49581	25.1251	0.68222
	82.3453	14837.8	82.4357	11512	82.4746	8237.69	82.475	5227.43	82.3329	4015.19		24.032	0.20215	23.9553	0.18445	22.7177	0.15749	25.3851	0.17203	23.8995	0.18618	25.3887	0.20558	24.4573	0.33176	24.2381	0.35143	25.3828	0.33076	24.4777	0.28942	25.3838	0.30194	24.6358	0.29611	25.3828	0.50065	25.3944	0.41453	25.3828	0.43532	24.9699	0.50367	25.3828	0.50907	25.3836	0.49984	25.3828	0.68796
	82.4775	14760.3	82.5995	11324.9	82.569	8131.63	82.5872	5217.08	82.4811	3962.69		24.2755	0.20392	24.1997	0.18612	22.9483	0.1586	25.6413	0.17359	24.1436	0.18782	25.6497	0.20713	24.7031	0.33387	24.4864	0.35406	25.6415	0.33347	24.7206	0.29152	25.6413	0.30404	24.8801	0.29802	25.6418	0.50505	25.648	0.41832	25.6415	0.4391	25.2259	0.50772	25.6421	0.51324	25.6413	0.50358	25.6415	0.69379
	82.6055	14634.8	82.7024	11362.9	82.6655	8122.4	82.7076	5177.32	82.61	3932.26		24.5158	0.20529	24.4376	0.18704	23.1796	0.16017	25.8962	0.17439	24.3814	0.18903	25.9008	0.2085	24.9533	0.33644	24.7266	0.35658	25.8928	0.33581	24.9718	0.29368	25.9002	0.30644	25.1324	0.30013	25.8931	0.50906	25.9056	0.42189	25.8931	0.44268	25.4759	0.51193	25.8931	0.51738	25.9	0.50765	25.8931	0.69989
	82.7208	14622	82.7825	11311.6	82.7904	8110.62	82.8323	5160.71	82.7497	3919.79		24.7615	0.20673	24.6825	0.18837	23.4049	0.16128	26.1549	0.17597	24.6248	0.19045	26.1608	0.20961	25.1956	0.33879	24.9744	0.35908	26.1541	0.33812	25.2158	0.29602	26.1518	0.30809	25.3799	0.30218	26.1544	0.51306	26.1644	0.4254	26.1541	0.44633	25.7286	0.51567	26.1544	0.52159	26.1515	0.51128	26.1538	0.70573
	82.8461	14527.6	82.9344	11260	82.9521	8161.4	82.9634	5118.76	82.8512	3901.1		25.0013	0.20825	24.9238	0.18977	23.6376	0.16254	26.4082	0.17738	24.8665	0.19225	26.4167	0.21152	25.4461	0.34122	25.2178	0.36178	26.4067	0.34063	25.464	0.29797	26.4128	0.31082	25.6282	0.30387	26.4067	0.51727	26.4161	0.42899	26.4067	0.44992	25.9834	0.51961	26.4067	0.52558	26.4126	0.51522	26.4067	0.71194
	82.9737	14462.3	83.1034	11185	83.1382	8028.98	83.0874	5093.31	82.9657	3830.4		25.246	0.20982	25.1648	0.19088	23.8655	0.16372	26.6667	0.17844	25.1065	0.19336	26.6715	0.21272	25.6919	0.3438	25.4624	0.3642	26.6649	0.34296	25.7132	0.3002	26.6651	0.3133	25.8805	0.30608	26.6649	0.52131	26.6772	0.43261	26.6651	0.4533	26.2303	0.52354	26.6654	0.52933	26.6651	0.51933	26.6649	0.71796
	83.1165	14379.8	83.1967	11138.6	83.2488	7994.33	83.2141	5086.52	83.048	3831.43		25.49	0.21149	25.4097	0.19238	24.095	0.16476	26.9239	0.1801	25.3508	0.19509	26.9305	0.21444	25.9377	0.34591	25.7107	0.36701	26.9231	0.34539	25.9574	0.30213	26.9236	0.31546	26.1236	0.30792	26.9233	0.52581	26.9295	0.43621	26.9231	0.45717	26.4876	0.52759	26.9236	0.53347	26.9236	0.52305	26.9233	0.72409
	83.2122	14303.7	83.3265	11092.4	83.39	7959.85	83.2868	5058.5	83.1915	3828.27		25.7289	0.21254	25.6473	0.1937	24.3274	0.16625	27.1777	0.18101	25.5879	0.1963	27.1838	0.21594	26.1884	0.34823	25.9504	0.36961	27.1749	0.34769	26.2071	0.30443	27.1818	0.3179	26.3768	0.30993	27.1749	0.52979	27.188	0.43988	27.1749	0.46065	26.7368	0.53175	27.1749	0.53758	27.1818	0.5271	27.1749	0.73013
	83.3465	14240.5	83.4606	11008.2	83.4681	7909.38	83.428	5013.57	83.3532	3812.41		25.9765	0.21419	25.8935	0.19501	24.5521	0.16729	27.4369	0.18236	25.8335	0.19778	27.4423	0.2174	26.4305	0.35044	26.2	0.37213	27.4362	0.35012	26.4514	0.30658	27.4336	0.31993	26.6234	0.31226	27.4362	0.53392	27.4464	0.44371	27.4359	0.46408	26.9898	0.53553	27.4364	0.54152	27.4331	0.531	27.4359	0.73612
	83.5046	14175.8	83.6114	10936.1	83.5768	7863.72	83.6282	4995.87	83.4439	3795.1		26.2149	0.21581	26.1333	0.19639	24.7857	0.16877	27.6903	0.18343	26.073	0.19924	27.6992	0.21924	26.6815	0.35264	26.4429	0.37459	27.688	0.3525	26.7	0.30842	27.6946	0.3223	26.8727	0.31404	27.688	0.53797	27.6977	0.44725	27.688	0.46787	27.2448	0.53963	27.6882	0.54565	27.6946	0.53484	27.688	0.74249
	83.5754	14084.8	83.7202	10900.1	83.7104	7827.79	83.7637	5001.46	83.6098	3768.76		26.4601	0.21703	26.3753	0.19739	25.0129	0.16974	27.9487	0.18454	26.3142	0.20024	27.9533	0.22031	26.9265	0.35523	26.6872	0.3768	27.9474	0.35458	26.95	0.31067	27.9467	0.32468	27.124	0.31613	27.9472	0.54198	27.9592	0.45088	27.9472	0.47125	27.4922	0.54325	27.9474	0.54949	27.9464	0.53871	27.9472	0.7488
	83.7371	14046.6	83.8722	10917.1	83.8512	7737.87	83.8521	4978.97	83.6923	3756.22		26.7036	0.21863	26.6205	0.19867	25.243	0.17108	28.2062	0.18591	26.5587	0.20196	28.2126	0.22192	27.1736	0.35747	26.935	0.37941	28.2054	0.35723	27.1927	0.31252	28.2059	0.32661	27.3675	0.31818	28.2051	0.54633	28.2108	0.45455	28.2049	0.47521	27.7485	0.54692	28.2051	0.55378	28.2056	0.54234	28.2049	0.75474
	83.8342	13904.9	83.9887	10813.5	83.9843	7721.54	83.9851	4924.33	83.857	3776.01		26.9434	0.22003	26.8569	0.20012	25.4746	0.17235	28.4592	0.18714	26.7949	0.20312	28.4654	0.22337	27.4235	0.35995	27.175	0.38186	28.4574	0.35921	27.4434	0.31451	28.4639	0.329	27.621	0.32026	28.4574	0.5503	28.4708	0.45803	28.4574	0.47856	27.9982	0.55092	28.4577	0.55755	28.4631	0.54651	28.4577	0.76064
	83.9665	13871.7	84.1147	10698.7	84.0968	7699	84.065	4894.19	83.9772	3741.64		27.1886	0.22154	27.1035	0.20137	25.6992	0.17343	28.7205	0.18835	27.0407	0.20442	28.7241	0.22486	27.6656	0.3622	27.4245	0.38427	28.7174	0.36149	27.6881	0.31677	28.7159	0.3309	27.8671	0.32256	28.7174	0.55446	28.7279	0.46186	28.7174	0.48219	28.2505	0.55469	28.7177	0.56154	28.7161	0.54998	28.7172	0.7667
	84.0936	13829.1	84.2657	10549.3	84.222	7647.12	84.2229	4877.75	84.0966	3703.65		27.4289	0.22317	27.3433	0.20275	25.9335	0.17458	28.9715	0.18956	27.2799	0.20604	28.9818	0.22643	27.9154	0.36434	27.6665	0.38685	28.9715	0.36387	27.9363	0.31884	28.9762	0.33312	28.1169	0.32455	28.9713	0.55854	28.9805	0.46524	28.9715	0.48577	28.5057	0.55886	28.9718	0.56581	28.9756	0.55403	28.9718	0.77317
	84.206	13735.8	84.3771	10519.5	84.3776	7563.56	84.3567	4847.62	84.2099	3681.59		27.6734	0.2245	27.5853	0.20385	26.1598	0.17609	29.231	0.1904	27.5211	0.20706	29.2351	0.22773	28.1626	0.36679	27.9113	0.38912	29.229	0.366	28.1853	0.32112	29.23	0.33549	28.3679	0.32674	29.2285	0.56264	29.2403	0.46886	29.2287	0.48913	28.7537	0.56253	29.229	0.5694	29.2297	0.55793	29.2285	0.77942
	84.3673	13666.6	84.4726	10541.3	84.4704	7560.64	84.4751	4830.88	84.3306	3665.87		27.9169	0.226	27.8297	0.20545	26.3904	0.17683	29.488	0.19175	27.7652	0.20864	29.4959	0.2294	28.4074	0.36882	28.1589	0.39183	29.4877	0.36831	28.4288	0.32291	29.4869	0.3374	28.612	0.3287	29.4877	0.56683	29.4946	0.47257	29.4874	0.49277	29.0092	0.56628	29.4877	0.57351	29.4867	0.56151	29.4874	0.78519
	84.4956	13629.3	84.5906	10587.3	84.563	7528.53	84.6214	4806.35	84.4539	3647.17		28.1575	0.22727	28.0674	0.20647	26.6219	0.17816	29.7426	0.19291	28.0023	0.20982	29.7469	0.23086	28.6592	0.37145	28.3988	0.39387	29.7392	0.37046	28.6802	0.32486	29.7462	0.33997	28.8645	0.33072	29.7395	0.57077	29.7515	0.47594	29.7392	0.49628	29.2584	0.57026	29.7395	0.57726	29.7462	0.56546	29.7392	0.79135
	84.6143	13566.9	84.7065	10493.5	84.7172	7491.31	84.7505	4779.77	84.6179	3624.91		28.4031	0.22894	28.3125	0.20772	26.847	0.17904	30.0015	0.19419	28.2469	0.21125	30.0067	0.2321	28.9005	0.37355	28.6476	0.39639	29.9995	0.37259	28.9232	0.32711	29.9982	0.34214	29.1118	0.33309	29.9995	0.57471	30.0108	0.47974	29.9997	0.49966	29.5122	0.57411	29.9997	0.58113	29.9977	0.56918	29.9997	0.79743
	84.7075	13498.1	84.8368	10366.3	84.8466	7460.08	84.8285	4769.61	84.7666	3608.01		28.6427	0.23029	28.554	0.20906	27.0797	0.18053	30.2541	0.19567	28.4881	0.21259	30.2636	0.23367	29.152	0.37563	28.8913	0.39895	30.2533	0.37507	29.1726	0.32879	30.2582	0.34427	29.3599	0.33504	30.2531	0.57882	30.2623	0.48331	30.2531	0.50325	29.7669	0.57831	30.2531	0.58531	30.258	0.57288	30.2531	0.80364
	84.8281	13416.8	84.9575	10319.9	84.9479	7429.25	84.9822	4735.71	84.8903	3587.93		28.8872	0.23123	28.7951	0.21008	27.3076	0.18164	30.5128	0.19649	28.7281	0.21356	30.5179	0.23493	29.3968	0.37801	29.1356	0.40118	30.511	0.37715	29.4213	0.33114	30.5113	0.34654	29.6124	0.33714	30.511	0.58287	30.5228	0.48669	30.511	0.50669	30.0146	0.58219	30.5113	0.58923	30.5113	0.57674	30.511	0.80976
	84.9592	13373.3	85.1028	10263.6	85.0762	7331.31	85.0849	4698.4	85.004	3570.16		29.1312	0.23327	29.0397	0.21146	27.5373	0.18256	30.7695	0.19788	28.9727	0.21486	30.7769	0.23643	29.6438	0.3801	29.3837	0.40379	30.769	0.37957	29.665	0.33302	30.7697	0.3484	29.8559	0.33918	30.7692	0.58751	30.7759	0.49043	30.7692	0.5105	30.2709	0.58616	30.7695	0.59332	30.7692	0.58061	30.769	0.8157
	85.1049	13359	85.2257	10201.9	85.2161	7323.2	85.1959	4688.7	85.1166	3516.9		29.3705	0.23407	29.2776	0.21259	27.7697	0.18378	31.0244	0.19871	29.2093	0.21608	31.0297	0.23787	29.894	0.38257	29.6229	0.40612	31.0208	0.38173	29.9155	0.33504	31.0282	0.35081	30.1092	0.34121	31.0208	0.59137	31.0341	0.4939	31.0208	0.51378	30.5204	0.59001	31.0213	0.59727	31.0274	0.58453	31.021	0.82193
	85.2569	13253.2	85.3652	10158.7	85.3017	7298.46	85.336	4673.5	85.2202	3513.77		29.6174	0.23555	29.5235	0.21369	27.9944	0.18478	31.2831	0.19996	29.4551	0.21749	31.2885	0.23924	30.1361	0.38455	29.8722	0.40855	31.2823	0.38386	30.1604	0.33716	31.2795	0.35283	30.355	0.34333	31.2823	0.59549	31.292	0.49756	31.2821	0.51742	30.7734	0.5937	31.2821	0.60134	31.2795	0.58823	31.2818	0.82829
	85.3709	13148.4	85.4817	10102.8	85.4128	7258.43	85.4309	4649.3	85.3535	3508.82		29.856	0.23716	29.7641	0.21516	28.228	0.1861	31.5367	0.20116	29.6953	0.2191	31.5449	0.24093	30.3871	0.38665	30.1156	0.41118	31.5346	0.38619	30.4086	0.33899	31.5408	0.35501	30.6048	0.34521	31.5346	0.59971	31.5441	0.50109	31.5344	0.52123	31.0279	0.59776	31.5349	0.60543	31.5405	0.59201	31.5346	0.83473
	85.4789	13092.6	85.5873	10026.6	85.5991	7208.57	85.5651	4626.6	85.4524	3495.61		30.101	0.23814	30.0053	0.21616	28.4545	0.18721	31.7946	0.20222	29.936	0.22026	31.7995	0.24208	30.6319	0.38914	30.3604	0.41335	31.7936	0.38817	30.6581	0.34112	31.7933	0.35721	30.8563	0.3472	31.7933	0.60386	31.8049	0.50477	31.7931	0.52465	31.2753	0.60161	31.7938	0.60924	31.7931	0.59602	31.7931	0.84117
	85.5981	13057.9	85.7471	9995.38	85.7613	7178.44	85.702	4603.95	85.5521	3481.7		30.345	0.23995	30.2505	0.21745	28.6844	0.18809	32.0523	0.20356	30.1804	0.22132	32.0585	0.24363	30.8782	0.39104	30.6082	0.4161	32.051	0.39061	30.9008	0.34301	32.0523	0.3591	31.0997	0.34904	32.0515	0.60816	32.0574	0.50855	32.0515	0.52827	31.5326	0.60541	32.0518	0.61332	32.0515	0.59971	32.0515	0.84712
	85.7224	12968.6	85.8975	9976.59	85.8792	7151.81	85.8703	4582.38	85.6919	3457.16		30.585	0.24106	30.4876	0.21862	28.9169	0.18929	32.3059	0.20436	30.4172	0.22269	32.3118	0.24485	31.1287	0.39354	30.8477	0.41846	32.3041	0.39263	31.1517	0.34493	32.3103	0.36152	31.3534	0.35092	32.3041	0.61234	32.3164	0.51208	32.3038	0.5318	31.7806	0.60937	32.3041	0.61712	32.31	0.60386	32.3041	0.85341
	85.8205	12866	85.9817	9902.08	86.0181	7118.69	86.0241	4555.35	85.8648	3442.43		30.8302	0.24224	30.7335	0.21973	29.1409	0.19032	32.5664	0.20572	30.662	0.22387	32.5703	0.24624	31.371	0.39576	31.0972	0.42056	32.5636	0.39493	31.3957	0.34699	32.5626	0.36345	31.5983	0.35319	32.5636	0.61645	32.5746	0.51603	32.5636	0.53547	32.0353	0.61319	32.5636	0.62115	32.5623	0.60751	32.5636	0.85998
	85.9488	12817.2	86.1087	9819.01	86.0885	7061.57	86.1132	4536.54	85.9981	3465.84		31.0703	0.24357	30.9731	0.22126	29.3756	0.19145	32.8182	0.20689	30.902	0.22535	32.8277	0.24773	31.6207	0.39796	31.3394	0.42297	32.8174	0.39708	31.6449	0.34891	32.822	0.36564	31.8485	0.355	32.8174	0.62077	32.8269	0.51952	32.8174	0.53939	32.2888	0.61719	32.818	0.62522	32.8218	0.61127	32.8174	0.86676
	86.0951	12752.6	86.2347	9801.47	86.1863	7044.43	86.2542	4501.16	86.09	3439		31.3146	0.24468	31.2153	0.22206	29.6016	0.19265	33.0777	0.20788	31.1425	0.22625	33.0813	0.24899	31.868	0.40017	31.5843	0.42507	33.0749	0.39907	31.8939	0.35101	33.0761	0.36781	32.0998	0.3573	33.0749	0.62488	33.0867	0.52319	33.0746	0.54284	32.537	0.62071	33.0751	0.62918	33.0761	0.61531	33.0746	0.87274
	86.1875	12697.4	86.3368	9786.56	86.2867	7015.14	86.3691	4419.94	86.2138	3389.46		31.5583	0.24637	31.46	0.22355	29.8327	0.19362	33.3344	0.20901	31.3871	0.22787	33.3421	0.25028	32.1128	0.40216	31.8316	0.42763	33.3338	0.40138	32.1369	0.35286	33.3333	0.36973	32.3436	0.35932	33.3338	0.62922	33.3408	0.52702	33.3336	0.5466	32.7928	0.62446	33.3341	0.63329	33.3333	0.61894	33.3338	0.87867
	86.3253	12585.7	86.4538	9711.04	86.4549	6981.38	86.4844	4432.89	86.3567	3374.91		31.7989	0.24756	31.6979	0.22462	30.0638	0.19494	33.5885	0.21008	31.6244	0.2292	33.5936	0.25148	32.3645	0.4044	32.0723	0.42977	33.5854	0.40335	32.3883	0.35478	33.5928	0.37209	32.5962	0.36135	33.5854	0.63325	33.5979	0.53048	33.5856	0.55002	33.043	0.62855	33.5856	0.63719	33.5923	0.62294	33.5854	0.88509
	86.4603	12534.7	86.558	9621.09	86.5939	6931.86	86.567	4434	86.4871	3359.14		32.044	0.24911	31.943	0.22585	30.2894	0.19573	33.8477	0.21136	31.8685	0.22979	33.8531	0.25274	32.6056	0.40647	32.3203	0.43212	33.8459	0.40556	32.6315	0.35691	33.8441	0.37399	32.844	0.36351	33.8462	0.63741	33.8569	0.53411	33.8459	0.55385	33.2957	0.63233	33.8467	0.64122	33.8438	0.62661	33.8459	0.89157
	86.5678	12494.3	86.6936	9592.44	86.6943	6893.15	86.7025	4456.7	86.5912	3342.25		32.2841	0.25036	32.1841	0.22702	30.5221	0.19676	34.1005	0.21246	32.1095	0.23132	34.1095	0.25425	32.8571	0.40864	32.5642	0.43457	34.099	0.40792	32.8814	0.35873	34.1046	0.37596	33.092	0.36545	34.0987	0.64175	34.1085	0.53777	34.0987	0.55728	33.5505	0.63647	34.099	0.64517	34.1044	0.63033	34.099	0.89797
	86.7616	12428.1	86.8226	9560	86.8374	6876.14	86.8174	4419.09	86.7062	3286.54		32.5283	0.25143	32.4253	0.228	30.7499	0.19808	34.3592	0.21345	32.3497	0.23227	34.3636	0.25547	33.1029	0.41104	32.8081	0.43674	34.3572	0.40985	33.1294	0.3608	34.3574	0.37794	33.3448	0.36748	34.3572	0.64563	34.3692	0.54158	34.3572	0.56065	33.798	0.64042	34.3574	0.64904	34.3574	0.63415	34.3577	0.9042
	86.8771	12312.9	86.9462	9506.02	86.9952	6848.12	86.9348	4375.3	86.8474	3282.18		32.7726	0.25291	32.67	0.22931	30.9794	0.1989	34.6159	0.21475	32.5943	0.23406	34.6228	0.25684	33.3491	0.41309	33.0564	0.43915	34.6156	0.41211	33.3731	0.36241	34.6159	0.38019	33.5876	0.36935	34.6156	0.64976	34.6221	0.54505	34.6159	0.56434	34.0545	0.64433	34.6159	0.65333	34.6156	0.63756	34.6156	0.9106
	86.9675	12277.1	87.1088	9470.57	87.1087	6782.16	87.0339	4362.48	86.9565	3285.26		33.0119	0.25394	32.9074	0.23025	31.2116	0.20026	34.8705	0.21542	32.8311	0.23508	34.8759	0.25821	33.5991	0.41533	33.2964	0.44147	34.8669	0.4142	33.6233	0.36455	34.8741	0.38255	33.8414	0.37134	34.8672	0.65399	34.8803	0.54853	34.8672	0.56778	34.3034	0.64805	34.8674	0.65723	34.8741	0.64131	34.8672	0.91705
	87.1154	12225	87.2365	9415.84	87.2108	6770.1	87.1626	4341.17	87.0876	3309.17		33.2586	0.25516	33.1538	0.23142	31.4365	0.20123	35.1295	0.21674	33.0769	0.23626	35.1346	0.25913	33.841	0.41742	33.5456	0.44358	35.1282	0.41623	33.8685	0.36652	35.1256	0.38459	34.0874	0.37349	35.1285	0.6583	35.1387	0.55223	35.1285	0.57117	34.5577	0.65193	35.1287	0.66128	35.1256	0.64518	35.1285	0.92345
	87.2537	12165.1	87.3638	9369.37	87.3563	6754.48	87.3232	4322.85	87.2251	3284.99		33.4972	0.25664	33.3933	0.2325	31.6703	0.2022	35.3826	0.21774	33.3164	0.23778	35.3913	0.26071	34.0917	0.41927	33.7885	0.44613	35.3803	0.41851	34.1165	0.36824	35.3872	0.38656	34.3367	0.37524	35.3805	0.66247	35.39	0.55566	35.3805	0.57486	34.8117	0.65605	35.3808	0.6655	35.3872	0.64895	35.3805	0.92983
	87.3771	12079.6	87.4796	9411.37	87.4828	6714.97	87.4505	4260.99	87.3453	3233.38		33.7426	0.25749	33.6356	0.23348	31.8966	0.2034	35.641	0.21861	33.5574	0.23855	35.6456	0.26175	34.3372	0.42162	34.0336	0.44829	35.6392	0.42036	34.3654	0.37048	35.6392	0.38864	34.5877	0.37745	35.6392	0.66655	35.6521	0.55923	35.6392	0.57836	35.0592	0.65993	35.6395	0.66908	35.639	0.653	35.6392	0.93614
	87.4937	12041.3	87.6183	9323.01	87.5966	6639.22	87.5457	4273.88	87.4767	3225.28		33.9861	0.25898	33.88	0.23493	32.1272	0.20431	35.8985	0.21995	33.8017	0.23988	35.9046	0.26323	34.5843	0.42346	34.2807	0.45068	35.8972	0.42279	34.6087	0.37229	35.8982	0.39036	34.8313	0.37939	35.8969	0.67093	35.9033	0.56298	35.8969	0.58218	35.3157	0.66369	35.8972	0.67316	35.8977	0.6567	35.8972	0.94265
	87.6212	12000.2	87.7202	9227.93	87.6872	6627.62	87.6995	4287.16	87.6404	3212.68		34.2262	0.26005	34.1177	0.23599	32.3588	0.20556	36.1523	0.22078	34.0386	0.2409	36.1577	0.26457	34.8342	0.4258	34.5204	0.45293	36.1495	0.42471	34.8601	0.37417	36.1556	0.39266	35.0848	0.38133	36.1495	0.67506	36.1623	0.56626	36.1495	0.58587	35.5646	0.66776	36.1497	0.6773	36.1554	0.66084	36.1497	0.94937
	87.7368	11945.7	87.8057	9193.26	87.837	6607.82	87.8715	4249.32	87.7514	3197.01		34.4716	0.26148	34.3638	0.23688	32.5834	0.20662	36.4121	0.22173	34.2839	0.24212	36.4164	0.26564	35.0763	0.42776	34.7697	0.45496	36.4095	0.42683	35.1041	0.37613	36.4082	0.39461	35.3306	0.38344	36.4095	0.67927	36.42	0.57007	36.4095	0.58949	35.8184	0.67151	36.4098	0.68155	36.4079	0.6645	36.4097	0.95613
	87.8127	11893	87.9549	9105.67	87.9373	6565.01	87.9773	4216.26	87.8674	3161.88		34.7117	0.26286	34.6036	0.23821	32.8173	0.20757	36.6644	0.22303	34.5236	0.24341	36.6739	0.26728	35.3266	0.42981	35.0124	0.45762	36.6638	0.42908	35.3533	0.37783	36.6679	0.39681	35.5807	0.38521	36.6638	0.68367	36.6726	0.57365	36.6638	0.59327	36.0724	0.67545	36.6641	0.68574	36.6679	0.66809	36.6638	0.96286
	87.9347	11838.8	88.0922	9019.41	88.0789	6504.65	88.1181	4149.43	87.9935	3152.9		34.9562	0.26366	34.8451	0.23905	33.0435	0.2089	36.9233	0.22388	34.7646	0.24444	36.9274	0.26816	35.5729	0.43205	35.2572	0.45956	36.921	0.43103	35.6017	0.37987	36.9226	0.39887	35.832	0.38727	36.921	0.68778	36.9326	0.57741	36.9208	0.59668	36.3206	0.67928	36.9213	0.68959	36.9223	0.67194	36.9208	0.96937
	88.1059	11795.1	88.226	8988.87	88.2114	6489.07	88.2449	4144.27	88.0937	3145.32		35.2004	0.26529	35.0898	0.24027	33.2746	0.20972	37.1808	0.22508	35.0085	0.24571	37.1874	0.26938	35.8184	0.43398	35.505	0.46178	37.1803	0.43325	35.8447	0.38162	37.1795	0.40069	36.0755	0.38895	37.1803	0.69204	37.1869	0.58128	37.1803	0.60042	36.5761	0.68322	37.1808	0.69387	37.1792	0.67578	37.1803	0.97595
	88.2388	11754.9	88.3479	8981.54	88.3219	6468.08	88.3326	4148.78	88.2043	3132.88		35.4402	0.26615	35.3274	0.24125	33.5064	0.211	37.4349	0.2258	35.2458	0.24676	37.4397	0.27096	36.0696	0.43604	35.7448	0.46396	37.4313	0.43523	36.0961	0.3835	37.439	0.40284	36.3281	0.39107	37.4318	0.69624	37.4438	0.58476	37.4315	0.60406	36.8263	0.68713	37.4315	0.69785	37.439	0.67962	37.4313	0.98258
	88.3591	11678	88.4633	9046.38	88.4681	6437.21	88.4261	4132.9	88.3612	3119.2		35.6859	0.26763	35.5726	0.24241	33.7315	0.21162	37.6938	0.22706	35.4899	0.24794	37.6987	0.27207	36.311	0.43817	35.9933	0.46629	37.6926	0.43738	36.3399	0.38564	37.69	0.40478	36.5754	0.39295	37.6923	0.70045	37.7033	0.58857	37.6926	0.6077	37.0793	0.6911	37.6928	0.70197	37.6897	0.68321	37.6926	0.98931
	88.4524	11644.4	88.5695	8937.76	88.5996	6376.56	88.5742	4115.47	88.4534	3144.76		35.9255	0.26874	35.8136	0.24344	33.9642	0.21268	37.9464	0.22834	35.7311	0.24907	37.9562	0.2738	36.5627	0.44011	36.2369	0.46845	37.9454	0.4395	36.5893	0.38723	37.9513	0.40705	36.8239	0.39463	37.9454	0.70477	37.9544	0.59207	37.9451	0.61143	37.3338	0.69513	37.9454	0.70631	37.951	0.68693	37.9451	0.99619
	88.5841	11647.8	88.7223	8852.8	88.6995	6355.69	88.7397	4094.31	88.5793	3116.87		36.1695	0.26997	36.0549	0.24445	34.1918	0.21405	38.2054	0.22934	35.9713	0.25047	38.21	0.27468	36.8082	0.44243	36.4811	0.47037	38.2033	0.44131	36.838	0.38929	38.2039	0.40923	37.0764	0.3966	38.2033	0.70909	38.2156	0.5958	38.2033	0.61485	37.5815	0.69922	38.2039	0.71029	38.2036	0.69104	38.2033	1.00289
	88.7205	11542.5	88.8374	8802.4	88.7887	6343.79	88.8366	4069.54	88.6897	3072.6		36.4139	0.27132	36.3005	0.24577	34.4213	0.21477	38.4613	0.23059	36.2164	0.25147	38.4695	0.27616	37.054	0.44413	36.7298	0.47283	38.4618	0.44368	37.0812	0.39095	38.4623	0.41098	37.3192	0.39859	38.462	0.71324	38.4682	0.59951	38.4615	0.61861	37.8383	0.70328	38.4618	0.71433	38.462	0.69479	38.4618	1.00956
	88.8773	11461.8	88.9975	8764.46	88.9355	6303.96	88.9673	4054.34	88.8029	3059.03		36.6533	0.27235	36.5374	0.2467	34.6535	0.21612	38.7167	0.23138	36.4525	0.25263	38.7218	0.27716	37.305	0.44621	36.9696	0.47501	38.7133	0.44575	37.3317	0.39283	38.7205	0.41302	37.5733	0.40053	38.7131	0.71762	38.7264	0.60308	38.7133	0.62221	38.0875	0.70749	38.7136	0.71835	38.7203	0.69878	38.7133	1.01634
	88.9572	11405.3	89.1128	8639.52	89.0995	6282.62	89.0855	4035.25	88.9294	3043.4		36.9002	0.27367	36.784	0.24774	34.8786	0.21694	38.9754	0.2323	36.6988	0.25379	38.9808	0.27839	37.5461	0.44828	37.2186	0.47708	38.9741	0.44781	37.5766	0.39468	38.9721	0.41483	37.8188	0.40256	38.9741	0.72179	38.9849	0.6068	38.9741	0.62584	38.3413	0.71122	38.9744	0.7225	38.9718	0.70255	38.9741	1.02322
	89.0772	11348.8	89.2323	8618.28	89.212	6244.48	89.2199	4013.15	89.1077	3021.94		37.1386	0.2749	37.0234	0.24899	35.1118	0.21795	39.229	0.23319	36.938	0.25493	39.2369	0.27972	37.7978	0.45027	37.4612	0.4795	39.2267	0.44975	37.8246	0.39625	39.2328	0.41685	38.0684	0.40426	39.2267	0.72621	39.2364	0.61055	39.2267	0.62954	38.595	0.71513	39.2267	0.72675	39.2326	0.70631	39.2267	1.03
	89.2467	11293.9	89.3576	8627.69	89.3575	6218.96	89.3458	4006.42	89.2416	3011.36		37.384	0.27593	37.2659	0.24986	35.3389	0.21905	39.4867	0.23398	37.1793	0.25583	39.4915	0.28068	38.0428	0.45229	37.7059	0.48157	39.4856	0.45155	38.074	0.39832	39.4854	0.4191	38.3197	0.40629	39.4856	0.73034	39.4972	0.61421	39.4856	0.6331	38.8422	0.71918	39.4859	0.73069	39.4854	0.7103	39.4856	1.03676
	89.3152	11250.5	89.4529	8699.33	89.4805	6259.63	89.4698	3982.4	89.3662	3014.1		37.6275	0.27724	37.5105	0.25127	35.5691	0.21986	39.7446	0.23522	37.4236	0.25709	39.7508	0.28223	38.2894	0.45384	37.9537	0.48389	39.7441	0.45407	38.3173	0.40004	39.7446	0.42091	38.5632	0.40848	39.7436	0.735	39.7497	0.61805	39.7439	0.63716	39.0995	0.72305	39.7439	0.73508	39.7441	0.71407	39.7439	1.04393
	89.4527	11182.8	89.5781	8564.83	89.5771	6207.31	89.6107	3963.91	89.467	2996.37		37.8681	0.27819	37.7475	0.25225	35.8009	0.22097	39.9977	0.23614	37.6604	0.25832	40.0041	0.2833	38.5396	0.45619	38.1936	0.48589	39.9954	0.45591	38.5679	0.40198	40.0026	0.42322	38.817	0.40989	39.9959	0.7393	40.009	0.62164	39.9956	0.64075	39.3485	0.7272	39.9962	0.73926	40.0023	0.71825	39.9956	1.05094
	89.5967	11146.4	89.7272	8474.09	89.7098	6117.36	89.7288	3935.62	89.5901	2952.42		38.1133	0.27929	37.9936	0.25305	36.0255	0.22175	40.2585	0.2374	37.905	0.25924	40.2623	0.28449	38.7814	0.45798	38.4432	0.48808	40.2556	0.45797	38.8122	0.40395	40.2546	0.42505	39.0623	0.4119	40.2554	0.74362	40.2669	0.62565	40.2556	0.64448	39.6022	0.73105	40.2556	0.74361	40.2541	0.72209	40.2556	1.05797
	89.6927	11092.1	89.8236	8438.12	89.873	6015.81	89.8639	3921.58	89.7367	2946.9		38.3534	0.28055	38.2334	0.25422	36.2596	0.22278	40.5105	0.23819	38.1453	0.26055	40.5197	0.28572	39.0317	0.46007	38.6851	0.49048	40.5095	0.46004	39.0611	0.40556	40.5144	0.42715	39.3123	0.41357	40.5095	0.74808	40.5185	0.62934	40.5092	0.6482	39.8562	0.7354	40.5097	0.74785	40.5141	0.72606	40.5095	1.06468
	89.8116	11061.4	89.9746	8414.32	90.0217	6004.32	90.0294	3904.14	89.877	2937.88		38.5976	0.28155	38.4754	0.25502	36.4858	0.22399	40.7698	0.23883	38.386	0.26152	40.7736	0.28685	39.2787	0.46212	38.9302	0.49225	40.7669	0.46191	39.3098	0.40761	40.7682	0.42901	39.5634	0.41561	40.7669	0.75226	40.7787	0.63308	40.7672	0.65189	40.1044	0.73938	40.7677	0.75197	40.7682	0.72992	40.7672	1.07145
	89.9539	10954.9	90.1115	8358.64	90.1386	6030.35	90.0979	3882.82	90.025	2918.81		38.8411	0.28307	38.7196	0.25625	36.7171	0.22491	41.0264	0.23999	38.6301	0.26262	41.0336	0.28816	39.5237	0.46398	39.1778	0.49469	41.0262	0.46411	39.5528	0.40911	41.0259	0.43077	39.8072	0.41728	41.0262	0.75668	41.0328	0.6368	41.0264	0.65591	40.3597	0.74325	41.0264	0.75629	41.0254	0.73382	41.0262	1.07857
	90.0925	10833	90.2424	8291.93	90.2446	6069.59	90.2469	3850.89	90.1471	2902.24		39.0814	0.28409	38.9577	0.25718	36.948	0.22593	41.2813	0.24077	38.8672	0.26356	41.2856	0.2894	39.776	0.46608	39.418	0.49688	41.2779	0.46595	39.804	0.41071	41.2849	0.4329	40.06	0.41928	41.2774	0.76107	41.2903	0.64033	41.2777	0.65959	40.6104	0.74717	41.2779	0.76022	41.2844	0.738	41.2779	1.08576
	90.241	10812.6	90.3948	8262.77	90.3681	6012.97	90.3321	3847.12	90.2764	2888.2		39.3273	0.28533	39.2031	0.25812	37.1736	0.22694	41.5397	0.24187	39.1117	0.26462	41.5451	0.29037	40.0158	0.46786	39.666	0.49905	41.5387	0.46798	40.048	0.41274	41.5364	0.4349	40.307	0.42123	41.539	0.76536	41.5492	0.64417	41.5387	0.66323	40.8627	0.75115	41.539	0.76435	41.5364	0.74169	41.5385	1.09274
	90.3612	10794.5	90.4978	8238.78	90.4924	5940.94	90.4845	3822.74	90.3669	2882.86		39.5669	0.28639	39.4436	0.25921	37.4063	0.22782	41.7931	0.24325	39.3522	0.26604	41.8015	0.29165	40.268	0.4697	39.9104	0.50126	41.7913	0.47012	40.2971	0.41439	41.7974	0.43711	40.556	0.42279	41.7913	0.76998	41.801	0.64785	41.7915	0.66722	41.1177	0.75503	41.7915	0.76875	41.7972	0.74553	41.791	1.09993
	90.5092	10863.4	90.6214	8195.54	90.588	5918.41	90.5909	3809.42	90.5016	2870.66		39.8111	0.28749	39.6849	0.26005	37.6339	0.22926	42.0513	0.24392	39.5932	0.26691	42.0562	0.29272	40.5133	0.47166	40.154	0.50333	42.0492	0.47195	40.5458	0.41647	42.05	0.43895	40.8083	0.42477	42.049	0.77442	42.0618	0.65168	42.049	0.67086	41.3654	0.759	42.0495	0.77267	42.0497	0.74958	42.049	1.10693
	90.6504	10742	90.7499	8131.93	90.702	5889.51	90.6957	3795.36	90.5717	2850.88		40.0551	0.28886	39.9301	0.26134	37.8636	0.22984	42.3079	0.24511	39.8377	0.26827	42.3154	0.29382	40.7591	0.47352	40.4023	0.50572	42.3077	0.47405	40.7891	0.41819	42.3077	0.44064	41.0509	0.42654	42.3079	0.77888	42.3144	0.65547	42.3079	0.67473	41.6219	0.76304	42.3082	0.77692	42.3077	0.75346	42.3074	1.1139
	90.7495	10658.2	90.8538	8100.1	90.8076	5857.98	90.8538	3778.98	90.7097	2841.71		40.2947	0.28984	40.1672	0.26223	38.0958	0.23106	42.5628	0.24566	40.0741	0.26941	42.5682	0.29517	41.0103	0.47593	40.6423	0.50776	42.5592	0.47599	41.0397	0.41996	42.5667	0.44271	41.3049	0.42824	42.5597	0.78324	42.5723	0.65914	42.5592	0.67846	41.8708	0.76713	42.5595	0.78118	42.5662	0.75741	42.5595	1.12109
	90.8606	10611.2	90.9523	8080.14	90.9628	5833.95	90.951	3761.36	90.8299	2826.11		40.5416	0.291	40.4141	0.26333	38.3205	0.23185	42.8218	0.24685	40.3201	0.27046	42.8269	0.296	41.2519	0.47782	40.8916	0.5098	42.821	0.47797	41.2847	0.4218	42.818	0.44441	41.551	0.43017	42.8208	0.7876	42.831	0.66309	42.8208	0.68225	42.1246	0.77102	42.8213	0.78532	42.8177	0.76144	42.8208	1.12839
	90.975	10547.5	91.0929	8034.25	91.0626	5806.2	91.1146	3705.71	90.987	2817.09		40.7797	0.29241	40.6539	0.26433	38.5541	0.23276	43.0749	0.2477	40.5599	0.27164	43.0833	0.29742	41.5029	0.47969	41.1342	0.51229	43.0726	0.47993	41.5329	0.42346	43.0797	0.44624	41.7998	0.43183	43.0726	0.79234	43.0826	0.66674	43.0728	0.686	42.3786	0.77524	43.0726	0.78967	43.079	0.76537	43.0726	1.13574
	91.0937	10517.3	91.2287	7971.71	91.2363	5727.63	91.2488	3711.88	91.0656	2804.21		41.0257	0.29316	40.8954	0.26532	38.7806	0.23385	43.3328	0.2487	40.8006	0.27256	43.3379	0.29836	41.7479	0.482	41.3796	0.51428	43.3321	0.48167	41.7811	0.42559	43.3313	0.44818	42.0518	0.43402	43.3321	0.79671	43.3439	0.67041	43.3321	0.68951	42.6263	0.77909	43.3323	0.79362	43.331	0.76962	43.3318	1.14265
	91.2021	10426.3	91.3264	7940.78	91.2719	5704.27	91.2978	3704.12	91.2031	2784.15		41.2692	0.29449	41.1403	0.26648	39.0117	0.23455	43.5905	0.24975	41.0452	0.27387	43.5974	0.29958	41.9952	0.48377	41.6269	0.51671	43.5895	0.48403	42.0254	0.4272	43.5905	0.44999	42.2951	0.43557	43.5895	0.8014	43.5959	0.67444	43.5892	0.69366	42.8828	0.78315	43.5895	0.79805	43.5903	0.77323	43.5895	1.14975
	91.3314	10279.4	91.4437	7907.76	91.4203	5711.22	91.4404	3733.12	91.3351	2777.63		41.5092	0.29532	41.3777	0.26736	39.243	0.23559	43.8444	0.2506	41.2818	0.27477	43.85	0.30072	42.2452	0.48598	41.8666	0.51907	43.8418	0.48574	42.2758	0.42916	43.8479	0.45213	42.5489	0.43743	43.8418	0.80575	43.8549	0.67822	43.8421	0.69745	43.132	0.78742	43.8418	0.80204	43.8479	0.77731	43.8418	1.15695
	91.4641	10250.6	91.5688	7886.85	91.566	5695.35	91.5787	3676.19	91.4203	2773.74		41.7549	0.29665	41.6234	0.26822	39.4679	0.23646	44.1046	0.25168	41.5271	0.27579	44.1082	0.30175	42.487	0.48791	42.1154	0.52113	44.1015	0.48781	42.5203	0.43116	44.1008	0.45391	42.7944	0.43971	44.1013	0.81017	44.1123	0.68225	44.1015	0.70121	43.3856	0.79126	44.1015	0.8064	44.0997	0.78115	44.1015	1.16409
	91.5938	10263.6	91.6949	7831.1	91.7139	5726.25	91.7025	3656.19	91.6076	2742.68		41.9945	0.29761	41.8637	0.26934	39.7019	0.23737	44.3564	0.25281	41.7669	0.27695	44.3664	0.30307	42.7375	0.4898	42.3583	0.52353	44.3561	0.48988	42.7692	0.43306	44.36	0.45591	43.0447	0.44131	44.3561	0.81465	44.3646	0.68604	44.3561	0.7051	43.6395	0.79545	44.3564	0.81097	44.36	0.78513	44.3556	1.17148
	91.696	10333.3	91.8138	7801.62	91.8607	5632.76	91.8572	3643.42	91.7202	2733.9		42.2387	0.29858	42.1052	0.27025	39.9275	0.23859	44.6159	0.25355	42.0073	0.278	44.6195	0.30402	42.984	0.49209	42.6029	0.52583	44.6133	0.49171	43.0181	0.43504	44.6146	0.45788	43.2955	0.44352	44.6136	0.81888	44.6246	0.68979	44.6131	0.70862	43.8878	0.79958	44.6136	0.81499	44.6144	0.78928	44.6136	1.17892
	91.8421	10262.7	91.9607	7794.06	92.0305	5597.96	91.9596	3621.27	91.838	2685.16		42.483	0.29998	42.3503	0.27138	40.1583	0.23902	44.8726	0.255	42.2524	0.27928	44.8805	0.30511	43.2293	0.49391	42.8509	0.52834	44.8723	0.49378	43.2607	0.43679	44.8718	0.45963	43.5396	0.44525	44.8721	0.82344	44.879	0.69361	44.8726	0.71251	44.1435	0.80372	44.8726	0.81931	44.8718	0.79315	44.8723	1.18633
	91.9419	10138.7	92.0876	7747.17	92.1307	5581.96	92.1104	3561.8	91.965	2688.18		42.7225	0.30095	42.588	0.27245	40.3899	0.24036	45.1272	0.25526	42.4893	0.28017	45.1318	0.30642	43.4811	0.49616	43.0917	0.53026	45.1236	0.49559	43.5123	0.43846	45.131	0.46178	43.7919	0.44722	45.1236	0.82797	45.1364	0.69726	45.1236	0.71617	44.3942	0.80785	45.1241	0.82351	45.1308	0.79726	45.1236	1.1934
	92.0572	10070.1	92.1935	7682.06	92.2282	5554.33	92.2561	3564.56	92.1282	2692.03		42.9687	0.30203	42.8324	0.27321	40.6152	0.24121	45.3859	0.25641	42.7331	0.28102	45.3913	0.30722	43.7214	0.49821	43.339	0.53265	45.3846	0.49767	43.7558	0.44033	45.3823	0.46341	44.0397	0.44892	45.3846	0.83245	45.3951	0.70117	45.3849	0.72013	44.6462	0.8117	45.3851	0.82777	45.3823	0.80119	45.3846	1.20062
	92.2406	10031	92.323	7653.15	92.36	5537.11	92.3754	3565.06	92.2517	2700.12		43.2086	0.30332	43.0734	0.27438	40.8479	0.24216	45.6392	0.25736	42.9741	0.28235	45.648	0.30863	43.9731	0.50006	43.5831	0.53505	45.6374	0.49983	44.0055	0.44225	45.6433	0.46538	44.2875	0.45078	45.6372	0.8369	45.6469	0.70498	45.6374	0.72414	44.9002	0.81601	45.6374	0.83205	45.6431	0.8051	45.6377	1.20808
	92.3711	9981.86	92.4503	7620.4	92.4982	5480.58	92.4919	3587.41	92.3699	2679.42		43.4533	0.30405	43.3142	0.27504	41.0762	0.2431	45.8977	0.25801	43.2138	0.28306	45.9026	0.30915	44.2184	0.50236	43.8275	0.53693	45.8954	0.5017	44.2539	0.44439	45.8959	0.46737	44.5402	0.45293	45.8956	0.8415	45.9077	0.70877	45.8956	0.72788	45.1487	0.82024	45.8959	0.83622	45.8959	0.80922	45.8954	1.21547
	92.4629	9937.75	92.5669	7602.68	92.5903	5473.8	92.5972	3552.78	92.4721	2654.61		43.6965	0.30545	43.5606	0.27632	41.3055	0.24372	46.1544	0.25918	43.4596	0.28436	46.1615	0.31071	44.465	0.50426	44.0755	0.53949	46.1538	0.50391	44.4979	0.44595	46.1544	0.46916	44.7828	0.45486	46.1538	0.84618	46.1605	0.71274	46.1541	0.73202	45.405	0.82437	46.1546	0.84099	46.1538	0.81323	46.1541	1.22296
	92.6021	9904.78	92.7324	7554.22	92.7154	5452.32	92.7377	3514.91	92.6023	2645.08		43.9361	0.30645	43.7972	0.27728	41.5386	0.24492	46.4087	0.26009	43.696	0.28522	46.4149	0.31183	44.7152	0.50648	44.3152	0.54175	46.4054	0.50589	44.7478	0.44775	46.4128	0.47116	45.0368	0.45682	46.4054	0.85083	46.4185	0.71649	46.4056	0.73592	45.6549	0.82849	46.4059	0.84515	46.4126	0.81741	46.4056	1.23062
	92.7292	9777.71	92.874	7514.57	92.8599	5416.54	92.8643	3502.5	92.7696	2635.54		44.183	0.30757	44.0438	0.27808	41.7623	0.24583	46.6677	0.26104	43.9418	0.28629	46.6728	0.31273	44.9565	0.50833	44.5645	0.54405	46.6669	0.50778	44.9926	0.44971	46.6644	0.47294	45.2829	0.45901	46.6669	0.85536	46.6774	0.72043	46.6669	0.73988	45.9079	0.83272	46.6672	0.84947	46.6638	0.82146	46.6669	1.23799
	92.8671	9751.34	92.9991	7480.34	92.9982	5393.04	92.962	3484.79	92.865	2607.18		44.4214	0.30853	44.2837	0.27908	41.9964	0.24687	46.9208	0.26207	44.1815	0.28753	46.9295	0.31414	45.209	0.51039	44.8072	0.54663	46.9192	0.50992	45.2408	0.45151	46.9256	0.47501	45.5319	0.46094	46.919	0.86011	46.9285	0.72435	46.9192	0.74401	46.1627	0.83735	46.9192	0.8538	46.9251	0.82544	46.9192	1.24555
	92.9762	9741.94	93.122	7446.93	93.1252	5365.27	93.0753	3442.47	92.9708	2606.05		44.6668	0.30929	44.5252	0.28002	42.2231	0.24766	47.179	0.2626	44.422	0.28847	47.1841	0.31511	45.4538	0.51283	45.0523	0.5488	47.1785	0.51175	45.4895	0.45366	47.178	0.47712	45.7835	0.46297	47.1782	0.86456	47.19	0.72841	47.1785	0.74796	46.4094	0.84148	47.1785	0.85788	47.1774	0.82978	47.1782	1.25343
	93.1007	9824.52	93.2361	7419.24	93.2259	5347.81	93.1755	3438.49	93.0871	2599.76		44.9105	0.31062	44.7701	0.28128	42.4535	0.24844	47.4364	0.26384	44.6666	0.28957	47.4433	0.31639	45.7001	0.5145	45.3001	0.55132	47.4362	0.51401	45.733	0.4555	47.4369	0.47872	46.0268	0.46462	47.4362	0.86939	47.4426	0.73249	47.4359	0.75204	46.6659	0.84546	47.4364	0.86268	47.4367	0.83392	47.4359	1.26144
	93.1873	9676.77	93.3545	7366.26	93.3447	5320.43	93.333	3430.29	93.1684	2583.16		45.1509	0.31162	45.0073	0.28206	42.6851	0.24951	47.6905	0.26449	44.9032	0.2905	47.6962	0.31724	45.95	0.51676	45.5396	0.55356	47.6879	0.51582	45.9841	0.45762	47.6949	0.48079	46.281	0.46648	47.6882	0.87392	47.701	0.73636	47.6885	0.75593	46.9154	0.84977	47.6885	0.86713	47.6944	0.83843	47.6887	1.26935
	93.3314	9597.94	93.4664	7331.4	93.4817	5279.52	93.536	3461.3	93.3278	2567.78		45.3961	0.31282	45.2543	0.28284	42.9095	0.2502	47.9508	0.26541	45.1492	0.29129	47.9544	0.31828	46.1921	0.51881	45.7888	0.55568	47.9479	0.51786	46.2286	0.45953	47.9469	0.48248	46.5268	0.46855	47.9479	0.87875	47.959	0.7406	47.9477	0.76007	47.1691	0.85402	47.9485	0.87172	47.9469	0.84251	47.9477	1.27695
	93.4247	9560.47	93.6158	7305.87	93.5828	5269.86	93.617	3407.73	93.4817	2558.15		45.6362	0.31415	45.493	0.28404	43.1436	0.25109	48.2021	0.26639	45.3882	0.29259	48.212	0.31959	46.4426	0.52077	46.0312	0.55795	48.202	0.5201	46.4771	0.46122	48.2069	0.48444	46.7761	0.4701	48.202	0.88347	48.2115	0.74453	48.202	0.7643	47.4234	0.8586	48.2023	0.8762	48.2067	0.84685	48.2023	1.28468
	93.5954	9515.63	93.7124	7266.47	93.7003	5246.18	93.7549	3352.31	93.5817	2559.55		45.8804	0.31491	45.7352	0.28473	43.37	0.25209	48.4623	0.26721	45.6292	0.29326	48.4659	0.32054	46.6894	0.52292	46.2761	0.55988	48.4592	0.52217	46.726	0.46328	48.4608	0.48662	47.0277	0.47236	48.459	0.88813	48.471	0.74862	48.4592	0.76828	47.6718	0.86276	48.4597	0.88054	48.4605	0.85111	48.4592	1.2926
	93.7216	9374.08	93.8395	7197.3	93.8112	5226.95	93.8217	3356.33	93.7269	2540.36		46.1243	0.31621	45.9799	0.28597	43.6011	0.25291	48.719	0.26817	45.873	0.29437	48.7259	0.32167	46.9349	0.52484	46.5234	0.56227	48.7182	0.52456	46.9693	0.46512	48.718	0.48854	47.271	0.47423	48.7182	0.89285	48.7254	0.75269	48.7182	0.77247	47.9271	0.86721	48.7187	0.88528	48.7177	0.85531	48.7182	1.30038
	93.8429	9351.47	93.9678	7187.02	93.9028	5187.12	93.9512	3357.47	93.8413	2522.2		46.3644	0.3168	46.2175	0.28671	43.8324	0.25396	48.9733	0.26904	46.1106	0.29528	48.9774	0.32282	47.1867	0.52691	46.7636	0.5644	48.9703	0.52646	47.2204	0.46704	48.9769	0.49062	47.5235	0.47612	48.9697	0.89749	48.9823	0.75661	48.9697	0.77648	48.1773	0.87187	48.97	0.88975	48.9769	0.85966	48.97	1.30813
	93.9906	9368.78	94.0986	7162.14	94.0736	5166.05	94.0868	3387.13	93.9569	2516.8		46.6099	0.31809	46.4629	0.28789	44.0575	0.25475	49.2323	0.27004	46.3547	0.29638	49.2377	0.32376	47.427	0.52902	47.0119	0.56678	49.2308	0.52838	47.4642	0.46912	49.2285	0.49258	47.7711	0.47824	49.2305	0.90234	49.2413	0.76072	49.2308	0.78056	48.4301	0.87619	49.2308	0.89441	49.2285	0.86376	49.2305	1.31618
	94.1324	9420.96	94.17	7122.27	94.2063	5147.49	94.2187	3343.87	94.0819	2500.97		46.8495	0.31924	46.7037	0.28885	44.29	0.2557	49.4849	0.27104	46.5957	0.29728	49.4944	0.32499	47.6785	0.53114	47.2561	0.56913	49.4841	0.53059	47.7133	0.47071	49.4892	0.49471	48.0201	0.48002	49.4838	0.90713	49.4928	0.76467	49.4841	0.78473	48.6841	0.88081	49.4844	0.89928	49.489	0.86814	49.4838	1.32438
	94.2366	9375.31	94.3295	7082.79	94.385	5121.51	94.3553	3315.7	94.1706	2495.5		47.0939	0.32015	46.9455	0.28952	44.5179	0.25684	49.7436	0.27136	46.8364	0.29805	49.7485	0.32599	47.9238	0.53349	47.5002	0.57113	49.7413	0.53254	47.9618	0.47276	49.7428	0.4968	48.2721	0.48214	49.7413	0.91195	49.7536	0.76888	49.7418	0.7889	48.9323	0.88514	49.7418	0.90401	49.7423	0.87262	49.7418	1.33233
	94.3434	9271.72	94.4876	7058.01	94.4891	5083.67	94.4334	3304.95	94.3514	2479.29		47.3381	0.32143	47.1906	0.29063	44.7476	0.25759	50.001	0.27276	47.0812	0.29917	50.008	0.32709	48.1693	0.53526	47.748	0.5735	50	0.53493	48.206	0.47433	50.0005	0.49847	48.5149	0.48393	50.0003	0.91704	50.0072	0.77316	50	0.79331	49.1885	0.88983	50.0003	0.90878	50	0.87697	50	1.34058
	94.4756	9149.14	94.5853	7013.25	94.5604	5069.77	94.5889	3295.34	94.4616	2469.06		47.5775	0.3222	47.4273	0.29126	44.98	0.25862	50.2546	0.27345	47.3171	0.3002	50.2605	0.32819	48.4208	0.5374	47.9884	0.57563	50.2515	0.53682	48.4562	0.47644	50.259	0.50049	48.769	0.48594	50.2515	0.9218	50.2646	0.77732	50.2513	0.79752	49.438	0.89423	50.2518	0.91313	50.2585	0.88137	50.2518	1.34884
	94.6089	9126.99	94.7219	6971.63	94.7043	5050.1	94.6858	3248.96	94.5573	2457.82		47.8244	0.32307	47.6736	0.29214	45.2047	0.25922	50.5144	0.27468	47.5629	0.30097	50.519	0.3288	48.6616	0.53931	48.2375	0.57792	50.5136	0.53894	48.7007	0.47828	50.5102	0.50234	49.0148	0.48794	50.5136	0.92679	50.5231	0.78176	50.5133	0.8019	49.6913	0.89859	50.5138	0.91791	50.51	0.88564	50.5133	1.35709
	94.7353	9115.69	94.8755	6957.68	94.8761	5030.5	94.8163	3248.52	94.6964	2448.24		48.0625	0.3243	47.9137	0.2934	45.4385	0.25995	50.7674	0.27543	47.8026	0.30206	50.7759	0.33009	48.9141	0.54123	48.4804	0.58029	50.7654	0.54108	48.9494	0.47976	50.7721	0.50449	49.2636	0.48963	50.7654	0.93189	50.7744	0.7859	50.7656	0.80639	49.946	0.90319	50.7659	0.92286	50.7721	0.89011	50.7656	1.36566
	94.8372	9145.89	94.987	6876.42	95.011	4987.03	94.9773	3248.32	94.8385	2421.98		48.308	0.32485	48.1559	0.29412	45.6653	0.26108	51.0259	0.27621	48.0441	0.30277	51.03	0.33083	49.1589	0.54383	48.725	0.58243	51.0244	0.543	49.1976	0.48186	51.0244	0.50645	49.5159	0.49183	51.0244	0.93666	51.0367	0.7902	51.0244	0.81067	50.1935	0.90788	51.0246	0.92761	51.0238	0.89478	51.0246	1.37391
	94.9763	9082.63	95.0823	6876.79	95.1051	4969.04	95.0835	3275.96	95.0213	2421.57		48.5515	0.326	48.4006	0.29506	45.8954	0.26176	51.2826	0.27705	48.2884	0.30403	51.2897	0.33215	49.4054	0.54559	48.973	0.58494	51.2823	0.54527	49.4413	0.48367	51.2828	0.50839	49.7584	0.49373	51.2818	0.94159	51.289	0.79476	51.282	0.81514	50.45	0.9122	51.2823	0.9326	51.2826	0.89906	51.282	1.38227
	95.127	8985.02	95.2435	6854.14	95.2479	4951.68	95.1992	3232.83	95.148	2406.26		48.7915	0.32673	48.6375	0.29596	46.127	0.2629	51.5367	0.27775	48.5253	0.30508	51.5426	0.33316	49.6552	0.54772	49.2128	0.58705	51.5341	0.54716	49.692	0.48553	51.5408	0.51073	50.0137	0.49553	51.5339	0.94657	51.5474	0.79891	51.5341	0.81957	50.6992	0.91682	51.5344	0.93705	51.5405	0.90363	51.5341	1.39073
	95.2372	8956.46	95.3743	6851.68	95.3755	4928.28	95.3321	3206	95.2513	2397.54		49.0372	0.328	48.8837	0.29671	46.3518	0.26387	51.7967	0.27864	48.7701	0.306	51.8015	0.33418	49.8975	0.54965	49.4615	0.5892	51.7938	0.54956	49.9367	0.48763	51.7926	0.51268	50.2585	0.49776	51.7936	0.9514	51.8051	0.80326	51.7938	0.82415	50.9527	0.92134	51.7941	0.94189	51.7926	0.90821	51.7938	1.39903
	95.3855	8914.13	95.4647	6764.89	95.496	4890.89	95.498	3197.76	95.3478	2385.78		49.2778	0.32891	49.1235	0.2976	46.5864	0.26451	52.0482	0.2796	49.0099	0.30707	52.0579	0.3353	50.148	0.55169	49.7042	0.59159	52.0482	0.55181	50.1852	0.48922	52.0523	0.51465	50.5083	0.49933	52.0485	0.95649	52.0572	0.8075	52.0485	0.82845	51.2064	0.92618	52.0487	0.94678	52.0523	0.91269	52.0485	1.40745
	95.4874	8872.24	95.5808	6712.57	95.6252	4880.73	95.5997	3178.17	95.4741	2374		49.5213	0.32987	49.3657	0.29844	46.8119	0.26567	52.3079	0.28026	49.251	0.30764	52.3118	0.33602	50.3948	0.55378	49.9493	0.59363	52.3059	0.55363	50.4343	0.49115	52.3072	0.51675	50.7588	0.50131	52.3056	0.96145	52.3169	0.81178	52.3059	0.83245	51.4549	0.93054	52.3062	0.95153	52.3069	0.91726	52.3059	1.41601
	95.5829	8823.51	95.7514	6706.22	95.7662	4856.05	95.737	3147.3	95.6089	2366.62		49.766	0.33096	49.6099	0.29936	47.0435	0.26619	52.5646	0.28145	49.4949	0.30882	52.5723	0.33695	50.6398	0.55575	50.1969	0.59614	52.5646	0.5559	50.6773	0.49285	52.5646	0.51887	51.0031	0.50327	52.5646	0.96664	52.5715	0.81622	52.5646	0.83713	51.7107	0.935	52.5646	0.95632	52.5646	0.92184	52.5644	1.42456
	95.6796	8797.14	95.8948	6675.89	95.8253	4839.99	95.8515	3135.08	95.7352	2324.98		50.0053	0.33187	49.848	0.30017	47.2741	0.2674	52.8192	0.28201	49.7323	0.30961	52.8236	0.33794	50.8915	0.55786	50.4371	0.59806	52.8164	0.55792	50.9283	0.49476	52.8231	0.52104	51.2557	0.50516	52.8164	0.97194	52.829	0.82057	52.8167	0.8414	51.9612	0.93961	52.8167	0.96113	52.8228	0.92659	52.8164	1.43283
	95.8233	8698.34	95.9655	6682.84	95.9414	4798.18	95.9588	3129.96	95.8392	2330.31		50.2517	0.33305	50.0924	0.30109	47.4994	0.26803	53.0785	0.28307	49.9766	0.31057	53.0833	0.33886	51.1321	0.55993	50.6851	0.60017	53.0772	0.55995	51.1718	0.49668	53.0754	0.52283	51.5035	0.50711	53.0772	0.9765	53.0874	0.82507	53.0769	0.84561	52.2134	0.94407	53.0774	0.96579	53.0749	0.93098	53.0772	1.44113
	95.9694	8646.73	96.0921	6608.1	96.0849	4798.93	96.1046	3153.92	95.9343	2328.68		50.4909	0.33372	50.3337	0.30222	47.7321	0.26913	53.3313	0.28406	50.2173	0.31151	53.3405	0.34008	51.3838	0.56175	50.9293	0.60252	53.3297	0.56218	51.4217	0.49825	53.3356	0.52495	51.7513	0.50874	53.3297	0.98185	53.3397	0.82928	53.3295	0.85006	52.4679	0.9489	53.33	0.97076	53.3356	0.9354	53.3297	1.44985
	96.1176	8655.97	96.1983	6577.22	96.2195	4797.02	96.2408	3113.24	96.0939	2318.96		50.7358	0.33457	50.5748	0.30281	47.9607	0.26977	53.59	0.28462	50.4575	0.31219	53.5941	0.34076	51.6294	0.56393	51.1731	0.60468	53.5877	0.56427	51.6704	0.50035	53.5882	0.52678	52.0043	0.51086	53.5877	0.98689	53.6003	0.83359	53.5879	0.85441	52.7159	0.95344	53.5882	0.97561	53.5882	0.94006	53.5877	1.45851
	96.2155	8627.36	96.3511	6554.11	96.3269	4753.54	96.3743	3093.87	96.2751	2307.89		50.9795	0.33576	50.8201	0.30383	48.1899	0.27059	53.8472	0.28586	50.7024	0.31326	53.8536	0.34218	51.8754	0.5657	51.4212	0.60712	53.8462	0.56652	51.9141	0.50196	53.8464	0.5287	52.2471	0.51266	53.8459	0.99213	53.8531	0.83794	53.8462	0.85885	52.9719	0.95814	53.8464	0.98061	53.8464	0.94469	53.8462	1.46712
	96.3034	8652.57	96.5159	6526.06	96.4715	4739.06	96.5037	3080.24	96.3814	2294.27		51.2189	0.33668	51.0575	0.30442	48.4228	0.27152	54.101	0.28639	50.9395	0.31418	54.1069	0.343	52.1259	0.56792	51.6612	0.60929	54.0977	0.56846	52.1641	0.50369	54.1049	0.53088	52.5009	0.51445	54.0977	0.99723	54.1108	0.84205	54.0977	0.8633	53.2219	0.96279	54.0982	0.98555	54.1049	0.94926	54.0979	1.47595
	96.4447	8548.86	96.611	6481.52	96.5891	4718.56	96.6139	3056.77	96.4609	2290.44		51.4655	0.33774	51.3037	0.30525	48.6463	0.2723	54.36	0.28723	51.185	0.31505	54.3651	0.34368	52.3672	0.56997	51.9107	0.61155	54.3595	0.57052	52.4093	0.50557	54.3564	0.53264	52.7467	0.51642	54.3597	1.00208	54.3695	0.84664	54.3597	0.868	53.4753	0.96736	54.3597	0.99049	54.3564	0.9538	54.3595	1.48456
	96.5787	8512.61	96.7113	6455.37	96.7129	4687.28	96.7306	3049.27	96.5717	2299.79		51.7039	0.33896	51.5435	0.30645	48.8806	0.2732	54.6133	0.28801	51.4243	0.3161	54.6223	0.345	52.6192	0.5718	52.1533	0.61392	54.6115	0.57261	52.657	0.50721	54.6185	0.53461	52.9957	0.51815	54.6118	1.00719	54.6208	0.85113	54.6115	0.87266	53.7296	0.97214	54.6123	0.99558	54.618	0.95831	54.6118	1.49328
	96.7156	8473.03	96.81	6438.55	96.8625	4633.5	96.8741	3041.61	96.7408	2282.33		51.9498	0.33971	51.7857	0.30703	49.1069	0.2743	54.871	0.28879	51.6657	0.3168	54.8764	0.3457	52.8642	0.57408	52.398	0.616	54.8697	0.57445	52.9062	0.50929	54.8705	0.53679	53.2475	0.52012	54.87	1.01234	54.8828	0.85549	54.87	0.87702	53.977	0.97688	54.8705	1.00004	54.87	0.96318	54.8703	1.50211
	96.8533	8435.08	96.9643	6408.52	96.9675	4630.42	96.9414	3026.45	96.8818	2261.34		52.1933	0.34096	52.0306	0.30807	49.3375	0.27488	55.1295	0.29003	51.9103	0.31778	55.1351	0.34694	53.1108	0.57588	52.6455	0.61847	55.1279	0.57679	53.1494	0.51105	55.129	0.53855	53.4908	0.52184	55.1282	1.01766	55.1349	0.86014	55.1279	0.88169	54.2333	0.98164	55.1285	1.00509	55.1287	0.96778	55.1279	1.51108
	96.9689	8319.77	97.1032	6381.83	97.0876	4633.84	97.0717	3005.01	96.9753	2247.54		52.4337	0.34175	52.2671	0.3091	49.5695	0.27579	55.3831	0.29061	52.1462	0.31869	55.3887	0.34796	53.3608	0.57813	52.886	0.62077	55.3805	0.57893	53.4006	0.51278	55.3867	0.54073	53.7448	0.52366	55.3805	1.02291	55.3933	0.86442	55.3805	0.88617	54.4825	0.98644	55.3808	1.0101	55.3867	0.97278	55.3803	1.52002
	97.0769	8334.44	97.2121	6290.16	97.2169	4655.45	97.2057	2997.2	97.0553	2242.04		52.6786	0.34287	52.5137	0.30984	49.7942	0.2766	55.6433	0.29146	52.392	0.31954	55.6464	0.34876	53.6028	0.57984	53.1345	0.623	55.6405	0.58116	53.6443	0.5147	55.639	0.54261	53.9904	0.52574	55.6403	1.02797	55.6515	0.86894	55.6403	0.89079	54.7365	0.99061	55.6405	1.01515	55.639	0.97751	55.6403	1.52887
	97.1946	8320	97.3246	6289.59	97.3256	4585.59	97.3183	2985.13	97.1671	2230.26		52.9185	0.34399	52.7533	0.31091	50.0282	0.27722	55.8944	0.29244	52.631	0.32072	55.9046	0.35009	53.8533	0.58193	53.3777	0.62538	55.8946	0.5833	53.8935	0.51639	55.8992	0.54465	54.2402	0.52731	55.8941	1.03327	55.9036	0.87352	55.8944	0.8954	54.9905	0.99571	55.8946	1.02014	55.8987	0.9822	55.8946	1.53777
	97.3194	8340.58	97.4216	6291.62	97.4328	4560.61	97.4762	2971.3	97.2927	2220.05		53.1629	0.34476	52.9955	0.31135	50.2545	0.27833	56.1541	0.29297	52.8724	0.32131	56.1585	0.35074	54.0996	0.58398	53.6223	0.62738	56.1515	0.58518	54.1422	0.51839	56.1531	0.54668	54.4912	0.52949	56.1518	1.03852	56.1633	0.87815	56.1515	0.89984	55.239	1.00044	56.1518	1.02482	56.1531	0.98689	56.1515	1.54642
	97.4878	8277.7	97.4976	6303.86	97.5667	4551.59	97.6119	2951.98	97.4394	2210.75		53.4069	0.34596	53.2399	0.31269	50.4853	0.27884	56.4108	0.29385	53.1168	0.32239	56.4185	0.35162	54.3451	0.58575	53.8696	0.63	56.4108	0.58755	54.3857	0.52007	56.4102	0.54841	54.7348	0.53118	56.4105	1.04368	56.4177	0.88275	56.4108	0.90446	55.4945	1.0051	56.411	1.02994	56.4103	0.99138	56.4108	1.55523
	97.6364	8202.09	97.6172	6254.85	97.714	4544.12	97.7523	2943.77	97.5915	2200.74		53.6475	0.34669	53.4776	0.31325	50.7166	0.28009	56.6651	0.29485	53.3539	0.32307	56.6698	0.35252	54.5966	0.58799	54.1101	0.63213	56.6623	0.58941	54.6366	0.52178	56.6692	0.55058	54.9873	0.53319	56.6626	1.0486	56.6749	0.88716	56.6623	0.9091	55.745	1.00997	56.6626	1.03495	56.6692	0.99615	56.6626	1.56414
	97.7182	8180.72	97.8207	6202.11	97.8587	4516.25	97.8539	2947.1	97.6825	2192.96		53.8931	0.34799	53.7227	0.31416	50.942	0.28075	56.9249	0.29574	53.598	0.3241	56.9295	0.35316	54.8379	0.58992	54.3581	0.63437	56.9231	0.5916	54.8806	0.52366	56.921	0.55219	55.2349	0.53526	56.9228	1.05381	56.9336	0.89161	56.9228	0.9136	55.9972	1.01458	56.9231	1.03983	56.9208	1.00081	56.9231	1.57292
	97.8569	8135.9	97.9599	6173.05	97.9509	4493.48	98.0025	2932.18	97.8344	2184.91		54.1325	0.34897	53.9637	0.31501	51.1747	0.2816	57.1777	0.29658	53.8389	0.32522	57.1862	0.35444	55.0894	0.59198	54.6015	0.63685	57.1762	0.5935	55.1298	0.52533	57.1818	0.55414	55.4832	0.53696	57.1764	1.0593	57.1854	0.89607	57.1762	0.9182	56.2512	1.01958	57.1764	1.04492	57.1813	1.00554	57.1764	1.58219
	97.9539	8096.22	98.112	6143.73	98.081	4477.57	98.1191	2904.43	97.954	2146.7		54.3767	0.34968	54.205	0.31558	51.4028	0.28248	57.4362	0.29701	54.0791	0.32587	57.4405	0.35525	55.335	0.59412	54.8461	0.63895	57.4338	0.59541	55.378	0.52742	57.4351	0.55611	55.7359	0.53891	57.4341	1.06438	57.4462	0.90059	57.4338	0.92279	56.4997	1.02443	57.4341	1.05012	57.4349	1.01044	57.4341	1.59134
	98.0622	8063	98.2419	6092.78	98.2165	4452.82	98.2355	2886.33	98.0956	2149.62		54.6212	0.35076	54.4507	0.31662	51.632	0.28314	57.6928	0.29835	54.3247	0.32686	57.6997	0.35635	55.5805	0.59592	55.0946	0.64157	57.6926	0.59765	55.6215	0.52906	57.6926	0.55809	55.9788	0.54066	57.6926	1.06995	57.6995	0.90528	57.6926	0.92765	56.756	1.02938	57.6928	1.05506	57.6923	1.01529	57.6926	1.60018
	98.2032	8025.95	98.3526	6088.05	98.398	4442.88	98.3461	2877.2	98.2158	2149.93		54.8601	0.3515	54.6876	0.31731	51.8642	0.28421	57.9472	0.2989	54.5608	0.32791	57.9531	0.35713	55.8312	0.59807	55.3339	0.64355	57.9438	0.59954	55.8724	0.53097	57.9513	0.55986	56.2325	0.54237	57.9441	1.07516	57.9569	0.9099	57.9441	0.9323	57.0054	1.03442	57.9444	1.05994	57.951	1.01996	57.9441	1.60943
	98.2899	7995.91	98.4946	6059.97	98.4892	4406.59	98.4691	2853.03	98.3268	2165.46		55.1074	0.3523	54.9337	0.31825	52.0889	0.28488	58.2067	0.29999	54.8066	0.32859	58.2113	0.35793	56.0726	0.6002	55.5836	0.64579	58.2056	0.60143	56.1166	0.533	58.2026	0.56174	56.4783	0.54432	58.2056	1.08056	58.2154	0.91448	58.2054	0.93696	57.2587	1.03905	58.2056	1.06507	58.2023	1.02468	58.2056	1.61857
	98.4649	7960.99	98.598	6024.91	98.6	4349.69	98.6243	2846.99	98.5059	2141.89		55.3453	0.35352	55.1733	0.31909	52.3223	0.28585	58.4597	0.30076	55.0459	0.32966	58.4682	0.35927	56.3245	0.60213	55.8261	0.64818	58.4577	0.60374	56.3653	0.5344	58.4641	0.56355	56.7276	0.54614	58.4579	1.08603	58.4672	0.91888	58.4579	0.94174	57.5132	1.04405	58.4582	1.07044	58.4641	1.02951	58.4579	1.62783
	98.5793	7945.07	98.7271	6006.64	98.7361	4347.16	98.7359	2848.39	98.6504	2120.03		55.591	0.35409	55.4155	0.31995	52.5495	0.28647	58.718	0.3013	55.2868	0.33036	58.7226	0.35998	56.5693	0.6043	56.0712	0.65041	58.7161	0.60555	56.6145	0.53648	58.7167	0.5656	56.9791	0.54814	58.7164	1.09162	58.7287	0.92361	58.7164	0.94641	57.7606	1.049	58.7167	1.0751	58.7167	1.03454	58.7161	1.63741
	98.7233	7889	98.871	5981.37	98.8417	4347.15	98.8318	2833.93	98.7672	2114.29		55.8338	0.35519	55.6604	0.32088	52.7794	0.28724	58.9754	0.30232	55.5316	0.33138	58.9823	0.36107	56.8161	0.60615	56.319	0.65284	58.9744	0.60788	56.8575	0.53812	58.9749	0.56749	57.2222	0.5501	58.9746	1.09725	58.9813	0.92849	58.9744	0.95125	58.0172	1.05372	58.9749	1.08028	58.9749	1.03915	58.9744	1.64687
	98.8003	7857.07	98.9567	5952.5	98.9468	4370.68	98.9694	2806.22	98.8685	2099.36		56.0748	0.35589	55.8976	0.32165	53.0112	0.28833	59.2287	0.30303	55.7683	0.33216	59.2351	0.36182	57.0661	0.60851	56.5589	0.65488	59.2259	0.60991	57.1084	0.54015	59.2333	0.5699	57.4767	0.55185	59.2267	1.10258	59.2395	0.93309	59.2264	0.95597	58.2664	1.05872	59.2264	1.08527	59.2328	1.04436	59.2264	1.65648
	98.9296	7820.15	99.0578	5935.64	99.0905	4314.57	99.0972	2797.69	99.0001	2080.09		56.3198	0.35706	56.1435	0.3223	53.236	0.28912	59.4898	0.30384	56.0133	0.33305	59.4936	0.36253	57.3079	0.61044	56.8077	0.65702	59.4867	0.61219	57.3527	0.54204	59.4849	0.57168	57.7221	0.55403	59.4864	1.10799	59.4974	0.938	59.4864	0.96075	58.5204	1.06339	59.4864	1.09042	59.4846	1.04906	59.4864	1.66576
	99.0916	7787.93	99.2139	5910.9	99.1934	4263.62	99.1813	2795.54	99.1183	2077.22		56.5603	0.35798	56.3835	0.32321	53.4708	0.28993	59.7405	0.3048	56.2526	0.33425	59.7508	0.36364	57.5587	0.61246	57.0501	0.6596	59.7403	0.61426	57.6011	0.54381	59.7451	0.57356	57.9721	0.55574	59.7405	1.11348	59.7495	0.94246	59.7405	0.9656	58.7739	1.06826	59.7405	1.0957	59.7449	1.05387	59.7405	1.67513
	99.225	7757.8	99.3401	5860.12	99.3156	4264.05	99.2981	2782.62	99.2216	2072.94		56.8043	0.35855	56.6253	0.32375	53.6966	0.29107	60.0008	0.3053	56.494	0.33479	60.0041	0.36442	57.8055	0.61462	57.295	0.6616	59.9977	0.61629	57.8503	0.54595	59.999	0.57562	58.2229	0.55776	59.998	1.11888	60.0092	0.94725	59.9977	0.97029	59.0221	1.07302	59.9982	1.10088	59.9987	1.05877	59.9982	1.68467
	99.3689	7735.19	99.4438	5841.05	99.4415	4250.36	99.4869	2768.24	99.3656	2063.19		57.0488	0.35978	56.8697	0.32474	53.9272	0.29164	60.2574	0.30635	56.7381	0.33605	60.2649	0.36553	58.0505	0.61654	57.5423	0.66439	60.2572	0.61869	58.0933	0.54768	60.2564	0.57741	58.4669	0.55946	60.2572	1.12432	60.2633	0.95221	60.2569	0.97523	59.2778	1.0781	60.2572	1.10644	60.2561	1.06362	60.2569	1.69413
	99.4656	7671.49	99.5892	5829.74	99.5531	4274.7	99.5897	2764.98	99.4958	2056.79		57.2879	0.36058	57.1076	0.32552	54.1587	0.29268	60.5121	0.30682	56.9752	0.33668	60.5162	0.36652	58.3022	0.61869	57.783	0.66675	60.5085	0.62072	58.3447	0.54929	60.5156	0.57966	58.7197	0.56155	60.5085	1.12987	60.5208	0.95697	60.5085	0.98005	59.5278	1.08305	60.509	1.11153	60.5156	1.06883	60.5087	1.7039
	99.5996	7664.37	99.6876	5783.59	99.7102	4215.91	99.7063	2769.97	99.5951	2046.36		57.5345	0.3615	57.353	0.32635	54.3839	0.29323	60.7708	0.30787	57.2198	0.33749	60.7759	0.36748	58.5436	0.62053	58.0313	0.66892	60.7695	0.62273	58.5877	0.55151	60.7674	0.58141	58.967	0.56369	60.7695	1.13549	60.7803	0.96167	60.7692	0.98472	59.7811	1.08799	60.7695	1.11664	60.7669	1.07377	60.7692	1.71333
	99.7273	7637.1							99.6871	2029.47		57.7737	0.36242	57.5945	0.32727	54.6163	0.29418	61.0238	0.30851	57.461	0.33847	61.0326	0.36856	58.7945	0.62251	58.2749	0.67079	61.0221	0.6246	58.8371	0.55307	61.0279	0.58344	59.2158	0.56538	61.0223	1.141	61.0315	0.96638	61.0221	0.98944	60.0356	1.09329	61.0226	1.12193	61.0279	1.07867	61.0221	1.72293
												58.0186	0.36331	57.8351	0.32795	54.8449	0.295	61.2818	0.30912	57.701	0.33917	61.2872	0.36906	59.0398	0.62499	58.5193	0.67268	61.2803	0.62669	59.0863	0.55507	61.2808	0.58543	59.4678	0.5675	61.2803	1.14653	61.2923	0.97115	61.2803	0.99425	60.283	1.09806	61.2805	1.12692	61.2805	1.08364	61.28	1.73249
												58.2626	0.36438	58.08	0.32881	55.0744	0.29553	61.539	0.31029	57.9456	0.34019	61.5459	0.37013	59.2868	0.62698	58.7676	0.67523	61.5387	0.62897	59.3296	0.55683	61.539	0.58722	59.7107	0.56946	61.5387	1.15221	61.5451	0.97607	61.539	0.99946	60.5395	1.1034	61.5387	1.13233	61.5387	1.08851	61.5385	1.74209
												58.5019	0.36523	58.3176	0.32971	55.3066	0.29666	61.7931	0.31067	58.1824	0.34074	61.799	0.37108	59.5371	0.62938	59.0068	0.67765	61.7897	0.63101	59.5805	0.55887	61.7969	0.58921	59.9642	0.57142	61.79	1.15802	61.8031	0.98083	61.79	1.00442	60.7888	1.10854	61.7903	1.13776	61.7967	1.09372	61.79	1.75217
												58.7491	0.36622	58.5635	0.33062	55.531	0.29726	62.0528	0.3117	58.4277	0.34169	62.0574	0.37166	59.7789	0.63126	59.2563	0.68071	62.0518	0.63308	59.825	0.56077	62.0487	0.59107	60.2102	0.57351	62.0515	1.16365	62.0615	0.98575	62.0515	1.0093	61.0425	1.11376	62.0515	1.14314	62.0485	1.09869	62.0513	1.76222
												58.987	0.36709	58.804	0.3314	55.7648	0.29801	62.3059	0.3127	58.6677	0.34278	62.3149	0.373	60.0299	0.63341	59.499	0.68331	62.3036	0.63552	60.0737	0.56252	62.3103	0.59315	60.46	0.57526	62.3038	1.16956	62.3131	0.99087	62.3036	1.01435	61.2965	1.11883	62.3038	1.14861	62.3097	1.10379	62.3038	1.77226
												59.2326	0.36789	59.0455	0.3321	55.9915	0.29885	62.5639	0.31323	58.9087	0.34333	62.569	0.37368	60.2747	0.63576	59.7439	0.6854	62.5628	0.63751	60.3226	0.56467	62.562	0.59549	60.7113	0.5775	62.5626	1.17523	62.5746	0.9959	62.5628	1.01916	61.544	1.12397	62.5631	1.15378	62.5623	1.10929	62.5628	1.78232
												59.4761	0.36909	59.2907	0.33296	56.2215	0.29961	62.8215	0.31424	59.153	0.34453	62.8282	0.37465	60.5217	0.63777	59.9917	0.68803	62.8205	0.63993	60.5654	0.56631	62.8215	0.5973	60.9546	0.57941	62.82	1.18117	62.8269	1.00093	62.8203	1.02435	61.8007	1.12898	62.8205	1.15923	62.821	1.11427	62.82	1.79204
												59.7165	0.36963	59.5271	0.33372	56.4533	0.30044	63.0751	0.31489	59.3894	0.34505	63.081	0.37537	60.7715	0.64024	60.2316	0.69051	63.0728	0.64191	60.8165	0.56833	63.079	0.59948	61.2081	0.58102	63.0726	1.18702	63.0856	1.00563	63.0728	1.02948	62.0494	1.13432	63.0731	1.1648	63.079	1.11947	63.0728	1.80237
												59.9616	0.37062	59.7735	0.33432	56.6781	0.3011	63.3359	0.31564	59.635	0.34593	63.3392	0.37607	61.0135	0.64218	60.4804	0.69268	63.3326	0.64412	61.0608	0.5703	63.3315	0.60141	61.4537	0.58321	63.3328	1.19298	63.3436	1.0108	63.3328	1.03465	62.3032	1.13942	63.3331	1.17037	63.331	1.1246	63.3328	1.81296
												60.2017	0.37156	60.0133	0.33557	56.9124	0.30178	63.5869	0.3164	59.8747	0.34693	63.5967	0.37724	61.2638	0.64436	60.7238	0.69501	63.5867	0.64648	61.3092	0.57206	63.5915	0.60357	61.704	0.58499	63.5867	1.19898	63.5956	1.01559	63.5869	1.03996	62.5572	1.14493	63.5869	1.17615	63.591	1.12984	63.5869	1.82338
												60.446	0.37222	60.2555	0.33611	57.1387	0.30272	63.8469	0.31716	60.1157	0.34762	63.85	0.37807	61.511	0.64673	60.9677	0.69725	63.8441	0.64858	61.5586	0.57414	63.8454	0.60583	61.9548	0.58722	63.8441	1.20481	63.8559	1.02082	63.8441	1.04492	62.8056	1.15019	63.8443	1.18187	63.8451	1.13524	63.8441	1.83365
												60.6894	0.37358	60.4997	0.33702	57.3691	0.30351	64.1028	0.31833	60.3595	0.34884	64.1113	0.37898	61.7563	0.64834	61.216	0.69976	64.1031	0.65086	61.8017	0.57576	64.1028	0.60759	62.1993	0.58889	64.1028	1.21063	64.1097	1.02613	64.1028	1.05018	63.0617	1.15553	64.1031	1.18749	64.1028	1.14062	64.1026	1.84364
												60.9303	0.37414	60.7381	0.33767	57.6004	0.3044	64.3577	0.31872	60.5973	0.34934	64.3623	0.37985	62.0066	0.65067	61.4562	0.70197	64.3544	0.65292	62.0528	0.5777	64.3615	0.60968	62.4516	0.59094	64.3544	1.21654	64.3672	1.03113	64.3546	1.05528	63.3116	1.16096	64.3549	1.19284	64.3613	1.14592	64.3549	1.85373
												61.175	0.37517	60.9828	0.33839	57.826	0.30514	64.6167	0.31952	60.8414	0.35005	64.6221	0.3805	62.2492	0.65274	61.7043	0.70423	64.6156	0.65505	62.2966	0.57984	64.6131	0.61143	62.6987	0.5929	64.6156	1.22257	64.6256	1.03616	64.6156	1.06046	63.5641	1.16634	64.6162	1.19853	64.6128	1.15084	64.6154	1.86394
												61.4155	0.37596	61.224	0.3395	58.0587	0.3059	64.87	0.32047	61.0824	0.3511	64.8782	0.38181	62.4996	0.65457	61.9477	0.70663	64.8682	0.6573	62.545	0.58154	64.8744	0.61346	62.9472	0.59469	64.8682	1.22846	64.8779	1.04125	64.8682	1.06577	63.8194	1.17167	64.8682	1.20448	64.8739	1.15601	64.8682	1.87459
												61.6597	0.37661	61.4653	0.34014	58.287	0.30665	65.1282	0.32105	61.3229	0.35174	65.1331	0.38252	62.7457	0.65682	62.1918	0.70902	65.1267	0.65935	62.7942	0.5836	65.1272	0.61567	63.1995	0.59702	65.1269	1.23474	65.1387	1.04631	65.1264	1.07093	64.0663	1.17707	65.1269	1.21	65.1267	1.16147	65.1264	1.88543
												61.9037	0.37772	61.71	0.34125	58.5162	0.30738	65.3851	0.32236	61.5674	0.35281	65.392	0.3835	62.9912	0.65877	62.4403	0.71164	65.3846	0.66164	63.0384	0.58532	65.3854	0.61772	63.4428	0.5988	65.3849	1.24091	65.3915	1.05159	65.3849	1.07642	64.3234	1.18273	65.3851	1.21575	65.3851	1.16695	65.3849	1.89587
												62.1431	0.37847	61.9476	0.34193	58.7487	0.30819	65.639	0.32289	61.8043	0.35359	65.6451	0.38433	63.2422	0.66102	62.6803	0.71419	65.6364	0.66369	63.2883	0.58723	65.6436	0.61986	63.6958	0.60076	65.6364	1.24732	65.6495	1.05693	65.6364	1.08156	64.5721	1.18815	65.6364	1.22148	65.6433	1.1725	65.6362	1.90668
												62.3902	0.37958	62.1937	0.34259	58.9731	0.30891	65.8985	0.32372	62.0496	0.35447	65.9039	0.38489	63.484	0.66327	62.9296	0.71657	65.8974	0.66587	63.5326	0.58938	65.8951	0.62176	63.9426	0.60296	65.8974	1.25347	65.9082	1.06237	65.8977	1.08678	64.8256	1.19374	65.8977	1.22719	65.8949	1.17792	65.8977	1.91742
												62.6286	0.38038	62.4338	0.34363	59.2067	0.30964	66.1515	0.32436	62.2893	0.35542	66.1608	0.38607	63.7352	0.66527	63.1722	0.71907	66.1495	0.66823	63.781	0.59087	66.1561	0.62387	64.1917	0.60472	66.1497	1.25965	66.159	1.06778	66.1497	1.09229	65.0806	1.19931	66.15	1.23298	66.1559	1.18329	66.1495	1.92775
												62.8743	0.38087	62.6756	0.34413	59.4337	0.31077	66.4103	0.32504	62.5301	0.35631	66.4146	0.38682	63.98	0.66759	63.4166	0.72131	66.4085	0.67036	64.0307	0.59319	66.4085	0.62612	64.4432	0.60689	66.4085	1.26583	66.4205	1.07299	66.4087	1.09776	65.3278	1.2051	66.409	1.23883	66.4079	1.18908	66.409	1.93851
												63.1173	0.38201	62.9202	0.34529	59.6638	0.31114	66.6677	0.32596	62.7749	0.35721	66.6741	0.38784	64.2273	0.66946	63.6646	0.72388	66.6672	0.67286	64.2739	0.59521	66.6672	0.62814	64.6868	0.60876	66.6667	1.27214	66.6726	1.07835	66.6667	1.10335	65.5843	1.21005	66.6669	1.24513	66.6672	1.19465	66.6667	1.94978
												63.3574	0.38271	63.1576	0.34588	59.8958	0.31212	66.9208	0.3266	63.0113	0.35798	66.9272	0.38875	64.4771	0.67181	63.9044	0.72621	66.919	0.67483	64.5246	0.59694	66.9257	0.63044	64.9403	0.6108	66.919	1.27839	66.9318	1.08355	66.9192	1.10884	65.8338	1.21648	66.9192	1.25102	66.9249	1.20037	66.919	1.9609
												63.6028	0.38363	63.4035	0.34655	60.1202	0.31262	67.1821	0.32748	63.2568	0.35862	67.1859	0.38947	64.7189	0.67384	64.1541	0.72852	67.179	0.67704	64.7689	0.59904	67.1777	0.63214	65.1859	0.61305	67.1787	1.28458	67.19	1.08908	67.1787	1.11433	66.0868	1.22191	67.179	1.25708	67.1777	1.2058	67.1787	1.97161
												63.8426	0.38452	63.6438	0.3475	60.3545	0.31323	67.4331	0.3283	63.4961	0.35958	67.4433	0.39062	64.9691	0.67597	64.3958	0.73123	67.4326	0.67945	65.0175	0.60088	67.438	0.63426	65.4359	0.61481	67.4328	1.29092	67.4423	1.09438	67.4326	1.11976	66.3415	1.22698	67.4331	1.26299	67.4372	1.21144	67.4328	1.98253
												64.0876	0.38505	63.8853	0.34789	60.5808	0.31411	67.6926	0.32876	63.7373	0.36017	67.6962	0.39128	65.2164	0.67834	64.6409	0.73321	67.6905	0.68161	65.2665	0.60302	67.6915	0.63646	65.6869	0.61713	67.6903	1.29731	67.7018	1.09969	67.6898	1.12504	66.5895	1.23301	67.6903	1.26894	67.6913	1.21715	67.69	1.99375
												64.3311	0.38618	64.1298	0.349	60.8114	0.3147	67.9495	0.32955	63.9811	0.36114	67.9577	0.39196	65.4612	0.68027	64.8882	0.73594	67.9487	0.68409	65.5097	0.60484	67.949	0.63838	65.9307	0.61891	67.9487	1.30383	67.9559	1.1054	67.949	1.13064	66.845	1.23833	67.9492	1.27479	67.9482	1.22272	67.9487	2.00465
												64.5712	0.38706	64.3679	0.3497	61.0427	0.31565	68.2039	0.33021	64.2185	0.36173	68.2085	0.39292	65.7124	0.68242	65.1287	0.73824	68.2005	0.68617	65.7612	0.6067	68.2074	0.64071	66.1835	0.62088	68.2008	1.31017	68.2131	1.1109	68.2003	1.13608	67.0945	1.24412	68.201	1.28042	68.2074	1.22845	68.2005	2.01565
												64.8171	0.38811	64.6128	0.35033	61.2678	0.31633	68.4631	0.33128	64.4625	0.36261	68.468	0.3935	65.954	0.6845	65.3767	0.7407	68.4613	0.68843	66.0039	0.60875	68.4597	0.64255	66.4306	0.62292	68.461	1.31642	68.4715	1.11626	68.4613	1.14157	67.3477	1.24916	68.4613	1.28638	68.459	1.23386	68.4613	2.02684
												65.0567	0.38873	64.8541	0.35119	61.5005	0.31706	68.7159	0.33187	64.7042	0.36362	68.7254	0.39456	66.205	0.68656	65.6206	0.74347	68.7146	0.69065	66.2538	0.61036	68.72	0.64464	66.6789	0.62466	68.7144	1.32286	68.7238	1.12174	68.7146	1.14737	67.6027	1.25507	68.7149	1.29265	68.7195	1.23941	68.7146	2.0379
												65.3009	0.38947	65.0951	0.35181	61.7286	0.3181	68.9744	0.33258	64.9437	0.36416	68.9795	0.39512	66.4508	0.68877	65.8655	0.74559	68.9726	0.69281	66.5023	0.61265	68.9736	0.64691	66.9314	0.62692	68.9726	1.32916	68.9844	1.12723	68.9728	1.1529	67.8504	1.26092	68.9731	1.29837	68.9731	1.24529	68.9731	2.049
												65.5451	0.39073	65.34	0.3529	61.9583	0.31863	69.2308	0.33348	65.1886	0.36523	69.2382	0.39624	66.6973	0.69067	66.1133	0.74814	69.2308	0.69529	66.746	0.61441	69.2313	0.64876	67.1747	0.62883	69.2308	1.33522	69.2377	1.13293	69.2308	1.15858	68.1067	1.26633	69.2313	1.30457	69.231	1.25091	69.2308	2.06018
												65.7845	0.3912	65.5779	0.35363	62.191	0.31952	69.4859	0.33402	65.4259	0.36597	69.4915	0.39708	66.9473	0.69288	66.3528	0.75043	69.4828	0.69757	66.9964	0.61623	69.4895	0.65102	67.4282	0.63071	69.4826	1.34175	69.4959	1.13849	69.4826	1.16414	68.3562	1.27246	69.4828	1.31068	69.4892	1.25685	69.4826	2.07167
												66.0314	0.39207	65.8238	0.35432	62.4152	0.32032	69.7441	0.33484	65.6712	0.36672	69.75	0.39796	67.1896	0.69491	66.602	0.75288	69.7436	0.69987	67.2409	0.61817	69.7413	0.65299	67.674	0.633	69.7436	1.34823	69.7538	1.14417	69.7433	1.16978	68.6092	1.27803	69.7438	1.31671	69.741	1.26254	69.7436	2.08286
												66.2698	0.39324	66.0641	0.35525	62.6493	0.32103	69.9982	0.3356	65.911	0.36769	70.0064	0.39901	67.4408	0.69702	66.8449	0.75537	69.9964	0.70227	67.4896	0.61999	70.0023	0.65517	67.9238	0.63491	69.9959	1.35459	70.0056	1.14958	69.9964	1.17558	68.8634	1.28411	69.9964	1.32303	70.002	1.2683	69.9962	2.09441
												66.5149	0.39392	66.3059	0.35578	62.8755	0.32156	70.2564	0.33618	66.1524	0.36821	70.2613	0.3997	67.6854	0.69933	67.09	0.75764	70.2549	0.70453	67.7388	0.62208	70.2546	0.65745	68.1751	0.63717	70.2551	1.36105	70.2669	1.15522	70.2551	1.18125	69.1109	1.28964	70.2557	1.32902	70.2546	1.27426	70.2549	2.1061
												66.7587	0.39487	66.5507	0.35652	63.1059	0.32225	70.5139	0.33686	66.3963	0.36942	70.5197	0.4006	67.9317	0.70133	67.3376	0.76039	70.5131	0.70705	67.9823	0.62386	70.5139	0.65927	68.4184	0.63912	70.5126	1.36776	70.5192	1.16109	70.5128	1.18715	69.3687	1.2956	70.5133	1.33531	70.5136	1.28006	70.5131	2.11767
												66.9992	0.39551	66.7879	0.35727	63.3379	0.32317	70.7674	0.33764	66.6333	0.36987	70.7736	0.40103	68.1824	0.70387	67.5776	0.76275	70.7654	0.70924	68.2325	0.62582	70.7715	0.66145	68.6724	0.64104	70.7656	1.37406	70.778	1.16671	70.7654	1.1928	69.6166	1.30163	70.7659	1.3414	70.771	1.28607	70.7656	2.12893
												67.2442	0.39654	67.0335	0.35796	63.5619	0.324	71.028	0.33858	66.8782	0.37073	71.0318	0.40176	68.4242	0.70586	67.8266	0.76526	71.0249	0.71154	68.477	0.62803	71.0241	0.66342	68.9177	0.64306	71.0249	1.38049	71.0362	1.17271	71.0251	1.19838	69.8709	1.30704	71.0254	1.34765	71.0241	1.29192	71.0251	2.13997
												67.484	0.3973	67.2736	0.35899	63.7964	0.32448	71.2795	0.33928	67.1179	0.37171	71.289	0.40292	68.6745	0.70815	68.0688	0.76801	71.279	0.71388	68.7259	0.62988	71.2839	0.66558	69.1675	0.6449	71.279	1.38696	71.2885	1.1784	71.2787	1.2043	70.1244	1.31315	71.2792	1.35393	71.2836	1.2977	71.279	2.15125
												67.729	0.39775	67.5156	0.35935	64.0229	0.32543	71.539	0.34005	67.3586	0.37236	71.5426	0.40353	68.9215	0.71026	68.3139	0.77027	71.5362	0.71585	68.9748	0.632	71.5374	0.66785	69.4186	0.64724	71.5359	1.39337	71.5482	1.18384	71.5362	1.20995	70.3728	1.31865	71.5367	1.36002	71.5374	1.30366	71.5364	2.16291
												67.972	0.39901	67.7603	0.36042	64.2535	0.32583	71.7959	0.34101	67.6035	0.37329	71.8033	0.40448	69.1665	0.71226	68.5612	0.77325	71.7954	0.71853	69.2178	0.63402	71.7949	0.67007	69.6626	0.64907	71.7954	1.39989	71.802	1.18948	71.7951	1.21579	70.6286	1.3245	71.7956	1.36624	71.7949	1.30938	71.7956	2.1742
												68.2126	0.3997	67.9984	0.36097	64.4846	0.32705	72.0497	0.34175	67.8405	0.37392	72.0551	0.40532	69.418	0.7145	68.8016	0.77564	72.0467	0.72079	69.469	0.63605	72.0541	0.67228	69.9154	0.65096	72.0469	1.40613	72.0592	1.19522	72.0472	1.22133	70.8788	1.33057	72.0472	1.3724	72.0538	1.31544	72.0469	2.18542
												68.4578	0.40057	68.2433	0.36184	64.7102	0.32762	72.309	0.34265	68.0849	0.37467	72.3144	0.40583	69.6589	0.71675	69.0497	0.77823	72.3077	0.72303	69.7125	0.63816	72.3056	0.67425	70.1627	0.65313	72.3074	1.41237	72.3182	1.20112	72.3074	1.22711	71.1315	1.33661	72.308	1.37853	72.3054	1.32107	72.3077	2.1966
												68.6981	0.40129	68.4841	0.3627	64.9426	0.32843	72.562	0.34324	68.3256	0.37567	72.5713	0.40705	69.9108	0.71907	69.2936	0.78087	72.5603	0.72541	69.9622	0.63995	72.5661	0.67654	70.411	0.65512	72.5603	1.41894	72.57	1.20677	72.5603	1.23296	71.3865	1.34275	72.5605	1.38491	72.5659	1.32685	72.5603	2.20804
												68.9423	0.402	68.7251	0.36334	65.171	0.3291	72.8208	0.34373	68.5658	0.3763	72.8251	0.4077	70.1561	0.72137	69.5379	0.78322	72.819	0.72761	70.2101	0.64216	72.819	0.67867	70.6638	0.6575	72.819	1.42544	72.8305	1.21237	72.819	1.23859	71.634	1.34846	72.8195	1.39123	72.819	1.33269	72.819	2.21955
												69.1868	0.40315	68.97	0.36437	65.4004	0.32989	73.0772	0.34466	68.8102	0.37725	73.0846	0.40866	70.4026	0.72343	69.786	0.78598	73.0772	0.73006	70.4544	0.64409	73.0777	0.6807	70.9061	0.65949	73.0772	1.43203	73.0836	1.21807	73.0772	1.24461	71.89	1.35472	73.0772	1.3975	73.0777	1.33851	73.0772	2.23103
												69.4261	0.40354	69.2074	0.36503	65.6329	0.33074	73.3318	0.34504	69.0475	0.37796	73.3372	0.40963	70.6526	0.72591	70.0262	0.78853	73.3285	0.73234	70.7045	0.64604	73.3356	0.68322	71.1601	0.6616	73.329	1.43873	73.3423	1.22394	73.3285	1.25053	72.1397	1.36055	73.3292	1.40378	73.3354	1.3447	73.3285	2.24348
												69.6725	0.40455	69.4538	0.36548	65.8575	0.33137	73.5913	0.34599	69.2933	0.3787	73.5962	0.41033	70.8945	0.72808	70.2752	0.79097	73.5903	0.73464	70.9493	0.64814	73.5869	0.68506	71.4062	0.66387	73.59	1.44537	73.6003	1.22974	73.5903	1.25659	72.3932	1.36686	73.5905	1.41	73.5872	1.35084	73.5903	2.25519
												69.9112	0.40548	69.6939	0.36621	66.0914	0.33222	73.8441	0.34674	69.5326	0.37938	73.8528	0.41135	71.1452	0.7301	70.5179	0.79376	73.8421	0.73712	71.1972	0.65002	73.849	0.68726	71.6557	0.66568	73.8423	1.45203	73.8518	1.23548	73.8421	1.26279	72.6478	1.37309	73.8426	1.41663	73.8487	1.35649	73.8421	2.26696
												70.1568	0.40592	69.9356	0.36689	66.3179	0.33294	74.1026	0.34745	69.7738	0.38006	74.1069	0.41179	71.3907	0.73256	70.7632	0.79638	74.1005	0.73923	71.4464	0.65231	74.1008	0.68962	71.907	0.66795	74.1008	1.45854	74.1133	1.24133	74.1005	1.26877	72.8949	1.3792	74.1008	1.42301	74.1005	1.36261	74.1008	2.27883
												70.4003	0.40717	70.1803	0.36794	66.5483	0.3335	74.3598	0.34847	70.0179	0.38079	74.3667	0.41261	71.6375	0.73448	71.0105	0.79921	74.359	0.74185	71.6899	0.65422	74.3592	0.69156	72.1498	0.67001	74.359	1.46522	74.3651	1.24741	74.359	1.275	73.1512	1.38545	74.3592	1.42954	74.3592	1.36876	74.359	2.2907
												70.6402	0.40779	70.4177	0.36851	66.7798	0.33425	74.6136	0.34917	70.2545	0.38173	74.6195	0.41364	71.8877	0.73709	71.25	0.80168	74.6113	0.74421	71.9411	0.65641	74.6174	0.69383	72.4038	0.67203	74.611	1.4718	74.6239	1.25334	74.6113	1.28109	73.4004	1.39184	74.6113	1.43599	74.6174	1.37522	74.6113	2.30294
												70.8854	0.40888	70.6641	0.36915	67.0045	0.33501	74.8736	0.34997	70.5003	0.38243	74.8777	0.41431	72.1296	0.73918	71.4995	0.80419	74.8708	0.74663	72.1851	0.65839	74.87	0.69592	72.6492	0.67439	74.871	1.47865	74.8818	1.25944	74.871	1.28707	73.6544	1.39797	74.871	1.44251	74.8695	1.38147	74.871	2.31476
												71.1254	0.40972	70.9041	0.37011	67.2385	0.33583	75.1256	0.35061	70.7398	0.38361	75.1351	0.41544	72.3801	0.74133	71.742	0.807	75.1256	0.74913	72.434	0.66024	75.1298	0.69801	72.8994	0.67632	75.1256	1.48561	75.1346	1.26524	75.1256	1.29332	73.9079	1.40425	75.1256	1.44923	75.1292	1.38727	75.1256	2.32674
												71.3701	0.4104	71.1456	0.37058	67.4643	0.33668	75.3851	0.35094	70.9805	0.38396	75.3887	0.41592	72.6264	0.74379	71.9868	0.8095	75.3828	0.75146	72.6829	0.6626	75.3844	0.69998	73.1507	0.67878	75.3826	1.49239	75.3941	1.27134	75.3823	1.29957	74.1564	1.41049	75.3828	1.45593	75.3841	1.39342	75.3826	2.33883
												71.6141	0.41138	71.3903	0.37153	67.6958	0.33714	75.6418	0.35201	71.2246	0.38487	75.649	0.41681	72.8719	0.74591	72.2344	0.81273	75.6418	0.75409	72.9257	0.66479	75.641	0.7021	73.3945	0.68069	75.6418	1.49912	75.649	1.27754	75.642	1.30582	74.4124	1.41696	75.6423	1.46268	75.6405	1.39963	75.642	2.35074
												71.8542	0.41184	71.6277	0.37213	67.9272	0.33796	75.8967	0.35256	71.4619	0.38535	75.9008	0.41779	73.1236	0.74831	72.4746	0.81494	75.8928	0.75636	73.1776	0.66677	75.9003	0.70467	73.6468	0.68295	75.8931	1.50585	75.9054	1.28364	75.8928	1.31186	74.6619	1.42337	75.8931	1.46934	75.9008	1.40593	75.8931	2.36278
												72.0999	0.41271	71.8729	0.37278	68.1523	0.33863	76.1556	0.35322	71.7058	0.38611	76.1605	0.41822	73.3645	0.75053	72.7224	0.81746	76.1541	0.7589	73.4211	0.66881	76.1518	0.70684	73.8941	0.68507	76.1541	1.51259	76.1651	1.2897	76.1544	1.31801	74.9146	1.4297	76.1544	1.47609	76.1513	1.41195	76.1541	2.37481
												72.3392	0.41328	72.1141	0.37369	68.3852	0.3394	76.4079	0.35403	71.9472	0.38712	76.4169	0.41932	73.6159	0.75262	72.9665	0.8204	76.4067	0.76135	73.6703	0.67068	76.4131	0.70907	74.1427	0.68691	76.4069	1.5196	76.4159	1.29567	76.4067	1.32444	75.1694	1.4362	76.4069	1.48271	76.4123	1.41814	76.4067	2.38727
												72.584	0.41427	72.3552	0.37419	68.6124	0.34041	76.6669	0.35438	72.1874	0.38775	76.6718	0.42003	73.8612	0.75512	73.2104	0.82298	76.6654	0.76358	73.9187	0.67305	76.6651	0.71123	74.3959	0.68922	76.6649	1.52658	76.6774	1.30171	76.6651	1.33082	75.4176	1.44277	76.6651	1.48957	76.6651	1.42475	76.6651	2.40004
												72.8279	0.41541	72.6006	0.37509	68.8425	0.34072	76.9228	0.35546	72.4328	0.38855	76.931	0.42096	74.1075	0.75726	73.4597	0.82582	76.9231	0.76625	74.1625	0.67468	76.9239	0.71326	74.638	0.69146	76.9231	1.53352	76.9295	1.3082	76.9231	1.3372	75.6739	1.44925	76.9236	1.49647	76.9236	1.43111	76.9231	2.41251
												73.0675	0.41594	72.8377	0.37545	69.0747	0.34167	77.1782	0.35594	72.6686	0.38932	77.1836	0.42176	74.3585	0.75963	73.6992	0.82822	77.1744	0.76856	74.4124	0.6767	77.1818	0.71584	74.8923	0.69352	77.1744	1.54055	77.1882	1.31439	77.1746	1.34339	75.9236	1.45623	77.1749	1.5034	77.1815	1.43745	77.1746	2.42499
												73.3139	0.4167	73.0843	0.37628	69.2994	0.34224	77.4366	0.3569	72.9147	0.38998	77.4423	0.42234	74.5995	0.76191	73.9484	0.831	77.4354	0.77108	74.6576	0.67896	77.4333	0.71802	75.1378	0.69575	77.4357	1.54749	77.4461	1.32075	77.4354	1.34971	76.1771	1.46283	77.4359	1.51001	77.433	1.44416	77.4359	2.43734
												73.5526	0.41749	73.3239	0.37719	69.5328	0.34303	77.6905	0.35772	73.1539	0.39083	77.6987	0.42352	74.8511	0.76406	74.1906	0.83374	77.688	0.77379	74.9058	0.68084	77.6944	0.72004	75.3869	0.69748	77.688	1.55478	77.6977	1.32689	77.688	1.35615	76.4313	1.46925	77.6885	1.51698	77.6941	1.45034	77.6882	2.4498
												73.798	0.41815	73.5662	0.37782	69.76	0.34393	77.9482	0.35814	73.3956	0.39134	77.9533	0.42393	75.0958	0.76634	74.4354	0.83621	77.9469	0.77603	75.1548	0.68305	77.9469	0.72244	75.6386	0.69983	77.9472	1.56199	77.9587	1.3332	77.9472	1.36269	76.6782	1.47578	77.9475	1.52393	77.9464	1.45661	77.9469	2.46258
												74.0415	0.41947	73.8105	0.37889	69.9903	0.34446	78.2062	0.35912	73.6397	0.39241	78.2123	0.42491	75.3431	0.76827	74.6835	0.83929	78.2054	0.77865	75.398	0.6852	78.2059	0.72474	75.8822	0.70195	78.2054	1.56911	78.2113	1.33954	78.2054	1.36947	76.9353	1.48224	78.2059	1.53108	78.2057	1.46325	78.2051	2.4754
												74.2823	0.41974	74.0479	0.37942	70.2219	0.34526	78.4597	0.35949	73.8764	0.39318	78.4659	0.42568	75.5931	0.77097	74.9235	0.84206	78.4574	0.78102	75.6487	0.68752	78.4644	0.72732	76.1363	0.70422	78.4574	1.57611	78.4705	1.34599	78.458	1.37601	77.1843	1.48895	78.4575	1.53808	78.4638	1.47008	78.4574	2.4884
												74.5267	0.42054	74.2936	0.38009	70.4466	0.34591	78.72	0.36045	74.1214	0.39374	78.7236	0.42647	75.8347	0.77327	75.1722	0.84453	78.7169	0.78378	75.8929	0.68962	78.7161	0.72945	76.3811	0.70652	78.7169	1.58322	78.7284	1.35277	78.7169	1.38244	77.4378	1.49547	78.7175	1.54511	78.7159	1.47685	78.7167	2.50069
												74.767	0.42126	74.5334	0.38101	70.6804	0.34655	78.9718	0.36126	74.3614	0.39481	78.9816	0.42757	76.0852	0.77565	75.415	0.84729	78.9711	0.78631	76.1423	0.69149	78.9756	0.73189	76.6316	0.70854	78.9715	1.59043	78.9805	1.35927	78.9711	1.38891	77.6915	1.50213	78.9713	1.55204	78.9757	1.48346	78.9713	2.51325
												75.0115	0.42188	74.7754	0.38151	70.9069	0.34771	79.2313	0.36178	74.6018	0.39515	79.2351	0.42812	76.3322	0.77822	75.66	0.84979	79.2282	0.78857	76.3911	0.69369	79.2298	0.73427	76.8829	0.7111	79.2284	1.59746	79.2397	1.36572	79.2287	1.39551	77.9402	1.50895	79.2292	1.55869	79.2295	1.48992	79.2282	2.52617
												75.2553	0.42302	75.0198	0.38254	71.1384	0.34798	79.4877	0.36295	74.8459	0.39618	79.4951	0.42889	76.5775	0.78019	75.9071	0.85287	79.4882	0.79118	76.634	0.69559	79.4871	0.73642	77.126	0.71314	79.488	1.60463	79.4944	1.37227	79.4882	1.402	78.1955	1.51547	79.4877	1.56578	79.4869	1.49635	79.4877	2.53872
												75.4953	0.4234	75.2578	0.38316	71.3692	0.3489	79.7428	0.3633	75.0835	0.39679	79.7472	0.4299	76.8294	0.78256	76.1478	0.85552	79.7395	0.79352	76.885	0.69765	79.7464	0.73881	77.3785	0.71521	79.7395	1.61198	79.7513	1.37875	79.7397	1.40886	78.4459	1.52225	79.7395	1.5727	79.7467	1.50325	79.7397	2.55186
												75.7413	0.42433	75.5036	0.3838	71.5951	0.34957	80.001	0.36426	75.3281	0.39744	80.0066	0.43045	77.0693	0.78491	76.3956	0.85836	80.0003	0.7961	77.1294	0.69986	79.9979	0.74078	77.6265	0.71762	80.0005	1.61916	80.0105	1.3852	80.0003	1.41528	78.6984	1.52904	80.0005	1.57963	79.9977	1.51012	80.0003	2.5646
												75.9809	0.4252	75.7439	0.38458	71.8273	0.35022	80.2541	0.3649	75.5688	0.39849	80.2636	0.43126	77.3215	0.78747	76.6399	0.86129	80.2526	0.79869	77.3782	0.70167	80.2592	0.7431	77.875	0.71964	80.2528	1.6264	80.2626	1.39159	80.2531	1.42198	78.954	1.53587	80.2531	1.58679	80.2587	1.51669	80.2528	2.57741
												76.2251	0.42579	75.9854	0.38495	72.0554	0.35098	80.5131	0.3655	75.8089	0.39912	80.5177	0.4316	77.5671	0.78981	76.8836	0.86377	80.5105	0.80126	77.6263	0.704	80.5115	0.74554	78.1276	0.72195	80.5107	1.63357	80.5236	1.39809	80.5107	1.42849	79.2014	1.54274	80.5108	1.59381	80.5113	1.52328	80.5107	2.59021
												76.4695	0.42664	76.2306	0.38608	72.2844	0.35138	80.7697	0.36652	76.0541	0.40024	80.7766	0.43248	77.8128	0.79195	77.1319	0.86666	80.7692	0.80407	77.8703	0.70596	80.7692	0.74777	78.3702	0.72395	80.7695	1.6406	80.7759	1.40472	80.7692	1.43507	79.4577	1.54959	80.7695	1.60094	80.769	1.52945	80.7692	2.60281
												76.7089	0.4274	76.4673	0.38672	72.5168	0.35252	81.0241	0.36681	76.2902	0.4007	81.0295	0.43325	78.0636	0.79444	77.3719	0.8694	81.0207	0.80654	78.1207	0.70837	81.0279	0.75023	78.6236	0.72619	81.0211	1.64778	81.0338	1.41136	81.0207	1.4419	79.7064	1.55658	81.0213	1.60813	81.0274	1.53612	81.0211	2.61608
												76.9551	0.42824	76.7138	0.38738	72.7417	0.35314	81.2833	0.3678	76.5361	0.40144	81.2887	0.43403	78.3052	0.79667	77.6214	0.87243	81.2823	0.80894	78.3655	0.71041	81.2795	0.75238	78.87	0.72855	81.282	1.65515	81.2921	1.41785	81.2823	1.44888	79.9604	1.56333	81.2831	1.61516	81.2795	1.54312	81.2823	2.62907
												77.1937	0.42908	76.9541	0.38792	72.9751	0.35378	81.5364	0.36841	76.7758	0.40213	81.5451	0.43494	78.5564	0.79897	77.8638	0.8755	81.5341	0.81182	78.6137	0.71226	81.5413	0.75464	79.1188	0.73063	81.5338	1.66263	81.5441	1.42452	81.5341	1.45584	80.2149	1.57028	81.5341	1.62258	81.5407	1.55011	81.5341	2.64224
												77.4396	0.42955	77.1957	0.38854	73.2018	0.35465	81.7946	0.36905	77.0163	0.40287	81.7997	0.4352	78.8017	0.8016	78.1089	0.87789	81.7938	0.81445	78.8621	0.71478	81.7929	0.75713	79.3708	0.73299	81.7936	1.66997	81.8054	1.43129	81.7936	1.46263	80.4618	1.57729	81.7939	1.62961	81.7926	1.55723	81.7936	2.65547
												77.6834	0.43068	77.4406	0.38951	73.4324	0.35496	82.052	0.36981	77.2615	0.40389	82.0589	0.43613	79.0482	0.8038	78.3565	0.8811	82.0511	0.81718	79.1064	0.71685	82.0521	0.75928	79.6141	0.73541	82.0511	1.67745	82.0572	1.43829	82.0513	1.46957	80.7186	1.58417	82.051	1.63694	82.052	1.56412	82.0511	2.66771
												77.923	0.43109	77.6778	0.39015	73.664	0.35607	82.3054	0.37042	77.4977	0.40441	82.3118	0.43694	79.2987	0.80643	78.5962	0.88415	82.3034	0.81965	79.357	0.7192	82.3095	0.76181	79.8682	0.73784	82.3034	1.68473	82.3167	1.44495	82.3034	1.47635	80.9681	1.59125	82.3033	1.64409	82.3095	1.57105	82.3034	2.6811
												78.1688	0.43226	77.9239	0.39078	73.8887	0.35658	82.5664	0.37123	77.7432	0.40511	82.5695	0.43758	79.5403	0.80878	78.845	0.88673	82.5631	0.82227	79.6012	0.72155	82.5618	0.76418	80.1134	0.74018	82.5628	1.69212	82.5741	1.45187	82.5628	1.48327	81.2213	1.59797	82.5631	1.65152	82.5618	1.57796	82.5631	2.69393
												78.408	0.43323	78.1637	0.39182	74.1227	0.35735	82.8177	0.37195	77.983	0.40601	82.8277	0.43864	79.791	0.81114	79.0879	0.89004	82.8177	0.82504	79.8502	0.72349	82.8218	0.76657	80.3635	0.74204	82.8177	1.69949	82.8267	1.45857	82.8177	1.49033	81.4751	1.60498	82.8179	1.65871	82.8215	1.585	82.8174	2.70723
												78.6524	0.43348	78.4054	0.39232	74.3487	0.35817	83.0777	0.3723	78.2234	0.40644	83.0813	0.4391	80.0378	0.81376	79.3328	0.89266	83.0746	0.82738	80.0991	0.72594	83.0764	0.76908	80.6148	0.74454	83.0749	1.70697	83.0861	1.46529	83.0746	1.49737	81.7238	1.61202	83.0751	1.66603	83.0759	1.5918	83.0749	2.72068
												78.8969	0.43471	78.6506	0.39305	74.5796	0.35852	83.3341	0.37322	78.4686	0.40745	83.3418	0.44002	80.2828	0.81602	79.5808	0.89569	83.3346	0.83019	80.3414	0.72814	83.3331	0.77127	80.8583	0.74655	83.3344	1.71418	83.3407	1.47206	83.3344	1.50433	81.979	1.61919	83.3346	1.67325	83.3331	1.59885	83.3341	2.73357
												79.1365	0.43492	78.888	0.39365	74.8111	0.35956	83.5887	0.3736	78.7054	0.40813	83.5931	0.44099	80.5343	0.81869	79.8207	0.8986	83.5854	0.8327	80.5933	0.73029	83.5931	0.7738	81.1109	0.74899	83.5854	1.72149	83.598	1.47914	83.5854	1.51112	82.2298	1.62623	83.5854	1.68039	83.5928	1.60568	83.5854	2.74662
												79.3824	0.43603	79.1332	0.3944	75.0363	0.36	83.8474	0.37478	78.9495	0.40885	83.8531	0.44152	80.7752	0.82107	80.0688	0.9016	83.8464	0.8353	80.8368	0.73258	83.8441	0.77607	81.3584	0.75146	83.8461	1.72873	83.8572	1.48603	83.8461	1.51793	82.482	1.6333	83.8467	1.68767	83.8436	1.61246	83.8461	2.7592
												79.6223	0.43676	79.3742	0.39538	75.2689	0.36084	84.1008	0.37537	79.19	0.40974	84.1093	0.44239	81.0268	0.82363	80.3127	0.90469	84.099	0.83798	81.0863	0.73463	84.1051	0.77841	81.6065	0.75361	84.099	1.73604	84.1084	1.49277	84.099	1.52493	82.7361	1.64043	84.0992	1.69504	84.1046	1.61937	84.099	2.77232
												79.8672	0.43722	79.6149	0.39597	75.497	0.36144	84.3593	0.37563	79.4302	0.41011	84.3643	0.44288	81.2724	0.82627	80.5573	0.90751	84.3569	0.84058	81.3351	0.73688	84.3577	0.78066	81.8595	0.756	84.3564	1.74349	84.369	1.49953	84.3564	1.53195	82.9847	1.64738	84.3572	1.70226	84.3574	1.62643	84.3567	2.78564
												80.1102	0.43828	79.8611	0.39669	75.7267	0.36184	84.6159	0.37673	79.6757	0.41116	84.6226	0.44378	81.5182	0.8285	80.8049	0.91088	84.6154	0.84332	81.5789	0.73907	84.6156	0.78289	82.1018	0.75826	84.6157	1.75115	84.6226	1.50643	84.6157	1.53897	83.2408	1.65462	84.6156	1.70968	84.6151	1.63333	84.6154	2.79871
												80.35	0.43876	80.0975	0.39741	75.9592	0.36285	84.8703	0.37719	79.9119	0.41184	84.8762	0.44468	81.769	0.83134	81.0449	0.91385	84.8672	0.84581	81.8286	0.74134	84.8741	0.78539	82.3555	0.76067	84.8672	1.75879	84.88	1.51327	84.8672	1.54616	83.4905	1.66203	84.8675	1.71741	84.8741	1.64045	84.8669	2.81213
												80.5967	0.4398	80.3441	0.39788	76.1834	0.36326	85.1293	0.37807	80.1581	0.41241	85.1346	0.4451	82.01	0.83384	81.2939	0.91676	85.1287	0.84848	82.0741	0.74378	85.1259	0.78783	82.6019	0.76329	85.1284	1.7662	85.1387	1.52018	85.1284	1.55354	83.744	1.66947	85.1287	1.72478	85.1254	1.64756	85.1287	2.825
												80.8354	0.44066	80.5837	0.39878	76.4177	0.36399	85.3823	0.37884	80.3974	0.41342	85.3916	0.44613	82.2625	0.8362	81.5367	0.92011	85.3807	0.85152	82.322	0.74585	85.3872	0.79048	82.8507	0.76545	85.3805	1.77373	85.39	1.52729	85.3803	1.56065	83.998	1.67667	85.381	1.73233	85.3872	1.65471	85.3803	2.83792
												81.0808	0.44103	80.8257	0.39925	76.6439	0.36474	85.6408	0.37937	80.6384	0.41381	85.6456	0.44669	82.5071	0.83897	81.7814	0.92294	85.6395	0.85405	82.5704	0.74849	85.6392	0.79294	83.1025	0.76801	85.6395	1.78124	85.6518	1.53437	85.6395	1.56754	84.2452	1.68402	85.6398	1.73969	85.639	1.66183	85.6397	2.85118
												81.3245	0.44219	81.0704	0.39998	76.8748	0.36531	85.8982	0.38036	80.8824	0.41481	85.9049	0.44749	82.7535	0.84137	82.0294	0.92607	85.8977	0.85708	82.8142	0.75084	85.8982	0.79527	83.3458	0.77043	85.8974	1.78892	85.9036	1.54142	85.8974	1.57499	84.5022	1.69118	85.8979	1.74732	85.8982	1.66879	85.8974	2.86461
												81.5653	0.4426	81.3078	0.40073	77.1061	0.36632	86.152	0.38075	81.1196	0.41543	86.1577	0.44817	83.0036	0.84423	82.2691	0.92916	86.1497	0.85962	83.0653	0.75329	86.1564	0.79794	83.6005	0.77263	86.1495	1.79675	86.1628	1.54844	86.1497	1.58243	84.7514	1.69823	86.15	1.75487	86.1557	1.6761	86.15	2.87806
												81.8098	0.44356	81.5544	0.40117	77.3308	0.36688	86.412	0.38178	81.3651	0.41601	86.4162	0.44881	83.2456	0.84696	82.5182	0.93218	86.4095	0.86237	83.3091	0.75577	86.4087	0.80009	83.8453	0.77548	86.4095	1.80443	86.4205	1.55568	86.4092	1.58965	85.0049	1.70546	86.4098	1.7625	86.4082	1.68321	86.4095	2.89138
												82.0498	0.44412	81.7937	0.40228	77.5643	0.36738	86.6639	0.38235	81.6044	0.41684	86.6739	0.44999	83.4956	0.84966	82.7611	0.93544	86.6638	0.86525	83.5581	0.75791	86.6682	0.80286	84.0957	0.77782	86.6636	1.81188	86.6731	1.56302	86.6636	1.59693	85.2592	1.71324	86.6638	1.77025	86.668	1.69061	86.6638	2.90451
												82.2943	0.44493	82.0357	0.40278	77.7908	0.36846	86.9236	0.38278	81.8454	0.41739	86.9274	0.45046	83.7426	0.8522	83.0055	0.93835	86.921	0.86798	83.8072	0.76035	86.9225	0.80544	84.3467	0.78058	86.9207	1.81943	86.9326	1.57031	86.9207	1.60409	85.5074	1.72057	86.9213	1.77786	86.922	1.69798	86.9207	2.91781
												82.5385	0.44582	82.2797	0.40379	78.0221	0.36898	87.1805	0.38369	82.0892	0.41836	87.1874	0.45111	83.9885	0.85486	83.253	0.94183	87.1797	0.87102	84.05	0.76273	87.1795	0.80767	84.59	0.78273	87.18	1.82691	87.1869	1.57731	87.18	1.61145	85.7626	1.72786	87.1802	1.78552	87.179	1.70509	87.18	2.93073
												82.7781	0.44652	82.5178	0.40431	78.2535	0.3698	87.4349	0.38404	82.3265	0.41888	87.439	0.452	84.2401	0.85778	83.4935	0.94475	87.4318	0.8737	84.3014	0.76507	87.4385	0.81025	84.8428	0.78516	87.4318	1.83466	87.4438	1.58439	87.4313	1.61863	86.0134	1.73553	87.4318	1.7933	87.4387	1.71244	87.4315	2.94394
												83.0236	0.44715	82.7629	0.40491	78.4788	0.37022	87.6939	0.38507	82.5708	0.4195	87.6989	0.45258	84.4802	0.86058	83.7412	0.94789	87.692	0.87645	84.5454	0.76774	87.6902	0.8127	85.0901	0.78791	87.692	1.84245	87.7028	1.59137	87.692	1.62617	86.2658	1.74316	87.6923	1.80101	87.69	1.71974	87.6918	2.95723
												83.2631	0.44788	83.0042	0.40575	78.7113	0.37104	87.9462	0.38561	82.8123	0.4204	87.9559	0.45359	84.732	0.86328	83.9859	0.95129	87.9457	0.87935	84.7943	0.76998	87.9505	0.81539	85.3391	0.79037	87.9457	1.85028	87.9549	1.59852	87.9454	1.63385	86.5199	1.75082	87.9459	1.80883	87.9503	1.72703	87.9457	2.97032
												83.5076	0.44834	83.2457	0.40601	78.9389	0.37182	88.2049	0.38611	83.0525	0.42079	88.21	0.45413	84.9771	0.86585	84.2303	0.95433	88.2034	0.88216	85.043	0.77264	88.2044	0.81796	85.5914	0.793	88.2031	1.85791	88.2149	1.60597	88.2031	1.64136	86.7681	1.75856	88.2033	1.81658	88.2038	1.73419	88.2031	2.98389
												83.7523	0.44944	83.4909	0.40688	79.1686	0.37208	88.4626	0.38749	83.2976	0.42166	88.4695	0.45494	85.2233	0.86831	84.4773	0.95761	88.4615	0.88513	85.2865	0.7748	88.4621	0.82023	85.8342	0.79559	88.4615	1.86573	88.4684	1.61321	88.4615	1.64888	87.0244	1.76656	88.4621	1.82452	88.4615	1.74135	88.4613	2.9971
												83.9912	0.45007	83.7275	0.40733	79.4013	0.37307	88.7159	0.38759	83.5332	0.42224	88.7218	0.45563	85.474	0.87127	84.7183	0.96076	88.713	0.88782	85.5367	0.77745	88.7202	0.82288	86.088	0.79833	88.713	1.87365	88.7264	1.62043	88.713	1.65659	87.2741	1.77439	88.7133	1.83241	88.72	1.74902	88.7134	3.0109
												84.2386	0.45062	83.9739	0.40791	79.6257	0.37387	88.9756	0.38837	83.779	0.42296	88.9805	0.45584	85.7154	0.87407	84.9671	0.96413	88.9749	0.89083	85.7822	0.78009	88.9718	0.82542	86.3335	0.80087	88.9749	1.88132	88.9849	1.62796	88.9751	1.66406	87.5273	1.78205	88.9754	1.84033	88.9713	1.75683	88.9749	3.02445
												84.4768	0.45167	84.214	0.40853	79.8598	0.37462	89.2289	0.38905	84.0185	0.42357	89.2379	0.45727	85.9679	0.87664	85.2097	0.96757	89.2269	0.89405	86.0301	0.78238	89.2339	0.82812	86.5826	0.80307	89.2269	1.88941	89.2364	1.63551	89.2269	1.6718	87.7821	1.78991	89.2275	1.84877	89.2334	1.76439	89.2269	3.03847
												84.7219	0.45206	84.4562	0.40924	80.0858	0.37552	89.4874	0.38971	84.2602	0.42445	89.4916	0.45765	86.2124	0.87961	85.4548	0.97071	89.4857	0.89675	86.2788	0.78506	89.4856	0.83099	86.8346	0.80589	89.4859	1.89751	89.498	1.64302	89.4857	1.67945	88.0293	1.79797	89.4861	1.85669	89.4851	1.77212	89.4859	3.05266
												84.9651	0.4532	84.7011	0.41022	80.3162	0.37571	89.7443	0.39056	84.5048	0.42513	89.751	0.45872	86.4594	0.88223	85.7026	0.97407	89.7436	0.8999	86.5223	0.78732	89.7446	0.83329	87.0777	0.80835	89.7434	1.90558	89.7503	1.65095	89.7436	1.68757	88.2858	1.80567	89.7438	1.86486	89.7444	1.77987	89.7436	3.06618
												85.2058	0.45381	84.9378	0.41076	80.5482	0.37687	89.9977	0.39127	84.7409	0.42584	90.0041	0.45914	86.7089	0.8854	85.9424	0.97733	89.9954	0.90283	86.773	0.79016	90.0023	0.83629	87.3324	0.8109	89.9957	1.91357	90.0087	1.65853	89.9954	1.69562	88.535	1.81369	89.9956	1.87301	90.002	1.78767	89.9951	3.08007
												85.4514	0.45453	85.1839	0.41149	80.7727	0.37741	90.2585	0.39218	84.9865	0.42623	90.2628	0.45979	86.951	0.88807	86.1911	0.98057	90.2551	0.90585	87.0174	0.79282	90.2544	0.83894	87.5775	0.81385	90.2551	1.92155	90.2667	1.66623	90.2551	1.70322	88.7885	1.8216	90.2556	1.88113	90.2538	1.79535	90.2554	3.09346
												85.6915	0.45539	85.4237	0.41228	81.0071	0.37801	90.5097	0.39253	85.2258	0.42741	90.52	0.46068	87.2012	0.89064	86.4338	0.98391	90.5095	0.90889	87.2659	0.79501	90.5139	0.8417	87.8273	0.81618	90.5097	1.92955	90.5184	1.67385	90.5097	1.71113	89.0422	1.82958	90.5102	1.88921	90.5136	1.80296	90.5097	3.10718
												85.9357	0.45584	85.6658	0.41272	81.2325	0.3788	90.7697	0.39325	85.4665	0.42784	90.7731	0.46139	87.4485	0.89368	86.6789	0.98676	90.7674	0.91167	87.5153	0.79764	90.7682	0.84444	88.0784	0.81909	90.7674	1.93738	90.7787	1.68128	90.7672	1.7191	89.291	1.83728	90.7675	1.89744	90.7682	1.81055	90.7674	3.12105
												86.1802	0.45698	85.9101	0.41369	81.464	0.37924	91.0264	0.39424	85.7108	0.42861	91.0339	0.46208	87.6933	0.8964	86.9262	0.99043	91.0261	0.91491	87.7583	0.80013	91.0259	0.84688	88.3221	0.82179	91.0261	1.94527	91.0326	1.68894	91.0264	1.72702	89.5462	1.84511	91.0267	1.9058	91.0259	1.81832	91.0259	3.13477
												86.4195	0.45719	86.1475	0.41439	81.6954	0.38018	91.281	0.39435	85.9479	0.42938	91.2851	0.46275	87.945	0.89922	87.1669	0.99332	91.2777	0.91769	88.0093	0.80261	91.2849	0.84975	88.5747	0.82444	91.2777	1.95339	91.2905	1.69693	91.2782	1.73504	89.797	1.85331	91.2782	1.91393	91.2846	1.82621	91.278	3.14869
												86.6657	0.45824	86.3929	0.41496	81.9205	0.38046	91.5395	0.39524	86.1924	0.43002	91.5451	0.46307	88.1856	0.90198	87.4152	0.99635	91.5387	0.92086	88.253	0.80518	91.5367	0.85239	88.8225	0.82701	91.539	1.96132	91.549	1.7049	91.5384	1.74292	90.0494	1.86135	91.5392	1.92227	91.5364	1.83402	91.5387	3.162
												86.9046	0.4589	86.6343	0.41571	82.1534	0.38149	91.7931	0.39584	86.4334	0.43098	91.802	0.46427	88.4376	0.90463	87.6586	0.99967	91.7913	0.92407	88.5024	0.80757	91.7975	0.8552	89.0705	0.82962	91.791	1.96923	91.8011	1.71256	91.7913	1.75103	90.304	1.86941	91.7915	1.93065	91.7972	1.84181	91.7915	3.17555
												87.15	0.4595	86.8748	0.41632	82.3815	0.3821	92.0513	0.39643	86.6737	0.43143	92.0564	0.46498	88.6826	0.90728	87.9027	1.00289	92.049	0.92706	88.7513	0.81031	92.05	0.85804	89.3233	0.83253	92.049	1.97715	92.0618	1.72024	92.0492	1.75883	90.5519	1.87773	92.0495	1.93892	92.05	1.84958	92.0492	3.18929
												87.3932	0.46042	87.12	0.41694	82.611	0.38265	92.3087	0.39733	86.9187	0.43231	92.3151	0.46575	88.9294	0.90985	88.1506	1.00627	92.308	0.93025	88.9951	0.81266	92.3077	0.86062	89.5659	0.83514	92.3074	1.98519	92.3149	1.72829	92.308	1.76686	90.808	1.88594	92.3082	1.94745	92.3077	1.85739	92.308	3.20309
												87.6328	0.46118	87.3578	0.41751	82.8438	0.38344	92.5626	0.39797	87.1554	0.43311	92.5685	0.46636	89.1794	0.91287	88.3905	1.0096	92.5592	0.93317	89.2452	0.81535	92.5664	0.86368	89.8199	0.83772	92.5597	1.99354	92.5721	1.73611	92.5592	1.77496	91.0577	1.89419	92.56	1.95601	92.5664	1.8653	92.5595	3.21756
												87.8793	0.46211	87.6039	0.41812	83.0676	0.38404	92.8213	0.39896	87.4009	0.43376	92.8266	0.46672	89.4207	0.91567	88.6402	1.01281	92.8213	0.93615	89.49	0.818	92.8182	0.86652	90.0654	0.84036	92.821	2.00194	92.8311	1.744	92.8213	1.78306	91.3112	1.90236	92.8213	1.96451	92.8182	1.87338	92.8213	3.23141
												88.1179	0.46294	87.844	0.41913	83.3014	0.38446	93.0746	0.39931	87.6404	0.4348	93.0843	0.46787	89.6727	0.91845	88.8827	1.01623	93.073	0.93943	89.7382	0.82032	93.0798	0.86924	90.3147	0.84286	93.0734	2.01036	93.0826	1.75199	93.0734	1.79134	91.5657	1.91063	93.0738	1.9733	93.0797	1.8813	93.073	3.24533
												88.3636	0.46344	88.0865	0.41967	83.5281	0.38572	93.3328	0.40008	87.8819	0.43513	93.3382	0.46828	89.9178	0.92131	89.128	1.01926	93.3318	0.94238	89.9869	0.82309	93.3315	0.87213	90.5668	0.8457	93.332	2.01851	93.3444	1.75984	93.3318	1.79956	91.8131	1.91882	93.3318	1.9818	93.3318	1.88918	93.3313	3.25935
												88.6073	0.46442	88.3307	0.42063	83.7585	0.38593	93.5908	0.40096	88.1264	0.436	93.5966	0.46937	90.1642	0.92378	89.3748	1.02274	93.59	0.94546	90.2304	0.82546	93.5905	0.87469	90.8098	0.84818	93.59	2.02676	93.5964	1.76784	93.59	1.80771	92.0691	1.92684	93.59	1.99042	93.5905	1.89704	93.5897	3.27292
												88.8474	0.46478	88.5673	0.42103	83.9903	0.38694	93.8441	0.40167	88.3625	0.43662	93.85	0.47001	90.4145	0.9268	89.6153	1.02586	93.8421	0.94847	90.4815	0.82785	93.8485	0.87773	91.0639	0.85069	93.8418	2.03501	93.8549	1.77565	93.8418	1.81611	92.3186	1.93484	93.8421	1.99892	93.8482	1.90499	93.8421	3.2871
												89.0926	0.46579	88.8137	0.42164	84.2152	0.38747	94.1049	0.402	88.6081	0.43737	94.1082	0.47079	90.6566	0.92975	89.8641	1.02917	94.1018	0.95182	90.7255	0.83057	94.1008	0.88053	91.3091	0.85371	94.1021	2.04308	94.1131	1.78382	94.1018	1.82436	92.5721	1.94273	94.1021	2.00742	94.1003	1.91348	94.1018	3.30133
												89.3324	0.46637	89.0535	0.42268	84.4488	0.38823	94.3559	0.40299	88.8474	0.43814	94.3662	0.4716	90.9066	0.93254	90.1068	1.03275	94.3561	0.95503	90.9745	0.8329	94.3605	0.88368	91.5589	0.85621	94.3559	2.05124	94.3649	1.79185	94.3561	1.83253	92.8263	1.95117	94.3561	2.01603	94.3603	1.9214	94.3564	3.31511
												89.5771	0.46713	89.2958	0.42302	84.6753	0.38897	94.6159	0.4034	89.0886	0.43862	94.6195	0.47204	91.1534	0.93551	90.3518	1.03573	94.6134	0.95786	91.2232	0.83561	94.6149	0.88632	91.8105	0.85916	94.6136	2.05925	94.6249	1.79998	94.6136	1.84061	93.0748	1.95969	94.6136	2.02466	94.6144	1.92924	94.6134	3.32877
												89.8213	0.46807	89.5402	0.42391	84.9061	0.38932	94.872	0.40426	89.3327	0.43963	94.8803	0.4727	91.3987	0.9381	90.5992	1.03913	94.8726	0.96098	91.4669	0.83829	94.8721	0.8889	92.054	0.86184	94.8723	2.06704	94.879	1.80804	94.8723	1.8484	93.3308	1.96779	94.8723	2.03309	94.8718	1.93695	94.8721	3.34172
												90.0612	0.4685	89.7783	0.42448	85.1375	0.39061	95.1266	0.40465	89.5703	0.44011	95.1313	0.4736	91.6504	0.94114	90.8394	1.04232	95.1236	0.96387	91.7174	0.84088	95.131	0.89213	92.3063	0.86432	95.1238	2.07506	95.1367	1.81593	95.1238	1.85659	93.5806	1.97592	95.1239	2.04155	95.1311	1.94478	95.1238	3.35515
												90.3071	0.46917	90.0228	0.42506	85.3633	0.39084	95.3864	0.40542	89.8139	0.44063	95.391	0.4743	91.8912	0.94399	91.0875	1.04558	95.3846	0.96679	91.9616	0.84371	95.3823	0.89486	92.5536	0.86719	95.3846	2.08322	95.3951	1.82383	95.3846	1.86471	93.833	1.984	95.3849	2.05027	95.3823	1.95275	95.3846	3.36887
												90.5464	0.46998	90.264	0.42592	85.5955	0.39155	95.6393	0.40617	90.055	0.44137	95.6474	0.47527	92.1429	0.94685	91.3316	1.04921	95.6374	0.97001	92.2105	0.84618	95.6431	0.89776	92.8024	0.86969	95.6377	2.09174	95.6469	1.83196	95.6374	1.87308	94.0872	1.99235	95.6377	2.05905	95.6431	1.96078	95.638	3.38261
												90.7909	0.47071	90.505	0.42646	85.8238	0.39207	95.8982	0.40666	90.2955	0.44184	95.902	0.47576	92.3882	0.9497	91.5757	1.05245	95.8957	0.97303	92.4587	0.84889	95.8964	0.9005	93.0549	0.87264	95.8954	2.09994	95.9077	1.83988	95.8959	1.88147	94.3354	2.00083	95.8959	2.06768	95.8961	1.96895	95.8954	3.396
												91.0349	0.47188	90.7511	0.42727	86.0533	0.39268	96.1546	0.40776	90.5409	0.443	96.1618	0.47662	92.6342	0.95224	91.824	1.05586	96.1541	0.97614	92.7025	0.8514	96.1544	0.90306	93.2975	0.87549	96.1541	2.10791	96.1611	1.84803	96.1541	1.88953	94.5918	2.00913	96.1544	2.07612	96.1541	1.97677	96.1538	3.4088
												91.274	0.47221	90.9878	0.42776	86.2853	0.39373	96.4087	0.40805	90.7772	0.44339	96.4149	0.47707	92.885	0.95529	92.0634	1.05899	96.4059	0.97911	92.9529	0.85402	96.4129	0.90613	93.5518	0.87825	96.4057	2.11622	96.4182	1.85611	96.4057	1.89753	94.8412	2.01749	96.4059	2.08466	96.4128	1.98452	96.4054	3.42214
												91.5214	0.4729	91.2342	0.42832	86.51	0.39419	96.668	0.40872	91.0222	0.44422	96.6731	0.47757	93.1263	0.95827	92.3132	1.06248	96.6669	0.98212	93.1981	0.8568	96.6644	0.90896	93.7976	0.88104	96.6672	2.12442	96.6769	1.8639	96.6672	1.90575	95.0947	2.02578	96.6672	2.09296	96.6641	1.99247	96.6669	3.43532
												91.759	0.4739	91.4735	0.42918	86.7435	0.39508	96.921	0.4093	91.2618	0.44482	96.93	0.47847	93.378	0.96103	92.5556	1.06622	96.9195	0.98529	93.4461	0.8593	96.9256	0.91181	94.0466	0.88369	96.9192	2.13298	96.9284	1.87198	96.9192	1.91415	95.349	2.03418	96.9195	2.10148	96.9257	2.0003	96.919	3.4491
												92.0054	0.47423	91.7158	0.42968	86.9705	0.39574	97.1797	0.41002	91.5032	0.44543	97.1839	0.47904	93.6231	0.96415	92.8007	1.06945	97.178	0.98834	93.6955	0.86213	97.1782	0.91478	94.2984	0.88665	97.1782	2.14159	97.19	1.87992	97.178	1.92274	95.5969	2.04238	97.1782	2.11051	97.1774	2.00817	97.1782	3.46306
												92.2479	0.47517	91.9602	0.43052	87.2005	0.39642	97.4372	0.41102	91.7473	0.44633	97.4436	0.47999	93.8699	0.96688	93.0485	1.07295	97.4359	0.99176	93.9385	0.86472	97.4367	0.91759	94.5413	0.88945	97.4361	2.14989	97.4423	1.88828	97.4361	1.93125	95.8527	2.0507	97.4361	2.11929	97.4364	2.01635	97.4359	3.4766
												92.4886	0.47571	92.1981	0.43102	87.4322	0.39716	97.6903	0.41127	91.9849	0.44704	97.6962	0.48054	94.1196	0.97006	93.2885	1.07634	97.6882	0.99486	94.1894	0.8676	97.6949	0.92074	94.7955	0.89223	97.6882	2.15816	97.7007	1.89647	97.688	1.93954	96.1019	2.05915	97.6885	2.12829	97.6941	2.02453	97.6882	3.49032
												92.734	0.47659	92.4438	0.43152	87.6571	0.39769	97.9513	0.41212	92.2295	0.44761	97.9551	0.48133	94.362	0.97293	93.5375	1.07973	97.9477	0.99797	94.4336	0.87035	97.9467	0.92358	95.0413	0.89521	97.9477	2.16633	97.9587	1.9047	97.9477	1.94788	96.3557	2.06766	97.9477	2.13692	97.9467	2.03287	97.9477	3.50349
												92.974	0.47726	92.6841	0.43233	87.8918	0.39844	98.202	0.41292	92.469	0.44834	98.212	0.48211	94.6121	0.97595	93.7797	1.08333	98.202	1.00115	94.6821	0.87271	98.2064	0.92651	95.2908	0.89773	98.2018	2.17475	98.2113	1.91283	98.2018	1.95625	96.6094	2.07611	98.2023	2.14588	98.2061	2.0411	98.2018	3.51659
												93.2187	0.47779	92.9255	0.4329	88.1174	0.39926	98.462	0.41353	92.7104	0.4488	98.4656	0.48267	94.8592	0.97907	94.0246	1.08667	98.4595	1.00425	94.9313	0.87579	98.4605	0.92946	95.5422	0.90068	98.4595	2.18332	98.4705	1.92094	98.4595	1.96474	96.8576	2.08441	98.4598	2.1549	98.4603	2.04899	98.4597	3.53023
												93.463	0.479	93.1702	0.43379	88.3489	0.39974	98.7187	0.41435	92.9543	0.44973	98.7262	0.48343	95.1042	0.98182	94.2719	1.09026	98.7184	1.00783	95.1743	0.87846	98.7185	0.9323	95.7859	0.90335	98.7187	2.19166	98.7249	1.92921	98.7182	1.97314	97.1137	2.09267	98.7187	2.16384	98.718	2.05701	98.7184	3.54346
												93.7021	0.47942	93.4076	0.43425	88.5796	0.40051	98.9733	0.41463	93.1916	0.45041	98.9774	0.48425	95.3557	0.98495	94.5126	1.09376	98.97	1.01086	95.4259	0.88117	98.9775	0.93562	96.0387	0.90647	98.9703	2.20007	98.9826	1.9374	98.97	1.98157	97.3638	2.10129	98.9702	2.17277	98.9769	2.06523	98.97	3.55737
												93.9482	0.48023	93.6533	0.43502	88.8049	0.40102	99.232	0.41562	93.4357	0.45096	99.2374	0.48491	95.5966	0.98785	94.7609	1.09737	99.231	1.01405	95.6692	0.88403	99.2287	0.93857	96.286	0.90939	99.231	2.20841	99.2415	1.94578	99.2313	1.99003	97.6166	2.10994	99.2313	2.18154	99.2284	2.07339	99.2307	3.57058
												94.1876	0.481	93.8943	0.43578	89.0371	0.40171	99.4856	0.41629	93.6772	0.4518	99.4943	0.48579	95.848	0.99104	95.0048	1.10122	99.4836	1.01716	95.9186	0.88648	99.49	0.94159	96.5343	0.91202	99.4834	2.21681	99.493	1.95406	99.4836	1.99828	97.8719	2.11855	99.4839	2.19029	99.4895	2.08121	99.4834	3.58361
												94.4326	0.48152	94.1354	0.4363	89.2654	0.40253	99.7436	0.41683	93.9173	0.45222	99.7485	0.4863	96.0935	0.99421	95.2486	1.10458	99.7415	1.02012	96.1671	0.8895	99.7423	0.94459	96.7868	0.91512	99.7423	2.22525	99.7544	1.96203	99.7418	2.00664	98.1188	2.12724	99.7421	2.1991	99.7418	2.08937	99.7418	3.597
												94.6763	0.48232	94.3804	0.43692	89.495	0.403	100.001	0.41764	94.162	0.45318	100.007	0.48727	96.3401	0.9973	95.4969	1.10831	100.001	1.0236	96.4108	0.89218	100	0.94732	97.0297	0.91804	100	2.23361	100.006	1.97016	100	2.01513	98.3753	2.13579	100	2.20806	100	2.09751	100	3.61002
												94.9161	0.48274	94.6179	0.43757	89.728	0.4039	100.255	0.41793	94.3986	0.45397	100.261	0.48792	96.5904	1.00051	95.7362	1.11174	100.251	1.02689	96.6615	0.89533	100.259	0.95053	97.2835	0.92107	100.251	2.24226	100.265	1.97824	100.252	2.02376	98.6251	2.14464	100.252	2.21716	100.258	2.10582	100.252	3.62399
												95.1625	0.48365	94.8637	0.43822	89.9523	0.40457	100.515	0.41898	94.6439	0.45445	100.519	0.48843	96.8324	1.00372	95.9862	1.11538	100.513	1.03022	96.906	0.89842	100.51	0.95367	97.5295	0.92415	100.513	2.25069	100.523	1.98654	100.513	2.0323	98.8783	2.15359	100.513	2.22635	100.51	2.11435	100.513	3.63768
												95.4012	0.48458	95.1041	0.43904	90.1856	0.40516	100.767	0.41952	94.8836	0.45548	100.776	0.48943	97.0829	1.00678	96.2286	1.11927	100.765	1.03368	97.1544	0.90102	100.772	0.95644	97.779	0.92712	100.765	2.25944	100.775	1.99505	100.766	2.04103	99.1326	2.16247	100.766	2.23569	100.771	2.12282	100.765	3.65139
												95.6461	0.48494	95.3463	0.43966	90.4123	0.40591	101.026	0.42039	95.1253	0.45561	101.03	0.4898	97.3282	1.01025	96.4739	1.12275	101.024	1.03667	97.4036	0.9043	101.024	0.95971	98.0306	0.93032	101.024	2.26819	101.036	2.0033	101.024	2.04951	99.3797	2.17149	101.025	2.24453	101.024	2.13124	101.024	3.66519
												95.8901	0.48599	95.591	0.4404	90.6425	0.40643	101.283	0.42126	95.3692	0.45671	101.29	0.49073	97.5752	1.01322	96.7213	1.1264	101.282	1.04002	97.6463	0.90714	101.283	0.96264	98.2736	0.93337	101.282	2.27693	101.289	2.01185	101.282	2.05821	99.6368	2.1801	101.282	2.25359	101.282	2.13961	101.282	3.67866
												96.1304	0.48644	95.8272	0.44102	90.8745	0.40749	101.536	0.42188	95.6053	0.45709	101.543	0.49131	97.8252	1.0166	96.9615	1.12993	101.534	1.04326	97.8977	0.91003	101.541	0.96587	98.5274	0.93639	101.534	2.28586	101.547	2.02037	101.534	2.06689	99.8855	2.18848	101.535	2.26275	101.54	2.14836	101.534	3.69269
												96.3756	0.48736	96.0738	0.44149	91.099	0.40766	101.798	0.42238	95.8511	0.45782	101.801	0.49175	98.067	1.01966	97.2103	1.13357	101.794	1.04649	98.1415	0.91303	101.793	0.96882	98.7727	0.93958	101.794	2.29458	101.805	2.02891	101.794	2.07542	100.139	2.19728	101.794	2.27186	101.793	2.15677	101.794	3.70643
												96.6157	0.48796	96.3138	0.44246	91.3337	0.40831	102.048	0.4232	96.0906	0.45872	102.058	0.49257	98.3175	1.02297	97.4531	1.13728	102.048	1.04985	98.3902	0.91581	102.053	0.9719	99.023	0.94234	102.048	2.30345	102.057	2.03749	102.048	2.0845	100.393	2.20615	102.049	2.28131	102.053	2.1651	102.048	3.72036
												96.8599	0.48865	96.5561	0.44291	91.5597	0.40916	102.308	0.42348	96.3318	0.45895	102.312	0.49319	98.564	1.02637	97.6973	1.14078	102.305	1.053	98.6399	0.91891	102.307	0.9749	99.2738	0.94565	102.306	2.31229	102.317	2.0462	102.305	2.0933	100.641	2.21533	102.306	2.29039	102.307	2.17351	102.306	3.73438
												97.1037	0.4896	96.8005	0.44367	91.7904	0.4096	102.564	0.42429	96.5759	0.45997	102.573	0.4938	98.8099	1.02942	97.9458	1.14442	102.565	1.05646	98.8829	0.92177	102.565	0.97813	99.5178	0.94875	102.565	2.32102	102.571	2.05486	102.565	2.10192	100.897	2.22456	102.565	2.29954	102.564	2.18219	102.564	3.74714
												97.3437	0.4898	97.0384	0.44424	92.0219	0.41075	102.819	0.42468	96.8135	0.46044	102.824	0.49463	99.0606	1.03272	98.1858	1.14794	102.816	1.05979	99.1338	0.92466	102.824	0.98145	99.7706	0.95191	102.816	2.32967	102.829	2.06346	102.816	2.11069	101.147	2.23388	102.816	2.30885	102.823	2.19056	102.816	3.76027
												97.5891	0.49075	97.283	0.445	92.247	0.41097	103.078	0.42542	97.0576	0.46124	103.084	0.49501	99.3027	1.03584	98.4336	1.15156	103.077	1.06298	99.378	0.92775	103.075	0.98416	100.018	0.95504	103.077	2.33836	103.087	2.07195	103.077	2.11941	101.4	2.24285	103.077	2.31812	103.075	2.19909	103.077	3.77379
												97.8292	0.49131	97.5246	0.44589	92.4797	0.41189	103.331	0.42607	97.2985	0.46208	103.339	0.49609	99.5532	1.03889	98.6773	1.15523	103.33	1.06627	99.6262	0.93053	103.336	0.98757	100.266	0.95798	103.33	2.34741	103.339	2.0804	103.33	2.1285	101.655	2.25209	103.33	2.32778	103.335	2.20773	103.33	3.78818
												98.0737	0.49204	97.7654	0.44628	92.7078	0.41252	103.59	0.42663	97.5385	0.46246	103.595	0.49645	99.7992	1.04214	98.9214	1.15865	103.588	1.06979	99.8752	0.93387	103.589	0.99102	100.518	0.96118	103.588	2.35652	103.6	2.08906	103.588	2.13764	101.902	2.26119	103.588	2.33748	103.588	2.21644	103.588	3.80274
												98.3174	0.49298	98.0105	0.44714	92.9371	0.41306	103.847	0.42768	97.7834	0.4635	103.854	0.49741	100.045	1.04513	99.1702	1.16279	103.846	1.07345	100.119	0.93666	103.847	0.99421	100.762	0.96422	103.846	2.36558	103.853	2.0979	103.846	2.14679	102.159	2.2703	103.846	2.34715	103.847	2.22533	103.847	3.81646
												98.5568	0.49349	98.2477	0.44758	93.17	0.41415	104.101	0.42804	98.0202	0.46377	104.107	0.49801	100.295	1.04856	99.4094	1.1664	104.098	1.07692	100.369	0.9395	104.105	0.99757	101.015	0.96714	104.098	2.37488	104.111	2.10692	104.098	2.15608	102.408	2.27984	104.098	2.35694	104.105	2.23438	104.098	3.83069
												98.8044	0.4944	98.494	0.44823	93.3942	0.4146	104.36	0.42876	98.2657	0.46456	104.365	0.49851	100.538	1.05188	99.6591	1.17003	104.359	1.08044	100.614	0.94271	104.357	1.00062	101.261	0.97044	104.359	2.38384	104.37	2.11591	104.359	2.16514	102.661	2.28935	104.359	2.36624	104.356	2.24365	104.359	3.84428
												99.0426	0.49522	98.7341	0.44894	93.6279	0.41541	104.613	0.42939	98.5057	0.46522	104.622	0.49977	100.788	1.05511	99.9015	1.1739	104.611	1.08401	100.862	0.94549	104.618	1.0039	101.51	0.9734	104.611	2.39281	104.621	2.12499	104.611	2.17427	102.916	2.29831	104.612	2.37604	104.617	2.25248	104.611	3.85783
												99.2882	0.49588	98.9758	0.44929	93.8544	0.4158	104.872	0.43025	98.7464	0.46589	104.876	0.50012	101.034	1.05865	100.146	1.17743	104.87	1.08721	101.112	0.94895	104.87	1.00725	101.762	0.97688	104.87	2.40206	104.882	2.13362	104.87	2.18357	103.164	2.30729	104.871	2.38578	104.87	2.26135	104.87	3.87217
												99.531	0.49667	99.2207	0.45022	94.0853	0.41645	105.129	0.43122	98.9908	0.46667	105.135	0.50121	101.28	1.06173	100.394	1.18132	105.128	1.09097	101.355	0.95171	105.129	1.01032	102.005	0.97977	105.128	2.41152	105.134	2.14249	105.128	2.19307	103.42	2.31629	105.129	2.39574	105.129	2.2701	105.128	3.88636
												99.7711	0.49725	99.4574	0.45079	94.3166	0.41736	105.383	0.43092	99.2274	0.46724	105.389	0.5018	101.531	1.06513	100.634	1.18508	105.381	1.09427	101.606	0.95463	105.387	1.01403	102.259	0.98279	105.381	2.42111	105.393	2.15174	105.381	2.20247	103.67	2.32545	105.381	2.40563	105.387	2.27924	105.381	3.90089
												100.016	0.49804	99.7035	0.45149	94.5413	0.41793	105.643	0.43229	99.4727	0.468	105.647	0.5027	101.773	1.06832	100.883	1.18875	105.641	1.09775	101.85	0.95782	105.639	1.0172	102.505	0.98636	105.64	2.4301	105.651	2.16097	105.64	2.21155	103.923	2.33444	105.641	2.41532	105.639	2.28844	105.64	3.91446
												100.256	0.49891	99.9438	0.45232	94.7755	0.41853	105.895	0.43283	99.7127	0.46862	105.905	0.50341	102.022	1.07162	101.126	1.19264	105.894	1.10121	102.098	0.9608	105.899	1.02057	102.755	0.9895	105.894	2.43917	105.903	2.16996	105.894	2.22063	104.177	2.34376	105.895	2.42532	105.899	2.29737	105.894	3.92805
												100.502	0.49932	100.186	0.45263	95.0016	0.41947	106.154	0.43335	99.9539	0.46933	106.158	0.50364	102.27	1.07481	101.371	1.196	106.152	1.10462	102.347	0.9639	106.153	1.02412	103.006	0.99297	106.152	2.44823	106.163	2.17859	106.152	2.22997	104.425	2.35308	106.152	2.43513	106.153	2.30627	106.152	3.94191
												100.745	0.50055	100.43	0.45347	95.2325	0.41975	106.411	0.43413	100.198	0.47016	106.419	0.50457	102.514	1.07792	101.618	1.19987	106.41	1.10822	102.591	0.96694	106.41	1.02727	103.25	0.99601	106.41	2.45712	106.417	2.18759	106.411	2.23911	104.681	2.36223	106.411	2.44512	106.41	2.31523	106.41	3.95528
												100.985	0.50087	100.668	0.45384	95.464	0.42066	106.666	0.43463	100.435	0.47072	106.67	0.50519	102.766	1.08145	101.858	1.20332	106.662	1.11162	102.842	0.97016	106.669	1.03074	103.503	0.99928	106.662	2.4663	106.675	2.19666	106.662	2.24818	104.93	2.37152	106.663	2.45501	106.669	2.32398	106.662	3.96939
												101.231	0.50173	100.913	0.45486	95.6891	0.42101	106.924	0.43547	100.679	0.47134	106.93	0.5058	103.008	1.08472	102.107	1.20712	106.923	1.11507	103.085	0.97323	106.921	1.03401	103.75	1.00267	106.922	2.47546	106.934	2.20561	106.923	2.25729	105.183	2.38076	106.923	2.46463	106.921	2.33284	106.923	3.98288
												101.471	0.50239	101.155	0.45555	95.922	0.42199	107.177	0.43602	100.92	0.47213	107.187	0.5068	103.259	1.08778	102.35	1.21104	107.176	1.11859	103.335	0.97607	107.182	1.03753	103.998	1.0058	107.176	2.48459	107.185	2.21467	107.176	2.26671	105.439	2.39	107.176	2.47462	107.181	2.34159	107.176	3.99641
												101.715	0.5032	101.396	0.45611	96.1496	0.42252	107.436	0.43661	101.16	0.47267	107.441	0.50721	103.504	1.09121	102.595	1.21474	107.435	1.12193	103.583	0.97937	107.435	1.041	104.251	1.00905	107.434	2.49381	107.446	2.22338	107.434	2.27621	105.686	2.39947	107.434	2.48453	107.435	2.35054	107.434	4.01005
												101.959	0.50406	101.64	0.45696	96.3796	0.42317	107.693	0.43753	101.405	0.47332	107.7	0.50803	103.751	1.0943	102.843	1.21859	107.692	1.12571	103.827	0.98241	107.693	1.04443	104.494	1.0122	107.692	2.50282	107.699	2.23246	107.692	2.28555	105.942	2.40904	107.692	2.49439	107.693	2.35962	107.692	4.02347
												102.199	0.5045	101.878	0.45752	96.612	0.42378	107.947	0.43771	101.642	0.47417	107.953	0.5088	104.001	1.0978	103.082	1.22233	107.944	1.12895	104.077	0.98566	107.951	1.04803	104.747	1.01542	107.944	2.51205	107.957	2.24174	107.944	2.29517	106.192	2.41836	107.944	2.50429	107.95	2.36845	107.944	4.03746
												102.446	0.5052	102.124	0.45816	96.8367	0.42447	108.206	0.43859	101.887	0.47478	108.211	0.50928	104.243	1.1012	103.332	1.22623	108.205	1.13249	104.322	0.98879	108.203	1.05132	104.993	1.01878	108.205	2.52119	108.215	2.25079	108.205	2.30436	106.445	2.42744	108.206	2.5141	108.203	2.37741	108.205	4.05111
												102.683	0.50598	102.364	0.45894	97.0703	0.4251	108.46	0.43927	102.127	0.47561	108.468	0.51	104.494	1.10463	103.575	1.23001	108.457	1.13626	104.571	0.99183	108.464	1.05474	105.243	1.02209	108.457	2.53037	108.467	2.25999	108.457	2.31377	106.699	2.43679	108.458	2.52419	108.464	2.38654	108.457	4.06505
												102.929	0.50642	102.606	0.45948	97.2965	0.42588	108.717	0.43983	102.368	0.47612	108.723	0.51044	104.739	1.1083	103.82	1.23368	108.716	1.13966	104.82	0.99517	108.716	1.0584	105.494	1.02554	108.716	2.53954	108.728	2.26883	108.716	2.32333	106.947	2.44617	108.717	2.5343	108.716	2.39562	108.717	4.07962
												103.173	0.50746	102.851	0.46023	97.5268	0.42661	108.975	0.44071	102.613	0.47685	108.982	0.51139	104.985	1.11145	104.067	1.23777	108.974	1.14363	105.063	0.99828	108.975	1.06177	105.738	1.0289	108.974	2.54855	108.981	2.27801	108.974	2.33263	107.204	2.45541	108.975	2.54441	108.975	2.4046	108.975	4.09267
												103.413	0.50797	103.088	0.46086	97.7588	0.42733	109.229	0.44125	102.849	0.47742	109.235	0.51199	105.236	1.11492	104.307	1.24164	109.227	1.14712	105.314	1.00157	109.233	1.06546	105.991	1.03215	109.227	2.55771	109.24	2.28732	109.227	2.34188	107.452	2.46458	109.227	2.55427	109.233	2.41359	109.227	4.10656
												103.658	0.50885	103.334	0.46154	97.9832	0.42805	109.489	0.44186	103.094	0.47787	109.493	0.51277	105.478	1.11816	104.556	1.2453	109.486	1.15076	105.558	1.00494	109.486	1.06873	106.237	1.03575	109.487	2.56663	109.498	2.29626	109.486	2.35084	107.707	2.47356	109.487	2.56414	109.486	2.42235	109.487	4.11981
												103.898	0.50945	103.574	0.46235	98.2174	0.42839	109.741	0.44252	103.334	0.479	109.751	0.51357	105.728	1.1216	104.799	1.24935	109.741	1.15437	105.807	1.00801	109.745	1.07239	106.486	1.03893	109.741	2.57569	109.75	2.30526	109.741	2.36007	107.96	2.48261	109.741	2.57405	109.745	2.43102	109.741	4.1334
												104.142	0.51004	103.816	0.46288	98.4439	0.42922	110.001	0.44295	103.575	0.47931	110.004	0.51397	105.975	1.1251	105.044	1.25299	109.998	1.15782	106.056	1.01132	110	1.07597	106.738	1.04243	109.997	2.58509	110.01	2.31416	109.998	2.36948	108.209	2.49183	109.998	2.58414	109.999	2.43995	109.998	4.14745
												104.386	0.5109	104.06	0.4638	98.675	0.42972	110.257	0.44404	103.819	0.48033	110.265	0.5149	106.22	1.12845	105.291	1.25713	110.257	1.16174	106.299	1.01448	110.257	1.07924	106.981	1.04582	110.257	2.59411	110.264	2.32308	110.257	2.37877	108.464	2.50081	110.257	2.59407	110.256	2.44887	110.257	4.16082
												104.626	0.5112	104.298	0.46424	98.9059	0.43054	110.511	0.44447	104.056	0.48069	110.516	0.51549	106.471	1.13201	105.531	1.26102	110.509	1.16514	106.55	1.01772	110.515	1.08286	107.234	1.04942	110.509	2.60301	110.521	2.33228	110.509	2.38791	108.715	2.51044	110.509	2.604	110.515	2.45772	110.508	4.17396
												104.872	0.51221	104.544	0.46479	99.1315	0.43098	110.77	0.44511	104.301	0.48138	110.776	0.51606	106.712	1.13543	105.78	1.26515	110.769	1.16854	106.793	1.02119	110.767	1.08619	107.482	1.05292	110.769	2.61161	110.78	2.34148	110.769	2.39684	108.967	2.52008	110.77	2.61384	110.767	2.46652	110.769	4.18677
												105.112	0.5131	104.784	0.46577	99.3639	0.43169	111.023	0.44577	104.541	0.48236	111.033	0.51671	106.964	1.1389	106.023	1.26908	111.022	1.17217	107.043	1.02413	111.028	1.08983	107.73	1.0562	111.022	2.62054	111.032	2.35038	111.022	2.40621	109.223	2.52959	111.022	2.62371	111.027	2.47532	111.022	4.2001
												105.356	0.51352	105.025	0.46605	99.592	0.43251	111.282	0.44627	104.782	0.48271	111.286	0.51728	107.21	1.14245	106.267	1.27299	111.281	1.17557	107.291	1.02785	111.281	1.09358	107.982	1.05974	111.28	2.62951	111.292	2.3592	111.281	2.41532	109.469	2.53892	111.281	2.63379	111.281	2.48416	111.28	4.21366
												105.601	0.51436	105.27	0.467	99.8215	0.43287	111.539	0.44711	105.027	0.48367	111.546	0.51812	107.456	1.14579	106.516	1.27711	111.539	1.17938	107.535	1.03123	111.539	1.09707	108.225	1.06289	111.539	2.63856	111.545	2.36825	111.539	2.42437	109.726	2.54818	111.539	2.64388	111.539	2.49286	111.539	4.22674
												105.84	0.51477	105.508	0.46754	100.054	0.43377	111.794	0.44758	105.263	0.48417	111.798	0.51893	107.706	1.14948	106.755	1.28111	111.79	1.18291	107.786	1.03471	111.797	1.10087	108.479	1.06621	111.79	2.64803	111.804	2.37717	111.79	2.43418	109.975	2.5575	111.79	2.65432	111.797	2.50177	111.79	4.24078
												106.086	0.51565	105.754	0.46819	100.278	0.43434	112.053	0.44853	105.509	0.48474	112.058	0.51938	107.948	1.15294	107.005	1.28518	112.052	1.18636	108.03	1.0381	112.049	1.10433	108.725	1.06985	112.052	2.65707	112.062	2.38617	112.052	2.44369	110.229	2.56681	112.052	2.66409	112.049	2.51081	112.052	4.25387
												106.325	0.51646	105.994	0.46883	100.512	0.43509	112.306	0.44906	105.749	0.48545	112.314	0.52005	108.199	1.15631	107.247	1.28943	112.304	1.19012	108.279	1.04132	112.31	1.10797	108.974	1.07322	112.304	2.66621	112.313	2.39568	112.303	2.45299	110.484	2.57604	112.304	2.67398	112.31	2.51938	112.304	4.26697
												106.571	0.51698	106.236	0.4692	100.739	0.43584	112.564	0.44953	105.99	0.48609	112.569	0.52048	108.444	1.16014	107.493	1.29345	112.562	1.19362	108.527	1.04503	112.562	1.11184	109.226	1.07694	112.562	2.67516	112.575	2.40473	112.562	2.4623	110.73	2.58545	112.562	2.68392	112.562	2.52832	112.563	4.28098
												106.814	0.51794	106.481	0.46986	100.97	0.43669	112.822	0.45052	106.234	0.48693	112.828	0.52123	108.691	1.16371	107.74	1.29769	112.82	1.19741	108.771	1.0484	112.821	1.11519	109.469	1.08062	112.82	2.68412	112.826	2.41369	112.821	2.47169	110.987	2.59478	112.821	2.69386	112.821	2.53731	112.82	4.29431
												107.054	0.5185	106.718	0.47064	101.201	0.43742	113.075	0.45105	106.471	0.48751	113.081	0.52193	108.942	1.16768	107.98	1.30161	113.073	1.20101	109.022	1.05176	113.079	1.11891	109.723	1.08424	113.073	2.69335	113.085	2.42265	113.073	2.48114	111.236	2.60425	113.073	2.70413	113.079	2.54633	113.073	4.30863
												107.299	0.51945	106.964	0.47122	101.425	0.43788	113.335	0.45194	106.716	0.48796	113.339	0.52264	109.183	1.17105	108.229	1.30547	113.333	1.20473	109.266	1.05543	113.332	1.1224	109.968	1.08802	113.333	2.7023	113.343	2.43163	113.332	2.49045	111.49	2.61368	113.333	2.7146	113.331	2.55553	113.333	4.32212
												107.539	0.51998	107.204	0.47222	101.66	0.43848	113.587	0.45255	106.956	0.48893	113.597	0.52336	109.434	1.17446	108.471	1.30966	113.587	1.20855	109.515	1.05858	113.591	1.1261	110.219	1.0914	113.587	2.71142	113.596	2.44089	113.587	2.50011	111.744	2.62325	113.587	2.72497	113.591	2.56461	113.587	4.33549
												107.784	0.5205	107.446	0.47252	101.885	0.43914	113.847	0.45307	107.197	0.4892	113.85	0.52397	109.68	1.17841	108.716	1.31364	113.844	1.21209	109.764	1.06211	113.846	1.12999	110.47	1.09539	113.844	2.72068	113.855	2.45019	113.844	2.5095	111.992	2.63308	113.844	2.73507	113.845	2.57383	113.844	4.34926
												108.028	0.5217	107.69	0.47334	102.117	0.43989	114.104	0.45385	107.441	0.49017	114.11	0.52474	109.925	1.18208	108.964	1.31786	114.103	1.21593	110.007	1.06542	114.103	1.13345	110.714	1.09912	114.104	2.72973	114.111	2.4595	114.104	2.51898	112.248	2.64288	114.104	2.74504	114.102	2.58284	114.103	4.36251
												108.268	0.52185	107.928	0.47373	102.348	0.4405	114.358	0.45453	107.678	0.49085	114.363	0.52546	110.177	1.18568	109.205	1.32156	114.354	1.21948	110.258	1.06863	114.362	1.13736	110.966	1.10278	114.355	2.73925	114.367	2.46888	114.355	2.52867	112.498	2.65253	114.355	2.75554	114.362	2.59191	114.354	4.3761
												108.514	0.52256	108.173	0.47451	102.573	0.44116	114.617	0.45547	107.922	0.49173	114.622	0.5261	110.417	1.18913	109.452	1.32568	114.616	1.22328	110.502	1.07223	114.613	1.14096	111.213	1.10653	114.616	2.7484	114.626	2.47811	114.616	2.53827	112.751	2.66205	114.616	2.76588	114.613	2.60097	114.616	4.38973
												108.753	0.52297	108.414	0.47518	102.806	0.44164	114.87	0.45623	108.163	0.49255	114.879	0.52717	110.67	1.19252	109.696	1.32976	114.868	1.22706	110.751	1.07564	114.875	1.14481	111.461	1.10997	114.868	2.75785	114.877	2.48745	114.868	2.54801	113.005	2.67163	114.868	2.7765	114.874	2.60974	114.868	4.4036
												108.998	0.52367	108.655	0.47551	103.034	0.44255	115.128	0.45626	108.403	0.49292	115.133	0.52748	110.915	1.19643	109.94	1.33359	115.127	1.23073	110.999	1.07936	115.127	1.14877	111.715	1.11366	115.127	2.76724	115.139	2.49666	115.127	2.55779	113.253	2.68139	115.127	2.78708	115.127	2.61909	115.127	4.4177
												109.242	0.52489	108.901	0.47651	103.264	0.44251	115.385	0.45743	108.649	0.49371	115.392	0.52824	111.161	1.19984	110.189	1.33788	115.385	1.23464	111.243	1.08288	115.385	1.15227	111.957	1.11738	115.385	2.77634	115.391	2.50621	115.385	2.56762	113.51	2.69136	115.385	2.79743	115.385	2.62857	115.385	4.43103
												109.481	0.52553	109.138	0.47708	103.496	0.44354	115.64	0.45767	108.885	0.49432	115.645	0.52895	111.412	1.20352	110.429	1.34194	115.636	1.2384	111.493	1.08654	115.643	1.15633	112.211	1.12115	115.636	2.78585	115.65	2.51589	115.636	2.5776	113.759	2.70134	115.636	2.80776	115.643	2.63775	115.636	4.44509
												109.728	0.52614	109.384	0.47769	103.721	0.44442	115.898	0.45835	109.131	0.49489	115.904	0.52958	111.653	1.20717	110.678	1.34611	115.897	1.24219	111.739	1.08995	115.895	1.16006	112.457	1.1249	115.897	2.79518	115.908	2.52513	115.897	2.58727	114.013	2.71115	115.897	2.81803	115.895	2.64704	115.897	4.45855
												109.967	0.52697	109.624	0.47854	103.954	0.44483	116.152	0.45888	109.37	0.49565	116.16	0.53049	111.905	1.21095	110.92	1.35036	116.15	1.24616	111.986	1.09331	116.156	1.16391	112.706	1.12828	116.15	2.80461	116.16	2.5347	116.15	2.59694	114.267	2.72077	116.15	2.82883	116.156	2.6562	116.15	4.47228
												110.212	0.52728	109.866	0.47904	104.181	0.44577	116.409	0.4594	109.612	0.49621	116.415	0.53107	112.15	1.21488	111.165	1.3543	116.409	1.24995	112.236	1.09718	116.408	1.16805	112.958	1.13205	116.409	2.81425	116.42	2.54417	116.409	2.60704	114.514	2.73055	116.409	2.83938	116.408	2.6655	116.409	4.48698
												110.455	0.52825	110.111	0.47985	104.411	0.44604	116.668	0.46072	109.856	0.49698	116.673	0.53169	112.397	1.2185	111.413	1.35853	116.667	1.25407	112.479	1.10069	116.667	1.17181	113.201	1.13586	116.667	2.82372	116.673	2.55366	116.667	2.61737	114.771	2.73999	116.667	2.85003	116.667	2.67491	116.667	4.50104
												110.696	0.5284	110.348	0.48015	104.643	0.44703	116.921	0.461	110.093	0.49754	116.927	0.53253	112.647	1.22249	111.653	1.36253	116.919	1.2574	112.73	1.10425	116.926	1.1759	113.455	1.13945	116.919	2.83316	116.932	2.56337	116.919	2.6275	115.02	2.74949	116.919	2.8609	116.925	2.68459	116.919	4.51541
												110.941	0.52944	110.594	0.48075	104.867	0.44754	117.182	0.46182	110.338	0.49806	117.185	0.53324	112.889	1.22615	111.902	1.3668	117.179	1.26137	112.974	1.1078	117.178	1.17976	113.7	1.14362	117.179	2.84206	117.19	2.57317	117.179	2.63709	115.274	2.75936	117.179	2.87135	117.177	2.69409	117.178	4.52877
												111.181	0.53	110.834	0.48151	105.101	0.44816	117.433	0.4626	110.578	0.49902	117.443	0.53407	113.139	1.22984	112.144	1.37114	117.432	1.26529	113.223	1.11131	117.437	1.18389	113.951	1.14718	117.433	2.85108	117.442	2.58294	117.432	2.64677	115.528	2.76924	117.433	2.88186	117.437	2.70322	117.433	4.54211
												111.425	0.53043	111.076	0.48201	105.328	0.4492	117.693	0.46294	110.818	0.49945	117.697	0.53442	113.385	1.23372	112.389	1.37502	117.69	1.26907	113.472	1.11515	117.691	1.18806	114.202	1.15122	117.69	2.86029	117.702	2.59218	117.69	2.65656	115.776	2.77899	117.691	2.89215	117.691	2.71255	117.69	4.55589
												111.669	0.53129	111.32	0.48284	105.559	0.44958	117.949	0.46368	111.062	0.50038	117.957	0.53516	113.631	1.23736	112.637	1.37933	117.949	1.27307	113.715	1.11879	117.949	1.19166	114.445	1.15485	117.95	2.86921	117.956	2.6016	117.95	2.66615	116.031	2.78858	117.949	2.90246	117.948	2.72161	117.949	4.56895
												111.909	0.53187	111.558	0.48342	105.79	0.45066	118.204	0.46415	111.3	0.50086	118.209	0.53581	113.883	1.24113	112.877	1.38331	118.201	1.27685	113.966	1.1223	118.208	1.19569	114.698	1.15875	118.201	2.87849	118.213	2.61121	118.201	2.67605	116.282	2.79819	118.201	2.91292	118.207	2.73055	118.201	4.58277
												112.155	0.53275	111.803	0.48401	106.016	0.45087	118.463	0.46531	111.544	0.50142	118.468	0.53636	114.123	1.24493	113.125	1.38757	118.462	1.28075	114.21	1.12624	118.46	1.19953	114.945	1.16279	118.462	2.88763	118.472	2.62069	118.462	2.68582	116.534	2.80798	118.462	2.92323	118.459	2.73988	118.462	4.59594
												112.395	0.53337	112.044	0.48476	106.248	0.45165	118.716	0.46588	111.785	0.50205	118.725	0.53737	114.375	1.24843	113.37	1.392	118.714	1.2846	114.459	1.12967	118.721	1.20362	115.194	1.16651	118.714	2.89688	118.724	2.63041	118.715	2.69575	116.789	2.81753	118.715	2.93336	118.72	2.74884	118.714	4.60927
												112.639	0.53384	112.285	0.48525	106.476	0.45234	118.975	0.46645	112.025	0.50247	118.979	0.5378	114.62	1.25232	113.613	1.39611	118.972	1.28837	114.708	1.13367	118.973	1.20777	115.447	1.17053	118.972	2.90603	118.985	2.63987	118.972	2.70584	117.037	2.82729	118.972	2.94393	118.973	2.75783	118.972	4.62297
												112.883	0.53487	112.531	0.48625	106.706	0.45285	119.232	0.46717	112.27	0.50375	119.238	0.5387	114.866	1.25591	113.862	1.40067	119.231	1.2923	114.951	1.13717	119.231	1.21153	115.689	1.1743	119.231	2.91495	119.237	2.64957	119.231	2.71559	117.293	2.83708	119.232	2.95448	119.231	2.76689	119.231	4.63623
												113.123	0.53531	112.768	0.48668	106.938	0.45387	119.486	0.46758	112.506	0.50408	119.491	0.53917	115.117	1.25989	114.102	1.40507	119.482	1.29631	115.202	1.14106	119.49	1.21581	115.943	1.17829	119.482	2.92422	119.496	2.65903	119.482	2.72557	117.542	2.8469	119.483	2.96537	119.49	2.77602	119.483	4.65025
												113.369	0.53608	113.014	0.48741	107.163	0.45417	119.745	0.46839	112.752	0.50495	119.75	0.53959	115.359	1.26391	114.351	1.40929	119.744	1.30024	115.447	1.14504	119.741	1.21967	116.189	1.18243	119.744	2.93347	119.754	2.66823	119.744	2.73545	117.796	2.8565	119.744	2.97591	119.741	2.78565	119.744	4.664
												113.608	0.53691	113.254	0.48809	107.396	0.45492	119.998	0.46917	112.992	0.50559	120.007	0.54052	115.61	1.2678	114.593	1.41396	119.995	1.30426	115.695	1.14873	120.003	1.2236	116.438	1.18611	119.996	2.943	120.006	2.67776	119.996	2.74557	118.05	2.86613	119.996	2.98679	120.003	2.79526	119.996	4.67791
												113.853	0.53719	113.496	0.48849	107.623	0.4554	120.256	0.4697	113.233	0.50604	120.261	0.54089	115.855	1.27178	114.839	1.41797	120.255	1.30813	115.943	1.15283	120.254	1.22799	116.69	1.19029	120.255	2.95255	120.267	2.68724	120.255	2.75567	118.298	2.87607	120.255	2.9975	120.254	2.80477	120.255	4.69183
												114.097	0.53828	113.741	0.48943	107.853	0.45618	120.514	0.47042	113.477	0.5068	120.52	0.54188	116.102	1.27554	115.086	1.42253	120.513	1.31228	116.187	1.15649	120.514	1.23214	116.933	1.19421	120.512	2.96166	120.519	2.69685	120.513	2.76557	118.554	2.88571	120.513	3.00802	120.514	2.81417	120.513	4.70476
												114.337	0.53863	113.978	0.48999	108.085	0.45668	120.767	0.47087	113.714	0.50751	120.773	0.54255	116.352	1.27977	115.326	1.42694	120.765	1.3162	116.438	1.16049	120.771	1.23661	117.187	1.19817	120.765	2.97074	120.778	2.70656	120.765	2.77535	118.804	2.89534	120.765	3.01866	120.771	2.82348	120.765	4.71834
												114.583	0.53951	114.224	0.49044	108.31	0.45728	121.028	0.47141	113.959	0.5079	121.031	0.54323	116.594	1.2836	115.575	1.43124	121.025	1.32004	116.683	1.16438	121.024	1.24061	117.432	1.20246	121.025	2.97976	121.036	2.71586	121.025	2.7851	119.057	2.9048	121.025	3.02912	121.023	2.83279	121.024	4.73126
												114.822	0.54028	114.464	0.49139	108.544	0.45783	121.279	0.47251	114.199	0.50886	121.289	0.54384	116.845	1.28752	115.817	1.43581	121.279	1.32403	116.931	1.16815	121.283	1.24472	117.682	1.2063	121.279	2.98914	121.288	2.72537	121.279	2.79491	119.311	2.91418	121.279	3.03981	121.283	2.84184	121.279	4.74503
												115.067	0.54079	114.706	0.49168	108.77	0.45879	121.539	0.47271	114.44	0.50914	121.543	0.54432	117.091	1.29141	116.062	1.44002	121.536	1.32796	117.18	1.17223	121.538	1.2489	117.934	1.21075	121.536	2.99874	121.548	2.73495	121.536	2.80487	119.559	2.92357	121.536	3.05041	121.537	2.85115	121.537	4.75825
												115.311	0.542	114.951	0.49264	109	0.4592	121.795	0.47353	114.684	0.50993	121.804	0.54479	117.336	1.29503	116.31	1.44465	121.796	1.33204	117.422	1.17626	121.795	1.25289	118.178	1.21483	121.796	3.00772	121.802	2.74438	121.796	2.81455	119.815	2.93327	121.796	3.06052	121.795	2.8604	121.796	4.77093
												115.55	0.54241	115.188	0.49309	109.232	0.45996	122.051	0.47416	114.922	0.51047	122.055	0.54576	117.588	1.29899	116.55	1.44908	122.047	1.33597	117.674	1.18019	122.055	1.2572	118.43	1.21885	122.047	3.01671	122.06	2.75376	122.047	2.82425	120.066	2.94304	122.047	3.07077	122.054	2.86942	122.047	4.7843
												115.796	0.54325	115.433	0.49364	109.457	0.46052	122.309	0.47511	115.165	0.51107	122.315	0.5462	117.828	1.30293	116.798	1.45338	122.308	1.34005	117.918	1.18409	122.305	1.26121	118.677	1.22332	122.308	3.02538	122.319	2.76315	122.308	2.83383	120.318	2.95264	122.308	3.08077	122.305	2.87811	122.307	4.79689
												116.036	0.5437	115.674	0.49428	109.69	0.4611	122.562	0.4757	115.406	0.512	122.571	0.54717	118.08	1.30692	117.042	1.45794	122.561	1.344	118.167	1.18793	122.566	1.26543	118.925	1.22769	122.561	3.03423	122.57	2.77246	122.561	2.84354	120.572	2.96217	122.561	3.09104	122.566	2.88691	122.561	4.80956
												116.281	0.54414	115.915	0.49478	109.918	0.46178	122.82	0.47618	115.647	0.51243	122.826	0.54759	118.326	1.31119	117.286	1.46222	122.818	1.34778	118.416	1.19217	122.819	1.26985	119.178	1.23208	122.818	3.04353	122.831	2.78132	122.819	2.85335	120.821	2.97169	122.819	3.10139	122.819	2.89633	122.818	4.82307
												116.524	0.54537	116.161	0.49572	110.148	0.46244	123.077	0.47728	115.892	0.51339	123.085	0.54827	118.571	1.31533	117.534	1.46714	123.077	1.35206	118.66	1.19639	123.077	1.27403	119.421	1.23631	123.077	3.05275	123.084	2.79052	123.077	2.8632	121.076	2.98155	123.077	3.11192	123.077	2.90564	123.077	4.8362
												116.764	0.5458	116.398	0.49637	110.38	0.46326	123.332	0.47745	116.128	0.51398	123.338	0.54907	118.822	1.3196	117.774	1.47179	123.329	1.35611	118.91	1.20069	123.335	1.27845	119.675	1.24041	123.329	3.06224	123.341	2.79989	123.329	2.87315	121.326	2.99153	123.329	3.12279	123.336	2.91488	123.329	4.85
												117.011	0.54672	116.644	0.4969	110.605	0.46402	123.591	0.47827	116.374	0.51441	123.596	0.54925	119.063	1.32382	118.023	1.47636	123.59	1.36013	119.155	1.20488	123.587	1.28269	119.921	1.24478	123.59	3.07148	123.6	2.8092	123.59	2.88289	121.58	3.00154	123.59	3.13303	123.587	2.92428	123.59	4.86302
												117.249	0.54766	116.884	0.49757	110.838	0.46449	123.844	0.47865	116.614	0.51513	123.853	0.55028	119.316	1.32795	118.266	1.48098	123.842	1.3642	119.403	1.20881	123.849	1.28695	120.17	1.24901	123.842	3.08071	123.852	2.81876	123.842	2.89285	121.834	3.01117	123.843	3.14344	123.848	2.93339	123.842	4.87587
												117.495	0.54781	117.126	0.4982	111.065	0.46533	124.102	0.47929	116.854	0.51574	124.107	0.55085	119.561	1.33228	118.511	1.48525	124.101	1.36826	119.651	1.213	124.101	1.2914	120.421	1.25337	124.101	3.09008	124.113	2.82809	124.101	2.9027	122.081	3.02103	124.101	3.15386	124.101	2.94265	124.101	4.8898
												117.738	0.54883	117.371	0.49909	111.296	0.46568	124.36	0.47998	117.099	0.51672	124.366	0.55163	119.807	1.33631	118.759	1.48976	124.359	1.37286	119.895	1.21679	124.36	1.29557	120.665	1.2577	124.359	3.09946	124.365	2.83753	124.359	2.91269	122.338	3.03049	124.359	3.16462	124.36	2.95191	124.359	4.90308
												117.979	0.54909	117.608	0.49965	111.527	0.4665	124.614	0.48078	117.335	0.51732	124.619	0.5524	120.057	1.34073	118.999	1.49448	124.612	1.377	120.146	1.22098	124.618	1.30032	120.92	1.26192	124.612	3.10942	124.624	2.84703	124.612	2.923	122.587	3.04003	124.612	3.17565	124.617	2.96132	124.612	4.91705
												118.224	0.55009	117.855	0.50012	111.752	0.46716	124.874	0.48145	117.581	0.51776	124.878	0.55292	120.299	1.34497	119.248	1.49907	124.871	1.38126	120.39	1.22512	124.871	1.30482	121.165	1.26644	124.871	3.11904	124.882	2.85669	124.871	2.93301	122.84	3.04974	124.871	3.18618	124.87	2.97098	124.871	4.93047
												118.464	0.55071	118.094	0.50099	111.986	0.46766	125.125	0.48216	117.821	0.51861	125.135	0.55391	120.549	1.34912	119.49	1.50378	125.125	1.38536	120.639	1.22922	125.13	1.30926	121.414	1.27067	125.125	3.12832	125.135	2.86652	125.125	2.94295	123.095	3.05954	125.125	3.19678	125.13	2.9804	125.125	4.94325
												118.708	0.55105	118.336	0.50148	112.212	0.46876	125.385	0.48252	118.062	0.51905	125.389	0.55411	120.796	1.35343	119.736	1.50833	125.382	1.38953	120.888	1.23341	125.384	1.31371	121.665	1.27518	125.382	3.13777	125.394	2.87623	125.383	2.95291	123.343	3.06957	125.383	3.20756	125.384	2.98964	125.382	4.95593
												118.952	0.55213	118.58	0.5023	112.443	0.46908	125.642	0.48347	118.305	0.51994	125.649	0.55507	121.042	1.35756	119.983	1.51333	125.641	1.39389	121.131	1.23765	125.641	1.31811	121.909	1.27939	125.641	3.14681	125.648	2.88574	125.641	2.96276	123.598	3.07907	125.642	3.21809	125.641	2.99895	125.642	4.96809
												119.192	0.55262	118.818	0.50263	112.675	0.46994	125.896	0.4839	118.543	0.52057	125.9	0.55562	121.293	1.36209	120.223	1.51806	125.893	1.39788	121.382	1.24173	125.9	1.32303	122.161	1.28377	125.893	3.15625	125.905	2.89516	125.893	2.97291	123.849	3.08888	125.893	3.22879	125.9	3.0081	125.893	4.98183
												119.438	0.55346	119.063	0.50327	112.9	0.47043	126.156	0.48472	118.787	0.52111	126.16	0.55626	121.534	1.36631	120.471	1.52274	126.154	1.40208	121.626	1.24599	126.151	1.32768	122.41	1.28835	126.154	3.16579	126.164	2.90448	126.153	2.98306	124.102	3.09884	126.154	3.23942	126.151	3.01754	126.153	4.99491
												119.677	0.55376	119.304	0.50415	113.132	0.47111	126.408	0.48546	119.028	0.52176	126.417	0.55743	121.785	1.37049	120.716	1.52734	126.407	1.40619	121.875	1.24998	126.412	1.33245	122.658	1.29283	126.407	3.17566	126.416	2.91423	126.407	2.99332	124.355	3.1088	126.407	3.25013	126.412	3.02693	126.407	5.00818
												119.922	0.55456	119.546	0.50465	113.36	0.47174	126.666	0.48592	119.268	0.52229	126.672	0.5577	122.031	1.37489	120.959	1.53187	126.665	1.4103	122.123	1.25421	126.666	1.337	122.91	1.29737	126.664	3.18564	126.676	2.92364	126.665	3.00346	124.604	3.11916	126.665	3.26103	126.665	3.03635	126.665	5.02154
												120.166	0.55549	119.791	0.50552	113.59	0.47194	126.924	0.48683	119.514	0.52297	126.931	0.55836	122.277	1.37911	121.207	1.53675	126.923	1.4149	122.368	1.2582	126.923	1.34147	123.153	1.30199	126.923	3.19516	126.93	2.93317	126.923	3.01353	124.86	3.12938	126.923	3.27168	126.924	3.04604	126.923	5.03427
												120.405	0.55604	120.027	0.50617	113.822	0.47303	127.178	0.4873	119.749	0.52372	127.184	0.55913	122.528	1.38375	121.448	1.54173	127.175	1.41942	122.618	1.2625	127.182	1.34623	123.406	1.3065	127.174	3.20526	127.188	2.94263	127.175	3.02395	125.11	3.13972	127.175	3.28263	127.181	3.05577	127.175	5.04825
												120.653	0.55638	120.274	0.50678	114.047	0.47351	127.437	0.48796	119.995	0.52421	127.442	0.55958	122.769	1.38793	121.696	1.54606	127.436	1.42362	122.863	1.26691	127.433	1.35089	123.653	1.31081	127.437	3.21505	127.446	2.95231	127.436	3.03411	125.363	3.15002	127.437	3.29356	127.433	3.06565	127.437	5.06167
												120.89	0.55748	120.514	0.50751	114.281	0.47447	127.69	0.4886	120.235	0.52495	127.699	0.56052	123.021	1.39226	121.94	1.55073	127.688	1.42789	123.111	1.2712	127.695	1.35543	123.901	1.3152	127.688	3.22519	127.698	2.96227	127.688	3.04464	125.618	3.15992	127.689	3.30493	127.695	3.07514	127.688	5.07512
												121.136	0.55803	120.756	0.5079	114.508	0.4752	127.949	0.48871	120.477	0.52537	127.953	0.56102	123.266	1.39669	122.184	1.55486	127.947	1.43187	123.36	1.27561	127.947	1.36037	124.154	1.31995	127.947	3.23551	127.96	2.97185	127.947	3.05498	125.865	3.17013	127.948	3.3161	127.947	3.0848	127.947	5.08878
												121.379	0.5591	121.001	0.5087	114.737	0.47576	128.206	0.48981	120.721	0.5263	128.212	0.56168	123.512	1.40102	122.432	1.55962	128.205	1.43623	123.603	1.27993	128.206	1.36496	124.397	1.32443	128.205	3.24549	128.212	2.98175	128.205	3.06528	126.121	3.18008	128.205	3.3272	128.206	3.09477	128.205	5.10181
												121.62	0.55951	121.238	0.50936	114.969	0.47656	128.459	0.49013	120.957	0.52684	128.466	0.56247	123.762	1.40577	122.672	1.56411	128.457	1.44042	123.854	1.28429	128.464	1.36987	124.651	1.32878	128.457	3.2557	128.471	2.99153	128.457	3.07561	126.371	3.19023	128.458	3.33821	128.464	3.1046	128.457	5.11553
												121.865	0.56039	121.484	0.50981	115.194	0.47699	128.72	0.49112	121.203	0.52772	128.724	0.56301	124.004	1.41012	122.921	1.56834	128.717	1.44471	124.099	1.28867	128.716	1.37459	124.897	1.33345	128.717	3.26535	128.728	3.00144	128.717	3.08566	126.625	3.20058	128.717	3.34886	128.715	3.11472	128.717	5.12841
												122.105	0.56114	121.724	0.51081	115.428	0.47775	128.971	0.49194	121.442	0.52848	128.981	0.56383	124.255	1.41467	123.163	1.57305	128.971	1.44912	124.347	1.29292	128.975	1.37931	125.146	1.3379	128.972	3.27526	128.98	3.01124	128.971	3.09601	126.878	3.21044	128.972	3.3598	128.975	3.1241	128.972	5.14127
												122.349	0.56143	121.966	0.51114	115.654	0.47843	129.231	0.49237	121.683	0.52886	129.235	0.56441	124.502	1.41926	123.408	1.57717	129.229	1.45333	124.596	1.29737	129.23	1.38394	125.398	1.34246	129.229	3.28541	129.24	3.02065	129.229	3.10666	127.127	3.22073	129.229	3.37107	129.23	3.13379	129.229	5.1547
												122.594	0.56224	122.211	0.51204	115.885	0.47878	129.488	0.49325	121.927	0.52998	129.495	0.5652	124.747	1.42335	123.656	1.58198	129.488	1.45772	124.839	1.3016	129.487	1.38849	125.641	1.34709	129.488	3.29509	129.494	3.03031	129.488	3.11711	127.382	3.23062	129.488	3.38184	129.487	3.1437	129.488	5.16736
												122.833	0.56261	122.448	0.51265	116.116	0.47957	129.742	0.49371	122.164	0.53018	129.747	0.56589	124.999	1.42775	123.896	1.58658	129.74	1.46196	125.09	1.30585	129.747	1.39336	125.894	1.35176	129.74	3.30529	129.752	3.04011	129.74	3.12729	127.633	3.24084	129.739	3.39263	129.747	3.15318	129.74	5.1807
												123.08	0.56348	122.693	0.51327	116.342	0.47994	130.002	0.49459	122.409	0.53109	130.006	0.5664	125.239	1.43208	124.145	1.59117	130	1.46618	125.334	1.31024	129.998	1.39801	126.141	1.35652	130	3.31501	130.011	3.0497	130	3.13743	127.885	3.25114	130	3.40317	129.998	3.16247	130	5.19344
												123.319	0.5642	122.934	0.51371	116.574	0.48079	130.255	0.49515	122.65	0.53118	130.263	0.56702	125.491	1.43648	124.388	1.59591	130.253	1.47062	125.584	1.31441	130.258	1.40263	126.389	1.36113	130.253	3.32471	130.263	3.05959	130.253	3.14782	128.139	3.26105	130.253	3.41404	130.258	3.17164	130.253	5.206
												123.564	0.5649	123.176	0.51419	116.803	0.48155	130.513	0.49562	122.89	0.53213	130.517	0.56736	125.736	1.44098	124.632	1.60062	130.511	1.47475	125.832	1.31918	130.512	1.40738	126.642	1.36584	130.511	3.33474	130.523	3.06903	130.511	3.1584	128.388	3.27117	130.511	3.42488	130.511	3.18093	130.511	5.21909
												123.807	0.56565	123.42	0.5151	117.032	0.48192	130.77	0.49661	123.135	0.53281	130.777	0.5682	125.982	1.44538	124.88	1.6056	130.769	1.47922	126.076	1.32339	130.769	1.41202	126.885	1.37035	130.769	3.34468	130.776	3.07852	130.77	3.16897	128.644	3.28133	130.77	3.43542	130.769	3.19038	130.769	5.23207
												124.047	0.56616	123.658	0.5158	117.265	0.48274	131.024	0.49702	123.372	0.53332	131.03	0.56882	126.233	1.44984	125.12	1.61026	131.021	1.48367	126.327	1.32776	131.028	1.41702	127.139	1.37489	131.021	3.35515	131.034	3.08829	131.021	3.17963	128.893	3.29151	131.021	3.44663	131.028	3.20017	131.021	5.24578
												124.293	0.56698	123.904	0.51658	117.489	0.48337	131.283	0.49784	123.617	0.53417	131.288	0.56946	126.474	1.45417	125.37	1.61504	131.283	1.48808	126.571	1.33226	131.279	1.42187	127.385	1.3796	131.283	3.36496	131.293	3.09795	131.283	3.18994	129.147	3.30195	131.283	3.45741	131.279	3.21038	131.283	5.25853
												124.532	0.56778	124.144	0.51719	117.723	0.48406	131.536	0.4983	123.857	0.53454	131.546	0.57027	126.726	1.45858	125.613	1.61971	131.535	1.49246	126.819	1.33674	131.542	1.42675	127.634	1.38435	131.535	3.37475	131.544	3.10783	131.535	3.20018	129.401	3.31216	131.535	3.46812	131.542	3.22012	131.535	5.27138
												124.777	0.56828	124.386	0.51744	117.949	0.48488	131.794	0.49885	124.098	0.53533	131.8	0.57092	126.971	1.46326	125.857	1.62416	131.793	1.49677	127.068	1.34132	131.793	1.43171	127.885	1.38917	131.793	3.38476	131.806	3.11733	131.793	3.21058	129.649	3.32229	131.794	3.47914	131.793	3.22987	131.793	5.28477
												125.022	0.56912	124.631	0.51846	118.179	0.48553	132.052	0.49972	124.342	0.53604	132.058	0.57099	127.218	1.46751	126.105	1.62899	132.052	1.50138	127.312	1.34556	132.052	1.43637	128.129	1.39367	132.052	3.39472	132.058	3.12704	132.052	3.22141	129.905	3.33171	132.052	3.4901	132.052	3.23947	132.052	5.2974
												125.261	0.56961	124.868	0.51886	118.411	0.48642	132.306	0.50028	124.579	0.53681	132.312	0.57193	127.468	1.47226	126.345	1.63359	132.304	1.50581	127.563	1.35023	132.31	1.44149	128.383	1.39822	132.304	3.405	132.316	3.1369	132.304	3.23187	130.154	3.34136	132.304	3.50118	132.31	3.2492	132.304	5.31081
												125.507	0.57045	125.114	0.51953	118.636	0.48706	132.566	0.50106	124.823	0.53722	132.569	0.57273	127.71	1.4768	126.594	1.63836	132.563	1.51017	127.807	1.35477	132.562	1.44631	128.628	1.40315	132.563	3.41495	132.574	3.14665	132.563	3.24209	130.408	3.35129	132.564	3.5118	132.562	3.25917	132.563	5.32361
												125.747	0.57125	125.354	0.52043	118.87	0.4874	132.818	0.50194	125.064	0.53818	132.828	0.57375	127.96	1.48125	126.837	1.64325	132.817	1.51461	128.055	1.3592	132.822	1.45139	128.878	1.40764	132.818	3.42496	132.827	3.15672	132.818	3.25242	130.662	3.36125	132.818	3.52237	132.822	3.26866	132.818	5.33642
												125.991	0.57153	125.596	0.52076	119.097	0.48831	133.077	0.50247	125.305	0.53819	133.081	0.57406	128.207	1.48591	127.081	1.64787	133.075	1.51886	128.304	1.36374	133.076	1.45622	129.129	1.41245	133.075	3.43492	133.086	3.1664	133.075	3.26248	130.91	3.37128	133.075	3.53262	133.076	3.27802	133.075	5.34864
												126.235	0.57264	125.84	0.52148	119.327	0.48866	133.333	0.50329	125.549	0.5392	133.342	0.57478	128.452	1.49011	127.329	1.65256	133.334	1.52345	128.547	1.36812	133.333	1.46079	129.373	1.41706	133.334	3.44433	133.341	3.17595	133.334	3.27217	131.167	3.38105	133.334	3.543	133.334	3.28728	133.334	5.35997
												126.475	0.57322	126.078	0.522	119.559	0.48989	133.588	0.50362	125.786	0.53982	133.593	0.57554	128.704	1.49483	127.569	1.65715	133.585	1.52767	128.798	1.37268	133.593	1.46569	129.626	1.42177	133.585	3.45433	133.598	3.18546	133.585	3.28247	131.416	3.39054	133.586	3.55374	133.593	3.29642	133.585	5.37275
												126.721	0.57393	126.323	0.52271	119.784	0.49026	133.848	0.50449	126.03	0.54054	133.853	0.57605	128.945	1.49934	127.817	1.66194	133.846	1.5321	129.042	1.37757	133.844	1.47036	129.873	1.42662	133.846	3.4641	133.857	3.19446	133.846	3.29247	131.669	3.40042	133.846	3.56443	133.844	3.30576	133.846	5.38502
												126.96	0.57451	126.565	0.52356	120.017	0.49111	134.101	0.50506	126.271	0.54133	134.109	0.57698	129.196	1.50377	128.061	1.66702	134.099	1.5366	129.292	1.38192	134.105	1.47542	130.121	1.43122	134.1	3.47413	134.108	3.20384	134.099	3.30273	131.923	3.40993	134.099	3.57528	134.104	3.31511	134.1	5.39789
												127.205	0.57488	126.805	0.52398	120.244	0.49164	134.359	0.50559	126.511	0.54152	134.364	0.5775	129.442	1.5085	128.306	1.67168	134.357	1.54093	129.54	1.38653	134.358	1.48048	130.374	1.43641	134.357	3.48423	134.369	3.2133	134.357	3.31284	132.171	3.42014	134.357	3.58567	134.358	3.32483	134.357	5.41084
												127.449	0.57586	127.051	0.52496	120.474	0.49217	134.616	0.50648	126.757	0.54257	134.623	0.5784	129.688	1.51293	128.553	1.67663	134.615	1.54554	129.784	1.39106	134.616	1.48537	130.617	1.4412	134.616	3.49377	134.622	3.22299	134.616	3.32268	132.428	3.43037	134.616	3.59591	134.616	3.3343	134.616	5.42245
												127.688	0.57659	127.288	0.52546	120.707	0.49303	134.87	0.50691	126.993	0.54328	134.876	0.5788	129.938	1.51774	128.793	1.68132	134.867	1.54994	130.034	1.39575	134.874	1.49047	130.871	1.44583	134.867	3.50375	134.88	3.2324	134.867	3.33299	132.677	3.44029	134.867	3.60659	134.874	3.34335	134.867	5.43495
												127.936	0.57721	127.535	0.52598	120.931	0.49353	135.129	0.50775	127.239	0.54378	135.135	0.57931	130.18	1.5225	129.043	1.68616	135.128	1.55435	130.279	1.40045	135.126	1.49539	131.117	1.4507	135.128	3.51368	135.138	3.24147	135.129	3.34298	132.93	3.45021	135.129	3.61719	135.126	3.3528	135.129	5.44685
												128.173	0.57811	127.774	0.52671	121.164	0.49428	135.383	0.50822	127.478	0.54455	135.392	0.58035	130.431	1.52696	129.286	1.69129	135.381	1.55901	130.527	1.40504	135.387	1.50024	131.366	1.45535	135.381	3.52377	135.39	3.25113	135.381	3.35335	133.185	3.45946	135.381	3.62789	135.387	3.36212	135.381	5.45932
												128.419	0.57842	128.016	0.52735	121.392	0.49495	135.641	0.50881	127.719	0.54486	135.645	0.58069	130.676	1.5319	129.53	1.6963	135.64	1.56348	130.776	1.40988	135.64	1.50538	131.617	1.46022	135.64	3.53422	135.652	3.26049	135.64	3.36382	133.432	3.46905	135.64	3.63918	135.639	3.37166	135.64	5.47271
												128.662	0.57932	128.261	0.52822	121.621	0.49564	135.898	0.50978	127.964	0.54588	135.905	0.58166	130.923	1.53642	129.778	1.7015	135.897	1.56802	131.019	1.41456	135.898	1.51034	131.86	1.46507	135.897	3.5441	135.904	3.27021	135.897	3.37398	133.689	3.47865	135.898	3.65003	135.898	3.38126	135.897	5.48453
												128.903	0.57975	128.498	0.52883	121.853	0.49655	136.152	0.51003	128.201	0.54642	136.158	0.58218	131.173	1.54127	130.018	1.70652	136.15	1.57237	131.271	1.41943	136.156	1.51564	132.114	1.46993	136.15	3.55398	136.163	3.28017	136.15	3.38399	133.938	3.48878	136.15	3.6606	136.156	3.39087	136.15	5.49669
												129.148	0.58061	128.744	0.52928	122.078	0.49723	136.412	0.51073	128.446	0.54707	136.417	0.58295	131.415	1.54604	130.267	1.71146	136.409	1.57672	131.514	1.4242	136.408	1.5205	132.36	1.47505	136.41	3.56291	136.421	3.28983	136.41	3.39368	134.192	3.49868	136.41	3.6707	136.408	3.40027	136.409	5.50784
												129.388	0.58138	128.984	0.52997	122.312	0.49776	136.664	0.51143	128.685	0.54805	136.674	0.58361	131.666	1.55098	130.51	1.71678	136.663	1.58119	131.763	1.429	136.668	1.52555	132.61	1.47992	136.663	3.57243	136.673	3.29945	136.663	3.40361	134.445	3.50791	136.664	3.68118	136.668	3.40912	136.663	5.51947
												129.632	0.58179	129.226	0.53042	122.539	0.49849	136.923	0.51205	128.926	0.54845	136.927	0.58412	131.912	1.55596	130.754	1.72167	136.921	1.58555	132.013	1.43401	136.922	1.53075	132.861	1.48519	136.921	3.58221	136.932	3.3087	136.921	3.41374	134.694	3.5175	136.921	3.69167	136.922	3.41776	136.921	5.53166
												129.877	0.58287	129.47	0.53131	122.769	0.49881	137.18	0.51299	129.171	0.54918	137.188	0.58483	132.157	1.56072	131.002	1.72699	137.18	1.59021	132.255	1.43899	137.18	1.53569	133.105	1.49011	137.18	3.59184	137.186	3.31798	137.18	3.42381	134.949	3.52721	137.181	3.70226	137.18	3.42707	137.18	5.5433
												130.117	0.58335	129.708	0.53181	123.001	0.49957	137.435	0.51335	129.407	0.5499	137.439	0.58569	132.409	1.56567	131.242	1.73209	137.432	1.59474	132.507	1.44394	137.439	1.54074	133.358	1.49527	137.432	3.60183	137.444	3.32748	137.432	3.43414	135.199	3.53716	137.432	3.71306	137.438	3.43632	137.432	5.55571
												130.362	0.58408	129.953	0.53259	123.226	0.50019	137.694	0.5142	129.652	0.5506	137.699	0.58627	132.65	1.57048	131.49	1.73717	137.693	1.59933	132.75	1.44901	137.691	1.54577	133.605	1.50064	137.693	3.6111	137.704	3.33669	137.693	3.44423	135.452	3.54734	137.693	3.72325	137.69	3.44565	137.692	5.56671
												130.601	0.58482	130.195	0.53331	123.458	0.50095	137.947	0.51491	129.893	0.55139	137.956	0.58709	132.902	1.57521	131.734	1.74234	137.945	1.60395	132.999	1.45383	137.951	1.55085	133.854	1.50558	137.945	3.62057	137.955	3.34627	137.945	3.45413	135.707	3.55718	137.946	3.7336	137.951	3.45466	137.945	5.57779
												130.846	0.58524	130.436	0.53381	123.686	0.50173	138.205	0.5155	130.133	0.55199	138.21	0.58731	133.147	1.58028	131.979	1.74707	138.203	1.60842	133.248	1.45896	138.204	1.55596	134.106	1.51088	138.203	3.63013	138.216	3.35557	138.203	3.46403	135.955	3.5671	138.204	3.74379	138.204	3.46335	138.203	5.58943
												131.09	0.58635	130.681	0.5347	123.916	0.50213	138.462	0.51635	130.378	0.55255	138.469	0.58828	133.394	1.58515	132.227	1.75234	138.462	1.61302	133.492	1.46375	138.462	1.56097	134.349	1.51586	138.461	3.6398	138.468	3.36488	138.462	3.47386	136.211	3.57658	138.462	3.75407	138.462	3.47231	138.462	5.60068
												131.33	0.58661	130.918	0.53512	124.149	0.50286	138.717	0.51686	130.614	0.55304	138.722	0.58886	133.644	1.59032	132.466	1.75743	138.713	1.61766	133.742	1.46879	138.72	1.56632	134.602	1.52097	138.713	3.65018	138.726	3.37407	138.713	3.48433	136.46	3.58659	138.713	3.76494	138.72	3.48149	138.713	5.61333
												131.577	0.5873	131.164	0.53575	124.373	0.50327	138.976	0.5176	130.86	0.55383	138.98	0.58936	133.886	1.59595	132.716	1.76244	138.975	1.62247	133.987	1.47391	138.972	1.5715	134.849	1.52619	138.975	3.66005	138.985	3.38344	138.975	3.49469	136.714	3.59689	138.975	3.77585	138.972	3.49114	138.975	5.62537
												131.815	0.5881	131.404	0.5366	124.607	0.50399	139.229	0.5182	131.1	0.55439	139.237	0.59029	134.137	1.60144	132.958	1.76784	139.227	1.62731	134.236	1.47887	139.234	1.57667	135.098	1.53141	139.227	3.66973	139.236	3.39332	139.227	3.50494	136.968	3.60712	139.227	3.78669	139.233	3.50038	139.227	5.63729
												132.06	0.5886	131.646	0.53702	124.834	0.50474	139.487	0.51851	131.341	0.55493	139.492	0.59066	134.381	1.60658	133.203	1.77282	139.486	1.63178	134.484	1.48404	139.485	1.58203	135.349	1.53671	139.486	3.67946	139.498	3.40288	139.486	3.51503	137.216	3.61766	139.486	3.79771	139.485	3.51013	139.486	5.6493
												132.304	0.58943	131.891	0.5378	125.063	0.50534	139.744	0.51944	131.586	0.55568	139.751	0.59155	134.628	1.61144	133.451	1.77807	139.744	1.6366	134.727	1.48887	139.744	1.58709	135.592	1.54203	139.743	3.68898	139.75	3.41253	139.743	3.52518	137.472	3.62767	139.744	3.80852	139.744	3.51948	139.743	5.66067
												132.544	0.58992	132.128	0.53843	125.296	0.50623	139.998	0.5198	131.822	0.55643	140.004	0.59206	134.879	1.61673	133.691	1.78324	139.996	1.64111	134.978	1.49404	140.002	1.59274	135.846	1.54715	139.996	3.69926	140.009	3.42203	139.996	3.5357	137.721	3.63754	139.996	3.81953	140.002	3.5289	139.996	5.67327
												132.79	0.59071	132.374	0.53895	125.52	0.50658	140.259	0.52056	132.067	0.55682	140.263	0.59276	135.121	1.62158	133.94	1.78828	140.256	1.6459	135.222	1.49912	140.255	1.59795	136.092	1.55239	140.256	3.70933	140.266	3.43158	140.256	3.54577	137.975	3.64765	140.256	3.83027	140.254	3.53865	140.256	5.68494
												133.03	0.59144	132.614	0.53991	125.754	0.50729	140.51	0.52138	132.307	0.55806	140.52	0.59364	135.371	1.62658	134.183	1.79362	140.51	1.65071	135.471	1.50399	140.515	1.60346	136.342	1.55734	140.51	3.71967	140.519	3.44135	140.51	3.55643	138.229	3.65756	140.51	3.8414	140.514	3.54821	140.51	5.69696
												133.274	0.59198	132.856	0.54041	125.981	0.50805	140.77	0.5219	132.548	0.55821	140.773	0.59429	135.618	1.63202	134.427	1.79853	140.767	1.65548	135.721	1.50908	140.768	1.60896	136.593	1.56277	140.767	3.73002	140.779	3.45101	140.767	3.567	138.477	3.66773	140.768	3.85272	140.768	3.55779	140.767	5.70877
												133.517	0.59284	133.101	0.54116	126.211	0.50842	141.026	0.52276	132.792	0.55929	141.035	0.59512	135.863	1.63708	134.675	1.80376	141.026	1.66047	135.964	1.51397	141.026	1.61425	136.837	1.56784	141.026	3.73981	141.033	3.46109	141.026	3.57685	138.733	3.67768	141.027	3.86316	141.026	3.56777	141.026	5.71901
												133.758	0.59325	133.339	0.54167	126.443	0.50922	141.281	0.52307	133.03	0.55959	141.286	0.59583	136.114	1.64234	134.915	1.80906	141.277	1.66525	136.215	1.51913	141.285	1.61983	137.09	1.57276	141.277	3.74983	141.29	3.471	141.277	3.58702	138.983	3.68741	141.278	3.87368	141.284	3.57708	141.278	5.73038
												134.003	0.59398	133.583	0.54225	126.668	0.50979	141.54	0.52397	133.274	0.56038	141.545	0.59622	136.356	1.64751	135.163	1.81432	141.539	1.6701	136.459	1.52443	141.536	1.62517	137.336	1.57808	141.539	3.75982	141.549	3.48033	141.539	3.5973	139.236	3.69752	141.539	3.8844	141.536	3.58643	141.539	5.74121
												134.243	0.59488	133.825	0.54301	126.901	0.51035	141.793	0.52479	133.515	0.5612	141.801	0.59709	136.607	1.65241	135.407	1.81953	141.792	1.67479	136.707	1.52926	141.797	1.63065	137.586	1.58324	141.791	3.77008	141.801	3.48995	141.791	3.60782	139.491	3.70727	141.792	3.89543	141.797	3.59583	141.791	5.75198
												134.488	0.59562	134.066	0.54353	127.129	0.51126	142.051	0.52521	133.755	0.56165	142.056	0.59744	136.853	1.65751	135.651	1.8244	142.05	1.67948	136.956	1.5345	142.05	1.63613	137.837	1.58863	142.05	3.78018	142.062	3.49936	142.05	3.61844	139.738	3.7172	142.05	3.90659	142.05	3.60525	142.05	5.76391
												134.732	0.5964	134.311	0.54447	127.358	0.51162	142.309	0.52634	133.999	0.56222	142.315	0.59826	137.098	1.6622	135.9	1.82983	142.308	1.68449	137.2	1.53937	142.309	1.64161	138.081	1.59376	142.308	3.78987	142.315	3.5093	142.308	3.6288	139.995	3.72699	142.308	3.91753	142.308	3.61491	142.308	5.77428
												134.971	0.59672	134.548	0.54489	127.591	0.51248	142.562	0.52673	134.237	0.56299	142.569	0.59896	137.349	1.66742	136.139	1.83515	142.56	1.68947	137.45	1.54458	142.566	1.64708	138.334	1.59898	142.56	3.80006	142.573	3.51934	142.559	3.63928	140.244	3.73717	142.56	3.92853	142.566	3.62443	142.56	5.78511
												135.218	0.59756	134.794	0.54571	127.815	0.51314	142.822	0.52743	134.482	0.56344	142.827	0.59942	137.591	1.67248	136.389	1.84049	142.821	1.69415	137.695	1.55006	142.818	1.65259	138.58	1.6044	142.821	3.80968	142.831	3.52903	142.821	3.6493	140.497	3.74737	142.821	3.93901	142.818	3.63397	142.821	5.79483
												135.457	0.59843	135.034	0.54637	128.049	0.51399	143.075	0.528	134.722	0.56427	143.084	0.60048	137.842	1.67742	136.631	1.84598	143.073	1.6991	137.943	1.55501	143.079	1.65819	138.829	1.60965	143.073	3.81948	143.083	3.53896	143.073	3.65959	140.752	3.75663	143.073	3.94938	143.079	3.64317	143.073	5.8045
												135.702	0.59853	135.276	0.54693	128.275	0.51465	143.333	0.52868	134.962	0.5649	143.338	0.60054	138.087	1.68268	136.876	1.85098	143.332	1.70398	138.193	1.56032	143.331	1.66388	139.081	1.61511	143.332	3.82956	143.344	3.54816	143.332	3.67002	141	3.76636	143.332	3.96012	143.331	3.65237	143.332	5.81486
												135.945	0.59952	135.521	0.54781	128.506	0.51515	143.591	0.52946	135.207	0.56567	143.597	0.60143	138.334	1.68764	137.124	1.85636	143.59	1.70925	138.436	1.56556	143.59	1.6691	139.325	1.62026	143.59	3.83957	143.595	3.5575	143.59	3.68031	141.256	3.77589	143.59	3.97103	143.59	3.66193	143.59	5.8243
												136.186	0.59997	135.758	0.54826	128.738	0.516	143.844	0.52987	135.444	0.56629	143.85	0.60192	138.584	1.69283	137.364	1.86177	143.842	1.71387	138.687	1.5709	143.848	1.67459	139.578	1.62568	143.842	3.84973	143.855	3.5673	143.842	3.69084	141.505	3.78525	143.842	3.98224	143.848	3.67156	143.842	5.83412
												136.431	0.60101	136.004	0.54896	128.963	0.51651	144.105	0.53068	135.689	0.56686	144.109	0.60271	138.826	1.69796	137.613	1.86683	144.102	1.71863	138.931	1.57623	144.101	1.67995	139.824	1.63116	144.102	3.85876	144.113	3.57693	144.102	3.70084	141.758	3.79505	144.103	3.99273	144.101	3.68114	144.102	5.84198
												136.671	0.60181	136.244	0.54971	129.197	0.51726	144.356	0.53164	135.929	0.56764	144.366	0.60374	139.076	1.70312	137.855	1.87229	144.356	1.72357	139.179	1.58147	144.361	1.68561	140.074	1.63659	144.356	3.86827	144.365	3.58685	144.356	3.71091	142.013	3.80457	144.356	4.00324	144.361	3.69016	144.356	5.84945
												136.915	0.60233	136.486	0.55014	129.423	0.51795	144.616	0.53193	136.17	0.56805	144.62	0.60402	139.323	1.70845	138.1	1.87736	144.613	1.7283	139.429	1.58696	144.614	1.6914	140.325	1.64217	144.613	3.87836	144.625	3.59598	144.613	3.72124	142.261	3.81477	144.613	4.01413	144.614	3.69944	144.613	5.85685
												137.159	0.60318	136.73	0.55105	129.653	0.51837	144.873	0.53285	136.414	0.569	144.88	0.60478	139.568	1.7136	138.347	1.88295	144.872	1.73349	139.672	1.59229	144.872	1.69669	140.569	1.64753	144.872	3.88768	144.879	3.60522	144.872	3.7309	142.517	3.82449	144.872	4.02425	144.872	3.70877	144.872	5.86242
												137.399	0.60367	136.968	0.55155	129.885	0.51923	145.127	0.53327	136.651	0.56951	145.132	0.60551	139.82	1.71886	138.588	1.88833	145.124	1.73836	139.923	1.59774	145.131	1.70215	140.821	1.65297	145.124	3.89736	145.136	3.61495	145.124	3.74066	142.766	3.83414	145.124	4.03448	145.131	3.71764	145.124	5.86819
												137.644	0.60453	137.213	0.55233	130.11	0.51956	145.386	0.53396	136.895	0.57031	145.391	0.606	140.061	1.72404	138.836	1.89385	145.384	1.74322	140.166	1.60324	145.382	1.70757	141.069	1.65849	145.384	3.90686	145.395	3.6241	145.384	3.75068	143.019	3.84399	145.384	4.04493	145.382	3.72682	145.384	5.87201
												137.885	0.6053	137.455	0.55305	130.343	0.52055	145.639	0.53469	137.137	0.57077	145.648	0.60687	140.312	1.72931	139.08	1.89919	145.638	1.74838	140.416	1.60838	145.643	1.71313	141.317	1.66362	145.638	3.91665	145.647	3.63368	145.638	3.76118	143.275	3.85335	145.638	4.05582	145.643	3.73599	145.638	5.87495
												138.129	0.60586	137.696	0.55347	130.571	0.52116	145.897	0.53505	137.376	0.5715	145.903	0.60746	140.557	1.73451	139.324	1.90445	145.895	1.75314	140.664	1.61377	145.896	1.71876	141.57	1.66917	145.896	3.92652	145.907	3.64301	145.896	3.7718	143.523	3.86368	145.896	4.06662	145.896	3.74506	145.896	5.87644
												138.373	0.60689	137.94	0.5543	130.8	0.52169	146.154	0.5361	137.621	0.57232	146.162	0.60845	140.804	1.73946	139.573	1.90997	146.154	1.7582	140.908	1.61885	146.155	1.72419	141.813	1.67468	146.154	3.93611	146.161	3.65231	146.154	3.78193	143.778	3.87377	146.154	4.07693	146.154	3.75441	146.154	5.87439
												138.612	0.60754	138.178	0.55478	131.033	0.5227	146.409	0.53675	137.858	0.57291	146.415	0.60904	141.055	1.74491	139.812	1.91527	146.406	1.76306	141.159	1.62421	146.412	1.7299	142.066	1.6801	146.405	3.94617	146.419	3.66194	146.405	3.79223	144.028	3.88381	146.406	4.08797	146.412	3.76354	146.405	5.86862
												138.859	0.60817	138.424	0.55542	131.258	0.52333	146.668	0.53752	138.104	0.57373	146.673	0.60945	141.297	1.75024	140.061	1.92056	146.667	1.76783	141.403	1.62963	146.664	1.73547	142.312	1.6855	146.667	3.95593	146.677	3.67116	146.666	3.80222	144.281	3.89373	146.667	4.09864	146.664	3.77273	146.667	5.85534
												139.098	0.60884	138.664	0.5563	131.491	0.52395	146.921	0.53816	138.343	0.5745	146.929	0.61051	141.548	1.75534	140.304	1.92602	146.919	1.77303	141.652	1.63485	146.925	1.7411	142.562	1.69096	146.919	3.96582	146.929	3.68069	146.919	3.8125	144.536	3.90338	146.919	4.10948	146.925	3.78187	146.919	5.83263
												139.343	0.60935	138.906	0.5568	131.718	0.52478	147.18	0.53894	138.584	0.57504	147.184	0.61084	141.792	1.76056	140.549	1.93153	147.178	1.77802	141.901	1.64043	147.178	1.74695	142.813	1.6966	147.178	3.97618	147.19	3.6901	147.178	3.82322	144.783	3.91382	147.178	4.12064	147.178	3.79116	147.178	5.79147
												139.587	0.61032	139.152	0.55766	131.948	0.52516	147.437	0.53976	138.829	0.57565	147.443	0.61161	142.039	1.76566	140.797	1.9369	147.436	1.78321	142.144	1.64569	147.436	1.75255	143.057	1.7024	147.436	3.98617	147.442	3.69981	147.436	3.83367	145.04	3.92387	147.436	4.13172	147.436	3.80077	147.436	5.61164
												139.827	0.61098	139.388	0.55823	132.18	0.52619	147.69	0.54028	139.065	0.57628	147.696	0.61217	142.289	1.77125	141.036	1.94229	147.688	1.78827	142.394	1.65091	147.695	1.75836	143.311	1.70785	147.689	3.99614	147.701	3.7097	147.688	3.84398	145.288	3.93345	147.689	4.14248	147.695	3.81025	147.689	2.97435
												140.072	0.61176	139.634	0.55882	132.404	0.52699	147.951	0.5412	139.31	0.57662	147.955	0.61275	142.531	1.77661	141.286	1.94742	147.948	1.79333	142.639	1.65631	147.947	1.76381	143.555	1.71351	147.948	4.00533	147.959	3.71924	147.948	3.85409	145.542	3.94286	147.948	4.15292	147.947	3.81959	147.94	0.16622
												140.312	0.6125	139.874	0.55954	132.639	0.52756	148.203	0.54166	139.55	0.57778	148.212	0.61358	142.781	1.78192	141.528	1.95292	148.202	1.79841	142.888	1.66188	148.207	1.7695	143.805	1.71882	148.202	4.01504	148.212	3.72897	148.202	3.86429	145.796	3.95231	148.202	4.16368	148.206	3.82863	147.948	0.0307
												140.556	0.61312	140.116	0.55993	132.865	0.5283	148.462	0.54223	139.791	0.57806	148.465	0.61422	143.028	1.78715	141.773	1.95828	148.459	1.80336	143.137	1.66743	148.461	1.7754	144.057	1.72452	148.459	4.02528	148.471	3.7382	148.459	3.87495	146.045	3.96192	148.46	4.1748	148.46	3.83797
												140.8	0.61413	140.36	0.56078	133.096	0.52854	148.719	0.54311	140.035	0.57884	148.726	0.61488	143.274	1.79239	142.02	1.96392	148.718	1.80859	143.38	1.67276	148.718	1.78087	144.3	1.73005	148.718	4.03473	148.725	3.74789	148.719	3.88494	146.3	3.97169	148.719	4.18531	148.718	3.84748
												141.041	0.61432	140.598	0.56137	133.327	0.5294	148.973	0.54333	140.273	0.57936	148.978	0.61574	143.525	1.79784	142.261	1.96931	148.97	1.81352	143.631	1.67817	148.977	1.78676	144.553	1.73559	148.97	4.0444	148.983	3.75793	148.97	3.89507	146.55	3.98211	148.971	4.19574	148.977	3.85646
												141.286	0.6152	140.844	0.56216	133.553	0.52982	149.232	0.5441	140.517	0.57999	149.238	0.61626	143.766	1.80314	142.509	1.9749	149.231	1.81825	143.874	1.68366	149.228	1.79259	144.8	1.74137	149.231	4.05365	149.241	3.76723	149.231	3.90505	146.803	3.99221	149.231	4.20579	149.228	3.86556
												141.526	0.61586	141.084	0.5629	133.785	0.53084	149.485	0.54489	140.758	0.58061	149.494	0.61707	144.018	1.80847	142.753	1.98039	149.483	1.82351	144.124	1.68885	149.489	1.79821	145.049	1.74668	149.484	4.06314	149.493	3.77646	149.484	3.91508	147.058	4.00178	149.484	4.21644	149.489	3.87414
												141.77	0.61641	141.326	0.56332	134.013	0.53163	149.744	0.54556	140.998	0.58142	149.748	0.61761	144.263	1.81429	142.997	1.9858	149.742	1.82851	144.372	1.69448	149.742	1.804	145.301	1.75222	149.742	4.07282	149.754	3.78548	149.742	3.92509	147.305	4.0119	149.742	4.22713	149.742	3.88335
												142.014	0.61713	141.571	0.56424	134.242	0.53188	150	0.54636	141.243	0.58233	150.008	0.61832	144.51	1.81943	143.245	1.99149	150	1.83373	144.616	1.7	150	1.80967	145.544	1.75763	150	4.08238	150.007	3.79479	150	3.93512	147.562	4.02144	150.001	4.2378	150	3.89236
												142.254	0.61782	141.808	0.56489	134.475	0.53272	150.255	0.54677	141.48	0.58286	150.26	0.61916	144.76	1.82512	143.485	1.99711	150.252	1.83897	144.867	1.70563	150.259	1.81571	145.798	1.76315	150.252	4.09266	150.265	3.80421	150.252	3.94589	147.811	4.03125	150.252	4.24891	150.259	3.90123
												142.501	0.61848	142.054	0.56564	134.699	0.53336	150.514	0.54774	141.725	0.58335	150.519	0.61961	145.002	1.83059	143.734	2.0029	150.513	1.84407	145.111	1.71114	150.51	1.82141	146.044	1.76898	150.513	4.10227	150.523	3.81353	150.513	3.95615	148.065	4.04102	150.514	4.25944	150.51	3.91113
												142.739	0.61919	142.294	0.5662	134.933	0.53413	150.767	0.54856	141.965	0.58419	150.775	0.62053	145.252	1.83602	143.977	2.00886	150.765	1.84918	145.359	1.71639	150.772	1.82707	146.293	1.77454	150.765	4.11177	150.775	3.82334	150.765	3.96617	148.319	4.05082	150.765	4.26957	150.772	3.92049
												142.985	0.61964	142.536	0.56655	135.16	0.53489	151.025	0.54881	142.206	0.58464	151.03	0.62124	145.498	1.84154	144.222	2.01451	151.024	1.85415	145.608	1.72235	151.024	1.8331	146.545	1.78033	151.024	4.12162	151.036	3.83261	151.024	3.97621	148.567	4.06082	151.024	4.2802	151.024	3.92954
												143.227	0.62066	142.781	0.56764	135.391	0.53536	151.283	0.54977	142.45	0.58546	151.289	0.62194	145.744	1.84669	144.47	2.0201	151.282	1.85953	145.852	1.72792	151.283	1.83881	146.788	1.78588	151.282	4.13123	151.288	3.84176	151.282	3.98622	148.823	4.07031	151.282	4.29064	151.282	3.93862
												143.468	0.62123	143.018	0.56827	135.622	0.53618	151.537	0.55024	142.687	0.58598	151.543	0.62242	145.995	1.85232	144.709	2.02575	151.534	1.86472	146.103	1.73362	151.54	1.84469	147.042	1.79143	151.534	4.14136	151.547	3.85111	151.534	3.99678	149.072	4.07979	151.534	4.30228	151.54	3.9474
												143.714	0.62203	143.264	0.56893	135.847	0.53681	151.797	0.55103	142.932	0.58665	151.801	0.62298	146.237	1.85777	144.958	2.03124	151.794	1.86984	146.347	1.73943	151.793	1.85047	147.287	1.7972	151.794	4.15077	151.805	3.86028	151.794	4.0071	149.326	4.08912	151.794	4.31382	151.793	3.95676
												143.953	0.6226	143.504	0.56984	136.08	0.53728	152.049	0.55189	143.172	0.58747	152.058	0.62406	146.487	1.86353	145.201	2.03698	152.048	1.87518	146.596	1.7449	152.053	1.85632	147.537	1.80282	152.048	4.16039	152.057	3.86996	152.048	4.01747	149.58	4.09846	152.049	4.32459	152.052	3.96577
												144.198	0.62306	143.746	0.57004	136.307	0.53823	152.308	0.55224	143.413	0.58784	152.312	0.62462	146.734	1.86924	145.446	2.04256	152.306	1.88015	146.845	1.75069	152.307	1.86222	147.789	1.80856	152.306	4.17003	152.317	3.8793	152.305	4.02773	149.828	4.10877	152.306	4.33523	152.307	3.97515
												144.442	0.62409	143.99	0.57092	136.537	0.53849	152.565	0.55306	143.657	0.5888	152.572	0.6252	146.979	1.87466	145.694	2.04828	152.565	1.88553	147.088	1.75639	152.564	1.86788	148.033	1.81424	152.565	4.17924	152.572	3.88873	152.565	4.03735	150.084	4.119	152.565	4.34536	152.564	3.98427
												144.682	0.6245	144.228	0.57134	136.769	0.53961	152.819	0.55353	143.894	0.58926	152.824	0.62585	147.231	1.8801	145.934	2.05367	152.816	1.89061	147.339	1.76204	152.824	1.8739	148.285	1.82018	152.816	4.18893	152.829	3.89821	152.816	4.04737	150.333	4.1287	152.816	4.35598	152.823	3.99275
												144.928	0.62527	144.473	0.5722	136.994	0.54014	153.078	0.55419	144.138	0.58991	153.083	0.62649	147.471	1.88559	146.182	2.05944	153.077	1.89571	147.583	1.7677	153.075	1.87974	148.533	1.82593	153.077	4.19815	153.088	3.90727	153.077	4.05721	150.586	4.13851	153.077	4.36632	153.074	4.00158
												145.167	0.62602	144.715	0.57298	137.227	0.5408	153.331	0.55487	144.379	0.59067	153.34	0.62745	147.723	1.89118	146.426	2.06543	153.33	1.90095	147.832	1.77316	153.336	1.88552	148.781	1.83157	153.33	4.20783	153.339	3.91645	153.33	4.06749	150.841	4.14772	153.33	4.37734	153.336	4.01029
												145.412	0.62649	144.956	0.5734	137.455	0.54156	153.59	0.55551	144.62	0.59119	153.595	0.62785	147.969	1.89697	146.67	2.07095	153.588	1.90621	148.081	1.77898	153.588	1.89158	149.033	1.83745	153.588	4.21774	153.6	3.92538	153.588	4.07784	151.089	4.15772	153.589	4.38875	153.588	4.01947
												145.656	0.62757	145.201	0.5741	137.684	0.54197	153.846	0.55643	144.865	0.59203	153.854	0.62852	148.214	1.90242	146.919	2.07683	153.846	1.91144	148.324	1.78463	153.847	1.89749	149.276	1.84319	153.846	4.22716	153.853	3.9348	153.846	4.08773	151.345	4.16781	153.846	4.39973	153.847	4.02897
												145.895	0.62803	145.438	0.57479	137.917	0.543	154.101	0.55687	145.101	0.59251	154.107	0.62919	148.465	1.90814	147.158	2.08261	154.098	1.91673	148.574	1.79017	154.105	1.90356	149.53	1.84866	154.098	4.23696	154.111	3.94432	154.098	4.09822	151.595	4.178	154.098	4.41059	154.105	4.03812
												146.142	0.62891	145.685	0.57556	138.142	0.54354	154.36	0.55785	145.347	0.59324	154.365	0.62956	148.707	1.91384	147.407	2.08835	154.359	1.92193	148.82	1.79569	154.356	1.90956	149.776	1.85447	154.359	4.24631	154.37	3.95349	154.359	4.10822	151.848	4.1882	154.359	4.42083	154.356	4.04735
												146.38	0.62972	145.924	0.57629	138.375	0.54406	154.614	0.55843	145.586	0.59404	154.622	0.63059	148.958	1.91946	147.65	2.09412	154.611	1.92725	149.067	1.80133	154.617	1.91534	150.025	1.86025	154.611	4.25565	154.621	3.96312	154.611	4.11843	152.103	4.19753	154.612	4.43127	154.617	4.05618
												146.626	0.63016	146.166	0.57664	138.602	0.54486	154.871	0.55919	145.828	0.59464	154.876	0.63103	149.203	1.92535	147.895	2.09966	154.87	1.9325	149.317	1.80735	154.87	1.92134	150.277	1.86597	154.87	4.26594	154.882	3.97214	154.87	4.12896	152.35	4.20729	154.87	4.44213	154.87	4.06515
												146.869	0.63115	146.411	0.57745	138.832	0.54537	155.129	0.56006	146.072	0.59553	155.135	0.63192	149.45	1.93085	148.143	2.10548	155.129	1.93805	149.56	1.81295	155.128	1.92721	150.52	1.87191	155.128	4.27595	155.134	3.98132	155.129	4.13923	152.607	4.21672	155.129	4.45299	155.129	4.07489
												147.11	0.63156	146.648	0.57823	139.064	0.54656	155.383	0.56046	146.309	0.59602	155.389	0.6324	149.7	1.93682	148.383	2.11134	155.381	1.94357	149.811	1.81861	155.387	1.93347	150.774	1.8779	155.38	4.28623	155.393	3.99109	155.381	4.14988	152.856	4.22641	155.381	4.46416	155.387	4.08434
												147.355	0.63252	146.894	0.57886	139.289	0.54702	155.643	0.56141	146.553	0.5962	155.647	0.63301	149.942	1.9423	148.632	2.11697	155.64	1.94895	150.055	1.82407	155.639	1.93947	151.019	1.88379	155.64	4.29574	155.652	4.00052	155.641	4.15993	153.109	4.23646	155.641	4.47472	155.639	4.09422
												147.595	0.63351	147.134	0.57959	139.523	0.54769	155.895	0.56181	146.794	0.59763	155.905	0.63388	150.192	1.94783	148.874	2.12268	155.894	1.95425	150.304	1.82975	155.899	1.9455	151.27	1.88943	155.894	4.30533	155.904	4.01026	155.895	4.16992	153.363	4.24603	155.895	4.4857	155.898	4.10332
												147.839	0.63389	147.376	0.57992	139.749	0.54848	156.155	0.56217	147.034	0.59779	156.158	0.63449	150.439	1.95342	149.119	2.12823	156.152	1.95947	150.553	1.83539	156.153	1.95164	151.521	1.89533	156.151	4.31499	156.163	4.01925	156.152	4.1802	153.612	4.25558	156.152	4.49652	156.153	4.11225
												148.083	0.63492	147.621	0.58078	139.98	0.54875	156.41	0.56326	147.279	0.59862	156.418	0.63536	150.685	1.95905	149.366	2.13417	156.411	1.96484	150.796	1.84102	156.41	1.9575	151.764	1.90095	156.411	4.32395	156.417	4.02821	156.411	4.19007	153.867	4.26481	156.411	4.50674	156.41	4.12132
												148.323	0.63515	147.858	0.58135	140.211	0.54976	156.666	0.56373	147.516	0.59907	156.67	0.63591	150.936	1.96473	149.607	2.14003	156.663	1.97009	151.047	1.84659	156.669	1.96351	152.017	1.90674	156.662	4.33368	156.675	4.03754	156.663	4.20044	154.118	4.2744	156.663	4.51768	156.669	4.13011
												148.569	0.63604	148.104	0.58201	140.437	0.5502	156.925	0.56461	147.761	0.6	156.929	0.63627	151.176	1.9703	149.855	2.14577	156.923	1.97551	151.291	1.85223	156.921	1.96943	152.264	1.91236	156.923	4.34332	156.934	4.0465	156.923	4.21052	154.37	4.28456	156.924	4.52808	156.921	4.13955
												148.809	0.63651	148.345	0.58278	140.669	0.55125	157.177	0.56552	148.001	0.6008	157.186	0.63702	151.429	1.9758	150.099	2.15161	157.176	1.98083	151.54	1.85786	157.182	1.9755	152.513	1.91822	157.176	4.35271	157.185	4.056	157.176	4.22051	154.625	4.29427	157.176	4.53891	157.182	4.14852
												149.053	0.63715	148.586	0.58321	140.897	0.55193	157.436	0.56604	148.242	0.60099	157.441	0.63766	151.674	1.98148	150.343	2.15756	157.434	1.98598	151.789	1.86363	157.435	1.98157	152.766	1.92411	157.434	4.36225	157.446	4.06519	157.434	4.23041	154.873	4.30399	157.434	4.54953	157.434	4.15759
												149.297	0.6381	148.831	0.58405	141.127	0.5524	157.693	0.56715	148.486	0.60173	157.699	0.63873	151.92	1.98683	150.591	2.16362	157.693	1.99137	152.032	1.86907	157.693	1.98762	153.008	1.92984	157.692	4.3716	157.699	4.07425	157.692	4.24026	155.129	4.31365	157.693	4.55979	157.692	4.16662
												149.537	0.63848	149.068	0.58459	141.359	0.55334	157.947	0.56722	148.723	0.60258	157.953	0.63931	152.171	1.99269	150.831	2.16948	157.944	1.99673	152.282	1.87487	157.951	1.99377	153.262	1.93559	157.944	4.38161	157.957	4.08337	157.944	4.25044	155.378	4.32329	157.944	4.57063	157.951	4.17538
												149.783	0.63925	149.315	0.58535	141.584	0.55375	158.207	0.56824	148.969	0.60318	158.212	0.63972	152.412	1.99832	151.08	2.17547	158.206	2.0021	152.528	1.88051	158.202	1.99971	153.508	1.94108	158.206	4.39109	158.215	4.09244	158.205	4.26035	155.632	4.33282	158.206	4.58105	158.202	4.18459
												150.022	0.64024	149.554	0.58607	141.817	0.5546	158.459	0.56895	149.208	0.604	158.468	0.64083	152.663	2.00388	151.323	2.1816	158.457	2.00754	152.776	1.8859	158.464	2.0058	153.757	1.94668	158.457	4.40075	158.467	4.10208	158.457	4.27062	155.886	4.34207	158.457	4.59182	158.464	4.19373
												150.267	0.64061	149.796	0.58643	142.044	0.55547	158.717	0.56951	149.449	0.60461	158.723	0.64143	152.909	2.00992	151.568	2.1875	158.717	2.01285	153.024	1.89177	158.716	2.01215	154.009	1.95251	158.716	4.41052	158.729	4.11106	158.716	4.28095	156.133	4.35189	158.717	4.6026	158.716	4.20291
												150.511	0.64158	150.041	0.58749	142.274	0.55587	158.975	0.57019	149.694	0.6052	158.982	0.64214	153.155	2.01566	151.816	2.19357	158.974	2.01838	153.268	1.89744	158.975	2.01813	154.252	1.95833	158.974	4.41949	158.98	4.1202	158.974	4.29054	156.39	4.36128	158.974	4.61286	158.975	4.21187
												150.751	0.64202	150.279	0.58811	142.506	0.55693	159.229	0.57103	149.93	0.60586	159.235	0.64269	153.406	2.02176	152.055	2.19948	159.226	2.02355	153.519	1.90337	159.233	2.02435	154.506	1.96415	159.226	4.42889	159.24	4.12957	159.226	4.30054	156.639	4.37056	159.226	4.62324	159.233	4.22058
												150.997	0.64299	150.524	0.58866	142.731	0.55717	159.49	0.57207	150.175	0.60636	159.493	0.64336	153.647	2.02752	152.304	2.2054	159.486	2.02875	153.763	1.90908	159.485	2.03	154.751	1.97013	159.486	4.43774	159.497	4.139	159.486	4.31024	156.893	4.37973	159.486	4.63328	159.485	4.22962
												151.236	0.64372	150.765	0.5895	142.965	0.55778	159.741	0.57217	150.415	0.60722	159.751	0.64436	153.898	2.03318	152.547	2.21144	159.741	2.03416	154.012	1.91469	159.745	2.03615	155.002	1.97596	159.741	4.44714	159.75	4.14843	159.741	4.32033	157.147	4.38861	159.741	4.64361	159.745	4.2381
												151.481	0.6443	151.006	0.58991	143.191	0.55856	160	0.5728	150.656	0.60763	160.004	0.64466	154.145	2.03915	152.792	2.21739	159.998	2.03959	154.261	1.92056	159.999	2.04243	155.253	1.98188	159.998	4.45678	160.009	4.15724	159.998	4.33032	157.395	4.3981	159.998	4.65432	159.999	4.24691
												151.725	0.64546	151.251	0.59073	143.422	0.55901	160.257	0.57369	150.901	0.60862	160.265	0.64556	154.389	2.04488	153.04	2.22358	160.257	2.04506	154.504	1.92627	160.257	2.04847	155.496	1.9875	160.257	4.46559	160.264	4.16621	160.257	4.3399	157.651	4.40748	160.258	4.66445	160.256	4.25607
												151.964	0.64569	151.489	0.5913	143.653	0.56009	160.512	0.57391	151.137	0.60891	160.516	0.64615	154.641	2.05094	153.28	2.22959	160.508	2.05024	154.755	1.93197	160.516	2.05462	155.749	1.99338	160.508	4.47481	160.521	4.17562	160.508	4.34977	157.901	4.41703	160.509	4.67486	160.516	4.26468
												152.21	0.64653	151.733	0.59203	143.879	0.56058	160.771	0.57514	151.381	0.60973	160.776	0.64669	154.882	2.0569	153.528	2.23568	160.77	2.0556	154.999	1.93799	160.767	2.06052	155.996	1.99924	160.769	4.48367	160.78	4.18436	160.769	4.35932	158.154	4.42676	160.77	4.68456	160.767	4.27333
												152.45	0.64743	151.974	0.59275	144.111	0.56145	161.024	0.57539	151.622	0.61075	161.033	0.64776	155.134	2.06265	153.772	2.24184	161.022	2.06081	155.248	1.94369	161.028	2.06642	156.244	2.00499	161.022	4.49252	161.032	4.19322	161.022	4.36883	158.408	4.43584	161.022	4.69452	161.027	4.28163
												152.695	0.64815	152.216	0.59307	144.339	0.56223	161.282	0.57642	151.863	0.61106	161.287	0.64828	155.379	2.06876	154.016	2.2479	161.28	2.06601	155.497	1.9495	161.281	2.07241	156.497	2.01073	161.28	4.50165	161.292	4.20164	161.28	4.37872	158.656	4.44538	161.28	4.70493	161.281	4.29006
												152.938	0.64904	152.461	0.59382	144.569	0.5625	161.539	0.57698	152.108	0.61199	161.546	0.64921	155.625	2.0744	154.264	2.25418	161.538	2.07158	155.741	1.9552	161.538	2.07835	156.74	2.01652	161.538	4.51084	161.545	4.20999	161.538	4.38835	158.912	4.45492	161.538	4.71512	161.539	4.29905
												153.178	0.64949	152.698	0.59454	144.801	0.56337	161.793	0.57765	152.344	0.61246	161.799	0.64996	155.876	2.08057	154.504	2.26041	161.791	2.07703	155.991	1.96112	161.797	2.08448	156.994	2.02236	161.79	4.52049	161.803	4.21889	161.79	4.39845	159.162	4.46499	161.791	4.72584	161.797	4.3077
												153.425	0.65052	152.945	0.59523	145.026	0.56412	162.052	0.57834	152.59	0.61301	162.058	0.65031	156.117	2.08658	154.753	2.2664	162.052	2.08228	156.236	1.96694	162.049	2.09061	157.24	2.02825	162.052	4.52958	162.062	4.22774	162.052	4.4081	159.416	4.47507	162.052	4.73603	162.049	4.31678
												153.663	0.65149	153.185	0.59605	145.26	0.56476	162.306	0.57894	152.83	0.61386	162.314	0.6514	156.369	2.09268	154.996	2.27241	162.304	2.08766	156.484	1.97286	162.311	2.0967	157.489	2.034	162.304	4.53861	162.313	4.2371	162.304	4.41797	159.67	4.48464	162.304	4.74657	162.31	4.32547
												153.909	0.65184	153.426	0.59652	145.486	0.56535	162.564	0.57964	153.07	0.61453	162.568	0.65179	156.614	2.09897	155.24	2.27844	162.563	2.09287	156.732	1.97892	162.562	2.10296	157.74	2.04	162.563	4.54797	162.575	4.24595	162.563	4.42814	159.917	4.49438	162.563	4.75738	162.562	4.33412
												154.152	0.65269	153.671	0.59731	145.717	0.56586	162.822	0.58063	153.315	0.61536	162.828	0.65279	156.861	2.10485	155.489	2.28469	162.821	2.09838	156.976	1.9846	162.821	2.1092	157.984	2.04594	162.821	4.5572	162.827	4.25471	162.821	4.43816	160.174	4.5036	162.821	4.76775	162.821	4.34326
												154.393	0.65291	153.908	0.59801	145.948	0.56705	163.075	0.58106	153.552	0.61595	163.081	0.65324	157.111	2.11105	155.728	2.29095	163.073	2.10364	157.227	1.99069	163.079	2.11532	158.239	2.05163	163.073	4.56715	163.086	4.26385	163.073	4.44869	160.423	4.51309	163.074	4.77888	163.079	4.35217
												154.638	0.65367	154.155	0.59846	146.173	0.5674	163.335	0.58187	153.798	0.61623	163.339	0.65376	157.353	2.11714	155.977	2.29709	163.333	2.10902	157.471	1.99666	163.332	2.12145	158.484	2.05779	163.333	4.57646	163.344	4.27297	163.333	4.45858	160.677	4.52308	163.333	4.78935	163.331	4.36164
												154.878	0.65451	154.394	0.5993	146.406	0.56816	163.587	0.58237	154.037	0.61728	163.597	0.6546	157.603	2.12317	156.22	2.30328	163.587	2.11436	157.72	2.00253	163.591	2.12766	158.733	2.06359	163.587	4.58555	163.596	4.28252	163.587	4.46824	160.931	4.53267	163.587	4.7998	163.591	4.37056
												155.122	0.65477	154.636	0.5998	146.633	0.569	163.847	0.58332	154.278	0.61773	163.85	0.65508	157.849	2.12914	156.465	2.30908	163.844	2.11966	157.969	2.00842	163.845	2.13395	158.984	2.06939	163.844	4.59475	163.856	4.29148	163.844	4.47809	161.179	4.54272	163.844	4.8102	163.845	4.37934
												155.366	0.65592	154.881	0.60066	146.864	0.56963	164.104	0.58403	154.522	0.61867	164.11	0.65607	158.095	2.13509	156.712	2.31516	164.103	2.12518	158.212	2.01424	164.103	2.13979	159.228	2.07513	164.103	4.60353	164.11	4.30036	164.103	4.48768	161.435	4.55213	164.103	4.82009	164.102	4.38816
												155.606	0.65609	155.118	0.60116	147.096	0.57041	164.358	0.58449	154.759	0.61924	164.363	0.65674	158.347	2.14108	156.953	2.32129	164.354	2.13061	158.463	2.02017	164.362	2.14608	159.48	2.08066	164.355	4.61291	164.367	4.30939	164.354	4.49744	161.685	4.562	164.355	4.83093	164.362	4.39659
												155.852	0.65706	155.364	0.60206	147.321	0.57111	164.617	0.58531	155.003	0.61974	164.622	0.65731	158.587	2.14724	157.201	2.32726	164.615	2.13612	158.707	2.02622	164.613	2.15232	159.728	2.08627	164.615	4.62221	164.626	4.31783	164.615	4.50747	161.937	4.57216	164.615	4.84121	164.613	4.40558
												156.091	0.65772	155.605	0.60281	147.553	0.5717	164.869	0.58629	155.244	0.62057	164.879	0.65802	158.839	2.1532	157.445	2.33347	164.868	2.14164	158.956	2.03205	164.874	2.15845	159.977	2.09221	164.869	4.63186	164.877	4.32706	164.868	4.51751	162.191	4.5818	164.869	4.85147	164.874	4.41465
												156.336	0.65835	155.846	0.60326	147.781	0.57251	165.128	0.58655	155.484	0.62076	165.133	0.65837	159.085	2.15927	157.689	2.33964	165.126	2.14724	159.205	2.03796	165.127	2.16489	160.229	2.09804	165.126	4.64137	165.138	4.3361	165.126	4.52771	162.44	4.59223	165.126	4.86212	165.127	4.42383
												156.58	0.6591	156.091	0.60417	148.01	0.57318	165.385	0.58776	155.73	0.62209	165.393	0.65944	159.33	2.165	157.937	2.34591	165.385	2.15295	159.448	2.04364	165.385	2.17109	160.472	2.10345	165.385	4.65007	165.392	4.34527	165.385	4.53728	162.696	4.60223	165.385	4.87228	165.385	4.43273
												156.819	0.65949	156.328	0.60478	148.243	0.57396	165.639	0.58801	155.966	0.62203	165.645	0.66021	159.581	2.17095	158.177	2.35185	165.636	2.15856	159.699	2.04954	165.643	2.17742	160.726	2.10906	165.636	4.6596	165.65	4.35433	165.636	4.54756	162.946	4.61186	165.636	4.88326	165.643	4.4415
												157.066	0.66049	156.574	0.60531	148.468	0.57473	165.898	0.58884	156.212	0.62285	165.904	0.66053	159.822	2.17715	158.426	2.35795	165.898	2.16405	159.944	2.05534	165.895	2.1835	160.972	2.11449	165.898	4.66882	165.908	4.36321	165.898	4.55761	163.199	4.62126	165.899	4.89389	165.895	4.45095
												157.304	0.66149	156.814	0.60611	148.702	0.57532	166.152	0.58963	156.451	0.62392	166.161	0.66139	160.075	2.18317	158.669	2.36416	166.15	2.16987	160.192	2.06121	166.157	2.18984	161.221	2.12	166.15	4.67838	166.16	4.37244	166.15	4.56771	163.454	4.63043	166.151	4.90446	166.156	4.46003
												157.55	0.66183	157.057	0.60669	148.929	0.57625	166.411	0.58977	156.693	0.62466	166.415	0.66192	160.319	2.18926	158.914	2.37022	166.409	2.17546	160.44	2.06726	166.409	2.19625	161.473	2.1257	166.409	4.68818	166.421	4.38115	166.409	4.57838	163.701	4.64016	166.409	4.9156	166.409	4.46944
												157.793	0.66297	157.302	0.60748	149.159	0.57655	166.667	0.59111	156.937	0.62543	166.674	0.66267	160.566	2.19517	159.162	2.37641	166.667	2.18117	160.685	2.07297	166.667	2.20249	161.715	2.13125	166.667	4.69717	166.673	4.39018	166.667	4.58812	163.957	4.64973	166.667	4.92591	166.667	4.47902
												158.034	0.66364	157.538	0.60803	149.39	0.57776	166.921	0.59135	157.174	0.62579	166.927	0.66367	160.816	2.20143	159.402	2.38238	166.918	2.18675	160.935	2.07879	166.925	2.20893	161.97	2.13661	166.919	4.70636	166.932	4.39975	166.919	4.59786	164.207	4.6593	166.919	4.93643	166.925	4.48795
												158.279	0.66441	157.785	0.6086	149.615	0.57849	167.181	0.59256	157.419	0.62641	167.186	0.66412	161.058	2.20763	159.65	2.38815	167.178	2.19239	161.18	2.0846	167.177	2.21508	162.216	2.14208	167.178	4.71505	167.19	4.40871	167.178	4.60733	164.46	4.66888	167.178	4.94644	167.177	4.49708
												158.52	0.66494	158.024	0.60947	149.849	0.57893	167.433	0.59303	157.658	0.62739	167.443	0.66499	161.308	2.21376	159.893	2.39417	167.433	2.19801	161.428	2.09036	167.437	2.22122	162.465	2.14735	167.433	4.72402	167.442	4.41782	167.433	4.61712	164.714	4.67788	167.433	4.95664	167.437	4.50559
												158.763	0.66541	158.266	0.60982	150.075	0.57999	167.693	0.59342	157.899	0.62783	167.696	0.66542	161.556	2.2198	160.138	2.40025	167.69	2.20364	161.678	2.09643	167.691	2.2275	162.716	2.15262	167.69	4.7334	167.702	4.42647	167.69	4.62748	164.962	4.68737	167.691	4.96711	167.691	4.51439
												159.008	0.66619	158.51	0.61093	150.306	0.58025	167.949	0.59443	158.143	0.62877	167.957	0.66635	161.8	2.22556	160.385	2.40644	167.949	2.20961	161.92	2.10224	167.949	2.23379	162.96	2.15784	167.949	4.74231	167.956	4.4353	167.95	4.6373	165.218	4.69658	167.949	4.97728	167.949	4.5238
												159.247	0.66666	158.749	0.61144	150.537	0.58119	168.204	0.5944	158.38	0.62907	168.208	0.66712	162.052	2.23175	160.626	2.41235	168.201	2.2152	162.171	2.10793	168.208	2.24014	163.213	2.16325	168.201	4.75142	168.213	4.44448	168.201	4.64706	165.469	4.70643	168.201	4.98771	168.208	4.5327
												159.494	0.66771	158.993	0.61225	150.763	0.58163	168.463	0.59599	158.625	0.62986	168.468	0.66748	162.292	2.23754	160.874	2.41834	168.462	2.2208	162.415	2.11348	168.459	2.24653	163.46	2.16831	168.462	4.75974	168.472	4.45324	168.462	4.65646	165.721	4.71644	168.462	4.99766	168.459	4.54176
												159.733	0.66859	159.235	0.61313	150.995	0.5824	168.716	0.59581	158.866	0.63065	168.725	0.66855	162.544	2.24336	161.118	2.42436	168.715	2.22638	162.665	2.11907	168.72	2.25275	163.709	2.17315	168.715	4.76849	168.724	4.46208	168.714	4.66617	165.975	4.72529	168.714	5.00775	168.72	4.55019
												159.978	0.66892	159.476	0.61374	151.223	0.58331	168.974	0.59703	159.106	0.63138	168.979	0.66896	162.79	2.24951	161.362	2.43014	168.972	2.23162	162.913	2.12507	168.974	2.25897	163.961	2.17825	168.972	4.77765	168.985	4.4703	168.972	4.67593	166.224	4.73463	168.972	5.01791	168.973	4.55883
												160.221	0.66992	159.721	0.61458	151.453	0.58374	169.232	0.59733	159.351	0.63212	169.238	0.66976	163.036	2.25527	161.61	2.43623	169.231	2.23736	163.157	2.13094	169.231	2.26481	164.204	2.18321	169.231	4.78619	169.238	4.47858	169.231	4.68558	166.48	4.74401	169.231	5.02807	169.231	4.56766
												160.46	0.6704	159.958	0.61511	151.686	0.58477	169.486	0.59841	159.588	0.63272	169.491	0.67056	163.287	2.26127	161.85	2.44238	169.482	2.24313	163.408	2.13685	169.49	2.2712	164.458	2.1884	169.482	4.79515	169.495	4.48723	169.482	4.69577	166.729	4.75352	169.482	5.03917	169.49	4.57656
												160.707	0.67114	160.205	0.61581	151.91	0.58519	169.745	0.59885	159.833	0.63339	169.75	0.67108	163.528	2.26692	162.099	2.44838	169.744	2.24869	163.652	2.14265	169.741	2.27744	164.703	2.19356	169.744	4.80358	169.754	4.4957	169.744	4.70552	166.983	4.76328	169.744	5.04947	169.741	4.58606
												160.946	0.67183	160.445	0.61653	152.144	0.58591	169.998	0.59961	160.073	0.63417	170.007	0.67212	163.78	2.27273	162.342	2.45452	169.996	2.2544	163.9	2.14844	170.003	2.28368	164.953	2.19852	169.997	4.81191	170.006	4.50466	169.996	4.71524	167.237	4.77258	169.996	5.05961	170.003	4.59481
												161.191	0.67265	160.686	0.61706	152.37	0.58678	170.256	0.60014	160.314	0.63492	170.262	0.67245	164.025	2.27877	162.587	2.46065	170.255	2.26008	164.149	2.15434	170.255	2.28991	165.204	2.20344	170.255	4.82021	170.267	4.51299	170.255	4.72515	167.484	4.78209	170.255	5.06991	170.255	4.60351
												161.435	0.67364	160.931	0.61795	152.601	0.5874	170.514	0.60059	160.558	0.63534	170.52	0.67315	164.272	2.28477	162.835	2.46664	170.513	2.26577	164.393	2.16014	170.514	2.29602	165.448	2.2081	170.513	4.82803	170.52	4.52126	170.513	4.73478	167.741	4.79078	170.513	5.08015	170.514	4.61266
												161.675	0.67402	161.168	0.61868	152.832	0.58815	170.767	0.60145	160.795	0.63611	170.773	0.67382	164.522	2.29092	163.075	2.47276	170.765	2.27142	164.643	2.16614	170.772	2.30244	165.702	2.2127	170.765	4.83633	170.778	4.5298	170.765	4.74495	167.99	4.79938	170.766	5.09078	170.771	4.62144
												161.921	0.67497	161.414	0.61914	153.058	0.5889	171.028	0.60191	161.04	0.63671	171.031	0.67431	164.763	2.29663	163.323	2.47873	171.025	2.27733	164.887	2.17221	171.024	2.30885	165.947	2.21764	171.025	4.84395	171.036	4.53766	171.025	4.75463	168.244	4.80874	171.025	5.10082	171.024	4.63067
												162.161	0.67557	161.654	0.61993	153.291	0.58939	171.279	0.60325	161.28	0.63762	171.289	0.67526	165.014	2.30248	163.566	2.48493	171.279	2.28293	165.136	2.17782	171.284	2.31521	166.197	2.22238	171.279	4.85097	171.288	4.54569	171.279	4.76404	168.498	4.81826	171.279	5.11066	171.283	4.63932
												162.405	0.67619	161.897	0.62035	153.518	0.5904	171.539	0.60332	161.521	0.63793	171.543	0.67573	165.26	2.30829	163.811	2.49107	171.536	2.28832	165.385	2.18377	171.537	2.32144	166.448	2.22727	171.536	4.85746	171.548	4.5533	171.536	4.77343	168.746	4.82836	171.537	5.12045	171.537	4.64814
												162.649	0.67697	162.141	0.62135	153.748	0.59093	171.795	0.60452	161.765	0.63885	171.803	0.67655	165.506	2.31429	164.058	2.49737	171.795	2.29393	165.628	2.18968	171.795	2.32744	166.692	2.23192	171.795	4.86332	171.802	4.56059	171.795	4.78234	169.002	4.83751	171.796	5.12985	171.795	4.657
												162.889	0.67754	162.379	0.62193	153.98	0.59172	172.05	0.60537	162.002	0.63933	172.054	0.67726	165.757	2.32034	164.299	2.5033	172.047	2.2996	165.879	2.19546	172.054	2.33344	166.945	2.23627	172.047	4.86961	172.06	4.5677	172.047	4.79188	169.252	4.84649	172.047	5.13968	172.054	4.6652
												163.135	0.67816	162.623	0.62257	154.205	0.59219	172.309	0.60583	162.246	0.64004	172.314	0.67758	165.998	2.32614	164.547	2.50904	172.308	2.30519	166.123	2.20145	172.306	2.33959	167.192	2.24084	172.307	4.87491	172.318	4.57426	172.308	4.80128	169.505	4.85571	172.308	5.14968	172.305	4.67384
												163.374	0.67926	162.865	0.62332	154.438	0.59286	172.563	0.60689	162.487	0.64083	172.57	0.67858	166.25	2.33186	164.791	2.51509	172.561	2.31097	166.373	2.20733	172.566	2.34591	167.44	2.24526	172.561	4.87994	172.57	4.58124	172.561	4.8111	169.759	4.86463	172.561	5.16028	172.566	4.68248
												163.619	0.67994	163.106	0.62378	154.665	0.59381	172.821	0.60719	162.727	0.64148	172.825	0.67892	166.496	2.33778	165.035	2.52101	172.819	2.31688	166.621	2.21353	172.819	2.35235	167.693	2.24964	172.819	4.88448	172.831	4.588	172.819	4.82108	170.007	4.87448	172.819	5.1708	172.82	4.69167
												163.863	0.68067	163.351	0.62475	154.895	0.59415	173.077	0.60834	162.973	0.6422	173.085	0.6798	166.741	2.34371	165.283	2.5271	173.077	2.32249	166.864	2.21921	173.077	2.35847	167.936	2.25388	173.077	4.88797	173.084	4.59452	173.077	4.83019	170.264	4.88419	173.077	5.18035	173.077	4.70075
												164.102	0.68132	163.588	0.62541	155.127	0.59524	173.332	0.6085	163.209	0.64284	173.338	0.68044	166.992	2.34994	165.523	2.53344	173.329	2.32808	167.115	2.22503	173.336	2.36471	168.19	2.25794	173.329	4.89123	173.342	4.60013	173.329	4.83981	170.513	4.89364	173.329	5.19002	173.335	4.70932
												164.349	0.68233	163.835	0.62603	155.352	0.59568	173.592	0.60966	163.455	0.64361	173.596	0.68097	167.233	2.35592	165.772	2.53922	173.59	2.33375	167.36	2.2311	173.588	2.37082	168.435	2.26174	173.59	4.89378	173.6	4.60373	173.59	4.84903	170.766	4.90278	173.591	5.19972	173.587	4.71836
												164.587	0.68271	164.074	0.62674	155.586	0.59638	173.844	0.61011	163.694	0.64442	173.853	0.68177	167.485	2.36173	166.015	2.54543	173.842	2.3396	167.608	2.23718	173.849	2.37713	168.685	2.26541	173.842	4.89608	173.852	4.60584	173.842	4.85866	171.02	4.91178	173.843	5.20996	173.849	4.72681
												164.833	0.6837	164.317	0.62708	155.813	0.59733	174.103	0.61036	163.935	0.645	174.107	0.68219	167.73	2.36804	166.26	2.55149	174.101	2.34525	167.857	2.24351	174.101	2.38339	168.936	2.26858	174.101	4.89788	174.114	4.60701	174.101	4.86875	171.268	4.92123	174.101	5.22057	174.101	4.73568
												165.076	0.68422	164.562	0.62797	156.043	0.59789	174.36	0.61165	164.18	0.64585	174.366	0.68325	167.977	2.37391	166.508	2.5576	174.359	2.35124	168.1	2.24983	174.36	2.38963	169.179	2.27051	174.36	4.89704	174.365	4.60893	174.359	4.87836	171.524	4.93046	174.359	5.2306	174.36	4.74481
												165.317	0.68485	164.798	0.62852	156.275	0.59885	174.613	0.61225	164.417	0.64636	174.619	0.6839	168.226	2.38015	166.748	2.56369	174.611	2.35706	168.351	2.256	174.618	2.39614	169.434	2.27104	174.611	4.89372	174.624	4.61018	174.611	4.888	171.774	4.93972	174.611	5.24087	174.618	4.75373
												165.562	0.68557	165.045	0.62941	156.499	0.59942	174.874	0.61323	164.662	0.64709	174.878	0.68455	168.469	2.38625	166.997	2.56954	174.871	2.3628	168.596	2.26211	174.87	2.40231	169.679	2.27088	174.871	4.88601	174.882	4.60931	174.871	4.89708	172.027	4.94908	174.871	5.25013	174.869	4.76281
												165.802	0.6865	165.284	0.63043	156.734	0.6002	175.125	0.61408	164.901	0.64788	175.135	0.68549	168.719	2.39234	167.239	2.57556	175.125	2.36859	168.845	2.26815	175.13	2.40848	169.929	2.26317	175.125	4.87331	175.134	4.60756	175.125	4.90653	172.281	4.95809	175.125	5.25961	175.13	4.77136
												166.046	0.68724	165.526	0.63067	156.96	0.601	175.385	0.61422	165.142	0.6483	175.388	0.6858	168.966	2.39858	167.484	2.58121	175.382	2.37434	169.093	2.27456	175.384	2.41475	170.18	2.24131	175.383	4.85525	175.394	4.60362	175.382	4.91627	172.529	4.96755	175.383	5.26985	175.383	4.78002
												166.291	0.68798	165.771	0.63149	157.19	0.60151	175.642	0.61533	165.387	0.64907	175.649	0.68654	169.211	2.40472	167.731	2.58728	175.642	2.3802	169.336	2.28097	175.641	2.42081	170.424	2.21127	175.642	4.82113	175.648	4.59807	175.642	4.92566	172.785	4.97655	175.642	5.27978	175.641	4.78897
												166.53	0.68883	166.008	0.63223	157.422	0.60261	175.897	0.61582	165.624	0.64971	175.9	0.68739	169.463	2.41065	167.972	2.59317	175.893	2.38589	169.588	2.28722	175.9	2.42727	170.677	2.15051	175.893	4.48037	175.905	4.5889	175.893	4.93579	173.035	4.98559	175.893	5.29008	175.9	4.79756
												166.776	0.68954	166.254	0.63315	157.647	0.6031	176.155	0.61671	165.868	0.6503	176.16	0.68803	169.704	2.4166	168.22	2.5994	176.154	2.39134	169.831	2.29346	176.152	2.43349	170.924	1.41967	176.154	1.60867	176.165	4.57327	176.154	4.94526	173.288	4.99569	176.154	5.29964	176.152	4.80682
												167.016	0.69027	166.495	0.63385	157.879	0.60395	176.408	0.61729	166.11	0.65124	176.417	0.68894	169.955	2.42244	168.464	2.60546	176.407	2.39712	170.08	2.29968	176.413	2.43981	171.173	0.10818	176.362	0.05961	176.416	4.54415	176.407	4.95475	173.543	5.00518	176.407	5.30938	176.413	4.81558
												167.26	0.69083	166.736	0.63424	158.108	0.60473	176.667	0.61808	166.349	0.65173	176.672	0.68941	170.201	2.42844	168.708	2.61124	176.665	2.40293	170.329	2.30606	176.666	2.44629	171.226	-0.02563	176.364	0.03513	176.677	4.29469	176.665	4.96416	173.791	5.01478	176.665	5.31905	176.665	4.82436
												167.504	0.69176	166.981	0.6351	158.338	0.6052	176.924	0.61901	166.594	0.65249	176.931	0.69022	170.447	2.43464	168.956	2.61708	176.923	2.4088	170.572	2.31237	176.924	2.45255	171.226	0.02335			176.93	1.72369	176.923	4.97328	174.047	5.02376	176.923	5.3286	176.923	4.83277
												167.744	0.69235	167.219	0.63563	158.57	0.60624	177.178	0.61949	166.831	0.65309	177.184	0.69097	170.697	2.44083	169.195	2.62284	177.174	2.41469	170.823	2.31879	177.182	2.45899					177.16	0.07089	177.174	4.98351	174.296	5.03279	177.175	5.33944	177.182	4.841
												167.991	0.69297	167.464	0.63641	158.794	0.60687	177.437	0.62032	167.076	0.65372	177.442	0.69142	170.939	2.44689	169.445	2.62871	177.437	2.42055	171.068	2.32541	177.433	2.46532					177.163	0.03608	177.436	4.99321	174.55	5.04245	177.437	5.34979	177.433	4.8505
												168.229	0.69402	167.705	0.63717	159.028	0.6076	177.69	0.62096	167.316	0.65472	177.699	0.69241	171.19	2.45276	169.688	2.63474	177.689	2.42657	171.316	2.33145	177.695	2.47163							177.688	5.00293	174.804	5.05159	177.689	5.36002	177.695	4.85954
												168.474	0.69411	167.946	0.63772	159.254	0.60831	177.949	0.62162	167.557	0.65518	177.953	0.69309	171.435	2.45872	169.932	2.64083	177.947	2.43255	171.566	2.33784	177.947	2.47823							177.947	5.01275	175.051	5.06111	177.948	5.3701	177.947	4.86854
												168.718	0.69529	168.192	0.63872	159.485	0.60879	178.206	0.62232	167.802	0.6561	178.213	0.69403	171.682	2.46454	170.181	2.64649	178.205	2.43863	171.809	2.344	178.206	2.48431							178.205	5.02205	175.308	5.07036	178.205	5.37983	178.206	4.87758
												168.958	0.69571	168.428	0.63936	159.717	0.60982	178.459	0.62312	168.038	0.65666	178.466	0.69464	171.932	2.47074	170.42	2.65226	178.457	2.44469	172.059	2.35029	178.464	2.49076							178.457	5.0321	175.557	5.07921	178.458	5.39019	178.464	4.88614
												169.204	0.69645	168.674	0.63987	159.941	0.61031	178.72	0.62407	168.283	0.65715	178.724	0.6952	172.174	2.47676	170.669	2.65804	178.717	2.45065	172.303	2.35667	178.716	2.49726							178.717	5.04161	175.811	5.08805	178.718	5.40015	178.716	4.89498
												169.443	0.69756	168.914	0.64072	160.176	0.61084	178.972	0.62474	168.523	0.65814	178.982	0.69607	172.425	2.48268	170.912	2.66378	178.971	2.45662	172.552	2.36332	178.976	2.50371							178.971	5.05149	176.065	5.09715	178.972	5.41027	178.976	4.90328
												169.688	0.69825	169.156	0.64117	160.402	0.61193	179.231	0.62543	168.764	0.65856	179.235	0.69668	172.671	2.48847	171.157	2.6694	179.229	2.46262	172.802	2.36956	179.23	2.51044							179.229	5.06143	176.313	5.10712	179.229	5.42049	179.23	4.91226
												169.932	0.69903	169.401	0.64223	160.632	0.6124	179.487	0.62611	169.008	0.65972	179.496	0.69748	172.916	2.49447	171.405	2.67511	179.488	2.46859	173.045	2.37576	179.488	2.51707							179.487	5.07062	176.569	5.11661	179.488	5.42983	179.487	4.92155
												170.171	0.69918	169.639	0.64259	160.864	0.61338	179.742	0.6268	169.246	0.66009	179.747	0.69835	173.168	2.50035	171.645	2.68088	179.739	2.47449	173.296	2.38183	179.746	2.52323							179.739	5.08023	176.819	5.12571	179.739	5.43979	179.746	4.92988
												170.417	0.70026	169.883	0.64338	161.089	0.61376	180.001	0.62728	169.49	0.6608	180.007	0.69882	173.409	2.50579	171.893	2.68652	180	2.47997	173.54	2.3881	179.998	2.52944							180	5.08959	177.072	5.13493	180.001	5.44939	179.998	4.93857
												170.657	0.70118	170.125	0.64416	161.322	0.61468	180.254	0.62857	169.731	0.66162	180.263	0.69972	173.66	2.51144	172.136	2.69245	180.253	2.48603	173.788	2.3943	180.259	2.536							180.253	5.09941	177.327	5.14348	180.253	5.45959	180.258	4.9471
												170.902	0.70162	170.366	0.64474	161.55	0.61558	180.513	0.62866	169.971	0.66199	180.518	0.70016	173.906	2.51742	172.381	2.69819	180.511	2.49266	174.037	2.40067	180.512	2.54263							180.511	5.10943	177.574	5.15296	180.512	5.47004	180.511	4.95615
												171.146	0.70247	170.611	0.6456	161.779	0.61614	180.77	0.62995	170.215	0.66313	180.776	0.70101	174.152	2.52315	172.629	2.7041	180.77	2.4989	174.281	2.4068	180.77	2.54915							180.769	5.11888	177.831	5.16261	180.769	5.47976	180.77	4.96548
												171.385	0.70291	170.849	0.64624	162.012	0.61705	181.024	0.63034	170.453	0.66349	181.03	0.70177	174.402	2.52911	172.869	2.71003	181.021	2.50501	174.531	2.41305	181.028	2.5558							181.021	5.1289	178.079	5.17262	181.022	5.49054	181.028	4.97444
												171.632	0.70383	171.095	0.64677	162.236	0.61776	181.283	0.63112	170.698	0.66423	181.288	0.70223	174.645	2.53495	173.118	2.716	181.282	2.51098	174.776	2.41928	181.279	2.56234							181.282	5.13802	178.333	5.18194	181.282	5.50017	181.28	4.98354
												171.87	0.70461	171.335	0.64754	162.47	0.61851	181.536	0.63186	170.937	0.66498	181.546	0.70319	174.895	2.5406	173.361	2.72219	181.534	2.51716	175.024	2.42553	181.541	2.56874							181.534	5.14717	178.588	5.19048	181.535	5.50977	181.541	4.9918
												172.116	0.70516	171.576	0.64822	162.697	0.61936	181.795	0.63266	171.179	0.66555	181.799	0.70377	175.14	2.54654	173.605	2.7279	181.793	2.52327	175.274	2.43192	181.793	2.57514							181.793	5.15722	178.835	5.19968	181.794	5.51992	181.793	5.0002
												172.359	0.70625	171.821	0.64919	162.927	0.61992	182.053	0.6334	171.423	0.66649	182.058	0.70459	175.387	2.55254	173.853	2.73361	182.051	2.52962	175.517	2.43824	182.052	2.58147							182.051	5.16722	179.092	5.20876	182.051	5.53021	182.052	5.0091
												172.599	0.70683	172.058	0.6498	163.159	0.62077	182.305	0.63379	171.66	0.66722	182.312	0.70521	175.638	2.55846	174.093	2.73986	182.304	2.53577	175.768	2.44446	182.31	2.5885							182.304	5.17706	179.341	5.21782	182.304	5.54056	182.31	5.018
												172.844	0.70776	172.304	0.65038	163.384	0.62163	182.567	0.63461	171.905	0.66781	182.57	0.70575	175.88	2.56414	174.343	2.74577	182.563	2.54177	176.012	2.45074	182.562	2.59521							182.563	5.18611	179.594	5.22738	182.564	5.54988	182.562	5.02732
												173.085	0.70823	172.544	0.65133	163.618	0.62202	182.818	0.63543	172.145	0.6688	182.827	0.70659	176.129	2.56977	174.585	2.75151	182.817	2.54785	176.261	2.45702	182.822	2.60171							182.817	5.19531	179.849	5.23623	182.818	5.55925	182.822	5.03567
												173.329	0.70907	172.786	0.65179	163.844	0.62322	183.077	0.63588	172.386	0.66929	183.081	0.70722	176.376	2.57573	174.83	2.75735	183.075	2.55381	176.509	2.46345	183.076	2.60818							183.075	5.20469	180.097	5.24565	183.075	5.56922	183.076	5.04399
												173.573	0.70989	173.031	0.65258	164.075	0.62363	183.334	0.63701	172.63	0.67013	183.342	0.70814	176.622	2.58165	175.077	2.7631	183.334	2.55961	176.753	2.46994	183.333	2.6146							183.334	5.21357	180.352	5.25437	183.334	5.57836	183.333	5.05279
												173.813	0.7104	173.268	0.6532	164.306	0.62461	183.589	0.63734	172.867	0.67075	183.593	0.70878	176.873	2.58731	175.317	2.76886	183.585	2.5657	177.004	2.47602	183.593	2.62113							183.585	5.22329	180.602	5.26332	183.586	5.58832	183.593	5.06088
												174.058	0.71126	173.514	0.65383	164.531	0.62527	183.848	0.63823	173.111	0.6716	183.853	0.70919	177.115	2.59291	175.566	2.77474	183.846	2.57176	177.247	2.48219	183.844	2.62748							183.846	5.23245	180.855	5.27255	183.846	5.59787	183.844	5.06984
												174.299	0.71181	173.755	0.65485	164.764	0.62589	184.1	0.63892	173.353	0.67194	184.109	0.71026	177.366	2.59857	175.809	2.7809	184.099	2.5779	177.497	2.48834	184.104	2.63393							184.1	5.24179	181.11	5.28123	184.1	5.60751	184.104	5.07839
												174.543	0.71229	173.996	0.65518	164.992	0.627	184.359	0.63959	173.593	0.67299	184.364	0.71095	177.611	2.60426	176.054	2.78674	184.357	2.58391	177.745	2.49457	184.358	2.64065							184.357	5.25133	181.358	5.29083	184.358	5.61739	184.358	5.0869
												174.787	0.71344	174.241	0.65614	165.221	0.62738	184.616	0.64074	173.837	0.67369	184.623	0.71147	177.858	2.60965	176.302	2.79255	184.615	2.58985	177.989	2.50041	184.616	2.64729							184.615	5.26034	181.614	5.30027	184.616	5.62658	184.616	5.09568
												175.026	0.71419	174.478	0.65673	165.454	0.62838	184.87	0.64108	174.074	0.67491	184.876	0.71213	178.108	2.61534	176.542	2.79855	184.867	2.59568	178.239	2.50651	184.874	2.65374							184.867	5.26988	181.864	5.3093	184.867	5.63622	184.874	5.10391
												175.273	0.71481	174.725	0.65755	165.679	0.6287	185.129	0.64214	174.32	0.67527	185.134	0.71285	178.35	2.62129	176.791	2.8045	185.128	2.60167	178.484	2.51303	185.126	2.66033							185.128	5.2789	182.116	5.31827	185.128	5.64563	185.125	5.11289
												175.512	0.71574	174.965	0.65835	165.912	0.62967	185.383	0.64265	174.559	0.67609	185.391	0.71379	178.601	2.627	177.034	2.8106	185.381	2.60756	178.733	2.51933	185.387	2.66697							185.381	5.28867	182.372	5.32687	185.381	5.65558	185.387	5.12122
												175.757	0.71643	175.206	0.65894	166.138	0.63036	185.641	0.64339	174.801	0.67669	185.646	0.71436	178.846	2.63269	177.279	2.81675	185.64	2.61391	178.982	2.52552	185.639	2.67351							185.639	5.29885	182.619	5.33615	185.64	5.66576	185.639	5.13001
												176.001	0.71742	175.452	0.65977	166.369	0.63107	185.899	0.64426	175.045	0.67722	185.905	0.71533	179.092	2.63831	177.526	2.82302	185.897	2.62043	179.225	2.53179	185.898	2.6801							185.897	5.30808	182.876	5.34511	185.898	5.67523	185.898	5.13905
												176.241	0.7181	175.689	0.66046	166.601	0.63213	186.152	0.64473	175.282	0.67813	186.158	0.71572	179.343	2.64399	177.766	2.82908	186.15	2.62671	179.476	2.53796	186.156	2.68693							186.15	5.31757	183.124	5.35385	186.15	5.68485	186.156	5.14764
												176.486	0.71879	175.935	0.66105	166.825	0.63266	186.412	0.64559	175.527	0.67867	186.416	0.71627	179.585	2.6496	178.016	2.83521	186.41	2.63282	179.72	2.54421	186.409	2.69348							186.41	5.32661	183.378	5.36269	186.41	5.69389	186.408	5.15649
												176.726	0.71958	176.174	0.66193	167.06	0.63328	186.664	0.64642	175.766	0.67957	186.674	0.71727	179.835	2.65517	178.257	2.84113	186.664	2.63903	179.969	2.55044	186.668	2.69992							186.664	5.33607	183.632	5.37106	186.664	5.70379	186.668	5.16473
												176.97	0.72008	176.416	0.6623	167.286	0.6339	186.924	0.64686	176.007	0.68014	186.927	0.71798	180.082	2.66091	178.503	2.84694	186.921	2.64535	180.218	2.55687	186.922	2.70641							186.921	5.3463	183.88	5.38007	186.921	5.71393	186.922	5.17305
												177.214	0.72121	176.661	0.66337	167.517	0.63479	187.18	0.64781	176.252	0.68118	187.188	0.71889	180.327	2.66654	178.75	2.8533	187.18	2.65161	180.461	2.56293	187.179	2.71288							187.18	5.35541	184.136	5.38889	187.18	5.72315	187.179	5.18191
												177.454	0.72177	176.899	0.66394	167.748	0.63571	187.434	0.64806	176.489	0.68179	187.44	0.71965	180.578	2.67191	178.991	2.85957	187.432	2.65752	180.712	2.56911	187.439	2.71939							187.432	5.36451	184.386	5.398	187.432	5.73252	187.438	5.19008
												177.699	0.72278	177.144	0.66471	167.973	0.63627	187.694	0.64892	176.733	0.68233	187.699	0.72021	180.819	2.67745	179.238	2.86583	187.692	2.66342	180.955	2.57518	187.691	2.7258							187.692	5.37297	184.639	5.40755	187.693	5.74118	187.69	5.19828
												177.94	0.72353	177.385	0.66562	168.206	0.63714	187.947	0.64989	176.974	0.68322	187.956	0.72111	181.071	2.68291	179.483	2.87201	187.945	2.66933	181.205	2.58114	187.951	2.73225							187.945	5.38193	184.894	5.41605	187.945	5.75014	187.951	5.20598
												178.184	0.72401	177.626	0.66614	168.434	0.63781	188.205	0.65026	177.214	0.68376	188.21	0.72153	181.316	2.68842	179.727	2.8781	188.204	2.6752	181.453	2.58751	188.204	2.73863							188.203	5.39096	185.141	5.42513	188.204	5.75951	188.204	5.21425
												178.429	0.72529	177.871	0.66717	168.664	0.6385	188.462	0.65153	177.459	0.68438	188.469	0.72242	181.563	2.69403	179.975	2.88439	188.462	2.68136	181.697	2.59399	188.462	2.74494							188.462	5.40008	185.398	5.43373	188.462	5.76861	188.462	5.22265
												178.668	0.72585	178.109	0.66784	168.896	0.63947	188.716	0.65191	177.696	0.68507	188.722	0.72323	181.813	2.69955	180.215	2.89055	188.714	2.68761	181.947	2.60033	188.721	2.75157							188.713	5.41014	185.647	5.44261	188.714	5.77869	188.72	5.23055
												178.914	0.72671	178.355	0.66849	169.12	0.64013	188.976	0.65305	177.941	0.68565	188.98	0.72398	182.055	2.70518	180.464	2.89696	188.975	2.69368	182.192	2.60637	188.972	2.75804							188.975	5.41924	185.901	5.45181	188.975	5.78818	188.972	5.23937
												179.153	0.72755	178.595	0.66932	169.354	0.64082	189.229	0.65361	178.181	0.6866	189.237	0.72488	182.306	2.71091	180.707	2.90355	189.226	2.69986	182.441	2.61244	189.234	2.76471							189.227	5.42809	186.155	5.46055	189.227	5.79705	189.233	5.24734
												179.399	0.72804	178.836	0.66977	169.581	0.64158	189.487	0.65426	178.422	0.68701	189.492	0.72523	182.552	2.71654	180.952	2.90979	189.485	2.70585	182.689	2.61854	189.485	2.77124							189.485	5.43752	186.403	5.46999	189.485	5.80634	189.485	5.25511
												179.642	0.72911	179.081	0.67089	169.812	0.64208	189.744	0.65515	178.666	0.68803	189.751	0.72604	182.798	2.72214	181.199	2.91588	189.743	2.71218	182.933	2.62492	189.744	2.77758							189.743	5.44652	186.659	5.47856	189.743	5.81532	189.744	5.26315
												179.882	0.72949	179.319	0.67157	170.043	0.64303	189.998	0.65575	178.903	0.68875	190.004	0.72681	183.048	2.72823	181.439	2.92216	189.996	2.71826	183.184	2.63144	190.002	2.78411							189.996	5.45625	186.908	5.48713	189.996	5.82499	190.002	5.27095
												180.127	0.73074	179.565	0.67225	170.268	0.64391	190.258	0.65649	179.148	0.68921	190.263	0.72753	183.29	2.73397	181.688	2.92852	190.256	2.72442	183.428	2.63795	190.254	2.79049							190.255	5.46546	187.162	5.4963	190.256	5.83424	190.254	5.27976
												180.367	0.73128	179.805	0.673	170.501	0.64434	190.51	0.65758	179.388	0.69018	190.52	0.72827	183.541	2.73953	181.931	2.93472	190.51	2.73072	183.677	2.64402	190.514	2.79685							190.51	5.47485	187.415	5.50509	190.51	5.84341	190.514	5.28783
												180.612	0.73184	180.046	0.67343	170.728	0.64555	190.769	0.65811	179.629	0.69066	190.774	0.72891	183.787	2.74507	182.175	2.94112	190.767	2.7369	183.926	2.65024	190.769	2.80333							190.767	5.48434	187.664	5.51471	190.767	5.85258	190.768	5.29597
												180.856	0.73284	180.291	0.67443	170.959	0.64628	191.027	0.65908	179.873	0.69157	191.034	0.7296	184.032	2.75052	182.423	2.94763	191.026	2.7429	184.169	2.65656	191.026	2.80968							191.026	5.49305	187.92	5.52363	191.027	5.86098	191.026	5.30411
												181.096	0.73329	180.529	0.67503	171.19	0.64707	191.281	0.65963	180.11	0.69213	191.286	0.73038	184.284	2.75598	182.663	2.95387	191.277	2.74883	184.42	2.66285	191.285	2.81597							191.277	5.50239	188.17	5.53226	191.277	5.87006	191.285	5.31135
												181.342	0.73432	180.773	0.67561	171.416	0.64781	191.54	0.6607	180.354	0.69279	191.545	0.73101	184.525	2.7618	182.912	2.9601	191.539	2.755	184.664	2.66933	191.536	2.82242							191.538	5.51137	188.422	5.54158	191.539	5.87883	191.536	5.31937
												181.581	0.73484	181.015	0.67655	171.648	0.64849	191.793	0.66134	180.595	0.69368	191.802	0.73212	184.777	2.76772	183.156	2.96625	191.791	2.76121	184.913	2.67565	191.797	2.82884							191.791	5.52065	188.677	5.55034	191.792	5.88801	191.797	5.32712
												181.826	0.7355	181.256	0.67714	171.876	0.64929	192.052	0.662	180.836	0.69451	192.056	0.7328	185.022	2.77359	183.399	2.9727	192.05	2.76744	185.161	2.68208	192.05	2.83526							192.05	5.53016	188.925	5.55977	192.05	5.89734	192.05	5.3351
												182.07	0.73664	181.502	0.67821	172.105	0.64955	192.308	0.6629	181.081	0.69505	192.315	0.7336	185.268	2.77889	183.648	2.97909	192.308	2.77352	185.405	2.68807	192.308	2.84192							192.308	5.53918	189.181	5.56887	192.308	5.90593	192.308	5.34323
												182.309	0.73717	181.739	0.67851	172.338	0.65063	192.563	0.66339	181.317	0.6957	192.568	0.73421	185.519	2.78459	183.888	2.98553	192.559	2.77991	185.655	2.69416	192.566	2.84838							192.559	5.54847	189.43	5.57819	192.559	5.91505	192.566	5.3506
												182.556	0.73799	181.985	0.67923	172.563	0.6513	192.821	0.66442	181.564	0.69629	192.827	0.73488	185.76	2.79038	184.137	2.99216	192.821	2.7861	185.901	2.70047	192.818	2.85485							192.82	5.55752	189.684	5.58742	192.821	5.92366	192.817	5.35856
												182.795	0.73883	182.225	0.6801	172.796	0.65192	193.075	0.66488	181.802	0.69731	193.083	0.73601	186.012	2.79591	184.379	2.9985	193.073	2.79233	186.149	2.70668	193.079	2.86111							193.073	5.56676	189.939	5.59571	193.073	5.9329	193.079	5.36603
												183.04	0.73941	182.467	0.68077	173.023	0.65311	193.333	0.6657	182.044	0.69764	193.338	0.73651	186.257	2.80165	184.625	3.00465	193.332	2.79876	186.398	2.71272	193.332	2.86784							193.332	5.57696	190.186	5.60476	193.332	5.94242	193.331	5.37361
												183.283	0.74027	182.711	0.68171	173.253	0.65347	193.591	0.66664	182.288	0.69869	193.596	0.73734	186.504	2.80724	184.872	3.01086	193.59	2.8052	186.641	2.71894	193.59	2.87447							193.59	5.58702	190.442	5.61348	193.59	5.95154	193.59	5.38165
												183.524	0.74097	182.949	0.68227	173.485	0.65468	193.844	0.66753	182.525	0.69923	193.85	0.73788	186.754	2.81322	185.112	3.01731	193.842	2.81153	186.892	2.72496	193.848	2.88118							193.842	5.59689	190.692	5.62228	193.842	5.96105	193.848	5.38936
												183.769	0.74179	183.194	0.68288	173.71	0.65499	194.105	0.66817	182.77	0.70002	194.108	0.73828	186.995	2.81894	185.361	3.02324	194.102	2.81784	187.136	2.73114	194.101	2.88757							194.102	5.60557	190.945	5.63175	194.102	5.96932	194.101	5.39741
												184.009	0.74271	183.434	0.68402	173.944	0.65594	194.356	0.66908	183.01	0.70082	194.366	0.73928	187.246	2.82459	185.603	3.02946	194.356	2.8242	187.385	2.73713	194.361	2.89389							194.356	5.61433	191.199	5.64034	194.356	5.97778	194.36	5.40454
												184.253	0.74301	183.676	0.6845	174.17	0.65669	194.616	0.66966	183.251	0.70135	194.619	0.73991	187.493	2.8304	185.849	3.03547	194.613	2.83046	187.633	2.74329	194.614	2.90041							194.613	5.62363	191.447	5.64931	194.613	5.98664	194.614	5.41167
												184.497	0.74426	183.921	0.6852	174.401	0.65743	194.872	0.67036	183.494	0.70211	194.88	0.74095	187.738	2.83618	186.096	3.0414	194.872	2.83672	187.877	2.74935	194.872	2.90701							194.872	5.63214	191.703	5.65776	194.873	5.99485	194.872	5.41871
												184.737	0.74492	184.159	0.68591	174.632	0.65861	195.127	0.67092	183.732	0.7027	195.132	0.7415	187.99	2.84202	186.336	3.04746	195.124	2.84308	188.128	2.75534	195.131	2.91364							195.124	5.6417	191.953	5.6665	195.124	6.00394	195.131	5.42542
												184.983	0.74566	184.404	0.68683	174.858	0.65908	195.386	0.67163	183.977	0.70356	195.392	0.74208	188.23	2.84765	186.584	3.05377	195.385	2.84937	188.372	2.76148	195.383	2.92041							195.385	5.65064	192.206	5.67557	195.385	6.01289	195.382	5.43289
												185.223	0.74654	184.645	0.68772	175.09	0.66012	195.639	0.67281	184.217	0.70434	195.648	0.74302	188.482	2.8532	186.829	3.06011	195.638	2.85571	188.621	2.76753	195.644	2.92696							195.638	5.65987	192.461	5.68419	195.638	6.02196	195.643	5.43955
												185.467	0.74692	184.886	0.68829	175.318	0.66088	195.898	0.67304	184.457	0.70494	195.902	0.74344	188.727	2.85896	187.072	3.06634	195.895	2.86178	188.869	2.77369	195.897	2.93359							195.896	5.66929	192.709	5.69321	195.896	6.03065	195.896	5.44589
												185.711	0.74773	185.131	0.68929	175.548	0.6614	196.154	0.67417	184.702	0.70588	196.161	0.74437	188.973	2.86454	187.32	3.07238	196.154	2.86809	189.113	2.7798	196.154	2.94015							196.154	5.67817	192.965	5.70201	196.154	6.03877	196.154	5.45241
												185.951	0.74817	185.368	0.69001	175.78	0.66238	196.408	0.67454	184.939	0.70646	196.414	0.74527	189.225	2.87023	187.561	3.07869	196.405	2.87444	189.363	2.78589	196.413	2.94669							196.406	5.68768	193.214	5.71122	196.406	6.048	196.412	5.45854
												186.197	0.74911	185.615	0.69067	176.005	0.66283	196.668	0.6756	185.184	0.70709	196.673	0.74579	189.465	2.87601	187.81	3.08507	196.667	2.88066	189.609	2.79216	196.664	2.9532							196.667	5.69664	193.468	5.72013	196.667	6.05675	196.664	5.46528
												186.435	0.75033	185.855	0.69141	176.238	0.66371	196.921	0.67603	185.424	0.70791	196.93	0.74686	189.717	2.88166	188.053	3.09155	196.919	2.88697	189.857	2.79825	196.926	2.95959							196.918	5.70583	193.722	5.72809	196.919	6.06528	196.926	5.47161
												186.681	0.75075	186.097	0.69193	176.465	0.66453	197.179	0.67687	185.665	0.70857	197.184	0.74733	189.962	2.88753	188.298	3.09802	197.178	2.89312	190.105	2.80439	197.177	2.96633							197.178	5.71529	193.97	5.73671	197.178	6.07435	197.177	5.47768
												186.925	0.75154	186.342	0.69288	176.696	0.66525	197.437	0.67804	185.91	0.70944	197.443	0.74818	190.209	2.89333	188.545	3.10434	197.436	2.89927	190.349	2.81063	197.437	2.97279							197.436	5.72405	194.226	5.74506	197.436	6.08277	197.437	5.48336
												187.165	0.75202	186.579	0.69345	176.927	0.66618	197.69	0.67849	186.146	0.71018	197.696	0.74892	190.459	2.89936	188.785	3.11044	197.688	2.9054	190.6	2.81697	197.694	2.97941							197.688	5.73333	194.475	5.7531	197.688	6.09158	197.694	5.48793
												187.411	0.75315	186.824	0.69408	177.152	0.66682	197.951	0.67967	186.392	0.71077	197.954	0.74956	190.701	2.9054	189.034	3.11662	197.947	2.91149	190.844	2.82335	197.947	2.98605							197.948	5.74158	194.729	5.76128	197.948	6.0997	197.946	5.49267
												187.65	0.75405	187.065	0.69519	177.386	0.66741	198.203	0.68007	186.631	0.71173	198.212	0.75042	190.951	2.91137	189.276	3.12275	198.202	2.9176	191.093	2.8296	198.206	2.99261							198.202	5.75037	194.983	5.76897	198.203	6.10803	198.206	5.49644
												187.895	0.75454	187.306	0.69561	177.612	0.66836	198.462	0.6809	186.872	0.71217	198.466	0.75104	191.198	2.91731	189.522	3.12898	198.46	2.92387	191.342	2.83596	198.461	2.99926							198.46	5.75994	195.231	5.77745	198.46	6.11667	198.461	5.49977
												188.139	0.75572	187.552	0.69644	177.843	0.66912	198.719	0.68138	187.117	0.71312	198.727	0.75183	191.443	2.92331	189.769	3.13532	198.719	2.92987	191.584	2.84211	198.718	3.00594							198.718	5.76847	195.486	5.78573	198.719	6.12453	198.718	5.50239
												188.378	0.75627	187.789	0.69707	178.074	0.67003	198.974	0.68258	187.354	0.7137	198.978	0.75263	191.695	2.92933	190.01	3.14145	198.97	2.93593	191.836	2.84802	198.977	3.01247							198.97	5.77724	195.737	5.79415	198.97	6.13265	198.977	5.50285
												188.624	0.75699	188.034	0.69777	178.299	0.67098	199.232	0.68334	187.598	0.71447	199.237	0.75327	191.935	2.93518	190.257	3.14761	199.231	2.94185	192.08	2.85434	199.229	3.01873							199.231	5.78542	195.989	5.80278	199.231	6.13999	199.228	5.5026
												188.864	0.75801	188.275	0.69874	178.532	0.67146	199.485	0.6843	187.839	0.71535	199.494	0.75426	192.187	2.94102	190.502	3.15376	199.483	2.94777	192.329	2.86066	199.489	3.02478							199.483	5.794	196.244	5.81074	199.483	6.14777	199.49	5.49991
												189.109	0.75857	188.516	0.69927	178.76	0.67239	199.744	0.68472	188.079	0.71588	199.749	0.75471	192.433	2.94705	190.746	3.16002	199.742	2.95395	192.578	2.86683	199.742	3.03121							199.741	5.80303	196.492	5.81956	199.742	6.15607	199.742	5.49391
												189.352	0.7598	188.762	0.70032	178.99	0.67276	200	0.6857	188.324	0.71692	200.008	0.75561	192.679	2.95311	190.994	3.16627	200	2.96032	192.822	2.87293	200	3.03777							200	5.81163	196.748	5.82801	200.001	6.1642	200	5.48193
												189.592	0.76041	188.998	0.70087	179.222	0.67354	200.255	0.68639	188.56	0.7177	200.261	0.75642	192.929	2.95919	191.234	3.17263	200.252	2.9666	193.072	2.87917	200.259	3.04431							200.252	5.82087	196.998	5.83696	200.252	6.17293	200.259	5.45716
												189.839	0.76136	189.245	0.70147	179.447	0.67429	200.514	0.68718	188.806	0.71817	200.519	0.75713	193.171	2.9652	191.483	3.17934	200.513	2.97273	193.317	2.88553	200.51	3.05076							200.513	5.82935	197.252	5.84569	200.514	6.18063	200.51	5.31194
												190.077	0.76214	189.485	0.70244	179.681	0.67496	200.767	0.6881	189.046	0.71927	200.776	0.75812	193.423	2.97105	191.726	3.18577	200.765	2.97879	193.565	2.8918	200.772	3.05726							200.765	5.83784	197.506	5.85322	200.765	6.18875	200.772	2.77326
												190.323	0.76289	189.726	0.70299	179.907	0.67577	201.025	0.68845	189.287	0.71959	201.03	0.75873	193.667	2.97733	191.97	3.19195	201.024	2.98488	193.813	2.89824	201.024	3.06415							201.024	5.847	197.753	5.86111	201.025	6.19717	201.016	0.15157
												190.566	0.76379	189.971	0.7039	180.138	0.6764	201.283	0.68979	189.531	0.72084	201.289	0.7594	193.914	2.98343	192.218	3.19817	201.282	2.99112	194.057	2.9048	201.283	3.07094							201.283	5.85586	198.009	5.86893	201.283	6.20533	201.027	0.03321
												190.807	0.76424	190.208	0.70477	180.369	0.6775	201.536	0.68983	189.768	0.72138	201.543	0.76022	194.164	2.98989	192.458	3.20468	201.535	2.99761	194.308	2.91138	201.541	3.07777							201.535	5.86531	198.259	5.87666	201.535	6.21411
												191.052	0.76514	190.455	0.7053	180.594	0.67819	201.796	0.69086	190.014	0.72222	201.801	0.76083	194.406	2.99612	192.707	3.21136	201.794	3.00367	194.552	2.91773	201.794	3.08436							201.794	5.87371	198.512	5.88452	201.794	6.2219
												191.292	0.76613	190.694	0.70635	180.827	0.67867	202.048	0.69156	190.253	0.72303	202.058	0.76161	194.657	3.00242	192.95	3.21776	202.048	3.0097	194.801	2.9241	202.053	3.09086							202.048	5.88193	198.767	5.892	202.049	6.2293
												191.536	0.7665	190.937	0.70687	181.054	0.67973	202.308	0.69216	190.494	0.72335	202.312	0.76223	194.903	3.00847	193.195	3.22398	202.305	3.01582	195.05	2.93045	202.307	3.09746							202.305	5.89058	199.015	5.89997	202.306	6.23679
												191.78	0.76761	191.181	0.70783	181.285	0.68024	202.565	0.69337	190.738	0.72409	202.572	0.76315	195.149	3.0146	193.442	3.23052	202.564	3.02184	195.293	2.93686	202.564	3.10376							202.565	5.89866	199.27	5.90752	202.565	6.24361
												192.02	0.76799	191.419	0.70849	181.517	0.68153	202.819	0.69375	190.975	0.72493	202.824	0.764	195.401	3.02084	193.682	3.23687	202.816	3.02775	195.544	2.94327	202.823	3.11025							202.816	5.9076	199.521	5.91538	202.816	6.2512
												192.266	0.76913	191.664	0.70927	181.742	0.68204	203.078	0.6951	191.219	0.72539	203.084	0.76467	195.641	3.02683	193.931	3.24316	203.077	3.03362	195.788	2.94982	203.075	3.11687							203.077	5.91611	199.773	5.92357	203.077	6.25806
												192.506	0.76974	191.905	0.71003	181.974	0.68298	203.331	0.69542	191.46	0.72652	203.34	0.76579	195.893	3.03287	194.175	3.24963	203.33	3.0398	196.037	2.95629	203.335	3.1236							203.33	5.9248	200.027	5.93104	203.33	6.26559
												192.75	0.77041	192.146	0.71052	182.202	0.68398	203.59	0.69629	191.7	0.72691	203.595	0.76622	196.138	3.039	194.419	3.25609	203.588	3.04603	196.285	2.96252	203.588	3.1302							203.588	5.93365	200.276	5.93958	203.588	6.27324
												192.994	0.77126	192.392	0.71153	182.431	0.68465	203.847	0.69737	191.946	0.72799	203.854	0.76709	196.383	3.04498	194.666	3.26262	203.846	3.05235	196.53	2.96887	203.847	3.13688							203.846	5.94167	200.532	5.94741	203.846	6.27989
												193.233	0.77183	192.628	0.71236	182.664	0.68564	204.101	0.69786	192.182	0.72866	204.106	0.76812	196.635	3.05128	194.906	3.26888	204.098	3.05864	196.78	2.97549	204.105	3.14341							204.097	5.9507	200.781	5.95524	204.098	6.28743
												193.48	0.77267	192.875	0.713	182.889	0.686	204.36	0.69871	192.428	0.72989	204.365	0.76852	196.876	3.05769	195.156	3.27528	204.36	3.06477	197.025	2.98216	204.357	3.15016							204.36	5.95935	201.034	5.96288	204.36	6.29436
												193.719	0.77353	193.115	0.71393	183.122	0.68694	204.614	0.69948	192.667	0.73011	204.622	0.76967	197.128	3.06376	195.399	3.28191	204.612	3.07117	197.273	2.98863	204.618	3.15688							204.612	5.96808	201.289	5.96994	204.612	6.30177
												193.964	0.77415	193.357	0.71434	183.349	0.68772	204.872	0.70037	192.909	0.73079	204.876	0.76993	197.373	3.0701	195.644	3.28847	204.87	3.07737	197.521	2.99509	204.87	3.16389							204.87	5.97722	201.537	5.97772	204.871	6.30937
												194.207	0.7754	193.602	0.7152	183.579	0.68851	205.129	0.70105	193.153	0.73172	205.136	0.77089	197.619	3.07645	195.892	3.29474	205.128	3.08347	197.766	3.00147	205.129	3.17072							205.128	5.9857	201.793	5.98509	205.128	6.31566
												194.448	0.77599	193.839	0.71587	183.811	0.68936	205.383	0.70182	193.39	0.7324	205.389	0.77162	197.87	3.08291	196.131	3.30097	205.38	3.08958	198.016	3.00793	205.387	3.1775							205.38	5.99427	202.042	5.99231	205.381	6.32204
												194.693	0.77685	194.085	0.71657	184.036	0.69021	205.643	0.70281	193.635	0.7333	205.647	0.77226	198.111	3.08891	196.38	3.30712	205.64	3.09573	198.261	3.01456	205.639	3.18437							205.64	6.00226	202.296	5.9998	205.64	6.3274
												194.933	0.77782	194.324	0.71759	184.271	0.69092	205.894	0.70353	193.874	0.73438	205.905	0.77317	198.362	3.09532	196.623	3.31336	205.894	3.10178	198.509	3.02096	205.898	3.19133							205.894	6.01055	202.55	6.00677	205.895	6.33285
												195.177	0.77839	194.566	0.71819	184.496	0.69175	206.155	0.70395	194.115	0.73469	206.158	0.77371	198.609	3.10167	196.868	3.31925	206.152	3.10819	198.759	3.02732	206.153	3.19791							206.152	6.01932	202.798	6.01431	206.152	6.33837
												195.422	0.77939	194.811	0.71926	184.727	0.69249	206.411	0.70513	194.359	0.73566	206.418	0.77445	198.854	3.10768	197.115	3.32552	206.411	3.11454	199.001	3.03375	206.411	3.2048							206.411	6.02714	203.054	6.02166	206.411	6.34236
												195.661	0.77991	195.049	0.71994	184.958	0.69338	206.665	0.70554	194.597	0.73608	206.669	0.77548	199.105	3.11331	197.356	3.33156	206.663	3.12066	199.252	3.03994	206.669	3.21155							206.663	6.03488	203.305	6.02929	206.663	6.34553
												195.908	0.78068	195.294	0.72071	185.184	0.69394	206.924	0.70665	194.841	0.7369	206.93	0.77606	199.346	3.11936	197.604	3.33741	206.923	3.12662	199.496	3.04609	206.922	3.21839							206.923	6.04217	203.557	6.03709	206.923	6.34671
												196.147	0.78161	195.535	0.72165	185.416	0.69517	207.177	0.70737	195.082	0.73771	207.187	0.77706	199.598	3.12502	197.848	3.34348	207.176	3.1328	199.746	3.0521	207.182	3.22511							207.176	6.04944	203.811	6.04347	207.176	6.3465
												196.392	0.78239	195.776	0.72225	185.645	0.69621	207.436	0.70801	195.322	0.73828	207.441	0.77754	199.843	3.13129	198.091	3.34969	207.434	3.139	199.994	3.05831	207.435	3.2319							207.434	6.05669	204.059	6.05107	207.434	6.34349
												196.635	0.78345	196.021	0.72299	185.874	0.69674	207.693	0.70881	195.567	0.73922	207.7	0.77846	200.09	3.13757	198.34	3.35572	207.692	3.14518	200.238	3.06463	207.693	3.23877							207.692	6.06372	204.316	6.05849	207.693	6.3349
												196.875	0.78394	196.258	0.72372	186.107	0.69784	207.947	0.70948	195.803	0.73993	207.953	0.7791	200.34	3.14352	198.58	3.36205	207.944	3.15153	200.488	3.07073	207.951	3.24561							207.944	6.0713	204.565	6.06603	207.944	6.3142
												197.122	0.78457	196.505	0.72445	186.331	0.6986	208.206	0.71051	196.049	0.74068	208.211	0.7799	200.581	3.14964	198.829	3.3682	208.206	3.15772	200.733	3.07708	208.203	3.25263							208.206	6.07801	204.819	6.07364	208.206	6.25374
												197.36	0.78565	196.745	0.72537	186.565	0.69925	208.459	0.71138	196.289	0.7416	208.468	0.78084	200.833	3.15553	199.071	3.37436	208.458	3.16397	200.981	3.08325	208.465	3.25944							208.458	6.08412	205.073	6.08027	208.458	4.80294
												197.605	0.78619	196.987	0.72586	186.791	0.70005	208.717	0.71185	196.53	0.74207	208.723	0.78155	201.078	3.16169	199.317	3.38031	208.716	3.17011	201.229	3.08937	208.716	3.26644							208.716	6.09007	205.32	6.08749	208.716	0.67868
												197.849	0.78742	197.231	0.7269	187.021	0.70048	208.976	0.71297	196.775	0.74305	208.981	0.78223	201.325	3.16798	199.564	3.38613	208.974	3.17644	201.474	3.09577	208.975	3.27331							208.974	6.09498	205.576	6.09387	208.823	-0.02235
												198.089	0.7879	197.468	0.72751	187.253	0.70143	209.229	0.7135	197.011	0.74377	209.235	0.78296	201.575	3.17436	199.804	3.39225	209.227	3.18291	201.724	3.10239	209.233	3.28043							209.227	6.10015	205.826	6.09977	208.823	-0.02499
												198.334	0.78883	197.715	0.72824	187.479	0.70212	209.489	0.71442	197.256	0.74451	209.493	0.78365	201.817	3.18067	200.053	3.39818	209.486	3.18897	201.968	3.10873	209.485	3.28766							209.486	6.10333	206.08	6.10599
												198.574	0.78971	197.955	0.72906	187.712	0.70284	209.741	0.71546	197.496	0.74538	209.751	0.78452	202.067	3.18695	200.296	3.40429	209.741	3.19519	202.217	3.11473	209.745	3.29451							209.741	6.10492	206.334	6.11209
												198.818	0.79047	198.197	0.72946	187.939	0.7041	210	0.71576	197.737	0.74591	210.004	0.78519	202.314	3.193	200.541	3.41037	209.998	3.20123	202.466	3.12085	209.999	3.30134							209.997	6.10533	206.582	6.11873
												199.063	0.79158	198.441	0.73051	188.169	0.70441	210.257	0.71676	197.981	0.74674	210.265	0.78596	202.56	3.19888	200.788	3.41634	210.257	3.20717	202.709	3.12692	210.256	3.30802							210.257	6.10379	206.838	6.12468
												199.303	0.79192	198.678	0.73121	188.401	0.70558	210.512	0.71743	198.218	0.74732	210.516	0.78682	202.811	3.20464	201.028	3.42218	210.508	3.21309	202.96	3.13311	210.516	3.31475							210.508	6.10108	207.088	6.13053
												199.549	0.79285	198.924	0.73199	188.626	0.70614	210.771	0.71845	198.462	0.74807	210.776	0.78746	203.052	3.21054	201.276	3.42814	210.769	3.21915	203.204	3.13979	210.767	3.32133							210.769	6.09451	207.34	6.13674
												199.788	0.7938	199.165	0.7328	188.859	0.70709	211.024	0.7192	198.703	0.74905	211.032	0.78845	203.303	3.21638	201.52	3.43439	211.022	3.22533	203.454	3.1463	211.028	3.32788							211.023	6.08235	207.595	6.14257
												200.033	0.79454	199.406	0.73344	189.086	0.70799	211.282	0.71966	198.944	0.74963	211.287	0.78905	203.549	3.22244	201.765	3.44081	211.281	3.23127	203.702	3.15274	211.281	3.33449							211.281	6.05358	207.843	6.14945
												200.277	0.79532	199.652	0.7345	189.316	0.70848	211.539	0.72073	199.189	0.75062	211.546	0.79006	203.795	3.22793	202.013	3.44671	211.539	3.23724	203.945	3.15877	211.539	3.34106							211.539	5.1884	208.099	6.15612
												200.516	0.7959	199.889	0.73511	189.549	0.7096	211.793	0.72155	199.425	0.75112	211.799	0.79084	204.046	3.23352	202.253	3.45281	211.79	3.24324	204.196	3.16496	211.797	3.34777							211.791	1.16762	208.349	6.16247
												200.763	0.79676	200.135	0.73586	189.773	0.71051	212.053	0.72249	199.671	0.7518	212.057	0.79136	204.287	3.23936	202.502	3.45893	212.052	3.24938	204.441	3.17149	212.049	3.35456							211.947	0.02341	208.602	6.16807
												201.001	0.79758	200.375	0.7368	190.006	0.71139	212.306	0.72299	199.91	0.75285	212.315	0.79239	204.539	3.24543	202.744	3.46512	212.304	3.25547	204.689	3.17803	212.311	3.36106							211.947	0.01965	208.856	6.17279
												201.247	0.79817	200.617	0.73745	190.234	0.71211	212.564	0.72371	200.152	0.75341	212.569	0.7928	204.783	3.25185	202.99	3.47147	212.562	3.26179	204.938	3.18434	212.563	3.36788									209.104	6.17793
												201.49	0.79912	200.861	0.7385	190.464	0.71271	212.822	0.72497	200.396	0.75435	212.828	0.79382	205.03	3.25743	203.237	3.47789	212.821	3.26813	205.181	3.19043	212.821	3.37477									209.36	6.18261
												201.731	0.79982	201.099	0.73924	190.696	0.71363	213.075	0.72537	200.633	0.75512	213.081	0.79436	205.28	3.26357	203.477	3.48417	213.072	3.27395	205.433	3.19653	213.079	3.38135									209.609	6.18703
												201.976	0.80098	201.345	0.7401	190.92	0.71449	213.336	0.72615	200.878	0.75586	213.34	0.79518	205.522	3.26974	203.726	3.49031	213.333	3.27966	205.676	3.20305	213.331	3.38888									209.863	6.19135
												202.216	0.80198	201.584	0.74104	191.155	0.71527	213.587	0.7271	201.117	0.75697	213.597	0.79614	205.773	3.27584	203.969	3.49648	213.586	3.28558	205.925	3.20926	213.591	3.3951									210.117	6.19416
												202.46	0.80248	201.826	0.74167	191.381	0.71602	213.847	0.72799	201.358	0.75729	213.85	0.79688	206.019	3.28208	204.213	3.50261	213.844	3.2916	206.174	3.21558	213.845	3.4011									210.365	6.19685
												202.705	0.80368	202.071	0.74277	191.612	0.71651	214.103	0.72866	201.602	0.75834	214.111	0.79781	206.265	3.28814	204.461	3.50905	214.103	3.29763	206.417	3.22224	214.103	3.40792									210.621	6.19801
												202.944	0.80414	202.308	0.74341	191.843	0.71752	214.358	0.72951	201.84	0.75884	214.362	0.79848	206.516	3.29383	204.701	3.51547	214.355	3.30367	206.669	3.22852	214.362	3.41411									210.871	6.19877
												203.19	0.8051	202.554	0.74421	192.068	0.71821	214.617	0.73028	202.084	0.75955	214.622	0.79908	206.757	3.30006	204.949	3.522	214.616	3.30949	206.912	3.23479	214.614	3.42094									211.124	6.19948
												203.429	0.80574	202.795	0.74507	192.3	0.71922	214.87	0.73121	202.326	0.76057	214.879	0.80013	207.009	3.30597	205.193	3.52864	214.868	3.31527	207.161	3.24111	214.875	3.42772									211.379	6.19689
												203.674	0.80654	203.036	0.74561	192.529	0.72007	215.128	0.73159	202.566	0.76108	215.133	0.80065	207.254	3.31201	205.438	3.53493	215.126	3.32106	207.41	3.24755	215.127	3.43413									211.626	6.19119
												203.918	0.8074	203.282	0.74665	192.759	0.72051	215.385	0.73311	202.811	0.7621	215.392	0.80147	207.5	3.31818	205.685	3.54118	215.385	3.32702	207.654	3.25416	215.385	3.44046									211.883	6.18014
												204.157	0.80823	203.519	0.7473	192.991	0.72232	215.64	0.73344	203.047	0.76268	215.646	0.80243	207.751	3.32409	205.925	3.54762	215.636	3.33313	207.904	3.26076	215.643	3.44671									212.132	6.16137
												204.405	0.80925	203.765	0.74817	193.215	0.72261	215.899	0.73435	203.292	0.76351	215.904	0.80311	207.993	3.33038	206.175	3.55414	215.898	3.33928	208.149	3.26739	215.895	3.45352									212.386	6.12621
												204.643	0.80988	204.005	0.74903	193.449	0.72391	216.152	0.73514	203.532	0.76444	216.161	0.80397	208.244	3.33632	206.418	3.56074	216.15	3.34543	208.397	3.27363	216.156	3.46023									212.64	5.54781
												204.888	0.81058	204.247	0.74965	193.675	0.72469	216.41	0.73613	203.774	0.76491	216.415	0.80449	208.488	3.34264	206.662	3.56708	216.409	3.35128	208.647	3.27994	216.409	3.46716									212.887	1.64569
												205.132	0.81169	204.492	0.75056	193.906	0.72546	216.668	0.737	204.018	0.76583	216.674	0.80562	208.736	3.34866	206.91	3.57346	216.666	3.35724	208.889	3.28668	216.668	3.47388									213.067	0.04431
												205.372	0.81225	204.728	0.75129	194.137	0.72633	216.921	0.73773	204.254	0.76657	216.927	0.8063	208.985	3.35495	207.15	3.57974	216.919	3.36351	209.141	3.29332	216.925	3.48061									213.068	0.02911
												205.617	0.81306	204.975	0.75204	194.362	0.72708	217.182	0.73861	204.499	0.76736	217.185	0.80698	209.228	3.36128	207.399	3.58613	217.179	3.36954	209.385	3.30004	217.177	3.48729
												205.857	0.81397	205.214	0.75326	194.597	0.72829	217.434	0.73967	204.739	0.76828	217.443	0.80785	209.478	3.36742	207.642	3.59238	217.433	3.37567	209.633	3.30647	217.437	3.49386
												206.102	0.81461	205.456	0.75382	194.823	0.72776	217.693	0.73998	204.98	0.76891	217.696	0.80845	209.725	3.37368	207.886	3.59855	217.691	3.3819	209.883	3.31271	217.691	3.50067
												206.346	0.81602	205.701	0.75463	195.053	0.7294	217.949	0.74123	205.224	0.76982	217.957	0.80946	209.97	3.37969	208.134	3.60482	217.949	3.38794	210.126	3.3192	217.949	3.50772
												206.586	0.81656	205.939	0.75543	195.285	0.73032	218.204	0.74156	205.462	0.77048	218.209	0.81042	210.221	3.38552	208.374	3.61143	218.201	3.39369	210.377	3.32578	218.208	3.51406
												206.831	0.81739	206.184	0.75622	195.51	0.73117	218.463	0.74277	205.705	0.7712	218.468	0.81117	210.463	3.39147	208.622	3.61753	218.462	3.39978	210.621	3.33234	218.459	3.52083
												207.071	0.81827	206.425	0.75702	195.743	0.73199	218.716	0.74349	205.947	0.77202	218.724	0.81201	210.714	3.39757	208.866	3.62361	218.715	3.40617	210.869	3.33875	218.72	3.52771
												207.316	0.81886	206.666	0.75758	195.971	0.73293	218.975	0.74419	206.187	0.77278	218.979	0.81266	210.959	3.40383	209.11	3.6299	218.973	3.41231	211.118	3.34516	218.973	3.53487
												207.56	0.82004	206.911	0.7588	196.2	0.73348	219.232	0.74505	206.431	0.77365	219.238	0.81375	211.205	3.40983	209.359	3.63604	219.231	3.41843	211.362	3.35171	219.232	3.54208
												207.799	0.82074	207.149	0.75938	196.433	0.73452	219.486	0.74571	206.669	0.77436	219.492	0.81453	211.456	3.41565	209.598	3.64231	219.482	3.42466	211.612	3.35823	219.49	3.54914
												208.046	0.82175	207.395	0.75994	196.657	0.73525	219.745	0.74696	206.914	0.77499	219.75	0.81493	211.698	3.42179	209.848	3.64872	219.744	3.4308	211.857	3.36468	219.741	3.55586
												208.284	0.82266	207.635	0.76088	196.891	0.73622	219.997	0.74739	207.154	0.77592	220.007	0.81605	211.949	3.428	210.09	3.65486	219.996	3.43694	212.105	3.37108	220.003	3.56248
												208.53	0.82315	207.877	0.76158	197.118	0.73727	220.256	0.74813	207.395	0.77651	220.261	0.81675	212.194	3.43429	210.335	3.66092	220.255	3.44318	212.355	3.37755	220.255	3.56902
												208.773	0.82437	208.122	0.76265	197.348	0.73798	220.514	0.74943	207.639	0.77772	220.52	0.81754	212.441	3.44029	210.583	3.66707	220.513	3.44976	212.598	3.38411	220.513	3.57599
												209.013	0.82491	208.359	0.76342	197.58	0.73897	220.767	0.75017	207.876	0.77874	220.773	0.81834	212.691	3.44659	210.822	3.67336	220.765	3.45633	212.849	3.39054	220.772	3.58312
												209.258	0.82596	208.605	0.76409	197.805	0.73965	221.028	0.75091	208.121	0.77914	221.032	0.81914	212.933	3.45258	211.072	3.67939	221.025	3.4625	213.093	3.39678	221.024	3.58952
												209.499	0.82684	208.845	0.76501	198.039	0.74037	221.279	0.75151	208.361	0.78017	221.289	0.82007	213.183	3.45854	211.315	3.68526	221.279	3.46852	213.342	3.40288	221.284	3.59626
												209.743	0.82738	209.087	0.76563	198.265	0.74138	221.539	0.75234	208.602	0.78066	221.543	0.82079	213.43	3.4648	211.559	3.69145	221.536	3.47453	213.59	3.40899	221.538	3.60319
												209.987	0.8284	209.331	0.7668	198.495	0.742	221.796	0.75354	208.846	0.78174	221.803	0.8216	213.675	3.47071	211.807	3.69771	221.795	3.48056	213.834	3.41521	221.795	3.60991
												210.227	0.82927	209.568	0.76744	198.727	0.74305	222.05	0.75435	209.083	0.78225	222.055	0.8225	213.927	3.4768	212.047	3.70398	222.047	3.48681	214.085	3.42153	222.054	3.61682
												210.472	0.8304	209.814	0.76833	198.952	0.74364	222.309	0.7548	209.327	0.78304	222.315	0.82311	214.168	3.48295	212.295	3.70942	222.307	3.49293	214.328	3.42792	222.306	3.62369
												210.713	0.83137	210.056	0.76933	199.185	0.74445	222.562	0.75592	209.569	0.78398	222.571	0.82427	214.419	3.48866	212.539	3.71576	222.561	3.49903	214.578	3.43401	222.566	3.63029
												210.957	0.83179	210.296	0.76994	199.413	0.74532	222.82	0.75636	209.809	0.78462	222.825	0.82466	214.665	3.49467	212.784	3.7224	222.819	3.50511	214.826	3.44037	222.819	3.63701
												211.201	0.83281	210.541	0.77117	199.642	0.7461	223.077	0.75761	210.053	0.7857	223.085	0.8256	214.911	3.50032	213.032	3.72877	223.076	3.51119	215.07	3.44669	223.078	3.6437
												211.441	0.83327	210.779	0.77178	199.875	0.74711	223.332	0.75838	210.29	0.78638	223.337	0.82643	215.162	3.5062	213.271	3.73519	223.329	3.51737	215.321	3.45292	223.336	3.65039
												211.687	0.8344	211.025	0.77245	200.1	0.74786	223.59	0.75928	210.536	0.78721	223.596	0.82722	215.404	3.5123	213.521	3.74164	223.59	3.52337	215.565	3.45932	223.587	3.65705
												211.926	0.83551	211.265	0.77328	200.333	0.74867	223.844	0.76015	210.776	0.78822	223.853	0.82834	215.655	3.51814	213.763	3.74798	223.842	3.52946	215.814	3.46553	223.848	3.66375
												212.171	0.83604	211.507	0.7739	200.56	0.74961	224.102	0.76073	211.017	0.78885	224.107	0.8289	215.899	3.52427	214.009	3.75391	224.101	3.53547	216.063	3.47196	224.101	3.67067
												212.415	0.83722	211.752	0.7749	200.79	0.75042	224.36	0.7616	211.261	0.7898	224.366	0.82969	216.146	3.53032	214.256	3.76013	224.359	3.54141	216.306	3.47829	224.36	3.67724
												212.655	0.83759	211.989	0.77566	201.022	0.75124	224.613	0.76224	211.498	0.79051	224.619	0.83054	216.396	3.53622	214.496	3.76643	224.612	3.54736	216.557	3.48442	224.618	3.6839
												212.9	0.8388	212.235	0.77634	201.246	0.75191	224.874	0.76323	211.743	0.79136	224.877	0.83121	216.638	3.5421	214.745	3.77229	224.871	3.55313	216.801	3.49068	224.871	3.69055
												213.14	0.83963	212.475	0.77741	201.481	0.75273	225.126	0.76419	211.982	0.79232	225.135	0.83219	216.888	3.54805	214.987	3.77813	225.125	3.55893	217.05	3.49688	225.13	3.69688
												213.384	0.83993	212.717	0.77802	201.707	0.75401	225.385	0.76483	212.223	0.79298	225.389	0.83282	217.135	3.55411	215.232	3.78426	225.383	3.56464	217.299	3.50326	225.384	3.70321
												213.628	0.8412	212.961	0.77909	201.938	0.75487	225.642	0.76579	212.468	0.79395	225.649	0.83377	217.381	3.56035	215.479	3.79016	225.642	3.57063	217.542	3.50943	225.641	3.71002
												213.868	0.84195	213.199	0.77993	202.169	0.75556	225.896	0.76656	212.705	0.7945	225.901	0.8347	217.632	3.5662	215.721	3.79629	225.893	3.57636	217.793	3.5155	225.9	3.71665
												214.114	0.8428	213.444	0.78071	202.394	0.75643	226.155	0.76752	212.949	0.79543	226.16	0.83532	217.873	3.57233	215.968	3.80252	226.154	3.58198	218.036	3.52152	226.152	3.72291
												214.354	0.84369	213.686	0.78183	202.627	0.75713	226.408	0.76848	213.19	0.79637	226.417	0.83648	218.124	3.57817	216.212	3.80871	226.407	3.58771	218.286	3.52752	226.413	3.72913
												214.598	0.84458	213.926	0.78244	202.855	0.75848	226.667	0.76921	213.43	0.79716	226.672	0.83715	218.37	3.58443	216.456	3.81498	226.665	3.59368	218.534	3.53398	226.665	3.73558
												214.843	0.84565	214.171	0.78349	203.084	0.7588	226.923	0.77029	213.675	0.79826	226.93	0.83799	218.617	3.59078	216.704	3.82126	226.923	3.5997	218.778	3.54052	226.924	3.74209
												215.082	0.84643	214.409	0.78403	203.317	0.75999	227.178	0.77085	213.912	0.79909	227.184	0.83883	218.867	3.59699	216.944	3.82778	227.175	3.60568	219.028	3.54692	227.182	3.74868
												215.328	0.84719	214.655	0.78495	203.541	0.76084	227.437	0.7719	214.158	0.79979	227.442	0.83932	219.109	3.60348	217.194	3.83431	227.436	3.61157	219.273	3.55333	227.434	3.75556
												215.567	0.84804	214.895	0.7858	203.775	0.76194	227.69	0.77272	214.397	0.80072	227.699	0.84065	219.359	3.60968	217.436	3.84089	227.688	3.61731	219.521	3.55968	227.695	3.76203
												215.813	0.84867	215.137	0.78653	204.002	0.76287	227.949	0.77333	214.638	0.80131	227.953	0.84097	219.605	3.6162	217.682	3.84769	227.947	3.6231	219.77	3.56604	227.947	3.76827
												216.056	0.84997	215.381	0.78745	204.232	0.76367	228.206	0.77471	214.883	0.80221	228.212	0.84222	219.851	3.62265	217.929	3.85397	228.205	3.62909	220.014	3.57248	228.206	3.77447
												216.296	0.85088	215.619	0.78831	204.464	0.76473	228.46	0.77519	215.119	0.80293	228.466	0.84309	220.102	3.62929	218.169	3.86001	228.457	3.63516	220.265	3.57908	228.464	3.78092
												216.541	0.8517	215.865	0.78887	204.689	0.7653	228.72	0.77612	215.365	0.80352	228.724	0.84406	220.344	3.63586	218.418	3.86609	228.717	3.64073	220.509	3.58569	228.716	3.78752
												216.781	0.85229	216.105	0.78971	204.923	0.76628	228.972	0.77708	215.604	0.80457	228.982	0.8449	220.594	3.64216	218.66	3.87239	228.972	3.64646	220.758	3.59208	228.976	3.79388
												217.025	0.85308	216.347	0.79032	205.148	0.76728	229.231	0.77782	215.845	0.8051	229.235	0.84565	220.841	3.64828	218.905	3.87866	229.228	3.65255	221.007	3.59832	229.23	3.80033
												217.27	0.8541	216.591	0.79138	205.38	0.76801	229.488	0.77891	216.089	0.80615	229.495	0.84641	221.086	3.65457	219.153	3.88485	229.488	3.6582	221.25	3.60449	229.487	3.80705
												217.51	0.85451	216.829	0.79217	205.611	0.76897	229.742	0.77942	216.326	0.80672	229.747	0.84723	221.337	3.66095	219.393	3.89062	229.739	3.66378	221.501	3.61038	229.747	3.81261
												217.756	0.85581	217.074	0.79306	205.837	0.76949	230.002	0.78054	216.571	0.80742	230.007	0.84794	221.578	3.66749	219.641	3.89641	230	3.6696	221.745	3.61639	229.998	3.81891
												217.995	0.85626	217.315	0.794	206.07	0.77043	230.254	0.7815	216.812	0.80878	230.263	0.849	221.83	3.67366	219.885	3.90259	230.253	3.67557	221.994	3.62207	230.259	3.82559
												218.24	0.85729	217.556	0.79474	206.297	0.7715	230.513	0.78231	217.052	0.8094	230.518	0.84983	222.075	3.68002	220.129	3.9091	230.512	3.6813	222.242	3.62726	230.512	3.83181
												218.484	0.85802	217.802	0.79558	206.527	0.77218	230.769	0.78349	217.297	0.81033	230.777	0.85064	222.321	3.68599	220.378	3.91536	230.769	3.68734	222.486	3.63268	230.77	3.8383
												218.723	0.85901	218.039	0.7967	206.758	0.77319	231.024	0.78409	217.533	0.81113	231.03	0.85133	222.572	3.692	220.618	3.92157	231.021	3.69341	222.736	3.63815	231.028	3.84503
												218.97	0.85987	218.285	0.79739	206.984	0.77411	231.283	0.785	217.779	0.81189	231.288	0.85199	222.813	3.69823	220.867	3.92742	231.282	3.69905	222.982	3.64376	231.28	3.85166
												219.208	0.86097	218.525	0.79833	207.217	0.77463	231.536	0.78596	218.018	0.81277	231.545	0.85306	223.065	3.70463	221.109	3.9337	231.534	3.70491	223.229	3.64953	231.541	3.85803
												219.454	0.86189	218.767	0.799	207.444	0.7759	231.794	0.78664	218.26	0.81339	231.799	0.85343	223.31	3.71101	221.354	3.93967	231.793	3.71114	223.479	3.65543	231.793	3.8645
												219.697	0.86249	219.012	0.80003	207.674	0.77633	232.053	0.78781	218.504	0.81443	232.058	0.85458	223.557	3.71727	221.602	3.94553	232.052	3.71755	223.722	3.66136	232.052	3.87164
												219.938	0.8633	219.249	0.80076	207.906	0.77747	232.306	0.78847	218.741	0.81517	232.312	0.85538	223.807	3.72338	221.842	3.95169	232.304	3.72396	223.973	3.66699	232.31	3.87885
												220.183	0.86427	219.495	0.80146	208.131	0.77826	232.566	0.78925	218.985	0.81584	232.57	0.85607	224.049	3.7296	222.091	3.95766	232.563	3.73011	224.217	3.67239	232.562	3.88589
												220.423	0.86534	219.735	0.80268	208.365	0.77888	232.818	0.79034	219.226	0.81692	232.828	0.85716	224.299	3.73565	222.333	3.9636	232.817	3.73581	224.466	3.67797	232.822	3.89231
												220.667	0.86577	219.976	0.80321	208.591	0.78029	233.077	0.79084	219.467	0.8175	233.081	0.85794	224.546	3.74167	222.578	3.96938	233.075	3.7414	224.715	3.68341	233.076	3.89877
												220.911	0.86701	220.221	0.80424	208.822	0.78064	233.334	0.79201	219.711	0.8186	233.341	0.85888	224.792	3.74782	222.826	3.97524	233.334	3.74704	224.958	3.68893	233.334	3.90563
												221.151	0.86785	220.459	0.80488	209.053	0.78206	233.589	0.79272	219.948	0.81929	233.594	0.85977	225.043	3.7537	223.066	3.98142	233.586	3.75274	225.209	3.69421	233.593	3.9122
												221.397	0.86877	220.704	0.80585	209.279	0.78275	233.848	0.79379	220.193	0.82021	233.853	0.86068	225.284	3.75944	223.314	3.98761	233.846	3.75839	225.453	3.69937	233.844	3.9188
												221.637	0.86997	220.945	0.80687	209.511	0.78382	234.1	0.79478	220.433	0.82105	234.109	0.8617	225.535	3.7651	223.558	3.99403	234.099	3.76397	225.702	3.7041	234.105	3.92528
												221.881	0.87047	221.187	0.8075	209.739	0.78482	234.359	0.7953	220.674	0.82162	234.364	0.86228	225.781	3.77124	223.802	4.00006	234.357	3.76925	225.951	3.7091	234.358	3.93194
												222.125	0.87154	221.432	0.80862	209.969	0.78523	234.616	0.79659	220.918	0.8231	234.623	0.86313	226.027	3.77736	224.05	4.00593	234.615	3.77466	226.194	3.71388	234.616	3.93863
												222.364	0.87213	221.668	0.80928	210.202	0.78648	234.87	0.79742	221.155	0.82345	234.875	0.86407	226.278	3.78331	224.29	4.01177	234.867	3.78039	226.445	3.71888	234.874	3.94508
												222.611	0.87324	221.915	0.81023	210.426	0.78722	235.13	0.79836	221.401	0.8241	235.134	0.86475	226.519	3.78977	224.539	4.01752	235.129	3.78611	226.69	3.72401	235.126	3.95188
												222.849	0.87403	222.155	0.81111	210.659	0.7884	235.383	0.79869	221.641	0.82535	235.391	0.86582	226.77	3.79559	224.782	4.02384	235.38	3.79185	226.938	3.72898	235.387	3.95855
												223.095	0.87472	222.397	0.81184	210.886	0.7894	235.641	0.79982	221.881	0.82592	235.646	0.86636	227.015	3.80158	225.027	4.02989	235.64	3.79738	227.186	3.73384	235.639	3.96539
												223.339	0.87613	222.642	0.81288	211.117	0.79023	235.898	0.8009	222.126	0.82688	235.905	0.86739	227.262	3.80746	225.275	4.03574	235.897	3.8029	227.43	3.73866	235.898	3.97223
												223.579	0.87652	222.879	0.81379	211.348	0.79127	236.152	0.80158	222.363	0.8278	236.158	0.86832	227.512	3.81388	225.514	4.04196	236.149	3.80827	227.68	3.7431	236.156	3.97855
												223.825	0.87746	223.125	0.81451	211.573	0.79177	236.413	0.80249	222.608	0.82827	236.416	0.8691	227.755	3.82003	225.763	4.04764	236.409	3.81364	227.925	3.74743	236.408	3.98485
												224.064	0.87872	223.365	0.81562	211.807	0.79271	236.664	0.80349	222.848	0.82939	236.674	0.87017	228.005	3.82606	226.006	4.05353	236.664	3.81927	228.174	3.75109	236.668	3.99135
												224.309	0.87942	223.607	0.8161	212.033	0.79394	236.924	0.80416	223.088	0.83007	236.927	0.87064	228.252	3.8321	226.251	4.05944	236.921	3.82476	228.423	3.75389	236.922	3.99775
												224.553	0.88062	223.852	0.8173	212.263	0.79449	237.18	0.80536	223.333	0.83118	237.188	0.87172	228.497	3.83816	226.499	4.06536	237.181	3.8301	228.666	3.75622	237.18	4.00374
												224.792	0.88152	224.089	0.81809	212.495	0.79563	237.435	0.80589	223.57	0.83168	237.439	0.87242	228.749	3.84395	226.739	4.07142	237.431	3.83567	228.917	3.75775	237.439	4.00955
												225.038	0.88251	224.334	0.81897	212.721	0.7962	237.694	0.80713	223.814	0.83268	237.699	0.87317	228.989	3.84999	226.987	4.07783	237.692	3.84095	229.161	3.75855	237.69	4.01522
												225.278	0.88323	224.575	0.81984	212.953	0.79732	237.947	0.80812	224.055	0.83366	237.956	0.87418	229.241	3.85606	227.231	4.08428	237.945	3.84628	229.41	3.75792	237.951	4.02054
												225.523	0.88396	224.816	0.82056	213.181	0.79818	238.205	0.80869	224.295	0.83438	238.21	0.87474	229.486	3.86213	227.475	4.09095	238.203	3.85182	229.659	3.75402	238.204	4.02584
												225.766	0.88481	225.062	0.82156	213.411	0.79884	238.462	0.80985	224.541	0.83553	238.469	0.87594	229.732	3.86812	227.723	4.09755	238.462	3.85758	229.903	3.74696	238.462	4.03056
												226.006	0.8854	225.299	0.82236	213.644	0.79997	238.716	0.81051	224.776	0.83623	238.722	0.87684	229.983	3.87413	227.963	4.10411	238.713	3.86308	230.153	3.7361	238.721	4.03534
												226.253	0.8865	225.545	0.82323	213.868	0.80063	238.975	0.81152	225.023	0.83705	238.98	0.87763	230.224	3.88043	228.213	4.11054	238.975	3.86825	230.398	3.33014	238.972	4.04031
												226.491	0.88772	225.785	0.82434	214.101	0.8017	239.229	0.81222	225.262	0.83787	239.237	0.87879	230.476	3.88666	228.455	4.1168	239.227	3.87327	230.646	0.85078	239.233	4.04494
												226.737	0.88843	226.027	0.82503	214.328	0.80265	239.487	0.81279	225.503	0.83861	239.492	0.87955	230.722	3.89309	228.7	4.12311	239.486	3.8787	230.798	-0.0294	239.485	4.04993
												226.98	0.88953	226.272	0.82602	214.559	0.80359	239.745	0.814	225.747	0.83957	239.751	0.88044	230.968	3.89974	228.948	4.12911	239.744	3.88424	230.798	-0.03472	239.744	4.05371
												227.221	0.89025	226.509	0.82684	214.79	0.80473	239.998	0.8146	225.984	0.84045	240.004	0.88104	231.218	3.9062	229.188	4.13533	239.996	3.89002			240.002	4.05786
												227.466	0.89131	226.756	0.82771	215.015	0.80548	240.258	0.81583	226.23	0.8413	240.262	0.88213	231.46	3.91239	229.437	4.14152	240.255	3.89551			240.255	4.06165
												227.706	0.89208	226.995	0.8287	215.249	0.80634	240.51	0.81669	226.469	0.84218	240.52	0.88317	231.71	3.91827	229.679	4.14791	240.51	3.90071			240.514	4.06467
												227.95	0.89257	227.237	0.82932	215.475	0.80742	240.77	0.81758	226.71	0.84305	240.773	0.88379	231.957	3.92422	229.924	4.15412	240.767	3.90594			240.769	4.06688
												228.195	0.89394	227.481	0.83042	215.706	0.80824	241.026	0.8188	226.954	0.84399	241.034	0.88473	232.202	3.93045	230.171	4.16007	241.026	3.9112			241.026	4.06772
												228.434	0.89461	227.719	0.83119	215.938	0.80935	241.281	0.81914	227.191	0.84481	241.285	0.88572	232.454	3.9365	230.412	4.16635	241.277	3.91646			241.285	4.06682
												228.68	0.89568	227.964	0.83213	216.163	0.81022	241.54	0.82023	227.435	0.84548	241.545	0.88659	232.695	3.94268	230.66	4.1726	241.538	3.92199			241.536	4.06419
												228.919	0.89644	228.206	0.83331	216.395	0.81125	241.793	0.82114	227.676	0.84652	241.802	0.88741	232.946	3.94836	230.904	4.17864	241.792	3.92757			241.797	4.05908
												229.164	0.89725	228.447	0.83381	216.623	0.81244	242.051	0.82193	227.916	0.84715	242.056	0.88813	233.191	3.95414	231.148	4.18477	242.049	3.93256			242.051	4.04996
												229.408	0.89867	228.692	0.83478	216.853	0.81327	242.308	0.82303	228.162	0.84826	242.316	0.8892	233.437	3.96019	231.396	4.19082	242.308	3.93768			242.308	4.0133
												229.647	0.89929	228.929	0.83557	217.085	0.81414	242.562	0.82395	228.398	0.84913	242.568	0.89028	233.689	3.96615	231.636	4.19697	242.559	3.9432			242.566	2.66336
												229.894	0.90032	229.175	0.83656	217.31	0.81492	242.822	0.82473	228.644	0.84981	242.827	0.89079	233.929	3.97242	231.885	4.20333	242.821	3.94858			242.818	0.22251
												230.132	0.90114	229.415	0.83748	217.544	0.81594	243.075	0.82572	228.883	0.8508	243.084	0.89185	234.182	3.9784	232.129	4.2097	243.073	3.95416			242.874	-0.00905
												230.378	0.90187	229.657	0.83849	217.77	0.81707	243.334	0.8265	229.125	0.8515	243.338	0.89265	234.427	3.98423	232.373	4.21602	243.332	3.95972			242.874	0.07984
												230.621	0.90324	229.902	0.83941	218	0.81798	243.591	0.82758	229.369	0.85268	243.597	0.89356	234.673	3.99012	232.621	4.22197	243.589	3.9651
												230.862	0.90387	230.139	0.84024	218.232	0.81876	243.844	0.82847	229.606	0.85343	243.85	0.89452	234.923	3.99616	232.861	4.22818	243.842	3.97045
												231.107	0.90479	230.385	0.8412	218.457	0.81961	244.104	0.8291	229.851	0.85417	244.109	0.89521	235.165	4.00245	233.109	4.23399	244.102	3.97553
												231.347	0.90602	230.625	0.84236	218.692	0.8204	244.356	0.83039	230.091	0.85535	244.366	0.89644	235.415	4.00872	233.352	4.23992	244.356	3.98061
												231.591	0.90642	230.867	0.84295	218.917	0.82163	244.616	0.83087	230.332	0.85583	244.619	0.89692	235.663	4.015	233.597	4.24576	244.613	3.98566
												231.836	0.9078	231.111	0.84413	219.149	0.82223	244.873	0.83234	230.576	0.85691	244.88	0.89796	235.907	4.02117	233.845	4.25173	244.873	3.99064
												232.076	0.90832	231.349	0.84483	219.379	0.82337	245.127	0.83287	230.813	0.85759	245.132	0.89875	236.159	4.02718	234.085	4.25792	245.124	3.99534
												232.321	0.90976	231.594	0.84571	219.605	0.82424	245.386	0.83405	231.057	0.85851	245.391	0.89947	236.399	4.03306	234.333	4.26403	245.385	3.99948
												232.56	0.91015	231.835	0.84662	219.837	0.82518	245.639	0.83481	231.298	0.85951	245.648	0.90069	236.652	4.03884	234.577	4.27001	245.637	4.00169
												232.805	0.91071	232.076	0.8474	220.066	0.82638	245.897	0.83559	231.538	0.86022	245.902	0.9013	236.897	4.04488	234.821	4.27601	245.895	4.0003
												233.049	0.91223	232.321	0.84851	220.295	0.82704	246.155	0.83701	231.783	0.86126	246.162	0.90234	237.143	4.05102	235.069	4.28217	246.154	3.99632
												233.289	0.91279	232.559	0.84954	220.528	0.82838	246.409	0.8376	232.02	0.86196	246.415	0.9032	237.394	4.05692	235.309	4.28831	246.405	3.98882
												233.536	0.91401	232.805	0.85037	220.752	0.8293	246.668	0.83866	232.266	0.86282	246.673	0.90379	237.635	4.06328	235.559	4.29464	246.667	3.97361
												233.774	0.9147	233.045	0.85123	220.986	0.83009	246.921	0.83931	232.505	0.864	246.931	0.90524	237.887	4.06936	235.801	4.30067	246.92	3.94084
												234.019	0.91589	233.287	0.85185	221.212	0.83109	247.179	0.84033	232.746	0.86467	247.184	0.90608	238.131	4.07558	236.046	4.30634	247.178	3.01817
												234.263	0.91697	233.532	0.85324	221.442	0.83172	247.437	0.84139	232.991	0.86588	247.443	0.90704	238.378	4.08183	236.294	4.31203	247.436	0.41683
												234.503	0.91733	233.769	0.85388	221.674	0.83292	247.69	0.84209	233.227	0.86669	247.696	0.90767	238.629	4.08797	236.534	4.31798	247.538	-0.01277
												234.749	0.91865	234.015	0.8547	221.899	0.83367	247.951	0.84342	233.472	0.86743	247.954	0.90857	238.87	4.09379	236.783	4.32391	247.539	0.08963
												234.988	0.91959	234.254	0.85575	222.133	0.8347	248.202	0.84414	233.712	0.86871	248.212	0.90957	239.121	4.09938	237.025	4.32982
												235.233	0.92103	234.497	0.85632	222.359	0.83533	248.462	0.84507	233.953	0.86938	248.466	0.91026	239.367	4.10507	237.27	4.33581
												235.477	0.92173	234.741	0.85745	222.59	0.83609	248.718	0.84616	234.197	0.87045	248.726	0.91124	239.613	4.11136	237.518	4.34185
												235.717	0.92287	234.979	0.85831	222.822	0.8376	248.973	0.84684	234.434	0.87127	248.977	0.91222	239.864	4.11739	237.758	4.3477
												235.963	0.92331	235.224	0.8592	223.047	0.83838	249.233	0.84784	234.678	0.87203	249.237	0.91302	240.105	4.12377	238.006	4.35315
												236.202	0.92464	235.466	0.86032	223.28	0.83955	249.486	0.84868	234.92	0.87323	249.494	0.91427	240.357	4.13	238.25	4.35909
												236.446	0.92534	235.706	0.86104	223.508	0.8407	249.744	0.84963	235.16	0.87396	249.748	0.91486	240.602	4.13584	238.494	4.36541
												236.691	0.92665	235.952	0.8621	223.737	0.84134	250	0.85067	235.405	0.87478	250.008	0.91592	240.848	4.14161	238.742	4.37155
												236.93	0.92751	236.189	0.86307	223.97	0.8425	250.255	0.85166	235.642	0.87564	250.261	0.91671	241.099	4.14763	238.982	4.37759
												237.177	0.92844	236.435	0.86394	224.194	0.84344	250.514	0.85275	235.888	0.87647	250.519	0.91768	241.34	4.15385	239.232	4.38362
												237.415	0.92929	236.675	0.86491	224.428	0.84439	250.767	0.85374	236.126	0.87753	250.776	0.91876	241.592	4.16012	239.474	4.3899
												237.661	0.93012	236.917	0.86572	224.655	0.84545	251.026	0.85448	236.368	0.87823	251.03	0.91948	241.837	4.16618	239.719	4.39631
												237.904	0.93163	237.162	0.86678	224.885	0.84618	251.283	0.85555	236.612	0.87937	251.29	0.92044	242.084	4.17226	239.967	4.40266
												238.144	0.93237	237.399	0.86767	225.116	0.84741	251.536	0.85647	236.849	0.88021	251.542	0.92132	242.333	4.17884	240.207	4.40911
												238.39	0.93318	237.645	0.86851	225.341	0.84828	251.797	0.85725	237.094	0.88108	251.801	0.92218	242.575	4.18508	240.455	4.41523
												238.63	0.93384	237.885	0.8697	225.576	0.84939	252.048	0.85838	237.334	0.88214	252.058	0.92323	242.826	4.19146	240.698	4.4213
												238.875	0.93459	238.127	0.87028	225.802	0.85063	252.308	0.8592	237.575	0.88262	252.312	0.9239	243.073	4.19805	240.943	4.42733
												239.118	0.93646	238.371	0.87149	226.033	0.85125	252.565	0.86009	237.819	0.88387	252.573	0.9249	243.319	4.2046	241.19	4.4332
												239.358	0.93642	238.609	0.87221	226.264	0.85249	252.819	0.86073	238.056	0.88469	252.824	0.926	243.569	4.21077	241.431	4.43944
												239.604	0.93805	238.854	0.87335	226.489	0.85313	253.078	0.86188	238.3	0.88555	253.083	0.9268	243.811	4.21697	241.679	4.44561
												239.843	0.9382	239.096	0.87424	226.722	0.85404	253.332	0.86295	238.541	0.8866	253.34	0.92822	244.062	4.22322	241.923	4.45187
												240.088	0.93979	239.336	0.87511	226.95	0.85514	253.59	0.86343	238.781	0.8873	253.595	0.92864	244.307	4.22962	242.167	4.45799
												240.332	0.94028	239.581	0.87626	227.18	0.85602	253.847	0.86511	239.027	0.88849	253.854	0.92948	244.554	4.23604	242.415	4.46377
												240.571	0.94161	239.819	0.8771	227.412	0.85722	254.101	0.8655	239.263	0.88917	254.107	0.93038	244.804	4.24227	242.655	4.46985
												240.819	0.94219	240.065	0.87799	227.636	0.85808	254.361	0.86673	239.509	0.89011	254.365	0.93103	245.046	4.24875	242.904	4.47572
												241.057	0.94318	240.305	0.87903	227.87	0.85913	254.613	0.86758	239.748	0.89115	254.622	0.93255	245.297	4.25458	243.147	4.48159
												241.302	0.94404	240.547	0.87961	228.097	0.86013	254.871	0.86833	239.989	0.89183	254.877	0.93309	245.542	4.26054	243.392	4.48755
												241.546	0.94538	240.792	0.88086	228.326	0.86105	255.129	0.8695	240.234	0.89296	255.136	0.93436	245.789	4.26666	243.64	4.49305
												241.786	0.94656	241.028	0.88161	228.559	0.86202	255.383	0.87045	240.47	0.89373	255.389	0.93504	246.039	4.27295	243.88	4.4986
												242.031	0.94691	241.275	0.88251	228.783	0.86305	255.644	0.87122	240.716	0.8946	255.647	0.936	246.281	4.27937	244.129	4.50449
												242.271	0.94815	241.515	0.88365	229.018	0.86397	255.895	0.87233	240.955	0.89579	255.905	0.93706	246.532	4.28543	244.371	4.51015
												242.515	0.94852	241.757	0.88454	229.244	0.86532	256.155	0.87296	241.196	0.89625	256.157	0.9378	246.778	4.29126	244.616	4.51583
												242.759	0.9502	242.002	0.88559	229.475	0.86602	256.41	0.87409	241.441	0.89754	256.419	0.93873	247.024	4.29719	244.864	4.52176
												243	0.95116	242.24	0.8863	229.706	0.86731	256.665	0.87455	241.678	0.89829	256.67	0.93984	247.275	4.30314	245.104	4.52776
												243.245	0.95195	242.484	0.88732	229.931	0.86825	256.925	0.87611	241.922	0.89911	256.93	0.94061	247.517	4.30894	245.352	4.53344
												243.485	0.95327	242.726	0.8885	230.164	0.86927	257.177	0.87725	242.163	0.90012	257.186	0.94175	247.767	4.31461	245.596	4.53926
												243.73	0.95376	242.966	0.88935	230.392	0.87014	257.436	0.87759	242.403	0.90092	257.441	0.94242	248.013	4.32034	245.84	4.54541
												243.974	0.9553	243.211	0.89067	230.621	0.8712	257.693	0.87884	242.648	0.9023	257.7	0.94339	248.259	4.32636	246.088	4.55178
												244.213	0.95568	243.449	0.89135	230.854	0.87239	257.947	0.87947	242.885	0.90317	257.953	0.94424	248.51	4.33233	246.328	4.55827
												244.46	0.95705	243.695	0.89231	231.078	0.87324	258.206	0.88061	243.13	0.90394	258.211	0.94497	248.752	4.33853	246.578	4.56456
												244.698	0.958	243.935	0.89337	231.312	0.87434	258.459	0.88157	243.37	0.90491	258.468	0.94623	249.003	4.34457	246.82	4.57066
												244.944	0.9586	244.177	0.89411	231.539	0.87535	258.718	0.88251	243.611	0.90578	258.723	0.94701	249.247	4.35092	247.065	4.57664
												245.187	0.96	244.422	0.89506	231.769	0.87619	258.975	0.88355	243.855	0.90673	258.982	0.94799	249.494	4.35743	247.312	4.58229
												245.427	0.96069	244.659	0.89596	232.001	0.87736	259.228	0.88437	244.092	0.90778	259.235	0.9489	249.745	4.36398	247.552	4.58832
												245.673	0.96171	244.905	0.89698	232.225	0.87818	259.49	0.88545	244.337	0.90857	259.493	0.94979	249.986	4.37027	247.802	4.5944
												245.913	0.96273	245.145	0.89812	232.46	0.87915	259.741	0.88642	244.577	0.9097	259.751	0.95116	250.237	4.37633	248.044	4.6
												246.157	0.96363	245.387	0.89879	232.686	0.88022	260.001	0.88723	244.818	0.91012	260.004	0.95185	250.483	4.38269	248.289	4.60565
												246.401	0.96491	245.631	0.90002	232.917	0.88148	260.257	0.88832	245.062	0.91148	260.265	0.95284	250.729	4.38913	248.536	4.61129
												246.641	0.96558	245.869	0.90083	233.148	0.8823	260.512	0.88922	245.299	0.91214	260.516	0.95391	250.98	4.39529	248.777	4.61694
												246.887	0.96703	246.114	0.90188	233.373	0.88305	260.771	0.89044	245.543	0.9133	260.776	0.95471	251.222	4.40129	249.025	4.62267
												247.126	0.96812	246.356	0.903	233.606	0.88459	261.023	0.89137	245.785	0.91428	261.033	0.9556	251.473	4.40691	249.269	4.6286
												247.371	0.96908	246.597	0.90378	233.834	0.8853	261.282	0.892	246.025	0.91498	261.287	0.95629	251.718	4.41247	249.513	4.6346
												247.615	0.97006	246.841	0.90498	234.064	0.88639	261.539	0.89315	246.269	0.91618	261.546	0.95721	251.965	4.41843	249.762	4.6402
												247.855	0.9709	247.079	0.90587	234.296	0.88733	261.794	0.89416	246.506	0.91695	261.799	0.95817	252.215	4.42453	250.001	4.64606
												248.101	0.97202	247.325	0.90684	234.52	0.88839	262.052	0.89501	246.752	0.9181	262.057	0.95894	252.457	4.43085	250.25	4.6518
												248.34	0.97322	247.565	0.9077	234.754	0.88939	262.306	0.89601	246.991	0.91907	262.314	0.96014	252.708	4.43678	250.493	4.65752
												248.585	0.9739	247.807	0.9086	234.981	0.89041	262.564	0.89683	247.233	0.91974	262.569	0.96092	252.953	4.44288	250.738	4.66329
												248.829	0.97529	248.052	0.90971	235.211	0.89136	262.822	0.89819	247.477	0.92089	262.828	0.96207	253.199	4.44875	250.986	4.66894
												249.069	0.97567	248.289	0.9106	235.443	0.89229	263.075	0.89904	247.714	0.92184	263.082	0.96297	253.45	4.45471	251.225	4.67493
												249.314	0.97692	248.535	0.91148	235.667	0.8934	263.336	0.90018	247.959	0.92289	263.339	0.96391	253.692	4.46097	251.475	4.68036
												249.554	0.97826	248.775	0.91269	235.902	0.89408	263.587	0.90104	248.198	0.92378	263.597	0.96503	253.942	4.46719	251.717	4.68553
												249.799	0.9791	249.017	0.91349	236.128	0.89556	263.847	0.90177	248.439	0.92474	263.85	0.96591	254.189	4.47326	251.962	4.69098
												250.042	0.98015	249.261	0.91464	236.359	0.89622	264.104	0.903	248.684	0.92596	264.111	0.96678	254.434	4.47933	252.209	4.69625
												250.282	0.98081	249.5	0.91549	236.59	0.8976	264.358	0.90372	248.921	0.92684	264.363	0.96781	254.686	4.48548	252.45	4.70177
												250.528	0.98217	249.744	0.9165	236.815	0.89846	264.617	0.90477	249.165	0.92755	264.622	0.96863	254.926	4.49173	252.698	4.70683
												250.768	0.98317	249.986	0.91767	237.048	0.89959	264.87	0.90571	249.406	0.92853	264.879	0.96972	255.178	4.49765	252.942	4.7115
												251.012	0.98399	250.227	0.91858	237.276	0.90087	265.128	0.90672	249.647	0.92944	265.133	0.97046	255.424	4.50365	253.186	4.71571
												251.257	0.9848	250.471	0.91973	237.506	0.90157	265.385	0.90822	249.891	0.93048	265.392	0.97181	255.67	4.51002	253.434	4.71838
												251.496	0.98598	250.709	0.92076	237.738	0.90292	265.64	0.90884	250.128	0.93165	265.645	0.97292	255.921	4.51602	253.674	4.71478
												251.742	0.98702	250.956	0.92187	237.963	0.90408	265.899	0.91012	250.374	0.93255	265.904	0.97353	256.162	4.52218	253.923	4.69878
												251.981	0.98768	251.195	0.92291	238.196	0.90503	266.152	0.91083	250.613	0.93359	266.16	0.97472	256.413	4.52816	254.166	4.48795
												252.227	0.98875	251.437	0.92382	238.423	0.90609	266.41	0.91176	250.854	0.93436	266.415	0.9755	256.658	4.53435	254.411	1.87233
												252.47	0.99007	251.682	0.9251	238.654	0.90695	266.667	0.91336	251.098	0.93592	266.674	0.97665	256.905	4.54078	254.631	0.01796
												252.71	0.99082	251.919	0.92608	238.885	0.90817	266.922	0.91388	251.335	0.93657	266.927	0.9776	257.156	4.54714	254.633	-0.02905
												252.955	0.99193	252.165	0.92686	239.11	0.90911	267.181	0.91512	251.581	0.93728	267.186	0.97824	257.397	4.55352
												253.195	0.99285	252.405	0.92792	239.344	0.91011	267.433	0.91618	251.82	0.9384	267.443	0.97978	257.648	4.55983
												253.44	0.99388	252.647	0.92867	239.57	0.91125	267.693	0.91718	252.061	0.93908	267.697	0.98053	257.894	4.56589
												253.684	0.99498	252.891	0.92987	239.801	0.91225	267.949	0.91821	252.305	0.94025	267.957	0.98163	258.139	4.57222
												253.924	0.99622	253.129	0.93048	240.032	0.91338	268.204	0.91873	252.543	0.94111	268.209	0.9826	258.391	4.57846
												254.17	0.99739	253.374	0.93156	240.257	0.9141	268.464	0.91978	252.786	0.94209	268.468	0.9834	258.631	4.5851
												254.409	0.99803	253.616	0.93265	240.491	0.91518	268.716	0.9209	253.028	0.94315	268.725	0.98443	258.884	4.59146
												254.654	0.99891	253.857	0.9336	240.718	0.91653	268.975	0.92178	253.268	0.94395	268.979	0.98528	259.129	4.59805
												254.898	1.00079	254.102	0.93477	240.948	0.91716	269.231	0.92302	253.513	0.94503	269.238	0.98653	259.375	4.60436
												255.137	1.0009	254.339	0.93583	241.18	0.91873	269.486	0.9239	253.75	0.94587	269.491	0.98741	259.625	4.61072
												255.384	1.00246	254.585	0.9368	241.405	0.91936	269.744	0.9252	253.995	0.94691	269.75	0.98819	259.867	4.61725
												255.622	1.00331	254.825	0.93791	241.638	0.92045	269.998	0.92584	254.235	0.94794	270.006	0.98941	260.119	4.62373
												255.868	1.00411	255.067	0.93883	241.865	0.92167	270.255	0.92683	254.476	0.94906	270.261	0.99028	260.363	4.63033
												256.111	1.0056	255.312	0.94003	242.096	0.92267	270.514	0.92808	254.721	0.94994	270.52	0.99159	260.61	4.63668
												256.351	1.00659	255.549	0.94096	242.327	0.92391	270.767	0.929	254.957	0.95093	270.774	0.9923	260.861	4.64285
												256.597	1.00751	255.795	0.94192	242.552	0.92521	271.028	0.93003	255.202	0.9518	271.031	0.99315	261.103	4.64908
												256.837	1.00863	256.035	0.94329	242.786	0.92583	271.279	0.93125	255.442	0.95295	271.289	0.99432	261.353	4.65515
												257.081	1.00933	256.277	0.94396	243.012	0.92705	271.539	0.93178	255.683	0.95365	271.543	0.99521	261.599	4.66147
												257.325	1.0107	256.521	0.94518	243.243	0.92787	271.796	0.93338	255.927	0.95486	271.803	0.9962	261.845	4.66799
												257.565	1.01174	256.759	0.94604	243.474	0.92917	272.05	0.9338	256.164	0.95591	272.055	0.99721	262.097	4.67419
												257.811	1.01294	257.005	0.94716	243.7	0.93011	272.309	0.93498	256.409	0.95678	272.315	0.99805	262.337	4.68036
												258.05	1.01372	257.245	0.94819	243.932	0.93136	272.562	0.936	256.649	0.958	272.571	0.99935	262.589	4.68624
												258.295	1.01502	257.487	0.949	244.16	0.93244	272.82	0.93709	256.89	0.95888	272.825	1.00009	262.834	4.69237
												258.539	1.0162	257.732	0.95018	244.389	0.93337	273.077	0.93831	257.135	0.96013	273.085	1.00129	263.08	4.69879
												258.779	1.01675	257.969	0.95147	244.623	0.93454	273.332	0.93865	257.371	0.96118	273.337	1.00227	263.331	4.70493
												259.025	1.01793	258.216	0.95242	244.847	0.93558	273.591	0.93998	257.617	0.96191	273.596	1.00289	263.572	4.71145
												259.263	1.01953	258.455	0.95359	245.08	0.93651	273.844	0.94068	257.857	0.96309	273.852	1.00416	263.824	4.71776
												259.509	1.01998	258.697	0.95448	245.307	0.93768	274.102	0.94195	258.097	0.96386	274.108	1.005	264.069	4.72395
												259.753	1.02146	258.942	0.95568	245.537	0.93859	274.36	0.94288	258.342	0.96517	274.366	1.00616	264.315	4.73021
												259.993	1.0223	259.179	0.9564	245.769	0.93992	274.613	0.9439	258.579	0.96603	274.619	1.0072	264.566	4.73631
												260.238	1.02356	259.425	0.9574	245.994	0.94101	274.874	0.94492	258.824	0.96697	274.877	1.00818	264.808	4.74276
												260.478	1.02473	259.665	0.95886	246.228	0.94208	275.126	0.94605	259.063	0.9683	275.135	1.00947	265.058	4.74915
												260.723	1.02545	259.907	0.9596	246.454	0.94325	275.385	0.94687	259.304	0.96914	275.389	1.01024	265.305	4.75549
												260.966	1.02657	260.152	0.96079	246.685	0.94422	275.642	0.94797	259.549	0.97053	275.649	1.01115	265.55	4.76161
												261.206	1.0272	260.389	0.96183	246.916	0.94547	275.896	0.94911	259.786	0.97126	275.901	1.01221	265.802	4.76781
												261.452	1.02842	260.634	0.96269	247.141	0.94629	276.155	0.95045	260.03	0.97211	276.161	1.01306	266.042	4.77428
												261.692	1.0294	260.875	0.96397	247.374	0.94733	276.408	0.95143	260.271	0.97325	276.417	1.01423	266.294	4.7804
												261.937	1.03032	261.116	0.96475	247.602	0.94852	276.667	0.95215	260.511	0.97406	276.672	1.01497	266.539	4.78673
												262.18	1.0319	261.362	0.96596	247.832	0.94944	276.924	0.95346	260.756	0.9754	276.931	1.01612	266.786	4.79294
												262.42	1.03279	261.599	0.96672	248.064	0.95073	277.178	0.95429	260.993	0.97636	277.184	1.01717	267.036	4.79911
												262.666	1.03391	261.846	0.96793	248.289	0.9515	277.437	0.95575	261.239	0.97744	277.442	1.01796	267.277	4.8054
												262.905	1.03492	262.085	0.96915	248.523	0.9528	277.69	0.95647	261.478	0.97817	277.699	1.01931	267.53	4.81165
												263.151	1.03548	262.327	0.96999	248.749	0.95394	277.948	0.95758	261.718	0.97933	277.953	1.02028	267.775	4.81814
												263.394	1.03708	262.572	0.97121	248.98	0.95471	278.206	0.95877	261.963	0.98063	278.213	1.02132	268.021	4.82506
												263.634	1.03794	262.809	0.97235	249.211	0.9559	278.46	0.95968	262.2	0.98175	278.466	1.022	268.271	4.83142
												263.88	1.03919	263.056	0.97321	249.436	0.95716	278.72	0.96078	262.446	0.98255	278.724	1.02296	268.513	4.83781
												264.12	1.0403	263.295	0.97442	249.67	0.95825	278.971	0.96195	262.685	0.98368	278.982	1.02432	268.763	4.84416
												264.364	1.04107	263.537	0.97533	249.896	0.95959	279.231	0.96298	262.926	0.98433	279.235	1.02525	269.01	4.85058
												264.609	1.04232	263.781	0.97664	250.127	0.96047	279.488	0.9642	263.17	0.98558	279.495	1.02636	269.256	4.85712
												264.848	1.04311	264.019	0.97756	250.359	0.96174	279.742	0.96489	263.407	0.98654	279.747	1.02733	269.508	4.86326
												265.094	1.04455	264.264	0.97867	250.584	0.96273	280.002	0.96617	263.652	0.98758	280.006	1.02819	269.748	4.86967
												265.333	1.04558	264.505	0.97992	250.817	0.9639	280.254	0.96735	263.893	0.98879	280.264	1.02958	270	4.87576
												265.578	1.04625	264.747	0.98084	251.044	0.96505	280.513	0.96803	264.133	0.98956	280.518	1.03035	270.245	4.88188
												265.822	1.04768	264.992	0.98188	251.274	0.96596	280.77	0.96935	264.378	0.9906	280.777	1.03158	270.491	4.8883
												266.061	1.04839	265.229	0.9831	251.507	0.96742	281.024	0.9702	264.614	0.99182	281.03	1.03265	270.742	4.89442
												266.308	1.04982	265.475	0.98401	251.731	0.96855	281.283	0.97125	264.86	0.99245	281.288	1.03352	270.983	4.90108
												266.546	1.05089	265.715	0.98516	251.965	0.96943	281.537	0.97245	265.1	0.99388	281.546	1.03475	271.235	4.90747
												266.792	1.05196	265.958	0.98602	252.192	0.97074	281.795	0.97323	265.341	0.99471	281.799	1.03569	271.48	4.91354
												267.035	1.05329	266.202	0.98724	252.421	0.97144	282.052	0.97452	265.585	0.996	282.058	1.03681	271.726	4.91994
												267.276	1.05402	266.439	0.98839	252.653	0.97295	282.306	0.97528	265.822	0.99679	282.312	1.03796	271.977	4.92655
												267.521	1.05522	266.686	0.98933	252.878	0.97415	282.566	0.97664	266.067	0.99781	282.571	1.03903	272.219	4.93326
												267.762	1.05629	266.925	0.99073	253.112	0.97516	282.817	0.97779	266.306	0.99907	282.827	1.04033	272.469	4.93965
												268.005	1.05726	267.167	0.99149	253.338	0.97641	283.077	0.97843	266.548	0.99988	283.081	1.04103	272.716	4.94599
												268.25	1.05846	267.411	0.99281	253.569	0.9772	283.334	0.97981	266.792	1.00138	283.342	1.04208	272.961	4.95217
												268.489	1.05958	267.649	0.99374	253.8	0.97867	283.588	0.98052	267.029	1.00219	283.593	1.04307	273.213	4.95809
												268.735	1.06058	267.895	0.99477	254.026	0.97974	283.848	0.98176	267.273	1.00337	283.853	1.04371	273.453	4.96429
												268.975	1.0618	268.136	0.99602	254.258	0.98107	284.1	0.98307	267.514	1.00436	284.109	1.0452	273.705	4.97013
												269.22	1.06273	268.376	0.99686	254.487	0.98228	284.359	0.98383	267.754	1.00521	284.363	1.04617	273.95	4.97659
												269.463	1.06419	268.622	0.99822	254.716	0.98329	284.617	0.98519	267.999	1.00638	284.623	1.04726	274.197	4.98286
												269.703	1.06502	268.859	0.99914	254.949	0.98474	284.87	0.98577	268.236	1.00743	284.876	1.04842	274.447	4.98905
												269.949	1.066	269.105	1.00013	255.173	0.9858	285.129	0.98725	268.482	1.00853	285.134	1.04918	274.688	4.99551
												270.188	1.06726	269.345	1.00128	255.407	0.98701	285.382	0.98824	268.721	1.00961	285.392	1.0504	274.941	5.00169
												270.433	1.06831	269.587	1.00245	255.633	0.98794	285.64	0.98926	268.963	1.01054	285.646	1.05117	275.186	5.00801
												270.677	1.06964	269.832	1.00377	255.864	0.98896	285.898	0.99041	269.207	1.01175	285.905	1.05249	275.432	5.01452
												270.917	1.07036	270.069	1.00473	256.096	0.99031	286.152	0.99129	269.443	1.01278	286.158	1.05355	275.682	5.02092
												271.163	1.07151	270.315	1.00569	256.32	0.99159	286.412	0.99222	269.689	1.01371	286.416	1.05442	275.924	5.02701
												271.402	1.07273	270.555	1.00702	256.554	0.99274	286.664	0.99335	269.928	1.01523	286.674	1.05553	276.174	5.03294
												271.647	1.07365	270.797	1.00776	256.781	0.99378	286.924	0.99434	270.169	1.0156	286.927	1.05647	276.421	5.039
												271.891	1.07513	271.042	1.00916	257.012	0.99477	287.18	0.99578	270.413	1.01697	287.188	1.0575	276.666	5.04518
												272.131	1.07594	271.279	1.00994	257.243	0.99599	287.434	0.99666	270.651	1.01781	287.439	1.0588	276.918	5.05133
												272.377	1.07706	271.524	1.01137	257.468	0.99688	287.694	0.99779	270.895	1.01872	287.699	1.05989	277.159	5.05792
												272.616	1.0782	271.765	1.01247	257.701	0.99828	287.947	0.99878	271.136	1.02021	287.955	1.06114	277.41	5.06434
												272.86	1.07938	272.007	1.01345	257.929	0.9998	288.205	0.9996	271.376	1.02098	288.209	1.0621	277.656	5.07078
												273.105	1.08082	272.253	1.01467	258.158	1.00067	288.462	1.00114	271.622	1.02251	288.469	1.06324	277.902	5.07693
												273.344	1.08183	272.489	1.01568	258.39	1.00189	288.716	1.0018	271.858	1.02343	288.723	1.06425	278.152	5.08294
												273.591	1.0832	272.736	1.01676	258.615	1.00309	288.976	1.003	272.103	1.02449	288.98	1.06492	278.394	5.08951
												273.829	1.08436	272.975	1.01807	258.849	1.00419	289.229	1.00386	272.343	1.0261	289.237	1.06622	278.645	5.09606
												274.075	1.08548	273.217	1.01884	259.076	1.00533	289.487	1.00471	272.584	1.02658	289.492	1.06712	278.89	5.10253
												274.318	1.08669	273.462	1.01997	259.306	1.00633	289.745	1.00599	272.828	1.02799	289.751	1.06836	279.137	5.10907
												274.558	1.08747	273.699	1.02127	259.537	1.00771	289.998	1.00707	273.065	1.02911	290.004	1.06931	279.387	5.11543
												274.804	1.08866	273.945	1.02238	259.762	1.00865	290.259	1.00842	273.31	1.03016	290.263	1.07024	279.629	5.12183
												275.044	1.0898	274.185	1.02372	259.996	1.00992	290.51	1.00927	273.55	1.03142	290.52	1.07145	279.88	5.12851
												275.288	1.09073	274.427	1.02464	260.223	1.01145	290.77	1.01033	273.791	1.03229	290.773	1.07235	280.126	5.13556
												275.532	1.0921	274.672	1.02594	260.454	1.01222	291.026	1.01154	274.035	1.03364	291.034	1.07363	280.372	5.14229
												275.772	1.09312	274.909	1.02698	260.685	1.01366	291.281	1.01222	274.272	1.03441	291.285	1.07475	280.623	5.14886
												276.018	1.09445	275.154	1.02799	260.91	1.01472	291.54	1.0137	274.516	1.03562	291.545	1.0756	280.864	5.15535
												276.257	1.09559	275.396	1.02923	261.142	1.01614	291.793	1.01465	274.758	1.0367	291.802	1.07679	281.115	5.16185
												276.502	1.09649	275.636	1.03027	261.371	1.01753	292.051	1.01549	274.998	1.03747	292.056	1.07754	281.361	5.16829
												276.746	1.09793	275.881	1.03182	261.6	1.01853	292.308	1.01687	275.243	1.03857	292.316	1.07889	281.607	5.17492
												276.985	1.09885	276.119	1.03277	261.833	1.01972	292.563	1.01769	275.479	1.03959	292.568	1.07999	281.858	5.18153
												277.233	1.10011	276.365	1.03383	262.057	1.02088	292.822	1.01919	275.725	1.04094	292.827	1.08086	282.1	5.18811
												277.471	1.10148	276.605	1.03511	262.291	1.02192	293.075	1.01989	275.964	1.04187	293.084	1.08214	282.351	5.19447
												277.716	1.10224	276.847	1.03598	262.518	1.02328	293.333	1.0211	276.206	1.04295	293.338	1.08299	282.595	5.20057
												277.96	1.10363	277.092	1.03747	262.748	1.02418	293.591	1.02246	276.45	1.0442	293.597	1.08435	282.843	5.2071
												278.2	1.10462	277.329	1.03844	262.98	1.02567	293.844	1.02339	276.686	1.04514	293.85	1.08551	283.093	5.21362
												278.446	1.10568	277.575	1.03942	263.204	1.02664	294.105	1.02468	276.932	1.04635	294.108	1.08635	283.335	5.2203
												278.685	1.10705	277.815	1.04077	263.439	1.02792	294.357	1.02583	277.171	1.0475	294.366	1.08782	283.585	5.22675
												278.929	1.10801	278.057	1.04151	263.665	1.02931	294.616	1.02698	277.412	1.04852	294.619	1.08886	283.832	5.23285
												279.173	1.10949	278.302	1.04302	263.896	1.03026	294.872	1.02828	277.657	1.04979	294.881	1.08999	284.077	5.23911
												279.414	1.11039	278.54	1.04382	264.127	1.03154	295.127	1.02934	277.894	1.05106	295.132	1.09096	284.328	5.24518
												279.659	1.11171	278.784	1.04504	264.352	1.0327	295.386	1.03051	278.138	1.052	295.392	1.09199	284.57	5.25152
												279.899	1.11278	279.026	1.04644	264.585	1.03399	295.639	1.03153	278.379	1.05344	295.647	1.09349	284.82	5.25777
												280.144	1.11381	279.267	1.04751	264.813	1.03548	295.897	1.03235	278.62	1.05426	295.902	1.09428	285.066	5.26384
												280.388	1.11526	279.512	1.04887	265.042	1.03632	296.154	1.0337	278.864	1.0556	296.161	1.09541	285.312	5.2702
												280.627	1.11632	279.749	1.04986	265.275	1.03782	296.408	1.03469	279.101	1.05639	296.415	1.09642	285.563	5.27634
												280.874	1.11784	279.995	1.0511	265.499	1.03896	296.668	1.03552	279.346	1.05757	296.673	1.09745	285.805	5.28266
												281.112	1.11895	280.235	1.05243	265.733	1.04028	296.921	1.0366	279.586	1.05892	296.93	1.099	286.056	5.28912
												281.358	1.11965	280.477	1.05348	265.96	1.04163	297.179	1.03765	279.827	1.05971	297.184	1.09979	286.301	5.29574
												281.601	1.12092	280.722	1.05461	266.19	1.0426	297.437	1.03903	280.071	1.0612	297.443	1.10135	286.548	5.30248
												281.841	1.12198	280.959	1.05569	266.422	1.04405	297.69	1.03975	280.308	1.06237	297.696	1.10212	286.798	5.3091
												282.086	1.12361	281.205	1.05674	266.646	1.04514	297.951	1.04092	280.553	1.06342	297.955	1.10297	287.04	5.31575
												282.326	1.12458	281.445	1.05817	266.881	1.04618	298.202	1.04218	280.793	1.06461	298.212	1.10416	287.29	5.32201
												282.571	1.12554	281.687	1.05924	267.107	1.04773	298.462	1.0431	281.034	1.06544	298.466	1.10523	287.537	5.32817
												282.815	1.12694	281.932	1.06055	267.338	1.04873	298.719	1.04469	281.278	1.06707	298.726	1.10638	287.782	5.33454
												283.055	1.12838	282.169	1.0617	267.569	1.05025	298.973	1.04538	281.515	1.06807	298.978	1.10748	288.033	5.34093
												283.301	1.12952	282.414	1.06295	267.794	1.05107	299.232	1.04668	281.76	1.06953	299.237	1.10833	288.275	5.34755
												283.54	1.13067	282.656	1.06437	268.027	1.05263	299.485	1.04782	282.001	1.07064	299.495	1.10964	288.526	5.35369
												283.785	1.13163	282.897	1.06529	268.255	1.05415	299.743	1.04867	282.241	1.0717	299.748	1.11061	288.772	5.35979
												284.029	1.13311	283.142	1.06666	268.484	1.0552	300	1.05028	282.485	1.07293	300.008	1.11188	289.019	5.36621
												284.268	1.13439	283.379	1.06766	268.717	1.05666	300.255	1.05097	282.722	1.0742	300.26	1.11323	289.269	5.37261
												284.515	1.13546	283.625	1.06905	268.942	1.05782	300.514	1.05256	282.968	1.07538	300.519	1.11406	289.511	5.37928
												284.753	1.13705	283.865	1.07027	269.176	1.05916	300.767	1.05344	283.208	1.07649	300.776	1.11535	289.762	5.3859
												284.998	1.13776	284.107	1.07127	269.402	1.06042	301.026	1.05422	283.449	1.0777	301.03	1.11635	290.007	5.39209
												285.242	1.13936	284.352	1.07256	269.632	1.06143	301.283	1.05556	283.693	1.07903	301.289	1.11756	290.253	5.39855
												285.483	1.14034	284.59	1.07386	269.864	1.06279	301.536	1.05652	283.93	1.08005	301.543	1.11875	290.503	5.4048
												285.728	1.14226	284.835	1.07531	270.088	1.06394	301.797	1.0579	284.175	1.08103	301.802	1.11964	290.745	5.41144
												285.968	1.14217	285.075	1.07654	270.323	1.06515	302.048	1.05901	284.415	1.08237	302.058	1.12117	290.995	5.41767
												286.212	1.14422	285.317	1.07767	270.549	1.06677	302.308	1.05996	284.655	1.08324	302.312	1.12213	291.242	5.42415
												286.456	1.14514	285.562	1.07906	270.78	1.06778	302.565	1.06123	284.9	1.0846	302.572	1.12348	291.488	5.43077
												286.697	1.14664	285.8	1.08008	271.011	1.06918	302.819	1.06214	285.137	1.08569	302.824	1.12462	291.739	5.43673
												286.941	1.1478	286.045	1.08131	271.236	1.07023	303.078	1.06366	285.382	1.08684	303.084	1.12556	291.98	5.44291
												287.182	1.14917	286.286	1.08267	271.469	1.07149	303.331	1.06465	285.622	1.08814	303.34	1.12701	292.232	5.44897
												287.426	1.1501	286.527	1.08375	271.697	1.07287	303.59	1.06577	285.863	1.08898	303.595	1.12781	292.477	5.45533
												287.67	1.15132	286.772	1.08489	271.926	1.07398	303.847	1.06681	286.107	1.09059	303.854	1.12924	292.723	5.46189
												287.909	1.15287	287.01	1.086	272.159	1.07557	304.101	1.0676	286.344	1.09121	304.107	1.1304	292.974	5.46821
												288.156	1.15361	287.255	1.08709	272.384	1.07667	304.36	1.06905	286.59	1.09272	304.365	1.13124	293.216	5.47451
												288.395	1.15543	287.496	1.08857	272.617	1.07809	304.613	1.07	286.829	1.09387	304.622	1.13269	293.466	5.48059
												288.64	1.15608	287.737	1.08952	272.844	1.07933	304.872	1.07118	287.071	1.09497	304.876	1.13372	293.712	5.48682
												288.884	1.15775	287.982	1.09088	273.075	1.08059	305.129	1.0723	287.314	1.0964	305.136	1.13514	293.958	5.49352
												289.124	1.15885	288.22	1.09214	273.306	1.08208	305.383	1.07359	287.552	1.09768	305.388	1.13608	294.209	5.50021
												289.369	1.16012	288.465	1.09321	273.531	1.08319	305.643	1.07482	287.797	1.09878	305.647	1.13739	294.451	5.50689
												289.609	1.16149	288.706	1.09455	273.765	1.08441	305.894	1.07598	288.036	1.09984	305.905	1.13833	294.701	5.51322
												289.854	1.16241	288.947	1.09553	273.991	1.08598	306.154	1.07694	288.278	1.1007	306.158	1.13937	294.948	5.51953
												290.098	1.16373	289.191	1.09701	274.222	1.08683	306.412	1.07819	288.521	1.10226	306.418	1.14056	295.193	5.52606
												290.338	1.16491	289.429	1.09777	274.453	1.08853	306.666	1.07902	288.759	1.10338	306.67	1.1417	295.445	5.5322
												290.584	1.16617	289.674	1.09918	274.679	1.08945	306.925	1.08053	289.003	1.10454	306.929	1.14273	295.685	5.53868
												290.823	1.16726	289.916	1.10065	274.911	1.09092	307.177	1.08158	289.244	1.10606	307.186	1.1441	295.937	5.54524
												291.068	1.16832	290.157	1.10148	275.139	1.09217	307.436	1.08249	289.484	1.10701	307.441	1.14517	296.182	5.55162
												291.312	1.16994	290.402	1.1028	275.369	1.09356	307.692	1.08377	289.729	1.10844	307.7	1.14634	296.429	5.55793
												291.551	1.1708	290.639	1.1038	275.601	1.09487	307.947	1.08473	289.966	1.10959	307.953	1.14747	296.679	5.56405
												291.798	1.17217	290.886	1.10538	275.826	1.0961	308.206	1.08615	290.212	1.11056	308.211	1.14847	296.921	5.57079
												292.036	1.17327	291.125	1.10666	276.059	1.09745	308.46	1.08728	290.451	1.11215	308.468	1.14995	297.172	5.57738
												292.282	1.17456	291.368	1.10795	276.286	1.0989	308.717	1.08824	290.692	1.11297	308.723	1.15091	297.417	5.58403
												292.525	1.17586	291.612	1.10928	276.516	1.1	308.976	1.08956	290.936	1.11435	308.982	1.15195	297.664	5.59059
												292.766	1.17709	291.849	1.11054	276.748	1.10161	309.228	1.09053	291.173	1.11551	309.235	1.15302	297.914	5.59687
												293.011	1.17821	292.095	1.1115	276.973	1.10281	309.489	1.09178	291.418	1.11662	309.492	1.15424	298.156	5.60317
												293.251	1.17971	292.335	1.11298	277.207	1.10407	309.741	1.09301	291.658	1.11814	309.751	1.15569	298.406	5.60858
												293.495	1.18078	292.577	1.11383	277.433	1.10553	310.001	1.09386	291.899	1.11908	310.004	1.1566	298.653	5.61278
												293.739	1.18199	292.822	1.11529	277.664	1.10664	310.257	1.0953	292.143	1.12061	310.264	1.15808	298.899	5.49393
												293.979	1.18313	293.059	1.11644	277.895	1.10796	310.512	1.09627	292.38	1.12168	310.516	1.15915	299.15	2.73736
												294.225	1.18443	293.305	1.11777	278.121	1.10915	310.77	1.09744	292.625	1.12289	310.776	1.16018	299.387	0.07388
												294.464	1.18576	293.546	1.11923	278.353	1.11059	311.023	1.09867	292.865	1.12437	311.033	1.16154	299.402	-0.03189
												294.709	1.18701	293.787	1.12023	278.581	1.11208	311.282	1.09967	293.106	1.12538	311.287	1.16237
												294.953	1.18846	294.032	1.1217	278.811	1.11326	311.539	1.10113	293.351	1.1268	311.546	1.16374
												295.193	1.18974	294.269	1.1227	279.044	1.11475	311.794	1.10183	293.587	1.12784	311.799	1.16485
												295.439	1.191	294.515	1.1241	279.268	1.11588	312.053	1.10339	293.833	1.12917	312.058	1.16603
												295.678	1.1923	294.756	1.12568	279.501	1.1171	312.305	1.10413	294.073	1.13058	312.314	1.16738
												295.923	1.19334	294.997	1.12702	279.728	1.11865	312.564	1.10555	294.314	1.13165	312.569	1.16834
												296.167	1.19518	295.242	1.12827	279.958	1.11996	312.822	1.10688	294.558	1.1329	312.828	1.16963
												296.407	1.19602	295.48	1.1295	280.19	1.12144	313.075	1.10785	294.795	1.13396	313.081	1.17066
												296.652	1.19748	295.726	1.13066	280.415	1.12289	313.336	1.10879	295.04	1.13517	313.339	1.17192
												296.892	1.19894	295.966	1.13208	280.649	1.12408	313.587	1.11012	295.28	1.13663	313.597	1.17328
												297.137	1.19991	296.207	1.13326	280.875	1.12565	313.847	1.11123	295.521	1.13782	313.85	1.1745
												297.381	1.20132	296.452	1.13481	281.106	1.12662	314.104	1.11261	295.765	1.13904	314.111	1.17555
												297.62	1.20258	296.69	1.13606	281.337	1.12839	314.358	1.11373	296.002	1.14011	314.362	1.17693
												297.866	1.20396	296.934	1.13721	281.562	1.12964	314.617	1.11486	296.246	1.14147	314.623	1.17778
												298.106	1.20516	297.175	1.13868	281.795	1.13091	314.87	1.11633	296.487	1.1427	314.879	1.17922
												298.351	1.20616	297.417	1.13979	282.024	1.13255	315.128	1.11705	296.727	1.14385	315.133	1.18009
												298.594	1.20767	297.663	1.14122	282.253	1.13352	315.385	1.11878	296.973	1.14538	315.392	1.18155
												298.834	1.20855	297.9	1.1425	282.485	1.13512	315.639	1.11948	297.209	1.14654	315.645	1.18267
												299.081	1.21025	298.146	1.1437	282.71	1.13644	315.898	1.12091	297.455	1.14746	315.904	1.18376
												299.319	1.21173	298.386	1.14531	282.944	1.13778	316.152	1.12194	297.694	1.14907	316.16	1.18525
												299.565	1.21283	298.627	1.14631	283.17	1.13921	316.41	1.12303	297.935	1.15006	316.415	1.18614
												299.808	1.21446	298.872	1.14787	283.401	1.14026	316.667	1.12443	298.18	1.15154	316.674	1.18752
												300.049	1.21542	299.109	1.14905	283.632	1.14183	316.922	1.12516	298.416	1.1527	316.927	1.18874
												300.294	1.21683	299.356	1.15032	283.857	1.14301	317.181	1.12675	298.662	1.1541	317.185	1.18989
												300.534	1.21816	299.595	1.15193	284.091	1.14457	317.433	1.12763	298.901	1.15564	317.443	1.19152
												300.778	1.2192	299.837	1.15302	284.317	1.14593	317.693	1.1288	299.142	1.15668	317.697	1.19229
												301.023	1.22068	300.082	1.15456	284.548	1.14714	317.95	1.13035	299.387	1.15819	317.957	1.1937
												301.262	1.22188	300.319	1.15545	284.78	1.14863	318.204	1.13109	299.624	1.15931	318.208	1.19471
												301.508	1.2234	300.565	1.15697	285.005	1.15005	318.463	1.13272	299.868	1.16056	318.468	1.19581
												301.747	1.22444	300.806	1.15843	285.238	1.15154	318.716	1.13401	300.109	1.16194	318.725	1.19745
												301.992	1.2257	301.047	1.15954	285.465	1.15306	318.974	1.13499	300.349	1.16291	318.979	1.19852
												302.236	1.22726	301.293	1.16108	285.695	1.15429	319.232	1.13641	300.594	1.1644	319.239	1.19986
												302.475	1.22859	301.529	1.16226	285.928	1.15592	319.486	1.13765	300.83	1.16558	319.492	1.20098
												302.722	1.22999	301.775	1.16365	286.152	1.15728	319.745	1.13871	301.076	1.16681	319.75	1.20171
												302.96	1.2314	302.016	1.16501	286.386	1.15872	319.998	1.1402	301.316	1.16836	320.007	1.20368
												303.206	1.23249	302.258	1.16627	286.613	1.16001	320.257	1.141	301.557	1.16939	320.261	1.20466
												303.449	1.23391	302.503	1.16776	286.842	1.16138	320.514	1.14242	301.802	1.1709	320.52	1.20603
												303.689	1.23504	302.739	1.16892	287.075	1.16275	320.767	1.14345	302.038	1.1722	320.774	1.20713
												303.935	1.23642	302.986	1.1703	287.299	1.16431	321.027	1.14493	302.283	1.17322	321.032	1.20827
												304.175	1.23763	303.225	1.17184	287.533	1.16573	321.279	1.14622	302.523	1.17471	321.289	1.20972
												304.419	1.23892	303.468	1.17298	287.759	1.16748	321.539	1.14743	302.764	1.17588	321.543	1.21077
												304.664	1.24059	303.712	1.17447	287.99	1.16872	321.796	1.14858	303.008	1.17736	321.803	1.21233
												304.903	1.2417	303.949	1.17568	288.221	1.17018	322.05	1.1494	303.245	1.17831	322.054	1.21368
												305.149	1.24321	304.195	1.17707	288.447	1.17157	322.309	1.15077	303.489	1.17973	322.315	1.21478
												305.389	1.24451	304.436	1.17845	288.679	1.17315	322.562	1.15216	303.73	1.1812	322.571	1.21617
												305.634	1.24557	304.677	1.17955	288.908	1.17478	322.82	1.15298	303.971	1.18243	322.826	1.21723
												305.877	1.24718	304.922	1.18097	289.137	1.17607	323.078	1.15468	304.215	1.18394	323.085	1.21853
												306.116	1.2484	305.159	1.18231	289.37	1.17752	323.332	1.15566	304.452	1.18521	323.338	1.21968
												306.363	1.24978	305.406	1.18372	289.594	1.17883	323.591	1.15684	304.698	1.18631	323.596	1.22046
												306.601	1.25183	305.646	1.18535	289.828	1.18035	323.844	1.15797	304.937	1.18793	323.853	1.22198
												306.847	1.25208	305.888	1.18657	290.054	1.18205	324.102	1.159	305.179	1.18912	324.107	1.22314
												307.091	1.25471	306.133	1.18813	290.285	1.18315	324.36	1.16069	305.423	1.19067	324.366	1.22468
												307.331	1.25497	306.369	1.18927	290.517	1.18497	324.614	1.16125	305.659	1.19198	324.619	1.22585
												307.577	1.25684	306.615	1.19069	290.741	1.18599	324.874	1.16275	305.905	1.1932	324.877	1.22695
												307.816	1.25798	306.855	1.19242	290.975	1.18749	325.125	1.16371	306.144	1.19461	325.135	1.22846
												308.061	1.25935	307.098	1.19344	291.202	1.18908	325.385	1.16511	306.386	1.19568	325.388	1.22951
												308.305	1.2612	307.342	1.19495	291.433	1.19015	325.642	1.16656	306.63	1.19738	325.649	1.23079
												308.545	1.26205	307.58	1.19622	291.664	1.19191	325.896	1.16778	306.867	1.19854	325.9	1.2321
												308.791	1.26366	307.824	1.19777	291.889	1.19327	326.156	1.16894	307.111	1.19997	326.161	1.23334
												309.03	1.2645	308.066	1.1991	292.122	1.19475	326.409	1.17024	307.352	1.20163	326.417	1.23483
												309.274	1.26607	308.307	1.20052	292.35	1.19632	326.667	1.1713	307.592	1.20255	326.672	1.23579
												309.519	1.26708	308.553	1.20214	292.579	1.19757	326.924	1.1728	307.837	1.20402	326.93	1.23738
												309.758	1.26978	308.789	1.2034	292.812	1.19932	327.178	1.17381	308.074	1.20524	327.184	1.23859
												310.005	1.27066	309.035	1.20492	293.036	1.20071	327.437	1.1751	308.319	1.20682	327.442	1.23963
												310.243	1.2721	309.275	1.20642	293.27	1.20219	327.69	1.17636	308.559	1.20824	327.699	1.2413
												310.489	1.27263	309.517	1.20751	293.497	1.20379	327.949	1.17718	308.8	1.20926	327.953	1.24238
												310.732	1.27465	309.762	1.20915	293.727	1.20498	328.206	1.17887	309.044	1.21089	328.213	1.24372
												310.973	1.27625	310	1.21054	293.959	1.20668	328.459	1.17985	309.281	1.21213	328.465	1.24512
												311.217	1.27744	310.246	1.21171	294.183	1.20794	328.72	1.18136	309.527	1.21342	328.724	1.24644
												311.458	1.27853	310.485	1.21331	294.418	1.20929	328.971	1.18245	309.766	1.215	328.982	1.24792
												311.702	1.28008	310.727	1.21433	294.644	1.21116	329.232	1.18372	310.007	1.21624	329.235	1.24892
												311.946	1.28145	310.972	1.2159	294.875	1.21241	329.488	1.18519	310.251	1.21782	329.496	1.25013
												312.186	1.28301	311.209	1.21729	295.106	1.21416	329.743	1.18578	310.488	1.21922	329.746	1.25148
												312.432	1.28426	311.455	1.21883	295.331	1.21546	330.002	1.1877	310.733	1.22045	330.007	1.2526
												312.671	1.28581	311.696	1.22037	295.564	1.21688	330.255	1.18912	310.974	1.22192	330.263	1.2541
												312.916	1.28671	311.937	1.22153	295.792	1.21844	330.513	1.1902	311.214	1.22328	330.517	1.25519
												313.16	1.28885	312.182	1.22318	296.022	1.2198	330.77	1.19192	311.459	1.22472	330.777	1.25674
												313.399	1.28935	312.419	1.22444	296.254	1.22149	331.024	1.19284	311.695	1.22597	331.03	1.25795
												313.647	1.29157	312.665	1.22593	296.478	1.22263	331.284	1.19441	311.941	1.22718	331.288	1.25916
												313.885	1.29238	312.906	1.22759	296.712	1.22426	331.536	1.19545	312.181	1.22876	331.546	1.26067
												314.131	1.29397	313.148	1.22863	296.939	1.22593	331.795	1.19671	312.422	1.22996	331.8	1.2618
												314.374	1.29568	313.392	1.2302	297.168	1.22737	332.052	1.19829	312.666	1.2316	332.059	1.26318
												314.614	1.29686	313.629	1.23154	297.401	1.2291	332.306	1.19941	312.902	1.2329	332.312	1.2646
												314.86	1.29883	313.875	1.2329	297.625	1.23041	332.567	1.20047	313.148	1.23419	332.569	1.26567
												315.099	1.29944	314.115	1.23434	297.86	1.23189	332.818	1.20175	313.387	1.23581	332.828	1.26726
												315.343	1.30119	314.358	1.23572	298.086	1.23351	333.077	1.20294	313.629	1.23694	333.081	1.26861
												315.587	1.30277	314.602	1.23739	298.317	1.23497	333.334	1.20426	313.873	1.23869	333.342	1.27003
												315.828	1.30373	314.84	1.23857	298.548	1.23674	333.588	1.20551	314.111	1.23977	333.593	1.27141
												316.073	1.30573	315.084	1.24003	298.773	1.23825	333.847	1.20681	314.354	1.24127	333.853	1.27249
												316.313	1.30681	315.326	1.24156	299.006	1.23991	334.101	1.20802	314.596	1.24284	334.109	1.27406
												316.558	1.30869	315.567	1.24268	299.234	1.24148	334.359	1.20903	314.835	1.24386	334.364	1.2753
												316.802	1.30968	315.812	1.24429	299.463	1.24265	334.616	1.21064	315.08	1.2456	334.623	1.27697
												317.041	1.31179	316.05	1.24564	299.696	1.24425	334.87	1.21177	315.317	1.24684	334.876	1.27852
												317.288	1.31239	316.295	1.24693	299.92	1.24578	335.129	1.2134	315.563	1.24828	335.134	1.27949
												317.526	1.31475	316.536	1.24821	300.154	1.24723	335.382	1.21447	315.803	1.24981	335.392	1.28104
												317.772	1.31538	316.777	1.2496	300.381	1.24878	335.641	1.2158	316.043	1.2511	335.646	1.28222
												318.015	1.31736	317.022	1.25099	300.611	1.25013	335.898	1.21733	316.288	1.25261	335.905	1.28374
												318.255	1.31875	317.259	1.25196	300.843	1.25224	336.152	1.21835	316.524	1.25404	336.158	1.28495
												318.5	1.31999	317.505	1.25283	301.068	1.25343	336.413	1.21959	316.77	1.25537	336.417	1.28651
												318.741	1.32214	317.745	1.25369	301.302	1.25462	336.664	1.22093	317.009	1.25702	336.674	1.28794
												318.985	1.32305	317.987	1.2537	301.528	1.25641	336.924	1.22222	317.25	1.25821	336.927	1.28907
												319.229	1.32513	318.232	1.25376	301.758	1.25755	337.18	1.22359	317.495	1.25987	337.188	1.2905
												319.469	1.32594	318.47	1.2522	301.99	1.25903	337.435	1.22492	317.732	1.26112	337.439	1.29201
												319.714	1.32765	318.715	1.21129	302.215	1.26006	337.694	1.22607	317.976	1.26273	337.699	1.29305
												319.954	1.32914	318.956	0.53239	302.448	1.26117	337.947	1.22787	318.217	1.26416	337.956	1.29443
												320.199	1.33042	319.17	-0.02014	302.676	1.2623	338.205	1.22851	318.457	1.26536	338.21	1.29555
												320.443	1.33242	319.174	-0.03793	302.906	1.26268	338.462	1.2302	318.702	1.2669	338.469	1.2972
												320.682	1.33356			303.138	1.26314	338.716	1.2312	318.938	1.26843	338.722	1.29868
												320.929	1.33528			303.363	1.26245	338.975	1.23296	319.184	1.26996	338.98	1.29965
												321.168	1.33647			303.597	1.25672	339.229	1.2341	319.424	1.27144	339.237	1.30127
												321.413	1.33817			303.823	0.85879	339.487	1.23527	319.665	1.27282	339.492	1.30246
												321.657	1.3398			304.053	0.00851	339.744	1.23676	319.909	1.27437	339.751	1.30382
												321.897	1.34176			304.102	-0.08949	339.998	1.2382	320.146	1.27591	340.004	1.3052
												322.142	1.34383			304.102	-0.0554	340.258	1.23968	320.391	1.27741	340.263	1.30656
												322.382	1.34302					340.51	1.24089	320.631	1.27921	340.52	1.3082
												322.626	1.34577					340.77	1.2421	320.872	1.28057	340.773	1.30934
												322.87	1.347					341.026	1.24348	321.116	1.28213	341.034	1.31097
												323.11	1.34845					341.28	1.24453	321.354	1.28337	341.286	1.31224
												323.355	1.35048					341.54	1.246	321.598	1.28472	341.545	1.3135
												323.596	1.35126					341.793	1.24743	321.839	1.2864	341.802	1.31491
												323.84	1.35298					342.052	1.24858	322.079	1.28764	342.056	1.31631
												324.084	1.35454					342.308	1.24981	322.323	1.28948	342.315	1.31773
												324.324	1.35643					342.563	1.25109	322.56	1.29073	342.568	1.31902
												324.57	1.35738					342.822	1.25265	322.806	1.29205	342.827	1.3204
												324.809	1.35931					343.075	1.25402	323.046	1.29375	343.084	1.32206
												325.055	1.36042					343.333	1.25491	323.287	1.2952	343.338	1.32315
												325.298	1.36236					343.591	1.25676	323.531	1.29684	343.597	1.32469
												325.538	1.36341					343.845	1.25729	323.767	1.29828	343.85	1.326
												325.783	1.36471					344.105	1.25892	324.013	1.29988	344.108	1.32728
												326.023	1.36648					344.356	1.26022	324.252	1.30158	344.366	1.32913
												326.268	1.36773					344.616	1.26163	324.494	1.30263	344.62	1.33048
												326.512	1.36984					344.873	1.26334	324.738	1.30432	344.88	1.33192
												326.752	1.37112					345.127	1.26429	324.975	1.30571	345.132	1.33337
												326.998	1.37297					345.386	1.26586	325.219	1.30735	345.391	1.33458
												327.237	1.37455					345.639	1.2671	325.46	1.30901	345.648	1.33638
												327.481	1.37534					345.898	1.26842	325.7	1.31043	345.902	1.33751
												327.725	1.37738					346.154	1.26975	325.945	1.312	346.161	1.33925
												327.965	1.37864					346.409	1.27092	326.182	1.31346	346.414	1.34064
												328.212	1.38036					346.667	1.27264	326.428	1.31496	346.673	1.3418
												328.45	1.38203					346.921	1.27381	326.667	1.31652	346.929	1.34344
												328.696	1.38332					347.179	1.27509	326.908	1.31799	347.184	1.34467
												328.939	1.38495					347.437	1.2766	327.153	1.31967	347.443	1.34629
												329.18	1.38639					347.69	1.2782	327.389	1.32115	347.697	1.34748
												329.425	1.38791					347.951	1.27929	327.634	1.32266	347.954	1.34887
												329.665	1.38979					348.203	1.28078	327.874	1.32452	348.212	1.35052
												329.909	1.39103					348.462	1.28192	328.115	1.32567	348.466	1.35164
												330.153	1.39279					348.718	1.28386	328.359	1.32751	348.726	1.35338
												330.393	1.39388					348.973	1.28472	328.596	1.32889	348.978	1.35477
												330.639	1.39577					349.232	1.28621	328.841	1.33048	349.237	1.35609
												330.878	1.39718					349.485	1.28759	329.082	1.33215	349.494	1.35745
												331.123	1.39873					349.744	1.28857	329.322	1.33354	349.749	1.35864
												331.367	1.4005					350	1.29009	329.567	1.33527	350.007	1.36017
												331.606	1.4021					350.255	1.29126	329.803	1.33665	350.26	1.36164
												331.853	1.40365					350.515	1.29292	330.049	1.33821	350.519	1.36272
												332.091	1.40542					350.767	1.29416	330.289	1.33993	350.776	1.36445
												332.337	1.40663					351.025	1.29548	330.53	1.34122	351.03	1.36564
												332.581	1.40826					351.283	1.29718	330.774	1.34296	351.289	1.36727
												332.821	1.40955					351.536	1.29831	331.011	1.34457	351.543	1.36856
												333.067	1.41137					351.797	1.2998	331.256	1.34609	351.8	1.36988
												333.306	1.41314					352.048	1.30106	331.496	1.34781	352.058	1.3713
												333.551	1.4144					352.308	1.30226	331.737	1.34928	352.312	1.37268
												333.795	1.41631					352.565	1.30379	331.981	1.35102	352.573	1.37436
												334.034	1.41757					352.819	1.30499	332.218	1.35274	352.824	1.37581
												334.28	1.41957					353.079	1.30651	332.462	1.3542	353.084	1.37697
												334.52	1.42161					353.332	1.30805	332.703	1.35593	353.34	1.37878
												334.765	1.42262					353.59	1.30889	332.944	1.35725	353.595	1.37992
												335.008	1.42482					353.847	1.3107	333.189	1.35912	353.854	1.38171
												335.248	1.42586					354.101	1.31187	333.425	1.36051	354.107	1.38332
												335.494	1.4277					354.36	1.31363	333.671	1.36203	354.365	1.38439
												335.733	1.42921					354.613	1.31486	333.91	1.36376	354.622	1.38617
												335.978	1.43086					354.871	1.31628	334.151	1.36538	354.876	1.3875
												336.222	1.43262					355.129	1.31771	334.396	1.36697	355.136	1.38917
												336.463	1.4341					355.383	1.31915	334.632	1.36858	355.389	1.39059
												336.708	1.43604					355.643	1.3206	334.878	1.37024	355.646	1.39208
												336.948	1.43752					355.895	1.32226	335.117	1.37193	355.905	1.39366
												337.192	1.43896					356.154	1.32337	335.358	1.37349	356.158	1.39479
												337.436	1.44062					356.411	1.32489	335.602	1.3753	356.418	1.39638
												337.676	1.44206					356.665	1.32631	335.84	1.37681	356.67	1.39779
												337.922	1.44387					356.925	1.32772	336.084	1.37839	356.929	1.39917
												338.161	1.44535					357.177	1.32962	336.325	1.38028	357.187	1.40092
												338.405	1.44691					357.436	1.33054	336.565	1.3817	357.441	1.40219
												338.65	1.44872					357.693	1.33235	336.81	1.38354	357.7	1.40362
												338.889	1.45035					357.947	1.33359	337.046	1.38517	357.953	1.40517
												339.136	1.45204					358.206	1.33502	337.292	1.38667	358.211	1.40622
												339.374	1.45385					358.459	1.3364	337.532	1.38857	358.469	1.40795
												339.62	1.45511					358.718	1.33755	337.773	1.38993	358.723	1.40922
												339.863	1.457					358.975	1.3394	338.018	1.39181	358.982	1.41082
												340.103	1.45848					359.229	1.34047	338.254	1.39315	359.235	1.41238
												340.349	1.4603					359.489	1.3422	338.5	1.3949	359.494	1.41353
												340.589	1.46206					359.74	1.34325	338.739	1.39651	359.75	1.41538
												340.833	1.46336					360.001	1.34454	338.98	1.39838	360.004	1.41666
												341.077	1.46513					360.257	1.34633	339.224	1.39965	360.264	1.41828
												341.317	1.46685					360.512	1.34758	339.461	1.40137	360.516	1.41976
												341.563	1.46852					360.77	1.34914	339.705	1.4029	360.776	1.42101
												341.803	1.46993					361.024	1.35065	339.947	1.40488	361.033	1.42283
												342.048	1.47144					361.282	1.35176	340.187	1.40619	361.287	1.42425
												342.291	1.47341					361.539	1.35321	340.432	1.40841	361.546	1.42602
												342.531	1.4752					361.793	1.35454	340.668	1.40984	361.799	1.42729
												342.777	1.47663					362.053	1.35636	340.914	1.41136	362.057	1.42857
												343.015	1.47858					362.306	1.35752	341.154	1.41306	362.315	1.43018
												343.261	1.48009					362.563	1.35905	341.395	1.41461	362.569	1.43144
												343.505	1.48191					362.822	1.36074	341.639	1.41661	362.828	1.43313
												343.745	1.48335					363.075	1.36185	341.875	1.41817	363.081	1.43464
												343.99	1.48537					363.336	1.36325	342.121	1.41999	363.339	1.43615
												344.23	1.48697					363.587	1.36475	342.36	1.42183	363.597	1.43783
												344.475	1.48844					363.847	1.36605	342.602	1.4232	363.85	1.43917
												344.719	1.49035					364.103	1.36773	342.846	1.42508	364.111	1.44078
												344.958	1.49185					364.357	1.36925	343.083	1.42659	364.362	1.44242
												345.205	1.4938					364.617	1.37055	343.327	1.42841	364.622	1.44352
												345.444	1.49524					364.87	1.37228	343.568	1.43016	364.878	1.44532
												345.688	1.49672					365.128	1.37355	343.808	1.43188	365.133	1.44674
												345.933	1.49882					365.385	1.37533	344.054	1.43364	365.393	1.44851
												346.172	1.50038					365.639	1.37646	344.29	1.43531	365.646	1.45017
												346.419	1.50203					365.899	1.37819	344.536	1.43666	365.904	1.45143
												346.657	1.50414					366.152	1.3793	344.775	1.43881	366.16	1.4531
												346.903	1.50573					366.41	1.38081	345.016	1.44021	366.415	1.45437
												347.146	1.50785					366.668	1.38237	345.261	1.44241	366.674	1.4561
												347.387	1.5088					366.921	1.38347	345.497	1.44387	366.927	1.45782
												347.631	1.51103					367.182	1.38502	345.743	1.44543	367.186	1.45913
												347.872	1.51293					367.433	1.38665	345.982	1.44738	367.443	1.46072
												348.116	1.51412					367.693	1.38813	346.223	1.44896	367.696	1.46237
												348.36	1.51638					367.949	1.38985	346.467	1.45097	367.957	1.46384
												348.6	1.51786					368.204	1.39111	346.704	1.45258	368.208	1.46555
												348.846	1.51984					368.463	1.39263	346.949	1.45433	368.468	1.46698
												349.085	1.52137					368.716	1.39433	347.19	1.45626	368.725	1.46881
												349.33	1.52314					368.974	1.39536	347.43	1.45776	368.979	1.46997
												349.573	1.5251					369.232	1.39731	347.675	1.45975	369.238	1.47181
												349.813	1.5266					369.486	1.39844	347.912	1.4613	369.492	1.47347
												350.061	1.5282					369.745	1.40024	348.157	1.46314	369.75	1.47482
												350.299	1.52971					369.998	1.40169	348.397	1.46496	370.007	1.47673
												350.544	1.53187					370.256	1.40321	348.638	1.46664	370.261	1.47807
												350.788	1.53325					370.514	1.40484	348.882	1.46853	370.52	1.47968
												351.028	1.5355					370.767	1.4063	349.118	1.47037	370.773	1.48112
												351.273	1.53698					371.028	1.40743	349.364	1.47184	371.031	1.48288
												351.513	1.53895					371.279	1.40916	349.604	1.47404	371.289	1.48468
												351.758	1.54046					371.539	1.41048	349.844	1.4755	371.543	1.48602
												352.001	1.5426					371.795	1.41225	350.089	1.47752	371.804	1.4877
												352.242	1.54408					372.05	1.41335	350.326	1.47917	372.055	1.48937
												352.487	1.54593					372.309	1.41526	350.57	1.48115	372.314	1.49081
												352.727	1.54779					372.562	1.41671	350.811	1.4831	372.57	1.4926
												352.971	1.54932					372.821	1.41812	351.051	1.48488	372.825	1.49411
												353.215	1.55155					373.078	1.41964	351.296	1.48694	373.084	1.4959
												353.455	1.55302					373.332	1.42103	351.533	1.48864	373.338	1.49747
												353.702	1.55479					373.591	1.42262	351.779	1.49039	373.596	1.49876
												353.94	1.5568					373.844	1.42417	352.018	1.49232	373.853	1.50056
												354.186	1.55831					374.103	1.42573	352.259	1.49415	374.107	1.50213
												354.429	1.56071					374.359	1.42735	352.504	1.49599	374.366	1.50383
												354.669	1.56207					374.613	1.42859	352.74	1.49789	374.619	1.50539
												354.914	1.56423					374.874	1.42987	352.986	1.49953	374.878	1.50689
												355.155	1.56601					375.125	1.43167	353.225	1.50175	375.135	1.50861
												355.399	1.56788					375.385	1.43305	353.466	1.50332	375.389	1.50995
												355.642	1.56992					375.642	1.43493	353.71	1.50524	375.65	1.51178
												355.883	1.57153					375.896	1.43645	353.948	1.50727	375.901	1.51351
												356.128	1.57339					376.155	1.43802	354.192	1.50897	376.161	1.5151
												356.368	1.57546					376.408	1.4395	354.433	1.51095	376.417	1.51709
												356.613	1.57713					376.667	1.44071	354.674	1.51254	376.672	1.51853
												356.857	1.57908					376.923	1.44257	354.918	1.51474	376.931	1.52029
												357.096	1.5807					377.178	1.44359	355.155	1.5164	377.184	1.52202
												357.343	1.58262					377.437	1.44544	355.401	1.51813	377.442	1.52336
												357.582	1.58454					377.69	1.4469	355.64	1.52025	377.699	1.52539
												357.827	1.58647					377.948	1.44835	355.881	1.52198	377.954	1.52687
												358.071	1.5885					378.206	1.44998	356.126	1.52402	378.213	1.52874
												358.31	1.59028					378.459	1.45146	356.362	1.52589	378.466	1.53011
												358.556	1.59224					378.72	1.45298	356.607	1.52777	378.724	1.53177
												358.796	1.59426					378.972	1.45465	356.847	1.52981	378.982	1.53381
												359.04	1.59596					379.231	1.45596	357.088	1.53138	379.235	1.53525
												359.284	1.59833					379.488	1.45755	357.332	1.53366	379.495	1.53697
												359.524	1.59985					379.742	1.45894	357.57	1.53525	379.747	1.53877
												359.769	1.60192					380.001	1.46085	357.814	1.53716	380.006	1.54014
												360.01	1.60369					380.255	1.46215	358.054	1.53901	380.263	1.54198
												360.254	1.60549					380.513	1.46356	358.295	1.54071	380.517	1.54349
												360.498	1.60749					380.77	1.4653	358.539	1.54285	380.776	1.54543
												360.737	1.60941					381.024	1.46668	358.776	1.54475	381.03	1.54698
												360.984	1.6114					381.283	1.46834	359.022	1.54653	381.288	1.54861
												361.223	1.61343					381.536	1.46984	359.262	1.54842	381.545	1.55043
												361.468	1.615					381.795	1.47131	359.503	1.55063	381.799	1.55191
												361.712	1.61739					382.052	1.47306	359.747	1.5525	382.059	1.55369
												361.952	1.61895					382.306	1.47482	359.984	1.55419	382.312	1.55536
												362.197	1.62095					382.566	1.47592	360.229	1.55629	382.57	1.55707
												362.437	1.62286					382.818	1.47797	360.468	1.5582	382.828	1.55904
												362.682	1.62438					383.077	1.47929	360.71	1.55991	383.082	1.56037
												362.926	1.62655					383.335	1.48137	360.954	1.56171	383.341	1.56207
												363.166	1.62848					383.589	1.48247	361.191	1.56378	383.593	1.56373
												363.411	1.63067					383.848	1.48449	361.435	1.56561	383.853	1.56533
												363.651	1.63269					384.1	1.48577	361.676	1.56756	384.11	1.5674
												363.896	1.6345					384.359	1.4872	361.917	1.56907	384.364	1.5691
												364.139	1.63668					384.615	1.48929	362.162	1.57129	384.623	1.57095
												364.379	1.63819					384.87	1.49046	362.398	1.57303	384.876	1.57277
												364.626	1.64033					385.129	1.49239	362.644	1.57525	385.134	1.57431
												364.864	1.64226					385.383	1.49362	362.883	1.57745	385.391	1.57622
												365.11	1.64426					385.64	1.49518	363.125	1.57905	385.646	1.57787
												365.353	1.64628					385.899	1.49687	363.369	1.58103	385.904	1.57966
												365.593	1.64818					386.152	1.49819	363.605	1.58328	386.158	1.58134
												365.839	1.65009					386.412	1.49975	363.851	1.58512	386.416	1.58309
												366.079	1.65191					386.664	1.50148	364.09	1.5873	386.674	1.58499
												366.323	1.65381					386.924	1.50296	364.331	1.58906	386.928	1.58651
												366.567	1.65604					387.18	1.50481	364.575	1.59118	387.187	1.58844
												366.806	1.65785					387.435	1.50603	364.813	1.59305	387.439	1.59016
												367.053	1.65986					387.694	1.50791	365.057	1.59497	387.698	1.59177
												367.292	1.66169					387.947	1.50954	365.298	1.59719	387.956	1.59378
												367.537	1.66381					388.205	1.51089	365.538	1.59884	388.21	1.59526
												367.781	1.66606					388.462	1.51318	365.783	1.60096	388.469	1.59725
												368.021	1.66797					388.716	1.514	366.02	1.60312	388.722	1.59896
												368.267	1.67004					388.976	1.51567	366.265	1.60507	388.981	1.6004
												368.505	1.67209					389.228	1.51684	366.505	1.60718	389.237	1.60229
												368.751	1.67403					389.487	1.51879	366.746	1.60885	389.492	1.60384
												368.995	1.67629					389.745	1.5207	366.991	1.61103	389.751	1.60576
												369.235	1.67803					389.998	1.52193	367.227	1.61306	390.004	1.60751
												369.48	1.68035					390.259	1.52346	367.472	1.61491	390.262	1.60923
												369.72	1.68261					390.51	1.52506	367.712	1.61699	390.52	1.61104
												369.965	1.68435					390.77	1.52664	367.953	1.61883	390.773	1.61251
												370.208	1.68663					391.027	1.52835	368.197	1.62127	391.034	1.6144
												370.448	1.68838					391.281	1.52975	368.434	1.62325	391.285	1.61645
												370.693	1.69037					391.54	1.53141	368.678	1.62513	391.545	1.6181
												370.934	1.69267					391.793	1.53291	368.919	1.62723	391.802	1.61998
												371.179	1.69432					392.051	1.53439	369.16	1.62913	392.056	1.62137
												371.422	1.69649					392.308	1.53602	369.405	1.6314	392.315	1.6234
												371.662	1.69831					392.562	1.53768	369.641	1.63337	392.568	1.62514
												371.908	1.7004					392.822	1.53959	369.887	1.63528	392.827	1.62675
												372.147	1.7027					393.075	1.54129	370.127	1.63763	393.084	1.62871
												372.392	1.70456					393.333	1.54282	370.367	1.63942	393.337	1.63024
												372.636	1.70691					393.591	1.54451	370.612	1.64166	393.597	1.6323
												372.877	1.70883					393.844	1.54603	370.848	1.64383	393.85	1.63408
												373.122	1.71087					394.105	1.54784	371.094	1.64558	394.108	1.63601
												373.362	1.71279					394.356	1.54969	371.334	1.64785	394.366	1.63804
												373.606	1.71467					394.616	1.55104	371.574	1.64971	394.62	1.63965
												373.85	1.7172					394.873	1.55294	371.819	1.65181	394.88	1.64149
												374.09	1.71918					395.127	1.5546	372.056	1.65393	395.131	1.64323
												374.336	1.72123					395.386	1.55619	372.3	1.65607	395.391	1.64507
												374.575	1.72332					395.639	1.55796	372.541	1.65834	395.648	1.64704
												374.819	1.72529					395.897	1.55914	372.781	1.66011	395.902	1.64869
												375.064	1.72735					396.155	1.5613	373.027	1.66239	396.162	1.65046
												375.303	1.72923					396.408	1.56266	373.263	1.66436	396.414	1.65228
												375.55	1.73111					396.668	1.5642	373.508	1.66642	396.673	1.6537
												375.788	1.73327					396.921	1.5659	373.748	1.66863	396.93	1.65582
												376.034	1.73499					397.18	1.56749	373.99	1.67072	397.184	1.65741
												376.277	1.73744					397.436	1.56915	374.234	1.6729	397.443	1.65931
												376.517	1.73911					397.69	1.57053	374.471	1.67497	397.696	1.66124
												376.763	1.74109					397.951	1.5723	374.715	1.67688	397.955	1.66287
												377.003	1.74269					398.202	1.5741	374.955	1.67916	398.212	1.66505
												377.247	1.74328					398.462	1.5752	375.196	1.68112	398.466	1.66647
												377.492	1.59581					398.719	1.57754	375.44	1.6834	398.726	1.66822
												377.731	0.45916					398.973	1.57895	375.677	1.68535	398.977	1.67029
												377.907	-0.01921					399.232	1.58052	375.921	1.68736	399.238	1.67194
												377.908	-0.02624					399.485	1.58243	376.163	1.68959	399.494	1.67382
																		399.744	1.58408	376.403	1.69173	399.748	1.67537
																		400.001	1.58553	376.647	1.69388	400.008	1.67744
																		400.255	1.58696	376.884	1.69593	400.261	1.67918
																		400.514	1.58896	377.13	1.69795	400.519	1.68067
																		400.767	1.5907	377.37	1.70035	400.777	1.68261
																		401.025	1.59194	377.611	1.70231	401.03	1.68433
																		401.283	1.59406	377.855	1.70472	401.29	1.68641
																		401.536	1.59524	378.091	1.70658	401.543	1.688
																		401.797	1.59732	378.337	1.70855	401.8	1.68973
																		402.048	1.59871	378.576	1.71111	402.058	1.69188
																		402.308	1.60044	378.818	1.71289	402.312	1.69342
																		402.564	1.6025	379.062	1.71549	402.573	1.69522
																		402.819	1.60366	379.299	1.71736	402.824	1.69696
																		403.079	1.60542	379.543	1.71956	403.083	1.69841
																		403.332	1.60709	379.784	1.7218	403.34	1.70068
																		403.59	1.60883	380.024	1.72395	403.595	1.70208
																		403.847	1.61087	380.27	1.72634	403.854	1.704
																		404.101	1.61223	380.506	1.72845	404.107	1.70581
																		404.36	1.61425	380.752	1.73053	404.365	1.70733
																		404.613	1.61576	380.991	1.73256	404.623	1.70933
																		404.872	1.61726	381.232	1.73472	404.876	1.71071
																		405.129	1.61912	381.476	1.73703	405.136	1.71265
																		405.383	1.62076	381.714	1.73922	405.389	1.7145
																		405.643	1.6223	381.959	1.74142	405.647	1.71634
																		405.894	1.62409	382.198	1.74391	405.905	1.71824
																		406.154	1.62536	382.439	1.74583	406.158	1.71975
																		406.411	1.6274	382.683	1.74813	406.418	1.72124
																		406.665	1.62882	382.92	1.75024	406.67	1.72314
																		406.924	1.63071	383.165	1.75235	406.929	1.7247
																		407.178	1.63236	383.406	1.75476	407.187	1.72652
																		407.436	1.63379	383.646	1.75698	407.44	1.72791
																		407.693	1.63572	383.891	1.75915	407.7	1.72999
																		407.947	1.63696	384.127	1.76122	407.953	1.73162
																		408.207	1.63856	384.373	1.76353	408.211	1.73317
																		408.459	1.64006	384.613	1.76608	408.468	1.73502
																		408.718	1.64152	384.854	1.76787	408.723	1.73634
																		408.975	1.64341	385.099	1.77017	408.982	1.73801
																		409.228	1.64462	385.334	1.77242	409.235	1.73953
																		409.49	1.64628	385.58	1.77448	409.493	1.74102
																		409.741	1.64781	385.82	1.77704	409.751	1.74277
																		410.001	1.6489	386.061	1.77904	410.004	1.74414
																		410.257	1.65081	386.305	1.78142	410.265	1.74554
																		410.511	1.65184	386.543	1.7837	410.516	1.74712
																		410.77	1.65342	386.787	1.78579	410.776	1.7486
																		411.024	1.65491	387.028	1.78827	411.032	1.75034
																		411.283	1.6564	387.268	1.79034	411.287	1.75164
																		411.539	1.6582	387.513	1.79285	411.545	1.75321
																		411.793	1.65934	387.75	1.79497	411.799	1.75483
																		412.052	1.66099	387.995	1.79738	412.058	1.75609
																		412.305	1.66238	388.235	1.79984	412.315	1.75782
																		412.564	1.66365	388.476	1.80196	412.569	1.759
																		412.821	1.66517	388.72	1.80422	412.828	1.76073
																		413.074	1.6663	388.957	1.80645	413.081	1.76219
																		413.336	1.66777	389.202	1.80867	413.339	1.7636
																		413.587	1.66942	389.441	1.81128	413.597	1.76544
																		413.847	1.67037	389.683	1.81317	413.85	1.76684
																		414.103	1.67194	389.926	1.81574	414.111	1.76828
																		414.358	1.67335	390.164	1.8179	414.362	1.76976
																		414.617	1.67458	390.408	1.82029	414.622	1.77109
																		414.869	1.67605	390.649	1.82274	414.879	1.77284
																		415.128	1.67699	390.89	1.82486	415.133	1.77402
																		415.385	1.67873	391.134	1.82736	415.392	1.77559
																		415.639	1.67963	391.371	1.82976	415.645	1.77688
																		415.898	1.68132	391.616	1.83204	415.903	1.77838
																		416.152	1.68259	391.856	1.83456	416.16	1.78013
																		416.41	1.68414	392.097	1.83661	416.415	1.78142
																		416.668	1.68474	392.342	1.83914	416.674	1.78316
																		416.921	1.68642	392.578	1.84144	416.927	1.78466
																		417.182	1.68777	392.823	1.8437	417.186	1.78622
																		417.434	1.68938	393.063	1.84625	417.443	1.78787
																		417.693	1.69037	393.304	1.84851	417.696	1.7892
																		417.949	1.69211	393.548	1.85108	417.957	1.7909
																		418.204	1.69345	393.785	1.85336	418.209	1.79262
																		418.463	1.69497	394.03	1.8554	418.468	1.79394
																		418.716	1.69639	394.271	1.85771	418.725	1.79552
																		418.974	1.69748	394.511	1.85998	418.979	1.7969
																		419.231	1.69943	394.756	1.86248	419.238	1.79875
																		419.486	1.70085	394.992	1.86479	419.491	1.8005
																		419.744	1.70209	395.238	1.86715	419.75	1.80174
																		419.998	1.70338	395.478	1.86955	420.007	1.80324
																		420.256	1.70488	395.719	1.87178	420.261	1.80449
																		420.514	1.70651	395.963	1.87422	420.52	1.80631
																		420.768	1.70776	396.2	1.87642	420.773	1.80755
																		421.028	1.70938	396.445	1.87874	421.032	1.80908
																		421.279	1.71059	396.685	1.88142	421.289	1.81068
																		421.539	1.71175	396.926	1.88361	421.543	1.81197
																		421.796	1.71392	397.17	1.88617	421.803	1.81336
																		422.05	1.71578	397.407	1.88858	422.055	1.81497
																		422.309	1.71706	397.651	1.89099	422.315	1.8164
																		422.562	1.71785	397.892	1.89335	422.571	1.81814
																		422.821	1.71902	398.133	1.8956	422.826	1.81924
																		423.077	1.72103	398.378	1.89813	423.084	1.82089
																		423.332	1.72217	398.614	1.90054	423.337	1.82237
																		423.59	1.72407	398.86	1.90286	423.596	1.82356
																		423.844	1.72492	399.099	1.90527	423.853	1.82541
																		424.102	1.72638	399.341	1.90743	424.107	1.82674
																		424.36	1.72814	399.585	1.90994	424.366	1.82835
																		424.613	1.72935	399.822	1.91237	424.619	1.82977
																		424.874	1.73048	400.067	1.9147	424.877	1.83096
																		425.125	1.73152	400.307	1.9172	425.135	1.83268
																		425.385	1.73309	400.547	1.91957	425.389	1.83409
																		425.642	1.73487	400.791	1.922	425.649	1.83585
																		425.897	1.7359	401.029	1.92457	425.901	1.83728
																		426.155	1.73753	401.274	1.92707	426.16	1.83857
																		426.408	1.7387	401.514	1.92978	426.417	1.84025
																		426.667	1.74003	401.754	1.93193	426.672	1.84153
																		426.924	1.74137	401.999	1.93486	426.93	1.84329
																		427.178	1.743	402.236	1.9369	427.184	1.84476
																		427.437	1.74427	402.481	1.93931	427.442	1.84631
																		427.69	1.7452	402.721	1.94166	427.699	1.84812
																		427.948	1.74676	402.962	1.94344	427.954	1.84955
																		428.206	1.74807	403.207	1.80346	428.213	1.85128
																		428.459	1.74924	403.443	0.56302	428.466	1.85267
																		428.721	1.75052	403.619	-0.01536	428.724	1.85441
																		428.972	1.7521	403.62	-0.02305	428.982	1.85625
																		429.231	1.75327			429.235	1.85784
																		429.488	1.75506			429.496	1.85941
																		429.743	1.75615			429.747	1.861
																		430.002	1.75753			430.007	1.86251
																		430.254	1.75883			430.263	1.86436
																		430.513	1.75967			430.518	1.86582
																		430.769	1.7617			430.777	1.86781
																		431.024	1.76261			431.03	1.86978
																		431.283	1.76419			431.288	1.87136
																		431.536	1.76511			431.545	1.87326
																		431.794	1.76663			431.799	1.87475
																		432.052	1.76815			432.059	1.87662
																		432.306	1.76917			432.312	1.87851
																		432.566	1.77079			432.57	1.88027
																		432.818	1.772			432.828	1.88231
																		433.077	1.7733			433.082	1.88392
																		433.334	1.7749			433.342	1.88584
																		433.589	1.77601			433.593	1.88752
																		433.847	1.77742			433.853	1.88923
																		434.1	1.77875			434.11	1.89133
																		434.359	1.78004			434.364	1.89298
																		434.616	1.78146			434.623	1.89489
																		434.87	1.78279			434.876	1.89656
																		435.129	1.78424			435.134	1.89814
																		435.383	1.78577			435.392	1.89963
																		435.642	1.78689			435.646	1.64186
																		435.898	1.78849			435.905	0.36726
																		436.152	1.78966			436.061	0.00896
																		436.412	1.79101			436.062	0.0072
																		436.664	1.79235
																		436.924	1.79334
																		437.18	1.7949
																		437.434	1.79601
																		437.694	1.79752
																		437.946	1.79891
																		438.205	1.79982
																		438.463	1.80135
																		438.716	1.80238
																		438.976	1.80382
																		439.229	1.80491
																		439.487	1.80616
																		439.745	1.80744
																		439.998	1.80847
																		440.259	1.80956
																		440.51	1.81083
																		440.769	1.812
																		441.026	1.81334
																		441.281	1.81433
																		441.54	1.81571
																		441.793	1.81678
																		442.051	1.81763
																		442.309	1.81877
																		442.563	1.81968
																		442.822	1.82089
																		443.075	1.82204
																		443.333	1.82314
																		443.591	1.82402
																		443.844	1.82502
																		444.105	1.82613
																		444.356	1.82714
																		444.616	1.82782
																		444.873	1.82881
																		445.127	1.82884
																		445.386	1.7595
																		445.639	0.70087
																		445.853	-0.06426
																		445.855	-0.08491
[truncated: 137 more columns]

## Sheet: Figure 2
	Panel A								Panel B								Panel C																Source data for panels A and B												Source data for panel C
		100/0		85/15		70/30				100/0		85/15		70/30			Week 0			Week 1			Week 2			Week 3			Week 4					Week 0	Week 1	Week 2	Week 3	Week 4	Week 5	Week 6	Week 7	Week 9	Week 11		Week 0
	Time (week)	Weight (%)	SD (%)	Weight (%)	SD (%)	Weight (%)	SD (%)		Time (week)	Water uptake (%)	SD (%)	Water uptake (%)	SD (%)	Water uptake (%)	SD (%)		Distance	F	SD	Distance	F	SD	Distance	F	SD	Distance	F	SD	Distance	F	SD			m of dry stents (mg)											Stent 1
	0	100	0.92035	100	5.7021	100	3.3291		1	3.38426	0.18051	2.8372	0.19332	4.0448	0.19271		mm	N	N	mm	N	N	mm	N	N	mm	N	N	mm	N	N		100/0												Compression 1			Compression 2
	1	99.2133	0.03152	99.2394	0.16672	98.3176	0.41167		2	6.61528	0.72709	7.07746	0.50547	6.2513	0.96667		0	0	0	0	0	0	0	0	0	0	0	0	0	0	0		Stent 1	202.8	201.3	200.2	199.4	137.7	/						Force	Distance	Time	Force	Distance
	2	98.8898	0.18131	97.8808	0.30211	97.1521	0.76891		3	16.6781	1.45408	18.4947	1.72896	10.4031	2.28011		0.0038	0.02893	0.000855188	0.0038	0.02396	0.00191	0.0038	0.02475	0.00217	0.0038	0.02789	0.00237	0.0038	0.02407	0.00299		Stent 2	199	197.4	197.3	194.8	/							N	mm	sec	N	mm
	3	98.0262	0.2001	96.3309	0.58182	94.8888	1.5323		4	84.2411	/	30.7818	4.12573	13.5477	4.4844		0.00761	0.02337	0.00302	0.00761	0.01851	0.00332	0.00761	0.01932	0.00131	0.00761	0.02393	0.00325	0.00761	0.0215	0.00556		Stent 3	198.8	197.2	196.5	194.7	/
	4	67.8994	/	91.1112	0.96864	90.6528	1.95472		5			39.2058	1.85995	19.5209	1.82615		0.01141	0.02782	0.0029	0.01141	0.02306	0.00406	0.01141	0.02183	0.00222	0.01141	0.02818	0.00126	0.01141	0.02782	0.0068		Stent 4	200.4	198.8	198.1	196.3	/							0.0393563	0	0	0.0671371	0
	5			81.4581	1.52383	85.8527	2.32852		6			41.126	2.0911	27.2797	1.24816		0.01522	0.02998	0.00429	0.01522	0.02334	0.00422	0.01522	0.02259	0.00182	0.01522	0.02892	0.00339	0.01522	0.0279	0.00874		85/15												0.0219932	0	0.005	0.07987	0
	6			68.2541	0.4682	81.0567	2.43564		7			50.0046	6.17998	36.8283	1.76234		0.01902	0.03103	0.00536	0.01902	0.0265	0.00449	0.01902	0.02599	0.00162	0.01902	0.03179	0.00475	0.01902	0.0364	0.00841		Stent 1	198.4	197.1	195	192.2	182.8	165	136.1	120.7	105.6	/		0.0486165	0.001	0.01	0.104178	0.001
	7			61.1294	0.71133	76.8282	2.53539		9			84.547	8.21928	53.1491	4.67599		0.02282	0.03551	0.00567	0.02282	0.02907	0.00615	0.02282	0.0283	0.00246	0.02282	0.03774	0.00443	0.02282	0.03783	0.01093		Stent 2	187.2	185.7	182.7	180.3	170.3	150.2	127.3	116	103.1	/		0.0578768	0.002	0.015	0.106493	0.002
	9			53.5267	1.42167	68.8857	2.60197		11					79.6801	3.41064		0.02663	0.0372	0.00757	0.02663	0.03146	0.0063	0.02663	0.02939	0.00245	0.02663	0.04053	0.00516	0.02663	0.04301	0.01394		Stent 3	197.4	196.2	193.3	190.7	180.6	162.5	135.6	121.2	103.2	/		0.0497741	0.003	0.02	0.0983906	0.003
	11					62.4204	2.66639										0.03043	0.04253	0.00621	0.03043	0.03597	0.0071	0.03043	0.03346	0.00381	0.03043	0.04175	0.00803	0.03043	0.04919	0.0168		Stent 4	214.7	212.6	209.8	205.1	192.9	172	145.4	129.5	/			0.0532467	0.004	0.025	0.104178	0.004
																	0.03423	0.04529	0.0079	0.03423	0.03746	0.00891	0.03423	0.03775	0.00563	0.03423	0.04638	0.00867	0.03423	0.05422	0.01768		70/30												0.0555618	0.005	0.03	0.107651	0.005
																	0.03804	0.04825	0.00699	0.03804	0.0427	0.00684	0.03804	0.03782	0.00466	0.03804	0.04691	0.01078	0.03804	0.05908	0.01925		Stent 1	226.8	221.9	218.8	212.3	201.9	190.6	179.5	169.7	151.1	136.5		0.0509316	0.006	0.035	0.101863	0.006
																	0.04184	0.05345	0.00984	0.04184	0.04554	0.00935	0.04184	0.04419	0.00564	0.04184	0.05419	0.01081	0.04184	0.06379	0.02276		Stent 2	217.2	213.1	209.7	203.2	193.2	182	171.2	162.1	145.6	130.9		0.0544042	0.007	0.04	0.0972331	0.007
																	0.04565	0.05518	0.01007	0.04565	0.04886	0.00802	0.04565	0.04582	0.00666	0.04565	0.05738	0.01056	0.04565	0.06974	0.02298		Stent 3	216.2	213.4	210.9	207.3	198.7	188.1	178.6	168.7	150.6	137.5		0.0555618	0.008	0.045	0.0972331	0.008
																	0.04945	0.06024	0.00908	0.04945	0.05307	0.00868	0.04945	0.04984	0.00754	0.04945	0.06082	0.01405	0.04945	0.07414	0.02525		Stent 4	209.2	206.3	205.1	201.9	194	185.3	175	167	151.1	137.3		0.0578768	0.009	0.05	0.100706	0.009
																	0.05325	0.06299	0.00984	0.05325	0.05438	0.01259	0.05325	0.05264	0.00806	0.05325	0.06633	0.01365	0.05325	0.08058	0.02722														0.0590344	0.01	0.055	0.100706	0.01
																	0.05706	0.06745	0.00998	0.05706	0.06124	0.01188	0.05706	0.05505	0.00869	0.05706	0.06765	0.01546	0.05706	0.08383	0.02919		Source data for panel B												0.0555618	0.011	0.06	0.101863	0.011
																	0.06086	0.07031	0.01114	0.06086	0.0636	0.01234	0.06086	0.05836	0.00875	0.06086	0.07333	0.01657	0.06086	0.09079	0.03027			Week 1	Week 2	Week 3	Week 4	Week 5	Week 6	Week 7	Week 9	Week 11			0.0613495	0.012	0.065	0.103021	0.012
																	0.06466	0.07404	0.01018	0.06466	0.06688	0.01174	0.06466	0.06114	0.01036	0.06466	0.07746	0.01924	0.06466	0.0968	0.03177			m of wet stents (mg)											0.0613495	0.013	0.07	0.0995482	0.013
																	0.06847	0.07782	0.01052	0.06847	0.07027	0.01489	0.06847	0.06502	0.01002	0.06847	0.08037	0.0215	0.06847	0.10051	0.03329		100/0												0.0590344	0.014	0.075	0.100706	0.014
																	0.07227	0.08193	0.01258	0.07227	0.07347	0.01535	0.07227	0.0682	0.01077	0.07227	0.08581	0.02038	0.07227	0.10788	0.03494		Stent 1	208.2	212.8	229.1	253.7	140.4							0.0590344	0.015	0.08	0.101863	0.015
																	0.07608	0.08427	0.01231	0.07608	0.07688	0.01493	0.07608	0.07223	0.01028	0.07608	0.08676	0.02172	0.07608	0.1111	0.03641		Stent 2	203.8	209.2	226.7	265.1	/							0.0601919	0.016	0.085	0.0995482	0.016
																	0.07988	0.08981	0.015	0.07988	0.08031	0.01783	0.07988	0.07478	0.01103	0.07988	0.09324	0.02337	0.07988	0.11841	0.03815		Stent 3	203.6	209.2	227.9	253.7	/							0.0601919	0.017	0.09	0.105336	0.017
																	0.08368	0.09293	0.01399	0.08368	0.08494	0.01928	0.08368	0.07789	0.01371	0.08368	0.09524	0.02413	0.08368	0.12338	0.04054		Stent 4	206	213.3	232.4	267.6	/							0.0648221	0.018	0.095	0.105336	0.018
																	0.08749	0.09586	0.01446	0.08749	0.08854	0.01842	0.08749	0.0809	0.0148	0.08749	0.10146	0.02649	0.08749	0.12805	0.04282		85/15												0.0671371	0.019	0.1	0.100706	0.019
																	0.09129	0.09924	0.01482	0.09129	0.09009	0.01953	0.09129	0.08406	0.01403	0.09129	0.10476	0.02793	0.09129	0.13428	0.04388		Stent 1	202.4	207.6	224.6	239.2	230.4	195.9	179.6	190.8	251.5			0.0671371	0.02	0.105	0.100706	0.02
																	0.0951	0.10273	0.01559	0.0951	0.09507	0.0202	0.0951	0.08797	0.01658	0.0951	0.10818	0.02777	0.0951	0.14088	0.04711		Stent 2	191	196.2	212	214.9	206.1	180.1	184.2	200	258.8			0.0659796	0.021	0.11	0.103021	0.021
																	0.0989	0.10678	0.01535	0.0989	0.09752	0.02092	0.0989	0.09123	0.01832	0.0989	0.11233	0.03014	0.0989	0.14598	0.04709		Stent 3	201.5	206.6	226.4	234.6	224.9	189.5	179.5	184.7	245.4			0.0671371	0.022	0.115	0.104178	0.022
																	0.1027	0.11225	0.01602	0.1027	0.10249	0.02126	0.1027	0.09481	0.01681	0.1027	0.11569	0.02982	0.1027	0.1509	0.04972		Stent 4	219.2	225.7	247.8	262.7	243.5	202.6	186.9	176.5				0.0659796	0.023	0.12	0.106493	0.023
																	0.10651	0.11479	0.01645	0.10651	0.10547	0.02214	0.10651	0.09692	0.01889	0.10651	0.12052	0.03328	0.10651	0.15763	0.05066		70/30												0.0706097	0.024	0.125	0.109966	0.024
																	0.11031	0.11963	0.01634	0.11031	0.10856	0.02296	0.11031	0.10138	0.01854	0.11031	0.12245	0.03368	0.11031	0.16128	0.05215		Stent 1	231.5	234.1	238.3	236.4	230.6	230.6	234.6	236.8	248			0.0706097	0.025	0.13	0.109966	0.025
																	0.11411	0.1212	0.01871	0.11411	0.11194	0.02438	0.11411	0.10472	0.02047	0.11411	0.12744	0.03559	0.11411	0.16797	0.05441		Stent 2	221.6	224.7	228.6	225.8	220.6	218	221.4	223.8	235.5			0.0706097	0.026	0.135	0.107651	0.026
																	0.11792	0.12547	0.01845	0.11792	0.11565	0.02556	0.11792	0.10584	0.01944	0.11792	0.1321	0.03854	0.11792	0.17529	0.05566		Stent 3	221.7	222.8	224.5	213.7	221.6	228.2	232.9	234.6	250.7			0.0763974	0.027	0.14	0.107651	0.027
																	0.12172	0.12919	0.01765	0.12172	0.1176	0.02546	0.12172	0.11026	0.02129	0.12172	0.13546	0.03752	0.12172	0.17764	0.05681		Stent 4	214.5	215.8	219.2	218.6	218.8	219.7	224.5	221.2	240			0.077555	0.028	0.145	0.109966	0.028
																	0.12553	0.1322	0.01885	0.12553	0.12464	0.02615	0.12553	0.11334	0.02073	0.12553	0.13994	0.03935	0.12553	0.18512	0.05919														0.077555	0.029	0.15	0.111124	0.029
																	0.12933	0.13637	0.02077	0.12933	0.12694	0.02683	0.12933	0.11626	0.02208	0.12933	0.14375	0.0404	0.12933	0.18944	0.05963														0.0763974	0.03	0.155	0.111124	0.03
																	0.13313	0.14069	0.01993	0.13313	0.1291	0.02769	0.13313	0.11995	0.02607	0.13313	0.14979	0.03982	0.13313	0.19556	0.06206														0.0752399	0.031	0.16	0.112281	0.031
																	0.13694	0.14446	0.02129	0.13694	0.13321	0.02828	0.13694	0.12113	0.0234	0.13694	0.15327	0.04155	0.13694	0.2001	0.06391														0.07987	0.032	0.165	0.112281	0.032
																	0.14074	0.14857	0.02234	0.14074	0.13523	0.02886	0.14074	0.12553	0.02513	0.14074	0.15543	0.04201	0.14074	0.206	0.06652														0.0821851	0.033	0.17	0.114596	0.033
																	0.14454	0.15187	0.0194	0.14454	0.14014	0.02955	0.14454	0.12809	0.02528	0.14454	0.15813	0.04424	0.14454	0.21237	0.06764														0.0845002	0.034	0.175	0.115754	0.034
																	0.14835	0.15427	0.02207	0.14835	0.1427	0.03067	0.14835	0.13256	0.0261	0.14835	0.16195	0.04503	0.14835	0.21548	0.06845														0.0833427	0.035	0.18	0.113439	0.035
																	0.15215	0.15963	0.02164	0.15215	0.14577	0.03061	0.15215	0.13498	0.02471	0.15215	0.16724	0.04632	0.15215	0.22257	0.07038														0.0833427	0.036	0.185	0.118069	0.036
																	0.15596	0.16262	0.02161	0.15596	0.1499	0.03269	0.15596	0.13785	0.0261	0.15596	0.16831	0.04705	0.15596	0.22663	0.07175														0.07987	0.037	0.19	0.116911	0.037
																	0.15976	0.16547	0.02432	0.15976	0.15261	0.03246	0.15976	0.14088	0.02886	0.15976	0.17529	0.04859	0.15976	0.23414	0.07435														0.0810276	0.038	0.195	0.115754	0.038
																	0.16356	0.16973	0.02442	0.16356	0.15773	0.0323	0.16356	0.14446	0.02929	0.16356	0.1779	0.05019	0.16356	0.23819	0.0769														0.0856577	0.039	0.2	0.115754	0.039
																	0.16737	0.17316	0.0245	0.16737	0.15958	0.03457	0.16737	0.14704	0.03107	0.16737	0.18284	0.05245	0.16737	0.24178	0.07572														0.0891303	0.04	0.205	0.119226	0.04
																	0.17117	0.17782	0.0235	0.17117	0.16261	0.03468	0.17117	0.1502	0.03041	0.17117	0.18697	0.05115	0.17117	0.24894	0.07935														0.0914454	0.041	0.21	0.120384	0.041
																	0.17497	0.18016	0.02407	0.17497	0.1682	0.03528	0.17497	0.15277	0.03108	0.17497	0.18996	0.0538	0.17497	0.25386	0.08043														0.0926029	0.042	0.215	0.121541	0.042
																	0.17878	0.18424	0.02491	0.17878	0.16797	0.03776	0.17878	0.15592	0.0312	0.17878	0.19485	0.05623	0.17878	0.25939	0.08139														0.0937605	0.043	0.22	0.123856	0.043
																	0.18258	0.18738	0.02558	0.18258	0.17374	0.03713	0.18258	0.15867	0.03203	0.18258	0.19577	0.05518	0.18258	0.26438	0.08371														0.0960756	0.044	0.225	0.125014	0.044
																	0.18639	0.19064	0.02587	0.18639	0.17553	0.03754	0.18639	0.16296	0.03306	0.18639	0.2015	0.05817	0.18639	0.27058	0.08508														0.0937605	0.045	0.23	0.126172	0.045
																	0.19019	0.19525	0.02639	0.19019	0.17776	0.03636	0.19019	0.16419	0.03316	0.19019	0.20293	0.05955	0.19019	0.27408	0.08469														0.0937605	0.046	0.235	0.127329	0.046
																	0.19399	0.19665	0.02825	0.19399	0.18339	0.03842	0.19399	0.16682	0.034	0.19399	0.209	0.05957	0.19399	0.27973	0.08846														0.0937605	0.047	0.24	0.125014	0.047
																	0.1978	0.20205	0.02811	0.1978	0.18421	0.03846	0.1978	0.16979	0.0342	0.1978	0.21118	0.06221	0.1978	0.28586	0.09073														0.0995482	0.048	0.245	0.127329	0.048
																	0.2016	0.20625	0.02741	0.2016	0.19035	0.04007	0.2016	0.17409	0.0358	0.2016	0.21597	0.05998	0.2016	0.29072	0.09083														0.100706	0.049	0.25	0.129644	0.049
																	0.20541	0.20828	0.02795	0.20541	0.19161	0.0405	0.20541	0.17688	0.03639	0.20541	0.21904	0.06321	0.20541	0.29765	0.09142														0.101863	0.05	0.255	0.129644	0.05
																	0.20921	0.21208	0.02882	0.20921	0.19493	0.04071	0.20921	0.17957	0.03561	0.20921	0.22253	0.06412	0.20921	0.30014	0.09392														0.100706	0.051	0.26	0.126172	0.051
																	0.21301	0.21468	0.02933	0.21301	0.19797	0.04403	0.21301	0.18238	0.0382	0.21301	0.22535	0.06536	0.21301	0.30664	0.09545														0.101863	0.052	0.265	0.125014	0.052
																	0.21682	0.21912	0.02856	0.21682	0.20217	0.04328	0.21682	0.18555	0.03924	0.21682	0.22896	0.06654	0.21682	0.31032	0.09722														0.100706	0.053	0.27	0.126172	0.053
																	0.22062	0.2225	0.0293	0.22062	0.20491	0.04275	0.22062	0.18829	0.03833	0.22062	0.23366	0.06658	0.22062	0.31541	0.09803														0.100706	0.054	0.275	0.126172	0.054
																	0.22442	0.22614	0.03042	0.22442	0.20932	0.04336	0.22442	0.19085	0.03853	0.22442	0.23497	0.06834	0.22442	0.32107	0.0998														0.100706	0.055	0.28	0.129644	0.055
																	0.22823	0.23085	0.02998	0.22823	0.20987	0.04496	0.22823	0.1942	0.03982	0.22823	0.23979	0.07014	0.22823	0.32535	0.10104														0.100706	0.056	0.285	0.131959	0.056
																	0.23203	0.2346	0.03203	0.23203	0.21579	0.04579	0.23203	0.19831	0.04153	0.23203	0.24238	0.06921	0.23203	0.33214	0.10156														0.104178	0.057	0.29	0.131959	0.057
																	0.23584	0.23786	0.03108	0.23584	0.21605	0.04639	0.23584	0.19851	0.04153	0.23584	0.24583	0.07241	0.23584	0.33582	0.10339														0.105336	0.058	0.295	0.134274	0.058
																	0.23964	0.23906	0.03244	0.23964	0.21931	0.0467	0.23964	0.20296	0.04332	0.23964	0.25097	0.071	0.23964	0.34118	0.10533														0.111124	0.059	0.3	0.135432	0.059
																	0.24344	0.24258	0.03144	0.24344	0.22336	0.04821	0.24344	0.20444	0.04088	0.24344	0.25304	0.0741	0.24344	0.3461	0.10889														0.114596	0.06	0.305	0.133117	0.06
																	0.24725	0.24562	0.03303	0.24725	0.22552	0.04818	0.24725	0.20903	0.04403	0.24725	0.25877	0.07551	0.24725	0.3488	0.10942														0.109966	0.061	0.31	0.131959	0.061
																	0.25105	0.24957	0.03232	0.25105	0.22885	0.04769	0.25105	0.20935	0.04331	0.25105	0.25955	0.07676	0.25105	0.35659	0.10978														0.108808	0.062	0.315	0.134274	0.062
																	0.25485	0.25241	0.03218	0.25485	0.23309	0.04966	0.25485	0.21451	0.04458	0.25485	0.26219	0.07705	0.25485	0.35871	0.11292														0.107651	0.063	0.32	0.136589	0.063
																	0.25866	0.25641	0.03394	0.25866	0.2357	0.04986	0.25866	0.21542	0.04542	0.25866	0.26647	0.07837	0.25866	0.36534	0.11251														0.109966	0.064	0.325	0.136589	0.064
																	0.26246	0.25864	0.03447	0.26246	0.24009	0.05169	0.26246	0.22	0.04599	0.26246	0.26945	0.07743	0.26246	0.37047	0.11414														0.112281	0.065	0.33	0.136589	0.065
																	0.26627	0.26115	0.03501	0.26627	0.24119	0.05298	0.26627	0.22306	0.04612	0.26627	0.27378	0.08107	0.26627	0.3752	0.11668														0.118069	0.066	0.335	0.136589	0.066
																	0.27007	0.26673	0.03368	0.27007	0.24447	0.05282	0.27007	0.22462	0.04773	0.27007	0.27559	0.08136	0.27007	0.37891	0.11783														0.116911	0.067	0.34	0.135432	0.067
																	0.27387	0.26893	0.03447	0.27387	0.24882	0.05366	0.27387	0.22842	0.05064	0.27387	0.28007	0.08077	0.27387	0.38334	0.11964														0.120384	0.068	0.345	0.138904	0.068
																	0.27768	0.274	0.03442	0.27768	0.2512	0.05481	0.27768	0.22963	0.04852	0.27768	0.28278	0.08336	0.27768	0.38782	0.11965														0.120384	0.069	0.35	0.136589	0.069
																	0.28148	0.27529	0.03793	0.28148	0.25341	0.05551	0.28148	0.23331	0.04874	0.28148	0.28609	0.08372	0.28148	0.39291	0.12149														0.119226	0.07	0.355	0.137747	0.07
																	0.28529	0.27882	0.03585	0.28529	0.25719	0.05418	0.28529	0.23573	0.05054	0.28529	0.29128	0.08426	0.28529	0.39884	0.1228														0.121541	0.071	0.36	0.140062	0.071
																	0.28909	0.28289	0.03837	0.28909	0.26002	0.05621	0.28909	0.23933	0.05018	0.28909	0.29264	0.08637	0.28909	0.40312	0.12648														0.126172	0.072	0.365	0.144692	0.072
																	0.29289	0.28527	0.0359	0.29289	0.26219	0.05488	0.29289	0.24076	0.05297	0.29289	0.29741	0.08757	0.29289	0.40627	0.12909														0.128487	0.073	0.37	0.143535	0.073
																	0.2967	0.28845	0.03689	0.2967	0.26649	0.05635	0.2967	0.24286	0.05017	0.2967	0.29918	0.08892	0.2967	0.41044	0.1293														0.125014	0.074	0.375	0.140062	0.074
																	0.3005	0.2917	0.03781	0.3005	0.26977	0.0584	0.3005	0.24688	0.05173	0.3005	0.30282	0.08995	0.3005	0.41581	0.13112														0.126172	0.075	0.38	0.141219	0.075
																	0.3043	0.29556	0.03716	0.3043	0.27105	0.05801	0.3043	0.24803	0.05226	0.3043	0.30521	0.09072	0.3043	0.41973	0.13081														0.125014	0.076	0.385	0.142377	0.076
																	0.30811	0.2986	0.0394	0.30811	0.2746	0.05894	0.30811	0.25268	0.05261	0.30811	0.30991	0.09204	0.30811	0.42489	0.13455														0.127329	0.077	0.39	0.144692	0.077
																	0.31191	0.30116	0.03901	0.31191	0.27692	0.05723	0.31191	0.25429	0.05316	0.31191	0.31187	0.09238	0.31191	0.4297	0.13516														0.133117	0.078	0.395	0.143535	0.078
																	0.31572	0.30442	0.04006	0.31572	0.28014	0.06013	0.31572	0.25598	0.05336	0.31572	0.31432	0.09379	0.31572	0.43402	0.13607														0.129644	0.079	0.4	0.143535	0.079
																	0.31952	0.30659	0.04112	0.31952	0.28469	0.05951	0.31952	0.26021	0.05479	0.31952	0.32027	0.0944	0.31952	0.43919	0.1395														0.134274	0.08	0.405	0.144692	0.08
																	0.32332	0.3112	0.04015	0.32332	0.2862	0.06117	0.32332	0.26219	0.0545	0.32332	0.31867	0.09516	0.32332	0.44294	0.13814														0.133117	0.081	0.41	0.143535	0.081
																	0.32713	0.31336	0.04105	0.32713	0.28839	0.06172	0.32713	0.26427	0.05661	0.32713	0.32442	0.09532	0.32713	0.4477	0.14125														0.133117	0.082	0.415	0.147007	0.082
																	0.33093	0.31648	0.04059	0.33093	0.2926	0.0632	0.33093	0.26598	0.05612	0.33093	0.32672	0.09569	0.33093	0.45203	0.14134														0.135432	0.083	0.42	0.15048	0.083
																	0.33473	0.31904	0.0424	0.33473	0.29335	0.06456	0.33473	0.26998	0.05589	0.33473	0.33017	0.09885	0.33473	0.45501	0.14525														0.137747	0.084	0.425	0.152795	0.084
																	0.33854	0.32393	0.04313	0.33854	0.29579	0.06322	0.33854	0.27098	0.05534	0.33854	0.33252	0.09922	0.33854	0.46079	0.14559														0.137747	0.085	0.43	0.152795	0.085
																	0.34234	0.32673	0.04269	0.34234	0.3004	0.06578	0.34234	0.27404	0.05711	0.34234	0.33565	0.09867	0.34234	0.46362	0.14577														0.137747	0.086	0.435	0.149322	0.086
																	0.34615	0.32891	0.04273	0.34615	0.30251	0.06431	0.34615	0.27665	0.05743	0.34615	0.33997	0.10062	0.34615	0.46851	0.14693														0.135432	0.087	0.44	0.151637	0.087
																	0.34995	0.33464	0.04337	0.34995	0.3054	0.06564	0.34995	0.27881	0.05871	0.34995	0.34168	0.10364	0.34995	0.4723	0.14789														0.138904	0.088	0.445	0.151637	0.088
																	0.35375	0.33591	0.04238	0.35375	0.30958	0.06669	0.35375	0.28264	0.06034	0.35375	0.34646	0.10364	0.35375	0.47749	0.14966														0.140062	0.089	0.45	0.152795	0.089
																	0.35756	0.33833	0.04498	0.35756	0.31081	0.06611	0.35756	0.28478	0.0588	0.35756	0.34805	0.10352	0.35756	0.48028	0.15056														0.140062	0.09	0.455	0.153952	0.09
																	0.36136	0.33965	0.0462	0.36136	0.31237	0.0672	0.36136	0.28692	0.06152	0.36136	0.35083	0.10563	0.36136	0.48537	0.15174														0.141219	0.091	0.46	0.156267	0.091
																	0.36517	0.34419	0.04407	0.36517	0.31665	0.0673	0.36517	0.28981	0.05929	0.36517	0.35543	0.10713	0.36517	0.49097	0.15381														0.143535	0.092	0.465	0.156267	0.092
																	0.36897	0.3477	0.04552	0.36897	0.31907	0.06818	0.36897	0.29232	0.05976	0.36897	0.35696	0.10811	0.36897	0.49198	0.15621														0.144692	0.093	0.47	0.156267	0.093
																	0.37277	0.35034	0.04552	0.37277	0.32144	0.06974	0.37277	0.29471	0.06365	0.37277	0.36032	0.1093	0.37277	0.50064	0.15718														0.144692	0.094	0.475	0.156267	0.094
																	0.37658	0.35409	0.0468	0.37658	0.325	0.06926	0.37658	0.29738	0.06197	0.37658	0.36314	0.10927	0.37658	0.50264	0.15921														0.142377	0.095	0.48	0.160898	0.095
																	0.38038	0.3577	0.04699	0.38038	0.32741	0.06949	0.38038	0.29992	0.06224	0.38038	0.36617	0.11097	0.38038	0.50692	0.15919														0.143535	0.096	0.485	0.162055	0.096
																	0.38418	0.36072	0.04722	0.38418	0.32969	0.07004	0.38418	0.30201	0.06273	0.38418	0.36858	0.11118	0.38418	0.51042	0.16143														0.151637	0.097	0.49	0.160898	0.097
																	0.38799	0.36217	0.049	0.38799	0.33283	0.07036	0.38799	0.30442	0.0656	0.38799	0.37168	0.11209	0.38799	0.51393	0.16149														0.148165	0.098	0.495	0.162055	0.098
																	0.39179	0.36632	0.04758	0.39179	0.33487	0.07061	0.39179	0.30622	0.06349	0.39179	0.3748	0.11311	0.39179	0.51905	0.16363														0.148165	0.099	0.5	0.160898	0.099
																	0.3956	0.36737	0.04945	0.3956	0.33756	0.07325	0.3956	0.31114	0.06534	0.3956	0.37658	0.11463	0.3956	0.52233	0.16574														0.149322	0.1	0.505	0.162055	0.1
																	0.3994	0.37216	0.05046	0.3994	0.34039	0.07305	0.3994	0.31169	0.06569	0.3994	0.38047	0.11483	0.3994	0.52753	0.16665														0.15048	0.101	0.51	0.165528	0.101
																	0.4032	0.37391	0.04935	0.4032	0.34299	0.07474	0.4032	0.31272	0.0663	0.4032	0.38032	0.11494	0.4032	0.52957	0.16824														0.157425	0.102	0.515	0.167843	0.102
																	0.40701	0.37736	0.05005	0.40701	0.34547	0.07392	0.40701	0.31716	0.06457	0.40701	0.38726	0.1182	0.40701	0.53466	0.17039														0.156267	0.103	0.52	0.167843	0.103
																	0.41081	0.38088	0.04917	0.41081	0.34859	0.07353	0.41081	0.31739	0.06676	0.41081	0.38789	0.11756	0.41081	0.53974	0.17158														0.157425	0.104	0.525	0.167843	0.104
																	0.41461	0.3833	0.05183	0.41461	0.35118	0.07449	0.41461	0.32119	0.06808	0.41461	0.3918	0.11941	0.41461	0.54232	0.17174														0.158583	0.105	0.53	0.169	0.105
																	0.41842	0.38706	0.0514	0.41842	0.3532	0.07582	0.41842	0.3238	0.0677	0.41842	0.39366	0.12095	0.41842	0.54669	0.17331														0.157425	0.106	0.535	0.167843	0.106
																	0.42222	0.3894	0.05214	0.42222	0.35748	0.07516	0.42222	0.3245	0.06808	0.42222	0.39579	0.11981	0.42222	0.54933	0.17546														0.157425	0.107	0.54	0.165528	0.107
																	0.42603	0.39291	0.05304	0.42603	0.35795	0.07554	0.42603	0.32786	0.07073	0.42603	0.40079	0.12073	0.42603	0.55499	0.17605														0.158583	0.108	0.545	0.16437	0.108
																	0.42983	0.39413	0.05348	0.42983	0.36151	0.07706	0.42983	0.32953	0.07056	0.42983	0.39976	0.12219	0.42983	0.55758	0.17631														0.163213	0.109	0.55	0.167843	0.109
																	0.43363	0.3972	0.05571	0.43363	0.3636	0.07814	0.43363	0.33283	0.0708	0.43363	0.40602	0.12227	0.43363	0.56174	0.17752														0.160898	0.11	0.555	0.167843	0.11
																	0.43744	0.40257	0.05486	0.43744	0.36667	0.07739	0.43744	0.3363	0.07015	0.43744	0.40804	0.12416	0.43744	0.56627	0.17996														0.163213	0.111	0.56	0.171315	0.111
																	0.44124	0.40332	0.0525	0.44124	0.36886	0.07839	0.44124	0.33703	0.07054	0.44124	0.41058	0.12281	0.44124	0.56957	0.1804														0.170158	0.112	0.565	0.170158	0.112
																	0.44505	0.40606	0.05419	0.44505	0.37192	0.07766	0.44505	0.33915	0.07195	0.44505	0.41305	0.12665	0.44505	0.57363	0.1815														0.167843	0.113	0.57	0.169	0.113
																	0.44885	0.41045	0.05394	0.44885	0.37447	0.08	0.44885	0.34215	0.07081	0.44885	0.41536	0.12475	0.44885	0.57588	0.1832														0.166685	0.114	0.575	0.169	0.114
																	0.45265	0.41234	0.05542	0.45265	0.37534	0.08033	0.45265	0.3431	0.07177	0.45265	0.41844	0.12599	0.45265	0.58068	0.18434														0.165528	0.115	0.58	0.167843	0.115
																	0.45646	0.41433	0.05656	0.45646	0.379	0.08034	0.45646	0.34677	0.07146	0.45646	0.42069	0.12759	0.45646	0.58378	0.18492														0.167843	0.116	0.585	0.171315	0.116
																	0.46026	0.4178	0.0566	0.46026	0.38198	0.08248	0.46026	0.34927	0.07454	0.46026	0.42456	0.12765	0.46026	0.58849	0.18566														0.171315	0.117	0.59	0.171315	0.117
																	0.46406	0.42056	0.05714	0.46406	0.38348	0.08066	0.46406	0.35096	0.07374	0.46406	0.42496	0.12835	0.46406	0.59247	0.18753														0.174788	0.118	0.595	0.169	0.118
																	0.46787	0.42461	0.05739	0.46787	0.38423	0.08237	0.46787	0.35417	0.07381	0.46787	0.42751	0.13012	0.46787	0.59419	0.18828														0.178261	0.119	0.6	0.170158	0.119
																	0.47167	0.42683	0.05808	0.47167	0.38958	0.08257	0.47167	0.35493	0.07501	0.47167	0.43152	0.13165	0.47167	0.59995	0.19072														0.174788	0.12	0.605	0.175946	0.12
																	0.47548	0.42845	0.05762	0.47548	0.39085	0.08346	0.47548	0.35723	0.07476	0.47548	0.4326	0.13263	0.47548	0.6026	0.19042														0.173631	0.121	0.61	0.180576	0.121
																	0.47928	0.43119	0.05808	0.47928	0.39376	0.08297	0.47928	0.35935	0.07631	0.47928	0.43589	0.13325	0.47928	0.60814	0.19154														0.177103	0.122	0.615	0.179418	0.122
																	0.48308	0.43489	0.05905	0.48308	0.3956	0.08503	0.48308	0.36203	0.07609	0.48308	0.43909	0.13281	0.48308	0.60854	0.19409														0.179418	0.123	0.62	0.181733	0.123
																	0.48689	0.43749	0.05885	0.48689	0.39883	0.08465	0.48689	0.36559	0.07744	0.48689	0.44188	0.1363	0.48689	0.61485	0.19566														0.177103	0.124	0.625	0.184048	0.124
																	0.49069	0.44166	0.05912	0.49069	0.40147	0.08421	0.49069	0.36597	0.07612	0.49069	0.44394	0.13492	0.49069	0.61696	0.19645														0.173631	0.125	0.63	0.182891	0.125
																	0.49449	0.4423	0.06017	0.49449	0.40237	0.08616	0.49449	0.3681	0.07918	0.49449	0.44739	0.13772	0.49449	0.61967	0.19611														0.178261	0.126	0.635	0.179418	0.126
																	0.4983	0.44709	0.05913	0.4983	0.40547	0.08561	0.4983	0.37058	0.0769	0.4983	0.44817	0.13724	0.4983	0.62462	0.19688														0.177103	0.127	0.64	0.179418	0.127
																	0.5021	0.4477	0.06356	0.5021	0.4085	0.08752	0.5021	0.37234	0.07742	0.5021	0.45143	0.13878	0.5021	0.62773	0.20017														0.179418	0.128	0.645	0.178261	0.128
																	0.50591	0.44961	0.06242	0.50591	0.4099	0.0853	0.50591	0.37426	0.07919	0.50591	0.45404	0.13964	0.50591	0.63162	0.20146														0.180576	0.129	0.65	0.177103	0.129
																	0.50971	0.45463	0.06019	0.50971	0.41458	0.08806	0.50971	0.37737	0.07782	0.50971	0.45588	0.13908	0.50971	0.6357	0.20096														0.180576	0.13	0.655	0.180576	0.13
																	0.51351	0.45576	0.06193	0.51351	0.41377	0.08703	0.51351	0.37938	0.08092	0.51351	0.46015	0.14075	0.51351	0.63929	0.20184														0.182891	0.131	0.66	0.185206	0.131
																	0.51732	0.46059	0.06189	0.51732	0.4173	0.08904	0.51732	0.38067	0.07915	0.51732	0.46034	0.14128	0.51732	0.6408	0.20296														0.185206	0.132	0.665	0.181733	0.132
																	0.52112	0.46194	0.06299	0.52112	0.41924	0.08879	0.52112	0.3833	0.08025	0.52112	0.46415	0.1426	0.52112	0.6452	0.20333														0.189836	0.133	0.67	0.185206	0.133
																	0.52492	0.46556	0.06264	0.52492	0.42152	0.08926	0.52492	0.38636	0.08046	0.52492	0.46545	0.14226	0.52492	0.64824	0.20644														0.190994	0.134	0.675	0.185206	0.134
																	0.52873	0.46727	0.06447	0.52873	0.42443	0.09002	0.52873	0.38689	0.08179	0.52873	0.46824	0.143	0.52873	0.65145	0.20736														0.185206	0.135	0.68	0.187521	0.135
																	0.53253	0.47031	0.06223	0.53253	0.42577	0.09031	0.53253	0.38905	0.0816	0.53253	0.47153	0.1443	0.53253	0.65485	0.20764														0.188679	0.136	0.685	0.188679	0.136
																	0.53634	0.47155	0.0641	0.53634	0.43095	0.09183	0.53634	0.39151	0.08309	0.53634	0.47288	0.14487	0.53634	0.65902	0.20818														0.189836	0.137	0.69	0.190994	0.137
																	0.54014	0.47486	0.06394	0.54014	0.43112	0.09081	0.54014	0.39371	0.08467	0.54014	0.4765	0.14525	0.54014	0.66246	0.21019														0.192151	0.138	0.695	0.192151	0.138
																	0.54394	0.47788	0.06591	0.54394	0.43188	0.09168	0.54394	0.39606	0.08134	0.54394	0.47657	0.14807	0.54394	0.6645	0.21003														0.194466	0.139	0.7	0.189836	0.139
																	0.54775	0.48076	0.06518	0.54775	0.43568	0.09221	0.54775	0.3972	0.08518	0.54775	0.48108	0.14671	0.54775	0.66848	0.21188														0.199096	0.14	0.705	0.189836	0.14
																	0.55155	0.48368	0.06783	0.55155	0.43966	0.09101	0.55155	0.39931	0.08385	0.55155	0.48146	0.14727	0.55155	0.67335	0.21246														0.196781	0.141	0.71	0.189836	0.141
																	0.55536	0.48592	0.0662	0.55536	0.44003	0.09319	0.55536	0.4007	0.08395	0.55536	0.48411	0.14773	0.55536	0.67546	0.21471														0.197939	0.142	0.715	0.189836	0.142
																	0.55916	0.48768	0.06655	0.55916	0.44231	0.0933	0.55916	0.40365	0.08482	0.55916	0.48733	0.14868	0.55916	0.67921	0.21339														0.197939	0.143	0.72	0.192151	0.143
																	0.56296	0.49079	0.06654	0.56296	0.44546	0.09448	0.56296	0.40563	0.08476	0.56296	0.48822	0.14963	0.56296	0.68012	0.21812														0.197939	0.144	0.725	0.196781	0.144
																	0.56677	0.49332	0.06693	0.56677	0.44731	0.09547	0.56677	0.40786	0.08579	0.56677	0.49317	0.15107	0.56677	0.68541	0.21807														0.197939	0.145	0.73	0.197939	0.145
																	0.57057	0.49563	0.06671	0.57057	0.44922	0.09416	0.57057	0.40927	0.08595	0.57057	0.49351	0.15128	0.57057	0.6875	0.21806														0.200254	0.146	0.735	0.195624	0.146
																	0.57437	0.49681	0.06785	0.57437	0.45126	0.0935	0.57437	0.41224	0.0862	0.57437	0.49644	0.1527	0.57437	0.68981	0.21891														0.199096	0.147	0.74	0.196781	0.147
																	0.57818	0.50086	0.06716	0.57818	0.45563	0.09568	0.57818	0.41276	0.08713	0.57818	0.49768	0.15366	0.57818	0.69607	0.22153														0.201411	0.148	0.745	0.195624	0.148
																	0.58198	0.50273	0.06846	0.58198	0.45668	0.09672	0.58198	0.41429	0.0875	0.58198	0.50121	0.15358	0.58198	0.69761	0.22186														0.201411	0.149	0.75	0.195624	0.149
																	0.58579	0.50632	0.06879	0.58579	0.45843	0.09563	0.58579	0.41743	0.08751	0.58579	0.5046	0.15558	0.58579	0.70089	0.22328														0.203726	0.15	0.755	0.194466	0.15
																	0.58959	0.5087	0.07025	0.58959	0.46037	0.09751	0.58959	0.42038	0.08816	0.58959	0.50431	0.15506	0.58959	0.70406	0.22378														0.207199	0.151	0.76	0.194466	0.151
																	0.59339	0.51021	0.06954	0.59339	0.46291	0.09737	0.59339	0.4218	0.08863	0.59339	0.50831	0.15511	0.59339	0.70713	0.224														0.207199	0.152	0.765	0.197939	0.152
																	0.5972	0.51402	0.06889	0.5972	0.4653	0.09764	0.5972	0.42358	0.08814	0.5972	0.50815	0.1562	0.5972	0.71003	0.22522														0.209514	0.153	0.77	0.200254	0.153
																	0.601	0.51549	0.07059	0.601	0.46636	0.09786	0.601	0.42559	0.0913	0.601	0.51305	0.15745	0.601	0.71266	0.22626														0.208357	0.154	0.775	0.200254	0.154
																	0.6048	0.51845	0.07229	0.6048	0.46891	0.09805	0.6048	0.42755	0.08934	0.6048	0.51684	0.15908	0.6048	0.71644	0.22579														0.206042	0.155	0.78	0.204884	0.155
																	0.60861	0.52029	0.07185	0.60861	0.47185	0.09938	0.60861	0.4294	0.08978	0.60861	0.51688	0.15833	0.60861	0.71843	0.22951														0.207199	0.156	0.785	0.204884	0.156
																	0.61241	0.52405	0.07252	0.61241	0.47345	0.09964	0.61241	0.43122	0.09116	0.61241	0.52094	0.1601	0.61241	0.72219	0.22978														0.208357	0.157	0.79	0.204884	0.157
																	0.61622	0.5262	0.07213	0.61622	0.47581	0.10025	0.61622	0.43294	0.09061	0.61622	0.52074	0.15931	0.61622	0.72461	0.2291														0.208357	0.158	0.795	0.203726	0.158
																	0.62002	0.52848	0.0715	0.62002	0.4783	0.10127	0.62002	0.43678	0.09211	0.62002	0.52387	0.15936	0.62002	0.72811	0.23135														0.209514	0.159	0.8	0.201411	0.159
																	0.62382	0.52935	0.073	0.62382	0.47967	0.10022	0.62382	0.43744	0.09039	0.62382	0.52516	0.16084	0.62382	0.73067	0.23222														0.211829	0.16	0.805	0.204884	0.16
																	0.62763	0.53413	0.07325	0.62763	0.48183	0.1002	0.62763	0.43892	0.09136	0.62763	0.52848	0.16237	0.62763	0.73509	0.23209														0.212987	0.161	0.81	0.207199	0.161
																	0.63143	0.53517	0.07304	0.63143	0.4846	0.10257	0.63143	0.4399	0.09192	0.63143	0.53063	0.16258	0.63143	0.73794	0.23266														0.214144	0.162	0.815	0.207199	0.162
																	0.63524	0.53783	0.0738	0.63524	0.48712	0.1023	0.63524	0.44281	0.09305	0.63524	0.53114	0.16324	0.63524	0.73984	0.23544														0.214144	0.163	0.82	0.206042	0.163
																	0.63904	0.54013	0.07322	0.63904	0.48961	0.10349	0.63904	0.4438	0.09313	0.63904	0.53469	0.1637	0.63904	0.74478	0.23562														0.216459	0.164	0.825	0.210672	0.164
																	0.64284	0.54311	0.07496	0.64284	0.49156	0.10157	0.64284	0.44567	0.0936	0.64284	0.53628	0.1644	0.64284	0.74557	0.23624														0.218774	0.165	0.83	0.212987	0.165
[truncated: 3,727 more rows]
[truncated: 130 more columns]

## Sheet: Figure 3
	Panel B

## Sheet: Figure S2
	Panel A					Panel B					Source data for panel A
[truncated: 5,091 more rows]

[truncated: 5 more sheets: Figure S3, Figure S4, Figure S5, Figure S6, Figure S8]
